# Supplementary material for: Msn2/4 regulate expression of glycolytic enzymes and control transition from quiescence to growth
Source: eLife. 2017 Sep 26;6:e29938. doi: 10.7554/eLife.29938 (PMC5634782; doi:10.7554/eLife.29938)
Supplement: Figure 1—source data 2. [file elife-29938-fig1-data2.xlsx]

## Sheet: Sheet1
Total	ACE2_count	ADR1_count	ARG80_count	DOT6_count	ECM23_count	GCR1_count	GCR2_count	GIS1_count	MBP1::SWI6_count	MIG1_count	MIG2_count	MIG3_count	MOT3_count	MSN2_count	MSN4_count	RAP1_count	RDS1_count	RGM1_count	RPH1_count	RSC30_count	SFL1_count	SFP1_count	SPT23_count	STB3_count	STE12_count	STP2_count	SUM1_count	SUT1_count	TBS1_count	TEA1_count	TOD6_count	TOS8_count	UGA3_count	XBP1_count	YAP5_count	YER130C_count	YGR067C_count	YLL054C_count	YML081W_count	ZMS1_count	ACE2_fold	ADR1_fold	ARG80_fold	DOT6_fold	ECM23_fold	GCR1_fold	GCR2_fold	GIS1_fold	MBP1::SWI6_fold
amino acid transport	40	1	3	8	1	0	4	0	3	0	3	2	4	4	4	3	2	2	4	1	1	1	0	2	2	2	5	0	5	2	2	0	5	2	0	0	0	3	3	3	4	0.510745	1.25528	2.37667	0.503531	0	2.25633	0	1.24072
ATPase activity	262	11	12	19	24	10	11	15	15	9	4	7	4	16	19	15	9	6	15	14	3	8	29	19	27	10	4	28	11	3	8	21	3	7	5	16	11	9	10	7	11	0.85774	0.766584	0.861768	1.845	1.97201	0.947314	0.993202	0.947114
biological_process	1853	75	116	111	51	34	58	90	145	46	110	99	92	163	180	143	74	63	147	111	69	73	62	94	81	74	56	51	116	60	92	67	64	85	58	94	93	80	97	78	107	0.826894	1.04776	0.711846	0.554346	0.948012	0.706244	0.842587	1.29451
carbohydrate metabolic process	257	16	35	21	4	6	8	13	33	9	34	35	32	24	46	38	12	17	37	27	27	13	14	11	12	19	17	6	41	17	26	6	7	23	5	17	26	29	27	32	40	1.27189	2.27937	0.971012	0.313482	1.20623	0.702359	0.877522	2.12419
carbohydrate transport	33	0	4	0	0	0	0	0	3	0	7	7	6	0	7	2	1	1	3	3	4	1	0	2	0	2	2	0	8	2	2	0	1	2	0	0	2	4	1	6	7	0	2.02874	0	0	0	0	0	1.5039
cell budding	61	2	2	10	3	0	1	2	3	10	1	0	1	5	2	1	3	2	2	2	2	4	4	4	5	5	0	2	3	1	3	5	5	3	3	4	3	2	1	0	0	0.669829	0.548757	1.94809	0.990553	0	0.36989	0.568785	0.813586
cell cortex	146	5	7	16	5	1	0	5	11	8	2	2	2	17	13	8	9	6	11	9	2	3	8	9	9	12	3	3	5	3	4	6	11	7	2	7	9	5	7	4	6	0.699651	0.802463	1.30228	0.689769	0.353881	0	0.594107	1.24638
cell morphogenesis	29	0	4	4	1	0	0	0	2	1	4	3	3	2	2	1	0	2	1	1	3	0	1	2	1	3	0	1	3	2	3	1	1	3	0	1	1	1	2	0	0	0	2.30856	1.63908	0.694526	0	0	0	1.14089
cell wall	96	4	8	8	0	2	4	2	8	1	6	8	7	6	9	8	5	5	8	7	8	2	10	6	10	9	5	6	8	3	11	0	4	6	2	3	6	6	10	5	6	0.851242	1.39476	0.990278	0	1.07639	0.940137	0.361415	1.37858
cell wall organization or biogenesis	199	17	12	23	7	5	8	10	14	8	9	11	6	28	14	11	4	11	13	9	13	10	17	12	15	17	8	10	15	7	11	9	11	10	2	15	9	8	13	6	10	1.74526	1.00927	1.37345	0.708486	1.29816	0.907067	0.871755	1.16382
cellular amino acid metabolic process	207	30	14	72	15	6	20	21	14	2	12	9	9	33	13	15	22	13	12	9	11	31	29	22	39	20	4	21	13	10	14	17	23	16	4	36	9	8	14	8	11	2.96084	1.13198	4.13333	1.45951	1.49758	2.18003	1.75994	1.11885
cellular bud	207	7	5	18	3	3	2	5	10	12	1	0	2	18	11	6	7	8	11	8	4	6	10	9	15	18	3	5	8	4	7	3	8	4	6	10	7	2	7	1	2	0.690863	0.404278	1.03333	0.291902	0.748792	0.218003	0.419032	0.799175
cellular ion homeostasis	125	4	12	15	11	3	3	8	7	4	9	11	10	12	13	9	5	5	8	7	6	8	8	4	11	11	6	7	11	4	10	8	3	7	1	6	7	7	11	7	7	0.653754	1.60676	1.426	1.77243	1.24	0.541519	1.11027	0.926404
cellular respiration	90	8	13	4	3	11	6	6	9	7	13	15	14	11	16	10	1	9	6	5	9	5	4	4	7	3	3	4	14	6	9	2	1	8	5	7	4	9	10	9	14	1.81598	2.41758	0.528148	0.671375	6.31481	1.50422	1.15653	1.65429
cellular response to DNA damage stimulus	298	15	11	11	5	4	11	12	14	14	9	9	10	19	16	14	12	8	13	10	10	8	16	13	15	12	4	11	11	1	9	9	8	8	3	13	8	7	10	6	9	1.02835	0.617812	0.438647	0.33794	0.693512	0.832873	0.698574	0.777184
cellular_component	1397	56	81	82	30	28	48	66	95	42	81	75	67	110	118	89	50	46	94	66	52	65	41	59	54	55	41	30	85	46	64	39	50	61	48	65	62	54	70	53	74	0.818947	0.97044	0.697518	0.432525	1.03555	0.77526	0.819587	1.12497
chromatin binding	102	8	1	4	5	1	5	11	4	3	2	2	3	5	3	3	7	2	3	4	2	2	10	11	8	7	2	7	5	2	5	12	0	4	0	7	3	1	3	2	2	1.60234	0.164089	0.466013	0.987316	0.506536	1.10604	1.87086	0.648742
chromatin organization	261	15	9	17	11	3	8	9	18	10	7	7	7	20	17	18	13	12	17	15	15	8	20	22	17	10	7	8	17	5	15	15	4	13	2	18	13	11	14	5	9	1.17413	0.577141	0.77401	0.848865	0.59387	0.691595	0.598205	1.14089
chromosome	374	18	12	20	15	5	13	20	18	14	8	7	9	22	20	19	15	14	18	14	14	14	21	18	18	18	8	14	17	6	16	17	8	12	4	19	8	8	14	5	10	0.983252	0.537019	0.635472	0.807804	0.690731	0.784286	0.927697	0.796183
chromosome segregation	187	10	9	9	4	2	8	6	7	8	4	6	5	15	10	8	9	7	8	5	6	7	5	9	10	10	3	3	6	3	6	5	6	5	4	8	4	6	6	6	9	1.0925	0.805528	0.571925	0.430829	0.552585	0.965274	0.556618	0.619254
cofactor metabolic process	135	8	20	18	9	2	5	8	18	1	19	22	19	17	23	21	4	15	18	10	12	9	13	10	18	9	7	8	21	5	21	9	7	19	3	14	11	17	19	21	22	1.21065	2.47957	1.58444	1.34275	0.765432	0.835677	1.02803	2.20572
conjugation	125	2	4	12	9	1	2	4	4	6	5	6	6	15	5	4	7	5	4	3	5	4	13	14	12	23	2	8	7	2	6	10	9	4	2	11	3	2	3	1	2	0.326877	0.535587	1.1408	1.45017	0.413333	0.361013	0.555134	0.529374
cytokinesis	86	4	3	9	6	0	1	2	3	4	1	0	1	7	2	2	5	2	4	2	2	3	6	3	9	8	0	5	1	2	1	7	5	2	2	4	5	2	2	1	1	0.950223	0.583852	1.2436	1.4052	0	0.262364	0.40344	0.577079
cytoplasm	4021	212	269	384	205	90	147	222	271	105	206	210	203	417	352	292	223	163	273	200	172	206	299	275	349	261	114	260	268	105	218	240	196	163	79	269	188	167	219	166	226	1.07712	1.11969	1.13484	1.02685	1.15643	0.82487	0.957782	1.11493
cytoplasmic membrane-bounded vesicle	107	7	8	10	4	4	3	5	6	3	5	5	5	12	10	7	6	7	7	4	5	5	7	3	9	6	5	5	5	1	5	5	5	3	1	4	3	4	5	4	3	1.33653	1.25137	1.11059	0.752944	1.93146	0.632616	0.810651	0.927641
cytoplasmic translation	171	12	6	20	10	0	11	17	5	1	5	4	3	38	7	6	59	4	4	4	2	17	21	31	29	35	1	30	5	3	5	10	17	2	1	24	1	1	4	1	3	1.43367	0.587266	1.38986	1.17785	0	1.45144	1.72465	0.483711
cytoskeletal protein binding	66	6	6	9	5	1	2	3	4	1	1	2	1	9	5	4	6	4	4	2	4	3	1	5	6	6	2	2	4	2	6	5	5	3	0	4	2	3	6	4	4	1.85725	1.52155	1.62045	1.52585	0.782828	0.683736	0.788542	1.0026
cytoskeleton	204	6	9	13	5	2	1	2	8	8	4	3	3	17	8	7	8	6	6	7	4	5	7	9	9	13	5	4	6	4	5	6	13	4	4	10	6	3	7	4	6	0.600876	0.738401	0.757271	0.493658	0.506536	0.110604	0.170078	0.648742
cytoskeleton organization	242	13	10	17	7	3	7	7	10	14	3	3	3	25	11	11	12	9	10	7	5	11	13	15	18	15	5	8	10	5	7	9	10	7	6	9	7	6	12	5	6	1.09747	0.691615	0.83478	0.582598	0.640496	0.652657	0.5018	0.683592
DNA binding	379	16	28	30	18	7	15	22	27	17	18	21	18	26	37	29	19	23	30	21	22	16	27	23	17	20	11	16	31	11	23	27	14	23	4	20	18	18	30	16	23	0.862472	1.23651	0.940633	0.956576	0.954266	0.893006	1.007	1.17852
DNA recombination	179	5	5	9	4	3	8	7	7	10	2	2	3	13	7	7	6	3	6	3	3	8	6	7	10	9	2	3	6	1	3	5	2	4	5	9	4	4	3	5	5	0.570665	0.467516	0.597486	0.450084	0.865922	1.00842	0.678411	0.64693
DNA repair	245	12	7	9	5	3	10	11	9	12	6	6	7	16	9	9	10	7	8	5	8	7	14	12	14	11	2	10	8	1	8	9	6	6	2	11	3	5	8	4	6	1.00064	0.478203	0.436531	0.411046	0.632653	0.920951	0.778887	0.607699
DNA replication	152	7	5	6	1	4	3	7	5	10	4	3	3	8	8	6	2	3	7	4	2	4	11	8	8	4	1	6	3	0	4	5	4	3	1	3	5	4	2	3	6	0.940846	0.550562	0.469079	0.132508	1.35965	0.445328	0.798918	0.544175
DNA-templated transcription, elongation	92	9	0	9	4	2	7	8	1	3	0	0	0	7	1	1	3	0	1	1	0	6	10	10	8	6	0	6	1	0	0	6	2	0	0	8	1	2	0	1	1	1.99857	0	1.1625	0.875706	1.12319	1.71677	1.50852	0.179814
DNA-templated transcription, initiation	71	5	3	4	2	0	3	8	4	1	2	2	2	10	4	3	2	2	3	2	1	2	8	8	7	1	0	6	2	0	2	7	1	3	2	7	2	1	2	2	1	1.43872	0.707201	0.669484	0.567359	0	0.953378	1.9547	0.931996
DNA-templated transcription, termination	43	1	0	2	2	0	2	0	0	0	0	0	0	3	0	0	0	1	0	0	0	1	5	1	6	0	0	4	0	0	0	4	2	1	1	3	0	0	1	0	0	0.475112	0	0.552713	0.936802	0	1.04946	0	0
endocytosis	97	2	7	9	1	3	0	3	7	3	5	5	5	9	8	8	4	2	9	6	4	3	6	5	4	7	4	4	6	3	2	0	4	3	2	6	9	6	3	6	6	0.421233	1.20783	1.10258	0.207642	1.59794	0	0.536534	1.19382
endomembrane system	791	33	36	58	32	20	21	41	43	24	31	29	29	72	61	49	31	31	46	32	28	34	48	32	61	36	16	37	38	14	39	34	37	17	7	43	25	25	38	24	37	0.852318	0.761739	0.871344	0.814816	1.30636	0.599025	0.899197	0.899299
endoplasmic reticulum	410	14	27	27	18	12	7	18	32	13	23	23	24	33	46	37	20	21	35	26	22	18	22	20	33	20	11	18	30	12	28	17	22	15	3	18	18	17	28	18	27	0.697603	1.1022	0.782561	0.88425	1.5122	0.385227	0.761617	1.29115
endosomal transport	88	1	3	3	0	3	1	2	3	0	0	0	0	5	4	5	2	0	4	1	0	2	4	0	4	0	0	1	0	0	0	1	2	1	0	3	3	1	1	1	2	0.232157	0.570583	0.405114	0	1.76136	0.256401	0.394271	0.563963
enzyme binding	64	4	4	6	0	2	3	5	6	4	1	2	2	3	8	8	0	2	7	6	3	4	7	4	1	3	1	1	3	2	1	2	1	3	1	5	7	5	2	2	2	1.27686	1.04607	1.11406	0	1.61458	1.05765	1.35531	1.5509
enzyme regulator activity	224	17	11	22	8	6	7	14	14	8	11	13	11	25	20	19	12	6	17	12	12	16	13	15	16	19	9	11	18	6	8	8	9	8	7	11	9	12	15	11	10	1.55048	0.821911	1.16711	0.71933	1.38393	0.705103	1.08425	1.03393
exocytosis	48	1	2	3	2	1	0	2	2	1	1	1	1	2	2	1	2	2	3	1	1	1	3	4	2	4	1	0	2	0	2	2	2	1	0	1	2	1	2	1	1	0.425621	0.697379	0.742708	0.839218	1.07639	0	0.72283	0.689288
extracellular region	28	0	4	4	0	1	2	1	3	0	4	5	3	4	6	4	1	3	3	1	4	0	2	3	2	5	2	1	4	1	5	0	4	1	0	4	0	2	5	2	4	0	2.39101	1.69762	0	1.84524	1.61166	0.619569	1.77246
generation of precursor metabolites and energy	160	12	29	8	6	12	8	9	28	9	30	34	31	16	39	30	6	16	26	23	23	7	8	7	9	8	9	6	37	10	21	4	4	19	6	11	20	21	23	23	34	1.53223	3.0336	0.594167	0.755297	3.875	1.12816	0.975821	2.89501
Golgi apparatus	196	12	2	19	7	5	7	18	6	8	4	4	3	23	6	6	8	5	5	4	5	11	10	6	18	11	1	12	2	0	5	8	8	2	2	16	4	2	4	3	4	1.2508	0.170787	1.15196	0.71933	1.31803	0.805832	1.59318	0.506416
Golgi vesicle transport	190	6	4	15	4	7	6	11	7	5	4	5	2	14	8	7	7	5	5	3	3	6	11	6	10	10	3	9	3	1	2	5	6	2	1	11	1	2	6	3	3	0.645152	0.35236	0.938158	0.424026	1.90351	0.712525	1.00435	0.609476
GTPase activity	62	4	1	5	8	4	1	3	2	6	1	1	0	3	2	2	2	2	2	2	0	1	8	6	6	3	0	8	2	0	0	7	3	0	2	1	2	1	2	0	1	1.31805	0.269953	0.958333	2.59887	3.33333	0.363924	0.839416	0.533643
guanyl-nucleotide exchange factor activity	41	2	0	1	0	0	2	5	3	2	1	2	0	5	2	2	4	2	2	2	0	1	5	3	7	4	0	2	0	0	0	0	1	1	0	5	2	0	2	0	0	0.996576	0	0.289837	0	0	1.10065	2.1156	1.21046
helicase activity	86	6	0	3	11	3	1	3	1	10	0	0	0	7	1	1	1	0	0	1	0	4	12	6	13	2	0	12	0	0	0	13	0	0	9	6	0	0	1	0	0	1.42533	0	0.414535	2.57621	1.80233	0.262364	0.60516	0.19236
histone binding	41	4	0	2	1	0	0	0	1	2	0	0	0	1	1	2	1	1	1	2	1	0	3	2	2	0	1	0	1	0	2	3	0	1	0	2	1	1	2	0	1	1.99315	0	0.579675	0.49125	0	0	0	0.403486
histone modification	111	7	4	9	4	1	4	5	6	4	3	3	2	10	5	6	5	3	6	4	4	3	9	11	10	4	2	5	4	2	4	4	3	4	2	8	5	3	4	2	2	1.28837	0.603138	0.963514	0.725811	0.465465	0.813092	0.781438	0.894212
hydrolase activity	821	36	42	65	48	20	21	35	36	33	27	32	29	61	54	41	25	23	43	26	22	28	63	54	75	33	18	55	43	15	35	51	21	25	22	45	33	31	31	27	34	0.895826	0.856221	0.940824	1.17756	1.25863	0.577137	0.739559	0.72539
hydrolase activity, acting on glycosyl bonds	46	3	5	2	0	0	1	2	3	0	4	5	5	4	7	4	3	1	4	2	3	1	3	3	1	3	2	2	5	4	3	0	0	0	0	2	3	4	2	4	4	1.33238	1.81925	0.516667	0	0	0.490506	0.754258	1.07889
invasive growth in response to glucose limitation	60	1	5	2	3	0	2	2	3	1	3	3	2	5	4	3	3	2	2	1	2	2	5	3	6	8	2	3	4	1	4	4	0	2	0	4	2	1	6	2	3	0.340497	1.39476	0.396111	1.00706	0	0.75211	0.578264	0.827146
ion binding	174	7	8	12	11	5	9	12	7	5	7	8	6	17	13	9	10	6	7	7	5	9	17	12	10	11	3	13	9	7	4	10	5	3	3	12	6	7	6	5	7	0.821888	0.769521	0.81954	1.2733	1.48467	1.16707	1.19641	0.66552
ion transport	236	9	23	26	12	7	7	11	19	3	14	14	13	18	24	20	8	13	19	12	18	8	10	14	16	12	18	5	28	16	15	8	15	11	6	7	12	13	20	15	19	0.779103	1.63116	1.30918	1.02413	1.53249	0.66925	0.80859	1.33185
isomerase activity	58	5	4	4	3	3	1	1	3	4	3	3	4	5	5	3	3	0	2	2	4	6	7	2	8	1	0	5	4	1	2	4	4	3	3	2	3	2	1	2	3	1.76119	1.15428	0.81954	1.04179	2.67241	0.389022	0.299102	0.855668
kinase activity	197	5	11	13	7	3	5	7	17	8	11	12	11	22	20	15	7	8	15	12	11	9	13	14	15	15	6	9	11	3	8	7	10	11	3	10	13	8	12	10	13	0.518523	0.934558	0.784179	0.715679	0.786802	0.572672	0.616424	1.42756
ligase activity	101	7	10	22	7	1	1	9	8	5	5	6	7	9	8	7	8	4	8	5	5	11	16	5	14	9	6	17	9	3	9	8	3	6	2	11	2	7	5	7	9	1.41593	1.65714	2.58845	1.39593	0.511551	0.223399	1.54586	1.31033
lipid binding	97	3	7	6	1	5	4	7	10	2	5	5	4	13	13	9	6	3	10	9	5	4	6	3	3	6	2	3	4	4	2	1	2	1	2	6	7	7	3	6	8	0.631849	1.20783	0.735052	0.207642	2.66323	0.930445	1.25191	1.70546
lipid metabolic process	276	17	22	26	15	5	8	16	13	5	15	16	20	24	31	18	11	21	18	12	16	9	16	15	24	14	12	13	23	12	26	16	17	17	4	13	12	9	25	8	19	1.25836	1.33412	1.11944	1.09463	0.93599	0.654008	1.00568	0.779196
lipid transport	57	2	5	8	4	3	1	2	6	0	2	2	2	6	5	6	5	2	7	4	4	3	4	5	5	7	2	4	3	2	3	4	2	2	0	4	1	5	2	4	5	0.716835	1.46817	1.66784	1.41342	2.7193	0.395847	0.608699	1.74136
lyase activity	87	8	6	20	3	1	4	6	9	2	5	5	5	13	13	9	2	8	8	9	5	7	10	8	11	6	3	5	8	5	5	4	4	6	1	13	8	3	7	3	8	1.8786	1.15428	2.7318	0.694526	0.59387	1.03739	1.19641	1.71134
meiotic cell cycle	282	11	12	14	3	4	9	8	14	8	8	10	7	18	16	13	6	14	15	12	11	10	7	13	13	12	4	5	13	4	13	6	8	12	2	11	12	12	15	8	12	0.796907	0.712217	0.589953	0.214269	0.732861	0.720105	0.49214	0.82128
membrane	1681	76	110	131	71	48	45	68	107	41	92	95	86	141	146	109	68	74	107	83	83	69	90	92	117	85	63	69	120	55	97	70	68	70	34	85	77	76	102	79	103	0.923655	1.09523	0.926066	0.850701	1.47531	0.604014	0.70176	1.053
membrane fusion	76	3	4	6	2	2	3	6	4	2	4	5	4	7	6	5	3	3	4	4	3	3	2	3	3	0	2	3	4	0	1	1	3	3	3	5	3	3	3	3	4	0.806439	0.880899	0.938158	0.530033	1.35965	0.890656	1.36957	0.87068
membrane invagination	43	5	0	3	1	1	0	2	1	0	0	0	0	7	0	0	2	0	0	0	0	2	1	3	2	1	0	1	0	0	0	1	4	0	1	5	0	1	2	0	0	2.37556	0	0.82907	0.468401	1.20155	0	0.806881	0.384719
methyltransferase activity	91	8	3	10	10	0	4	5	5	2	4	3	2	12	6	5	3	2	5	4	3	4	15	7	19	8	3	15	4	1	2	17	8	3	0	8	5	2	3	3	2	1.79603	0.551772	1.30586	2.21332	0	0.991793	0.953183	0.908952
microtubule organizing center	71	2	1	2	3	1	0	0	1	3	0	0	0	3	0	2	2	1	1	2	0	3	1	4	3	4	0	1	0	0	0	4	3	0	0	3	1	0	0	0	0	0.575487	0.235734	0.334742	0.851038	0.7277	0	0	0.232999
mitochondrial envelope	354	30	31	30	17	22	11	12	28	19	30	34	30	33	39	30	9	18	26	18	27	18	21	23	33	15	16	17	34	18	26	17	19	14	23	20	18	22	33	24	32	1.73134	1.46568	1.00706	0.967235	3.21092	0.701119	0.588065	1.30848
mitochondrial translation	139	6	2	11	5	3	3	7	3	6	1	2	1	8	2	2	6	0	2	2	1	7	3	9	7	4	2	6	1	0	1	9	5	1	4	9	1	1	1	2	2	0.881862	0.240821	0.940408	0.724505	1.11511	0.486978	0.873637	0.357042
mitochondrion	1156	68	98	117	68	38	41	52	101	43	78	86	81	103	136	108	41	63	101	74	75	53	77	77	93	54	39	64	103	40	76	75	58	62	36	76	61	72	90	73	96	1.20175	1.41889	1.20272	1.18478	1.69839	0.800255	0.780357	1.44536
mitochondrion organization	387	24	17	38	18	9	5	19	20	15	13	16	15	36	21	20	15	12	18	14	13	20	19	32	33	16	7	23	19	9	19	19	18	12	11	23	14	8	24	7	13	1.26696	0.735221	1.16684	0.936802	1.20155	0.291515	0.851707	0.854931
mitotic cell cycle	325	21	13	26	10	7	10	10	16	17	7	7	7	27	17	15	9	9	17	12	10	9	15	21	19	14	5	11	10	5	11	14	11	8	6	14	12	9	11	8	11	1.32008	0.669484	0.950667	0.619731	1.11282	0.694255	0.533783	0.814421
molecular_function	2671	120	153	173	115	52	87	134	182	64	138	128	122	240	230	190	113	94	189	137	102	117	133	139	167	119	72	113	162	74	125	131	99	112	64	136	121	99	132	97	140	0.917849	0.958733	0.769681	0.867182	1.00587	0.734933	0.870319	1.12722
monocarboxylic acid metabolic process	125	6	23	10	6	3	7	5	18	3	20	20	23	11	28	19	5	21	19	14	22	2	7	7	7	7	12	4	33	10	23	7	6	26	4	7	15	15	25	15	24	0.98063	3.07962	0.950667	0.96678	1.24	1.26354	0.693917	2.38218
mRNA binding	172	11	5	15	24	0	8	9	8	4	2	2	2	28	9	8	13	6	6	7	4	15	40	15	33	19	5	43	11	5	6	34	7	8	0	17	6	2	8	2	6	1.30656	0.486543	1.03634	2.81041	0	1.04946	0.907741	0.769438
mRNA processing	194	7	5	14	9	2	4	8	2	3	3	3	3	14	4	3	10	2	2	0	2	4	16	9	17	8	2	11	5	2	2	12	7	5	4	9	1	2	3	3	3	0.737158	0.431368	0.85756	0.934388	0.532646	0.465222	0.715379	0.170546
not_yet_annotated	3	0	2	0	0	0	0	0	0	0	0	0	0	1	0	0	0	0	0	0	0	0	0	0	0	0	0	0	0	0	2	0	0	0	0	0	0	0	0	0	0	0	11.1581	0	0	0	0	0	0
nuclear transport	173	13	4	21	22	1	12	18	5	3	3	4	3	28	6	4	16	2	5	5	3	14	40	26	28	14	0	33	2	0	2	29	7	2	1	15	6	2	2	2	3	1.53519	0.386985	1.44249	2.56131	0.298651	1.56508	1.80499	0.478119
nuclease activity	94	3	4	11	5	3	2	6	1	7	3	4	4	8	4	2	5	1	1	0	2	4	8	5	12	2	1	6	3	1	4	8	3	2	1	7	2	2	1	2	3	0.652015	0.712217	1.3906	1.07134	1.64894	0.48007	1.10731	0.175989
nucleic acid binding transcription factor activity	161	7	14	17	5	0	4	10	11	4	7	9	5	13	16	10	10	10	12	8	8	7	8	11	7	6	4	6	16	6	11	11	7	10	1	9	7	9	17	9	10	0.888252	1.4554	1.25476	0.625504	0	0.560579	1.07751	1.13026
nucleobase-containing compound transport	122	8	5	14	4	2	8	10	4	0	4	3	3	19	5	4	14	3	3	3	3	9	20	15	15	6	2	14	5	2	4	8	8	2	3	9	3	1	5	2	3	1.33966	0.685946	1.36366	0.660369	0.846995	1.47956	1.42196	0.542391
nucleobase-containing small molecule metabolic process	195	12	20	26	16	11	6	9	23	11	16	17	17	21	24	22	7	13	22	12	15	14	16	15	23	16	11	16	24	5	18	14	8	21	10	15	18	15	18	14	17	1.25722	1.71662	1.58444	1.65261	2.91453	0.694255	0.800674	1.95122
nucleolus	328	29	4	44	76	3	20	47	2	4	2	3	3	70	3	2	36	2	2	2	3	37	112	56	104	25	4	101	5	3	4	101	26	5	1	36	1	2	3	2	2	1.80629	0.204111	1.59411	4.66687	0.472561	1.37581	2.48583	0.100871
nucleotidyltransferase activity	76	6	2	13	12	0	2	4	2	3	1	1	1	4	2	2	4	2	2	1	1	2	14	5	19	4	1	15	2	0	2	15	2	2	1	7	1	2	2	2	1	1.61288	0.44045	2.03268	3.1802	0	0.593771	0.913049	0.43534
nucleus	2078	120	105	192	175	26	90	149	102	57	80	84	78	243	137	113	118	70	105	73	76	113	240	175	253	121	47	210	106	36	80	220	88	78	24	148	73	65	90	61	84	1.17978	0.845714	1.09798	1.69621	0.646455	0.977236	1.24391	0.81202
nucleus organization	64	4	0	7	4	1	3	4	4	3	0	0	0	5	3	3	2	0	4	4	0	5	6	8	5	6	0	6	0	0	0	4	2	0	0	5	3	0	0	0	0	1.27686	0	1.29974	1.25883	0.807292	1.05765	1.08425	1.03393
oligosaccharide metabolic process	35	3	9	1	1	0	1	2	5	1	9	8	8	2	11	8	2	3	8	6	5	3	1	2	1	1	4	1	11	6	5	1	1	4	1	2	5	9	5	9	9	1.75113	4.30382	0.339524	0.575464	0	0.644665	0.99131	2.36327
organelle assembly	119	7	0	9	12	0	1	8	2	2	0	0	0	16	2	0	15	4	1	2	0	8	21	16	23	9	0	25	2	1	0	20	2	4	1	16	3	0	3	0	0	1.20175	0	0.898739	2.03105	0	0.189607	1.16625	0.278032
organelle fission	285	10	9	18	7	3	9	6	11	12	8	8	9	23	13	9	9	12	12	8	8	9	8	13	18	15	2	8	9	3	11	9	9	8	1	13	8	8	13	7	13	0.716835	0.52854	0.750526	0.494697	0.54386	0.712525	0.36522	0.638499
organelle fusion	88	4	4	8	5	2	3	6	4	4	4	5	4	8	6	5	3	3	4	4	3	3	3	6	4	4	2	3	4	0	1	2	3	3	3	7	3	3	3	3	4	0.928627	0.760777	1.0803	1.14439	1.17424	0.769203	1.18281	0.751951
organelle inheritance	57	0	2	4	3	2	0	1	2	3	1	1	1	4	2	2	3	1	2	1	0	4	5	3	6	2	0	5	1	0	1	3	0	0	1	1	2	0	3	0	1	0	0.587266	0.833918	1.06007	1.81287	0	0.30435	0.580453
other	548	21	36	48	33	4	26	35	30	11	28	28	24	64	42	33	24	22	29	22	24	22	39	42	48	33	18	29	40	13	28	41	35	23	5	39	24	28	29	26	29	0.782894	1.09952	1.04088	1.21289	0.377129	1.07052	1.10799	0.905634
oxidoreductase activity	279	16	45	44	22	13	14	13	32	9	34	37	40	25	52	39	13	27	36	17	32	13	23	12	28	15	19	15	46	20	40	20	16	28	10	22	19	26	36	30	39	1.1716	2.69953	1.87407	1.5882	2.40741	1.13221	0.808327	1.8974
peptidase activity	93	2	6	7	2	2	2	4	5	2	4	4	4	8	6	6	3	1	6	1	2	2	5	3	2	6	0	5	5	2	8	5	3	2	1	6	5	4	3	4	5	0.439351	1.07981	0.894444	0.433145	1.11111	0.485232	0.746148	0.889404
peptidyl-amino acid modification	136	4	2	6	5	0	6	5	4	6	3	2	2	14	3	4	7	2	3	2	5	5	14	9	13	5	1	9	3	1	4	9	7	2	1	4	3	2	4	1	1	0.600876	0.246134	0.524265	0.740487	0	0.995439	0.637792	0.486557
peroxisome	71	1	12	3	2	1	1	3	12	2	5	6	7	3	12	8	1	14	9	5	6	0	2	3	1	3	7	3	13	3	13	3	1	13	1	2	8	5	12	4	7	0.287744	2.8288	0.502113	0.567359	0.7277	0.317793	0.733011	2.79599
peroxisome organization	68	1	3	3	2	0	0	3	3	1	3	3	3	2	5	3	1	6	3	2	3	1	2	3	2	3	3	4	5	2	6	3	2	6	0	3	3	2	6	1	3	0.300438	0.738401	0.524265	0.592389	0	0	0.76535	0.729835
phosphatase activity	94	7	6	14	6	1	2	4	2	0	7	5	6	7	4	3	2	3	4	2	5	5	6	8	17	3	7	4	7	1	1	6	6	3	0	3	1	6	2	6	4	1.52137	1.06832	1.76986	1.28561	0.549645	0.48007	0.73821	0.351977
plasma membrane	390	19	40	36	21	5	14	19	40	12	35	39	33	32	58	38	14	26	44	33	32	12	27	27	30	29	26	17	55	22	36	16	17	28	5	20	27	36	34	36	47	0.995298	1.71662	1.09692	1.08453	0.662393	0.809964	0.845156	1.69671
protein acylation	66	2	0	2	1	0	1	3	3	4	1	0	0	5	0	1	4	1	1	0	1	3	6	8	6	2	1	2	1	1	2	3	2	1	0	5	2	0	1	0	0	0.619085	0	0.360101	0.30517	0	0.341868	0.788542	0.751951
protein alkylation	49	2	2	2	3	0	2	1	4	1	3	3	3	5	3	3	2	2	4	4	4	2	7	2	7	3	3	7	4	1	3	7	3	3	1	0	3	3	2	2	1	0.833869	0.683146	0.485034	1.23314	0	0.920951	0.354039	1.35044
protein binding transcription factor activity	125	10	9	6	4	1	8	9	8	3	6	5	5	12	12	10	5	9	9	6	8	4	6	14	2	10	4	4	8	2	6	8	3	8	0	12	6	4	12	3	5	1.63438	1.20507	0.5704	0.64452	0.413333	1.44405	1.24905	1.05875
protein binding, bridging	56	5	2	4	2	1	3	4	1	1	2	2	2	8	3	2	3	2	1	0	1	1	3	7	3	4	0	2	2	0	2	4	4	0	3	5	2	0	3	0	1	1.82409	0.597753	0.84881	0.71933	0.922619	1.20875	1.23914	0.295409
protein complex biogenesis	331	19	8	24	12	9	10	15	18	13	5	6	4	27	21	17	14	13	18	10	9	11	20	22	26	17	5	19	16	4	9	17	9	13	7	16	13	9	16	7	8	1.17271	0.404522	0.861631	0.730196	1.40483	0.68167	0.78616	0.899615
protein dephosphorylation	43	4	0	6	3	1	0	1	1	1	0	0	0	5	2	1	1	1	1	1	1	3	3	5	8	2	0	3	0	0	0	3	2	0	1	2	0	0	0	0	0	1.90045	0	1.65814	1.4052	1.20155	0	0.40344	0.384719
protein folding	94	5	9	9	3	1	4	3	10	1	5	5	2	10	13	11	3	6	10	9	5	5	10	9	9	7	1	9	10	6	10	2	5	6	0	6	7	5	8	3	6	1.08669	1.60249	1.13777	0.642806	0.549645	0.96014	0.553657	1.75989
protein glycosylation	63	5	0	6	2	3	1	4	0	4	0	0	0	8	0	0	6	1	0	0	2	4	5	2	5	7	1	4	0	1	2	3	0	0	0	6	0	0	1	0	0	1.62141	0	1.13175	0.639405	2.46032	0.358147	1.10146	0
protein lipidation	44	1	0	0	2	1	0	1	1	0	1	0	0	2	0	0	0	0	0	0	1	1	2	3	2	0	1	1	0	2	1	3	2	0	0	2	0	0	0	0	1	0.464314	0	0	0.915511	1.17424	0	0.394271	0.375976
protein maturation	16	0	1	0	0	0	0	0	1	0	0	1	1	3	2	2	1	0	2	1	0	2	1	3	0	4	0	1	1	0	2	0	1	0	0	2	1	1	0	1	1	0	1.04607	0	0	0	0	0	1.03393
protein modification by small protein conjugation or removal	169	2	8	14	6	2	3	7	5	4	5	5	4	16	5	6	10	3	5	4	7	3	12	6	7	7	2	8	8	1	6	7	6	6	3	13	8	4	7	4	4	0.241773	0.792288	0.984418	0.715074	0.61144	0.400532	0.718553	0.489436
protein phosphorylation	188	3	10	12	7	3	3	8	14	5	5	7	5	14	12	9	7	5	10	8	10	9	9	11	10	11	7	6	10	2	5	7	6	8	2	7	9	6	6	8	5	0.326007	0.890271	0.758511	0.74994	0.824468	0.360053	0.73821	1.23192
protein targeting	281	14	10	26	10	3	11	19	13	3	9	11	10	25	12	9	8	10	9	9	9	17	22	21	31	11	6	20	13	7	12	13	11	8	0	19	12	8	15	4	9	1.01785	0.595626	1.09953	0.71677	0.551601	0.883261	1.17299	0.765331
protein transporter activity	52	4	1	8	3	0	2	6	0	0	1	1	2	4	0	0	0	1	0	0	3	5	4	6	11	1	1	3	3	3	1	4	3	0	0	6	1	0	4	0	0	1.57152	0.321867	1.82821	1.16199	0	0.867819	2.00168	0
proteolysis involved in cellular protein catabolic process	234	11	10	10	5	8	6	7	7	6	4	4	3	17	12	10	7	4	9	5	6	8	9	9	9	10	2	7	5	4	4	4	2	3	6	7	9	4	7	3	5	0.960375	0.71526	0.507835	0.430368	1.76638	0.578546	0.518955	0.494874
pseudohyphal growth	75	2	10	3	0	0	0	0	6	3	7	6	5	9	9	5	2	4	6	4	4	4	4	4	3	6	3	3	6	2	6	4	1	6	1	3	3	6	7	5	7	0.544795	2.23161	0.475333	0	0	0	0	1.32343
regulation of cell cycle	192	9	6	16	3	3	5	8	9	5	2	4	2	21	9	8	8	7	10	8	4	8	10	12	15	14	3	9	5	3	6	4	6	5	2	10	6	2	8	3	4	0.957647	0.523034	0.990278	0.314707	0.807292	0.587586	0.72283	0.77545
regulation of DNA metabolic process	102	7	4	7	3	3	2	4	5	3	1	1	1	10	7	7	2	4	7	3	3	4	8	7	4	4	1	4	4	0	4	6	5	4	0	4	4	2	4	2	3	1.40205	0.656356	0.815523	0.592389	1.51961	0.442417	0.680311	0.810928
regulation of organelle organization	279	12	10	18	7	3	7	9	17	7	7	8	6	22	17	15	12	13	17	14	11	7	14	22	19	10	6	11	15	7	12	9	6	11	5	11	13	9	16	4	10	0.878701	0.599896	0.766667	0.505336	0.555556	0.566104	0.559611	1.00799
regulation of protein modification process	94	3	5	9	2	3	4	5	6	2	3	4	3	8	5	4	7	3	4	4	6	5	7	8	8	3	5	3	6	1	2	3	3	1	3	5	4	3	4	4	3	0.652015	0.890271	1.13777	0.428537	1.64894	0.96014	0.922762	1.05593
regulation of translation	93	7	5	8	6	0	5	10	7	2	2	1	0	15	7	6	11	2	7	6	1	6	21	17	12	7	2	17	2	4	3	5	3	3	1	7	3	1	3	2	1	1.53773	0.899844	1.02222	1.29944	0	1.21308	1.86537	1.24517
regulation of transport	89	2	1	10	6	2	0	3	5	3	1	2	2	8	7	5	3	3	6	5	3	3	7	9	6	8	2	4	5	2	2	3	3	2	1	2	4	2	4	2	3	0.459097	0.188057	1.33521	1.35784	1.16105	0	0.584762	0.929378
response to chemical	394	12	40	33	21	6	12	21	35	14	32	32	33	34	54	38	15	27	37	25	25	12	25	26	22	37	18	16	40	22	28	24	16	21	7	23	29	23	34	23	31	0.622227	1.6992	0.995305	1.07352	0.786802	0.687207	0.924636	1.46955
response to heat	69	3	13	4	2	3	3	4	14	3	7	8	5	4	15	14	4	4	14	13	5	8	5	3	5	3	4	7	10	7	7	5	3	4	0	7	15	9	6	9	11	0.888252	3.15336	0.688889	0.583804	2.24638	0.981013	1.00568	3.35654
response to osmotic stress	91	3	12	9	3	3	2	5	9	4	7	8	6	13	13	10	7	5	10	7	8	8	9	3	7	4	8	5	11	4	7	4	3	7	2	7	7	7	7	7	10	0.67351	2.20709	1.17527	0.663997	1.7033	0.495897	0.953183	1.63611
response to oxidative stress	99	4	18	4	7	2	4	4	19	6	11	12	14	6	26	19	4	10	20	15	8	3	5	5	4	4	7	5	14	12	12	7	4	5	2	4	16	10	12	12	14	0.825446	3.04311	0.480135	1.42413	1.04377	0.911648	0.700927	3.1749
response to starvation	101	5	10	9	4	4	1	4	7	1	5	7	4	11	11	9	3	4	9	5	4	5	9	7	6	5	3	8	8	5	8	3	3	5	1	6	5	8	6	9	9	1.01138	1.65714	1.05891	0.797673	2.0462	0.223399	0.687047	1.14654
ribosomal large subunit biogenesis	98	8	1	11	31	1	4	9	0	0	0	0	0	19	1	1	13	0	0	0	0	13	42	15	35	15	0	46	1	0	0	46	3	1	0	17	0	0	0	0	0	1.66774	0.170787	1.33384	6.37121	0.527211	0.920951	1.59318	0
ribosomal small subunit biogenesis	133	11	1	12	37	0	7	12	0	0	1	1	1	28	1	0	26	0	0	0	0	16	49	22	43	17	0	48	1	0	0	48	9	0	0	15	0	0	0	0	1	1.68968	0.125843	1.07218	5.6032	0	1.18754	1.56523	0
ribosomal subunit export from nucleus	46	5	1	4	14	0	1	2	0	0	1	0	0	10	1	0	1	0	0	0	1	5	18	5	8	4	0	15	1	0	1	17	2	0	0	3	0	0	1	0	1	2.22063	0.36385	1.03333	6.12994	0	0.490506	0.754258	0
ribosome	350	28	15	38	28	5	15	23	16	3	12	10	9	62	22	20	74	8	16	14	10	29	53	49	44	38	6	58	13	8	12	31	23	7	4	48	4	5	12	5	7	1.63438	0.717304	1.29019	1.6113	0.738095	0.966998	1.14001	0.756248
ribosome assembly	56	6	0	7	12	0	1	7	0	0	0	0	0	9	0	0	13	0	0	0	0	6	17	12	19	6	0	21	0	0	0	17	1	0	0	10	0	0	0	0	0	2.18891	0	1.48542	4.31598	0	0.402916	2.16849	0
RNA binding	748	28	15	62	52	12	49	68	13	8	7	9	9	106	20	18	56	12	15	12	9	65	98	71	95	66	11	100	21	9	14	71	42	15	18	54	7	8	17	10	14	0.764752	0.335637	0.984982	1.40019	0.828877	1.47808	1.57708	0.287511
RNA catabolic process	122	3	5	8	12	3	4	5	5	3	2	3	3	13	8	6	5	4	6	4	5	5	14	7	15	5	4	15	8	3	5	14	7	7	1	9	4	2	7	3	4	0.502372	0.685946	0.779235	1.98111	1.27049	0.73978	0.710981	0.677989
RNA modification	169	20	3	26	18	0	12	24	1	2	2	2	2	37	3	2	21	3	1	1	2	23	31	29	40	23	3	31	4	2	1	24	17	2	0	22	1	0	2	0	1	2.41773	0.297108	1.82821	2.14522	0	1.60213	2.46361	0.0978871
RNA modification guide activity	71	10	0	15	5	0	6	19	0	0	0	0	0	26	0	0	16	0	0	0	0	13	13	20	11	12	1	11	1	0	0	3	7	1	0	15	0	0	0	0	0	2.87744	0	2.51056	1.4184	0	1.90676	4.6424	0
RNA splicing	142	6	2	11	7	0	5	8	1	1	2	1	1	11	2	2	9	1	1	0	2	5	13	10	14	4	2	8	5	2	1	9	5	2	2	7	0	1	1	1	2	0.863231	0.235734	0.92054	0.992878	0	0.794482	0.977348	0.116499
rRNA binding	101	12	0	16	11	1	6	21	0	0	0	0	0	32	0	0	22	0	0	0	0	15	20	25	17	12	1	21	1	0	0	13	11	1	0	17	0	0	1	0	0	2.4273	0	1.88251	2.1936	0.511551	1.34039	3.607	0
rRNA processing	305	32	4	39	65	3	19	43	1	1	2	3	3	71	3	1	45	0	1	1	0	36	98	54	87	36	1	93	3	1	2	83	24	3	0	35	1	1	2	1	2	2.14345	0.219503	1.51951	4.2924	0.508197	1.40558	2.44577	0.0542391
signal transducer activity	34	2	2	3	0	1	0	3	1	3	2	2	2	1	1	0	3	1	0	1	2	3	5	2	4	7	1	3	2	0	1	1	2	2	0	2	1	0	1	0	1	1.20175	0.984535	1.04853	0	1.51961	0	1.5307	0.486557
signaling	239	10	9	18	9	4	7	11	14	9	6	8	8	23	14	11	16	8	12	9	13	14	19	19	14	22	11	12	15	2	8	10	14	14	4	14	11	6	8	5	9	0.854803	0.630267	0.894979	0.758457	0.864714	0.66085	0.79844	0.969042
site of polarized growth	247	13	6	24	7	5	3	9	9	12	2	1	2	26	11	8	11	9	11	9	3	7	17	15	19	28	5	11	8	2	8	7	11	5	6	18	7	2	9	1	2	1.07525	0.406569	1.15466	0.570804	1.04588	0.274048	0.632111	0.602779
snoRNA processing	43	1	3	4	5	1	2	2	1	2	1	2	2	4	2	1	3	1	1	1	0	2	6	1	8	0	0	4	1	2	3	5	2	3	0	4	1	1	3	1	1	0.475112	1.1677	1.10543	2.342	1.20155	1.04946	0.806881	0.384719
sporulation	137	8	10	9	4	2	6	7	10	5	7	8	5	12	13	10	3	8	11	8	12	6	5	7	6	4	4	4	10	7	8	6	4	8	3	6	10	8	8	5	8	1.19298	1.22169	0.780657	0.588065	0.754258	0.988173	0.886391	1.20751
structural constituent of ribosome	222	14	7	25	8	2	10	17	6	2	7	4	3	43	7	7	62	2	5	5	3	18	11	31	20	33	2	21	5	4	7	10	18	1	3	29	1	0	3	1	3	1.28837	0.527746	1.33821	0.725811	0.465465	1.01636	1.32845	0.447106
structural molecule activity	343	17	15	29	8	5	13	22	15	7	13	11	8	47	14	13	64	8	13	11	8	20	17	37	28	35	8	26	11	6	13	13	19	4	6	33	6	4	11	4	10	1.01256	0.731943	1.00471	0.469767	0.753158	0.855168	1.1127	0.723451
telomere organization	76	1	2	3	2	2	4	6	2	9	1	0	0	7	2	1	4	1	2	2	0	3	4	4	5	4	0	2	1	0	1	2	0	1	5	6	2	1	2	0	1	0.268813	0.44045	0.469079	0.530033	1.35965	1.18754	1.36957	0.43534
transcription factor binding	69	4	7	5	0	1	1	2	6	2	6	6	6	9	9	8	5	9	6	4	7	4	9	6	2	4	4	1	6	1	6	4	1	8	0	8	3	5	11	5	7	1.18434	1.69797	0.861111	0	0.748792	0.327004	0.502839	1.43852
transcription from RNA polymerase I promoter	64	7	0	8	10	0	3	7	0	0	0	0	0	6	0	0	7	1	0	0	0	4	15	6	14	2	0	15	0	0	0	13	3	1	1	6	0	0	2	0	0	2.23451	0	1.48542	3.14707	0	1.05765	1.89743	0
transcription from RNA polymerase II promoter	484	34	30	48	25	6	25	41	22	16	20	22	18	44	35	28	23	28	26	17	26	27	36	45	28	37	13	26	38	10	23	36	20	24	8	37	15	20	37	19	27	1.43515	1.03742	1.17851	1.04035	0.640496	1.16546	1.46956	0.751951
transcription from RNA polymerase III promoter	40	3	1	6	6	0	2	3	0	2	1	1	1	4	1	1	2	1	0	0	2	0	7	2	10	2	0	6	0	0	0	8	0	0	0	3	0	1	1	0	0	1.53223	0.418427	1.7825	3.02119	0	1.12816	1.30109	0
transferase activity	783	48	47	85	51	10	29	42	54	20	43	42	42	94	59	53	38	31	48	34	42	40	78	66	100	50	27	63	50	16	36	63	42	40	8	63	38	31	39	35	41	1.2524	1.00465	1.29002	1.31188	0.659855	0.835677	0.93054	1.14089
transferase activity, transferring glycosyl groups	96	7	8	11	8	3	3	10	8	4	8	8	8	14	10	10	5	2	10	8	8	6	9	5	13	7	7	6	9	3	7	10	4	4	0	9	5	7	3	7	8	1.48967	1.39476	1.36163	1.67844	1.61458	0.705103	1.80708	1.37858
translation factor activity, nucleic acid binding	43	4	1	6	4	0	2	5	1	0	0	0	0	9	2	2	5	1	2	2	0	7	21	8	16	5	1	20	1	1	1	5	6	1	0	5	0	1	1	1	1	1.90045	0.389235	1.65814	1.8736	0	1.04946	2.0172	0.384719
translational elongation	325	1	7	16	4	10	24	28	7	4	4	4	3	28	11	9	14	4	10	8	2	17	17	25	7	27	2	14	4	4	6	5	12	2	17	11	2	4	6	5	6	0.0628609	0.360491	0.585026	0.247892	1.58974	1.66621	1.49459	0.356309
translational initiation	61	4	6	6	4	1	5	6	3	0	2	2	2	11	6	5	3	2	3	2	1	11	18	7	14	10	2	15	3	1	4	4	7	2	0	5	1	1	3	2	3	1.33966	1.64627	1.16885	1.32074	0.846995	1.84945	1.70635	0.813586
transmembrane transport	227	10	15	29	9	8	6	11	12	5	13	16	13	18	17	10	7	10	12	11	12	9	16	17	23	11	13	13	20	10	10	11	11	13	5	14	8	12	16	10	13	0.899991	1.10598	1.51814	0.798551	1.82085	0.596387	0.840649	0.874516
transmembrane transporter activity	317	11	29	29	12	14	8	8	19	7	24	25	22	22	29	17	8	15	16	14	18	9	13	17	23	12	19	9	38	21	20	8	13	17	13	8	13	17	25	18	22	0.70892	1.53115	1.08712	0.762445	2.28181	0.569421	0.437803	0.991532
transposition	20	2	2	1	0	1	0	0	0	0	1	1	1	1	1	1	0	1	0	0	1	1	2	1	1	3	0	2	2	0	0	0	0	0	0	0	0	1	0	0	0	2.04298	1.67371	0.594167	0	2.58333	0	0	0
triplet codon-amino acid adaptor activity	297	1	3	13	1	11	24	24	2	4	2	3	3	23	5	4	5	2	4	2	2	18	3	15	3	23	1	4	4	1	4	3	12	0	17	7	0	3	4	4	5	0.0687872	0.169062	0.520146	0.0678156	1.91358	1.8233	1.40185	0.1114
tRNA aminoacylation for protein translation	36	4	1	10	3	0	2	6	1	1	0	0	0	5	1	1	6	0	1	1	0	9	13	2	10	6	0	13	0	0	0	3	3	0	0	7	0	1	0	1	1	2.26998	0.464919	3.30093	1.67844	0	1.25352	2.89132	0.459526
tRNA processing	104	7	5	11	13	1	5	2	1	6	3	4	4	5	4	2	3	4	1	1	2	7	13	9	24	9	2	13	3	3	3	19	6	3	1	7	1	1	4	1	2	1.37508	0.804668	1.25689	2.51766	0.496795	1.08477	0.333614	0.159067
ubiquitin-like protein binding	43	3	2	3	0	1	2	2	2	0	1	1	1	6	3	2	2	0	2	2	0	1	1	1	2	1	0	1	2	0	1	0	2	0	1	4	3	0	2	0	1	1.42533	0.778469	0.82907	0	1.20155	1.04946	0.806881	0.769438
unfolded protein binding	67	6	6	7	7	1	2	4	8	1	4	5	3	7	12	8	3	3	7	6	4	4	10	7	8	7	1	9	7	3	7	5	3	4	0	8	6	4	5	3	6	1.82953	1.49884	1.24154	2.10431	0.771144	0.673531	1.0357	1.97527
vacuole	274	13	18	22	11	6	3	6	16	6	18	19	18	23	26	23	11	12	19	15	13	13	9	13	12	7	11	8	18	10	18	10	9	13	3	11	16	11	10	11	18	0.969297	1.09952	0.954136	0.80859	1.13139	0.247043	0.379882	0.96601
vacuole organization	77	3	4	9	0	1	1	4	5	2	4	4	4	8	5	6	3	2	5	3	3	3	3	5	3	3	2	3	4	1	2	1	4	3	1	5	4	3	3	3	5	0.795966	0.869459	1.38896	0	0.670996	0.29303	0.901191	1.07422
vesicle organization	72	1	2	5	1	3	3	3	3	2	1	2	1	3	5	4	2	2	4	2	2	1	2	1	4	1	2	1	2	1	1	1	0	1	0	4	0	2	2	2	1	0.283747	0.464919	0.825231	0.279739	2.15278	0.940137	0.72283	0.689288
vitamin metabolic process	44	1	3	4	1	2	1	0	2	2	4	3	3	3	0	0	0	2	0	0	4	3	3	2	6	2	2	3	3	2	4	2	1	4	2	5	0	4	4	3	4	0.464314	1.14117	1.0803	0.457756	2.34848	0.512802	0	0.751951
[truncated: 112 more columns]
