# Supplementary material for: Msn2/4 regulate expression of glycolytic enzymes and control transition from quiescence to growth
Source: eLife. 2017 Sep 26;6:e29938. doi: 10.7554/eLife.29938 (PMC5634782; doi:10.7554/eLife.29938)
Supplement: Figure 2—source data 1. [file elife-29938-fig2-data1.xlsx]

## Sheet: Sheet1
chrI	42571	44721
chrI	45170	45420
chrI	68170	68520
chrI	68720	68920
chrI	71220	71470
chrI	72020	73320
chrI	73421	73571
chrI	92571	92771
chrI	131470	131970
chrI	132120	132270
chrI	139120	141320
chrI	141620	141870
chrI	142670	143720
chrI	151370	151721
chrI	166270	166421
chrI	170270	170670
chrI	189820	190321
chrII	-30	221
chrII	1020	1171
chrII	5370	5921
chrII	36421	36571
chrII	37321	38671
chrII	38921	39221
chrII	84270	86070
chrII	88271	88421
chrII	134021	134821
chrII	137771	137971
chrII	140520	140720
chrII	159770	159971
chrII	162471	163821
chrII	165120	165371
chrII	169321	169671
chrII	193671	193921
chrII	194771	196021
chrII	217170	217320
chrII	237170	237320
chrII	238271	238421
chrII	278571	278821
chrII	341620	341821
chrII	343220	344320
chrII	360370	360520
chrII	371670	372670
chrII	372920	373620
chrII	376070	376220
chrII	381120	381820
chrII	382020	383020
chrII	394221	394621
chrII	395121	395521
chrII	408621	408821
chrII	413970	414320
chrII	419370	419870
chrII	452220	452471
chrII	466220	466520
chrII	477770	479371
chrII	504520	504721
chrII	544571	544821
chrII	614120	614270
chrII	636471	636971
chrII	637271	637471
chrII	680321	681670
chrII	760920	761071
chrII	789571	792021
chrII	802571	803221
chrII	803470	804070
chrII	804121	804370
chrII	804670	805170
chrII	806170	806420
chrIII	-30	520
chrIII	50570	50770
chrIII	51270	52320
chrIII	76020	77570
chrIII	78520	78670
chrIII	90720	91170
chrIII	91370	93170
chrIII	107320	107470
chrIII	114320	114620
chrIII	120620	120770
chrIII	120920	121870
chrIII	122620	122770
chrIII	123520	123720
chrIII	133420	133670
chrIII	137270	137520
chrIII	137870	139020
chrIII	139170	139320
chrIII	162170	162370
chrIII	163570	163770
chrIII	177270	177420
chrIII	177520	177670
chrIII	236470	236670
chrIII	238720	238870
chrIII	246720	246870
chrIII	262720	262920
chrIII	306220	306470
chrIII	306820	306970
chrIII	316370	316570
chrIV	-30	220
chrIV	42420	42570
chrIV	44720	45820
chrIV	60670	61520
chrIV	76770	77020
chrIV	98220	98370
chrIV	132820	133170
chrIV	134120	135020
chrIV	156070	156220
chrIV	229520	229670
chrIV	234370	234570
chrIV	264220	264370
chrIV	309520	309670
chrIV	322820	323270
chrIV	366220	366520
chrIV	368770	369070
chrIV	381970	385370
chrIV	412570	412920
chrIV	416970	417170
chrIV	449620	449920
chrIV	461870	462420
chrIV	465120	465570
chrIV	472620	472770
chrIV	508370	509170
chrIV	538820	539070
chrIV	555820	556070
chrIV	556670	556820
chrIV	580220	580420
chrIV	591670	591920
chrIV	593370	593620
chrIV	599720	600220
chrIV	600870	602320
chrIV	635870	636020
chrIV	636220	636520
chrIV	721820	722070
chrIV	722520	722720
chrIV	757820	757970
chrIV	765370	765520
chrIV	768270	768620
chrIV	806270	806470
chrIV	807220	807370
chrIV	893820	894420
chrIV	915620	915920
chrIV	930670	930820
chrIV	955120	955520
chrIV	972320	972720
chrIV	972970	973220
chrIV	974420	974570
chrIV	976320	976820
chrIV	992770	992920
chrIV	1013820	1014020
chrIV	1016070	1016320
chrIV	1080520	1080770
chrIV	1154220	1155770
chrIV	1156220	1156720
chrIV	1157170	1157570
chrIV	1159120	1161220
chrIV	1161620	1162570
chrIV	1164820	1165320
chrIV	1229270	1229470
chrIV	1233720	1234020
chrIV	1237170	1237520
chrIV	1237670	1237970
chrIV	1238120	1238520
chrIV	1241270	1241670
chrIV	1242320	1242620
chrIV	1270520	1270670
chrIV	1270820	1270970
chrIV	1277370	1277520
chrIV	1278670	1278920
chrIV	1345470	1345720
chrIV	1385470	1385820
chrIV	1434420	1434570
chrIV	1443770	1444220
chrIV	1444420	1444720
chrIV	1452670	1454070
chrIV	1468820	1468970
chrIV	1490070	1490470
chrIV	1495720	1495870
chrIV	1507370	1507520
chrIV	1525570	1525820
chrIV	1526970	1527770
chrIV	1528170	1528320
chrIX	-30	770
chrIX	4070	4470
chrIX	4770	5070
chrIX	6570	6920
chrIX	18870	19120
chrIX	23420	23820
chrIX	24220	24970
chrIX	25220	25970
chrIX	27620	28770
chrIX	33020	33220
chrIX	36870	37020
chrIX	113370	113520
chrIX	125420	125670
chrIX	127820	127970
chrIX	130020	130220
chrIX	139270	139420
chrIX	174920	175070
chrIX	177620	177770
chrIX	186170	186320
chrIX	186520	186870
chrIX	220820	221070
chrIX	221270	221620
chrIX	248870	249420
chrIX	254520	254670
chrIX	255170	256370
chrIX	317770	317920
chrIX	324220	324420
chrIX	355720	355870
chrIX	382270	382620
chrIX	383070	383670
chrIX	394820	394970
chrIX	407970	408120
chrIX	419670	419920
chrM	13920	14370
chrM	16470	16920
chrM	20570	20720
chrM	60520	60720
chrM	63520	63670
chrM	79470	79920
chrV	320	472
chrV	33770	33970
chrV	42072	42370
chrV	51920	52070
chrV	61770	61970
chrV	82720	82870
chrV	85020	85470
chrV	85770	86720
chrV	117820	117970
chrV	123170	123472
chrV	135370	135520
chrV	138620	139720
chrV	141170	141370
chrV	152020	152220
chrV	212120	212320
chrV	225470	225622
chrV	242070	242320
chrV	256470	256620
chrV	260320	260970
chrV	264222	265370
chrV	266820	267020
chrV	267170	267320
chrV	267720	267870
chrV	299620	299970
chrV	301120	301320
chrV	335570	335770
chrV	339320	342070
chrV	442020	442370
chrV	461970	462122
chrV	467970	468172
chrV	522770	522922
chrV	545272	545422
chrV	559120	559272
chrV	569822	569972
chrV	570172	570772
chrV	576670	576822
chrVI	4071	4922
chrVI	19620	19770
chrVI	22920	23070
chrVI	55020	55270
chrVI	74820	74972
chrVI	76570	76720
chrVI	82970	84370
chrVI	106570	106870
chrVI	107270	107620
chrVI	107820	108170
chrVI	213720	216770
chrVI	223272	223472
chrVI	224920	225470
chrVI	233672	233870
chrVI	253570	254220
chrVI	255320	255820
chrVII	67270	67420
chrVII	84370	84520
chrVII	95520	95720
chrVII	149270	149420
chrVII	166020	166320
chrVII	197270	197570
chrVII	206520	206670
chrVII	208720	208870
chrVII	229870	230120
chrVII	271370	271570
chrVII	272020	272170
chrVII	278470	278670
chrVII	311570	312270
chrVII	323420	323970
chrVII	324720	324920
chrVII	346320	346620
chrVII	366220	366370
chrVII	384720	384970
chrVII	386020	386620
chrVII	386970	388720
chrVII	398120	398270
chrVII	398920	400220
chrVII	400420	400570
chrVII	428220	428370
chrVII	472520	472670
chrVII	476020	476370
chrVII	479120	482670
chrVII	483320	483870
chrVII	496770	496920
chrVII	516370	516520
chrVII	528670	528820
chrVII	557720	557920
chrVII	592520	593020
chrVII	598920	599070
chrVII	599820	601020
chrVII	609820	610020
chrVII	611870	612020
chrVII	617770	619220
chrVII	625170	625570
chrVII	649670	650120
chrVII	650770	650970
chrVII	654120	654270
chrVII	731170	731570
chrVII	766270	766570
chrVII	772070	772220
chrVII	773220	773570
chrVII	785520	785820
chrVII	809670	810020
chrVII	836870	837020
chrVII	858370	859070
chrVII	882420	883820
chrVII	884020	884220
chrVII	905420	905670
chrVII	908020	908220
chrVII	908370	908620
chrVII	914970	915120
chrVII	960370	961620
chrVII	976970	977120
chrVII	986870	987420
chrVII	993970	994270
chrVII	1000470	1000720
chrVII	1001170	1002470
chrVII	1011270	1011420
chrVII	1026720	1026870
chrVII	1052320	1052470
chrVII	1063570	1063720
chrVII	1064420	1064870
chrVII	1065170	1065370
chrVII	1065720	1065920
chrVII	1076120	1076420
chrVII	1084420	1084670
chrVII	1090720	1090920
chrVIII	-30	270
chrVIII	17020	17170
chrVIII	17570	18020
chrVIII	18170	18420
chrVIII	26920	28070
chrVIII	34470	35720
chrVIII	48070	48370
chrVIII	50770	50920
chrVIII	56020	56220
chrVIII	72170	72570
chrVIII	105320	105770
chrVIII	120420	120820
chrVIII	122320	122670
chrVIII	122920	123320
chrVIII	212470	212670
chrVIII	214270	214670
chrVIII	214870	215020
chrVIII	273670	273820
chrVIII	281020	281370
chrVIII	289120	289620
chrVIII	292920	293870
chrVIII	295220	295820
chrVIII	296920	297120
chrVIII	375420	375770
chrVIII	381670	382170
chrVIII	396920	397070
chrVIII	401070	401270
chrVIII	411370	411570
chrVIII	450870	451020
chrVIII	451520	453070
chrVIII	455670	455820
chrVIII	462120	462270
chrVIII	462870	463670
chrVIII	471620	471920
chrVIII	472170	472370
chrVIII	488370	488520
chrVIII	512170	512370
chrVIII	531620	531770
chrVIII	540820	541020
chrVIII	553620	554020
chrVIII	554370	554720
chrVIII	555070	555570
chrVIII	555620	556020
chrVIII	556770	557320
chrVIII	559120	559270
chrVIII	562170	562620
chrX	-30	720
chrX	4170	4320
chrX	4770	4920
chrX	6570	6870
chrX	18820	19120
chrX	22820	22970
chrX	26270	26670
chrX	36620	36920
chrX	74220	74720
chrX	120620	122320
chrX	123120	123270
chrX	136270	136420
chrX	139120	139870
chrX	150620	150770
chrX	159220	159370
chrX	159620	159770
chrX	160020	160170
chrX	227920	228070
chrX	233770	234120
chrX	289770	290320
chrX	291170	291320
chrX	337670	337970
chrX	338520	339270
chrX	348820	349120
chrX	374420	374570
chrX	436120	436520
chrX	453520	454370
chrX	456770	457820
chrX	457970	458170
chrX	471820	471970
chrX	519670	520820
chrX	520870	521020
chrX	577220	577420
chrX	578670	578820
chrX	606020	607070
chrX	608820	609220
chrX	622520	622770
chrX	623120	623320
chrX	639370	639670
chrX	646670	646820
chrX	647720	649220
chrX	649370	649770
chrX	652420	652570
chrX	664070	664570
chrX	678570	678820
chrX	679070	682670
chrX	745520	745720
chrXI	-30	220
chrXI	20670	21020
chrXI	21470	21970
chrXI	22270	24470
chrXI	68470	68920
chrXI	91820	92120
chrXI	92470	92620
chrXI	99820	100070
chrXI	101120	101970
chrXI	102220	106820
chrXI	127120	127320
chrXI	163320	164070
chrXI	164570	164720
chrXI	169220	170570
chrXI	202570	202720
chrXI	216470	216720
chrXI	230620	231220
chrXI	232470	233470
chrXI	247520	247720
chrXI	258270	258520
chrXI	279420	280020
chrXI	280170	280420
chrXI	283520	283770
chrXI	307770	307920
chrXI	322170	322370
chrXI	325670	326970
chrXI	327370	327570
chrXI	334070	334270
chrXI	381820	381970
chrXI	382420	383770
chrXI	384870	385020
chrXI	393120	393320
chrXI	406770	406920
chrXI	438020	438320
chrXI	438470	438670
chrXI	439570	439920
chrXI	515020	516570
chrXI	516720	517070
chrXI	517470	517620
chrXI	518570	518820
chrXI	519320	520670
chrXI	558420	558720
chrXI	572620	572770
chrXI	580620	581020
chrXI	589570	589820
chrXI	591170	591320
chrXI	608170	608320
chrXI	614570	614770
chrXI	630220	630370
chrXI	666270	666420
chrXII	22	274
chrXII	5722	5872
chrXII	11071	11372
chrXII	29421	29674
chrXII	63822	64121
chrXII	64521	64671
chrXII	65521	65721
chrXII	84121	84471
chrXII	88272	88422
chrXII	89021	90424
chrXII	90571	91321
chrXII	95572	97221
chrXII	108421	108572
chrXII	125122	125274
chrXII	164122	164272
chrXII	199272	199722
chrXII	232421	233874
chrXII	253221	253474
chrXII	257672	259024
chrXII	324722	326622
chrXII	329421	329622
chrXII	369021	369521
chrXII	369672	369924
chrXII	370521	370871
chrXII	449521	449871
chrXII	451471	468925
chrXII	472471	472622
chrXII	482022	482174
chrXII	485672	485822
chrXII	489322	489474
chrXII	489872	490475
chrXII	499272	499672
chrXII	500471	500621
chrXII	516072	516372
chrXII	516672	516824
chrXII	589072	589224
chrXII	637124	639924
chrXII	640074	640224
chrXII	704521	704671
chrXII	721622	721772
chrXII	723371	723521
chrXII	732772	734522
chrXII	734772	736972
chrXII	782722	783321
chrXII	783621	783821
chrXII	794022	794272
chrXII	837572	839024
chrXII	921471	921674
chrXII	1064922	1065271
chrXII	1071372	1071774
chrXII	1073622	1073772
chrXIII	20	470
chrXIII	5420	5670
chrXIII	27720	28420
chrXIII	28620	28870
chrXIII	69770	69970
chrXIII	70270	70520
chrXIII	87170	90220
chrXIII	91170	91320
chrXIII	158420	158620
chrXIII	162270	162670
chrXIII	165570	166720
chrXIII	209170	209320
chrXIII	220970	221120
chrXIII	236320	236470
chrXIII	253320	253620
chrXIII	267920	268270
chrXIII	282920	283170
chrXIII	287420	287820
chrXIII	297570	298820
chrXIII	302920	303070
chrXIII	306170	306820
chrXIII	334920	335070
chrXIII	347220	347370
chrXIII	353220	353370
chrXIII	408370	408720
chrXIII	432020	432220
chrXIII	472920	473170
chrXIII	482570	482720
chrXIII	483120	483320
chrXIII	483520	483670
chrXIII	499070	499270
chrXIII	499470	500220
chrXIII	507020	507270
chrXIII	507470	508720
chrXIII	510970	511120
chrXIII	511770	512070
chrXIII	540270	540820
chrXIII	552970	553120
chrXIII	554270	554420
chrXIII	554820	555970
chrXIII	556970	557320
chrXIII	605820	605970
chrXIII	609820	610270
chrXIII	626820	627020
chrXIII	632770	634770
chrXIII	652420	653220
chrXIII	653570	653720
chrXIII	661770	661970
chrXIII	675220	675370
chrXIII	751370	751570
chrXIII	752770	753370
chrXIII	758520	758670
chrXIII	761620	762220
chrXIII	774120	774570
chrXIII	774920	775070
chrXIII	861220	861370
chrXIII	872720	873820
chrXIII	879220	879470
chrXIII	880570	880720
chrXIII	888020	888720
chrXIII	895570	895720
chrXIII	901370	901570
chrXIII	923270	923420
chrXIII	924070	924420
chrXIV	-30	271
chrXIV	421	571
chrXIV	3820	4020
chrXIV	6320	6821
chrXIV	25970	26270
chrXIV	26620	26920
chrXIV	65271	65421
chrXIV	87470	87671
chrXIV	88621	88771
chrXIV	89121	89821
chrXIV	91570	91720
chrXIV	96221	96371
chrXIV	117571	118821
chrXIV	119071	119221
chrXIV	187770	187921
chrXIV	197920	198370
chrXIV	217370	217620
chrXIV	252670	253020
chrXIV	253170	253370
chrXIV	273920	274070
chrXIV	301070	301570
chrXIV	301820	302120
chrXIV	303170	303670
chrXIV	310220	310421
chrXIV	335870	336120
chrXIV	337170	337620
chrXIV	349970	350221
chrXIV	352521	353021
chrXIV	355370	355771
chrXIV	357621	359271
chrXIV	360270	360570
chrXIV	372220	372720
chrXIV	373720	374020
chrXIV	392420	392621
chrXIV	405670	405971
chrXIV	414070	414970
chrXIV	415270	416270
chrXIV	427120	427370
chrXIV	493921	494071
chrXIV	499970	500821
chrXIV	503220	503471
chrXIV	517521	518271
chrXIV	557971	558221
chrXIV	559420	559621
chrXIV	560220	560821
chrXIV	575170	575320
chrXIV	586121	586571
chrXIV	604970	605170
chrXIV	618321	619320
chrXIV	628671	629021
chrXIV	629221	630771
chrXIV	632571	633670
chrXIV	652070	652220
chrXIV	655120	655421
chrXIV	656321	656721
chrXIV	656920	657070
chrXIV	657721	658321
chrXIV	658621	658821
chrXIV	659121	659271
chrXIV	659571	659821
chrXIV	660521	660671
chrXIV	662120	662420
chrXIV	663870	664121
chrXIV	714470	714770
chrXIV	716221	716421
chrXIV	731571	732171
chrXIV	733470	733920
chrXIV	735321	735721
chrXIV	735921	736071
chrXIV	750020	750170
chrXIV	757120	757270
chrXIV	757470	757620
chrXIV	784020	784321
chrXV	-30	120
chrXV	24670	24870
chrXV	28720	31470
chrXV	31620	32220
chrXV	32270	33870
chrXV	80970	81120
chrXV	81320	81520
chrXV	83270	83420
chrXV	87920	88370
chrXV	93070	93270
chrXV	93470	93820
chrXV	109320	109970
chrXV	110420	110620
chrXV	110870	111070
chrXV	159320	160220
chrXV	161120	161320
chrXV	161770	161920
chrXV	216420	216670
chrXV	220320	220520
chrXV	231120	231270
chrXV	231470	231620
chrXV	232120	232270
chrXV	285620	285770
chrXV	312670	312820
chrXV	381820	382770
chrXV	382970	383170
chrXV	383320	383470
chrXV	391620	392120
chrXV	407670	407820
chrXV	417920	418070
chrXV	424270	424620
chrXV	426270	426470
chrXV	438670	438820
chrXV	443770	443970
chrXV	445070	446220
chrXV	448920	449070
chrXV	520720	520920
chrXV	544420	544570
chrXV	550770	550920
chrXV	581070	581270
chrXV	606270	606420
chrXV	619220	619570
chrXV	631870	632070
chrXV	670920	671370
chrXV	722170	722520
chrXV	722670	722870
chrXV	780320	781070
chrXV	797020	797270
chrXV	825720	825870
chrXV	832470	832720
chrXV	854170	854320
chrXV	876820	876970
chrXV	877220	877420
chrXV	882320	882470
chrXV	883120	884220
chrXV	889870	890020
chrXV	908570	908820
chrXV	925220	925420
chrXV	931370	931520
chrXV	968070	968270
chrXV	978520	979020
chrXV	986870	988570
chrXV	989120	989370
chrXV	1027920	1028320
chrXV	1039220	1039720
chrXV	1039820	1042920
chrXV	1043370	1043520
chrXV	1073170	1073320
chrXV	1084720	1084920
chrXV	1086220	1086770
chrXV	1090970	1091270
chrXVI	3670	3870
chrXVI	6220	6470
chrXVI	74970	75270
chrXVI	75420	75620
chrXVI	96170	98370
chrXVI	109420	109570
chrXVI	110620	110820
chrXVI	111120	111370
chrXVI	111670	111820
chrXVI	112520	113270
chrXVI	113520	113870
chrXVI	114020	114770
chrXVI	128270	128770
chrXVI	150370	150520
chrXVI	214520	214970
chrXVI	227520	227670
chrXVI	297070	297370
chrXVI	298470	298720
chrXVI	303770	303970
chrXVI	308320	308520
chrXVI	329170	329320
chrXVI	405420	406420
chrXVI	407420	407770
chrXVI	425270	425420
chrXVI	431770	432370
chrXVI	432820	434120
chrXVI	445870	446770
chrXVI	448070	448220
chrXVI	451620	451820
chrXVI	453520	453720
chrXVI	456420	456570
chrXVI	484670	484920
chrXVI	485270	485420
chrXVI	502420	503070
chrXVI	520320	520520
chrXVI	550620	551020
chrXVI	555970	556170
chrXVI	572270	572470
chrXVI	576120	576270
chrXVI	582070	582220
chrXVI	586120	586270
chrXVI	588470	588820
chrXVI	614670	614820
chrXVI	627520	627720
chrXVI	641320	641670
chrXVI	642270	643770
chrXVI	645370	645770
chrXVI	645970	646670
chrXVI	656620	656770
chrXVI	678820	679320
chrXVI	700770	702270
chrXVI	718420	718670
chrXVI	810670	810820
chrXVI	810970	811770
chrXVI	822120	822320
chrXVI	823220	824270
chrXVI	829270	829520
chrXVI	830020	830570
chrXVI	830820	830970
chrXVI	901670	901870
chrXVI	920770	921420
chrXVI	946220	946520
chrXVI	947820	948020
