# Supplementary material for: Msn2/4 regulate expression of glycolytic enzymes and control transition from quiescence to growth
Source: eLife. 2017 Sep 26;6:e29938. doi: 10.7554/eLife.29938 (PMC5634782; doi:10.7554/eLife.29938)
Supplement: Figure 2—source data 2. [file elife-29938-fig2-data2.xlsx]

## Sheet: Sheet1
chrI	42620	44820
chrI	45170	45520
chrI	66720	66920
chrI	68220	68520
chrI	68720	68920
chrI	71120	71370
chrI	72120	73270
chrI	131220	131420
chrI	131620	131920
chrI	139120	141020
chrI	141570	141970
chrI	142720	143120
chrI	143470	143620
chrI	151420	151720
chrI	166270	166420
chrI	181120	181270
chrI	189770	190570
chrI	211170	211320
chrI	217370	217520
chrII	20	220
chrII	1020	1170
chrII	5370	5970
chrII	37870	38620
chrII	84370	84720
chrII	84970	85920
chrII	88620	88820
chrII	100170	100320
chrII	101320	101470
chrII	136120	136320
chrII	140520	140720
chrII	145920	146070
chrII	159820	159970
chrII	162520	162720
chrII	163020	163470
chrII	165120	165470
chrII	169270	169420
chrII	193620	193870
chrII	197520	197670
chrII	202370	202520
chrII	251320	251470
chrII	278520	278670
chrII	338520	338670
chrII	341620	341820
chrII	343620	343770
chrII	344020	344170
chrII	371620	372670
chrII	372720	373620
chrII	376020	376220
chrII	381120	381870
chrII	382070	382970
chrII	392520	392670
chrII	393620	394620
chrII	398320	398470
chrII	407320	407470
chrII	408620	408820
chrII	414220	414420
chrII	419520	419870
chrII	426920	427070
chrII	444770	444920
chrII	452220	452520
chrII	466220	466620
chrII	474070	474220
chrII	477320	477520
chrII	477770	479320
chrII	504520	504670
chrII	544620	544770
chrII	555220	555370
chrII	555720	555970
chrII	564970	565120
chrII	591770	592120
chrII	605220	605470
chrII	662670	662820
chrII	668720	668870
chrII	680320	681720
chrII	770620	770770
chrII	791120	791470
chrII	801570	801720
chrII	802620	803220
chrII	803570	804320
chrII	804920	805120
chrIII	-30	520
chrIII	50420	50770
chrIII	51120	52270
chrIII	76070	77520
chrIII	78420	78620
chrIII	90770	91170
chrIII	91370	92670
chrIII	92820	93120
chrIII	114320	114470
chrIII	120920	121720
chrIII	122620	122920
chrIII	123020	123170
chrIII	123520	123720
chrIII	133420	133670
chrIII	137070	137520
chrIII	137920	139020
chrIII	163520	163820
chrIII	177470	177770
chrIII	227870	228020
chrIII	228820	229020
chrIII	238720	238870
chrIII	262720	262870
chrIII	305720	305870
chrIII	316370	316570
chrIV	-30	220
chrIV	10120	10270
chrIV	13720	13970
chrIV	44620	45870
chrIV	60770	61370
chrIV	62170	62320
chrIV	76820	77070
chrIV	83520	83670
chrIV	118320	118470
chrIV	132770	133220
chrIV	134120	134720
chrIV	156070	156220
chrIV	212770	212920
chrIV	228920	229120
chrIV	230670	230820
chrIV	234370	234620
chrIV	322770	323270
chrIV	326270	326420
chrIV	355770	356020
chrIV	357220	357370
chrIV	366220	366520
chrIV	368770	369070
chrIV	381970	384820
chrIV	384970	385270
chrIV	386020	386170
chrIV	386670	387170
chrIV	410370	410520
chrIV	411220	411570
chrIV	416970	417170
chrIV	428120	428320
chrIV	428720	428870
chrIV	434220	434370
chrIV	449620	449920
chrIV	452770	452920
chrIV	463070	463220
chrIV	465170	465520
chrIV	472620	472870
chrIV	488770	488970
chrIV	508220	509170
chrIV	512270	512420
chrIV	538870	539270
chrIV	543720	543870
chrIV	544320	544470
chrIV	562770	562970
chrIV	573870	574020
chrIV	580070	580420
chrIV	591670	591920
chrIV	593370	593620
chrIV	599720	600420
chrIV	600870	602270
chrIV	635870	636470
chrIV	652420	652570
chrIV	721820	722070
chrIV	722520	722720
chrIV	765370	765520
chrIV	768320	768470
chrIV	769170	769320
chrIV	806270	806470
chrIV	807320	807470
chrIV	835920	836270
chrIV	867820	867970
chrIV	884370	884520
chrIV	893820	894470
chrIV	909520	909670
chrIV	930570	930870
chrIV	946320	946470
chrIV	954920	955570
chrIV	974370	974570
chrIV	976270	976770
chrIV	1011570	1011920
chrIV	1013770	1014070
chrIV	1016170	1016320
chrIV	1017170	1017320
chrIV	1050270	1050470
chrIV	1080520	1080820
chrIV	1095320	1095470
chrIV	1125120	1125270
chrIV	1154220	1155720
chrIV	1156370	1156720
chrIV	1157320	1157570
chrIV	1159120	1161070
chrIV	1161670	1162570
chrIV	1164970	1165170
chrIV	1166470	1166620
chrIV	1233820	1233970
chrIV	1237770	1237920
chrIV	1239120	1239270
chrIV	1241270	1241520
chrIV	1242270	1242820
chrIV	1244320	1244470
chrIV	1266520	1266670
chrIV	1270470	1270670
chrIV	1277320	1277570
chrIV	1278720	1278920
chrIV	1345420	1345670
chrIV	1362420	1362570
chrIV	1429120	1429420
chrIV	1434470	1434620
chrIV	1443770	1444420
chrIV	1444570	1444720
chrIV	1452820	1452970
chrIV	1453170	1454120
chrIV	1461720	1461870
chrIV	1468770	1469220
chrIV	1490020	1490470
chrIV	1507220	1507520
chrIV	1525520	1525870
chrIV	1527120	1527720
chrIX	-30	870
chrIX	3820	3970
chrIX	6570	6920
chrIX	7270	7570
chrIX	18920	19070
chrIX	21970	22170
chrIX	32970	33120
chrIX	84970	85120
chrIX	113370	113520
chrIX	127770	127970
chrIX	130020	130170
chrIX	138520	138770
chrIX	139220	139370
chrIX	166070	166220
chrIX	177620	177770
chrIX	186520	186820
chrIX	248870	249420
chrIX	254170	254670
chrIX	255170	256120
chrIX	256270	256470
chrIX	307970	308120
chrIX	317720	317870
chrIX	382220	382570
chrIX	383070	383320
chrIX	384270	384420
chrIX	386670	386870
chrIX	388420	388820
chrIX	394820	394970
chrIX	419670	419920
chrIX	420820	420970
chrIX	427320	427470
chrIX	438820	438970
chrIX	439220	439370
chrIX	439520	439670
chrM	13920	14370
chrM	16420	16970
chrM	18170	18320
chrM	20070	20220
chrM	20570	20770
chrM	26170	26420
chrM	28920	29170
chrM	59620	59770
chrM	60520	60920
chrM	61070	61270
chrM	61920	62070
chrM	75620	75870
chrM	79470	79920
chrV	320	520
chrV	3820	3970
chrV	23620	23770
chrV	42120	42320
chrV	61820	61970
chrV	69120	69420
chrV	77720	77870
chrV	82770	82920
chrV	85170	85520
chrV	85920	86270
chrV	86420	86720
chrV	117770	118120
chrV	123220	123570
chrV	138670	138820
chrV	138970	139670
chrV	141170	141420
chrV	174720	174870
chrV	191970	192170
chrV	225420	225670
chrV	242120	242320
chrV	260370	260520
chrV	264320	264720
chrV	264970	265320
chrV	265920	266120
chrV	266820	267320
chrV	267720	267870
chrV	268470	268620
chrV	280920	281070
chrV	287220	287370
chrV	305420	305570
chrV	335520	335770
chrV	339820	342020
chrV	342570	342720
chrV	349470	349620
chrV	363520	363670
chrV	364270	364420
chrV	386870	387070
chrV	409370	409570
chrV	441970	442420
chrV	461970	462120
chrV	467970	468220
chrV	491020	491320
chrV	522770	522920
chrV	559120	559270
chrV	569770	569970
chrV	570220	570770
chrV	576670	576820
chrVI	4070	4920
chrVI	19620	19771
chrVI	55021	55221
chrVI	58320	58471
chrVI	74771	74921
chrVI	95070	95221
chrVI	103271	103421
chrVI	106570	107070
chrVI	107321	107571
chrVI	107870	108121
chrVI	167471	167671
chrVI	183120	183321
chrVI	184670	184821
chrVI	210621	210771
chrVI	223271	223571
chrVI	224870	225471
chrVI	255420	255871
chrVII	23370	23520
chrVII	76570	76720
chrVII	110220	110470
chrVII	156320	156470
chrVII	166020	166320
chrVII	197270	197570
chrVII	229920	230070
chrVII	271270	272220
chrVII	280620	280770
chrVII	311520	311920
chrVII	323420	324070
chrVII	324670	324920
chrVII	384620	384970
chrVII	399370	399620
chrVII	399820	400070
chrVII	428220	428420
chrVII	472570	472720
chrVII	479220	479370
chrVII	479520	482620
chrVII	483320	483870
chrVII	516370	516520
chrVII	528670	528820
chrVII	547320	547570
chrVII	557720	557920
chrVII	576670	576820
chrVII	589570	589720
chrVII	592520	593020
chrVII	598870	599020
chrVII	600620	600920
chrVII	609820	610270
chrVII	625170	625570
chrVII	649720	649970
chrVII	650820	651070
chrVII	651470	651620
chrVII	677720	677870
chrVII	733320	733470
chrVII	766220	766620
chrVII	772070	772220
chrVII	785470	785870
chrVII	806720	807020
chrVII	809620	810070
chrVII	878520	878670
chrVII	882520	883770
chrVII	884020	884170
chrVII	905370	905720
chrVII	914970	915120
chrVII	951370	951520
chrVII	961320	961520
chrVII	976970	977120
chrVII	986820	987570
chrVII	989920	990270
chrVII	993870	994270
chrVII	1000170	1000320
chrVII	1001270	1002270
chrVII	1011270	1011420
chrVII	1026720	1026870
chrVII	1027070	1027220
chrVII	1050320	1050470
chrVII	1064670	1065370
chrVII	1084420	1084720
chrVII	1090720	1090870
chrVIII	20	270
chrVIII	17676	18020
chrVIII	18226	18376
chrVIII	34420	35120
chrVIII	35270	35770
chrVIII	48070	48476
chrVIII	50720	50970
chrVIII	55426	55726
chrVIII	56070	56226
chrVIII	98570	98726
chrVIII	105220	105620
chrVIII	122326	122676
chrVIII	122920	123220
chrVIII	174670	174820
chrVIII	175076	175370
chrVIII	190176	190370
chrVIII	204270	204426
chrVIII	212520	212676
chrVIII	212870	212976
chrVIII	214526	214720
chrVIII	214870	215020
chrVIII	227220	227376
chrVIII	236120	236470
chrVIII	237870	238020
chrVIII	289320	289576
chrVIII	293570	293726
chrVIII	296926	297126
chrVIII	375426	375620
chrVIII	382020	382320
chrVIII	388920	389070
chrVIII	422526	422770
chrVIII	451570	452626
chrVIII	455670	455820
chrVIII	461476	461670
chrVIII	462070	462226
chrVIII	462870	463670
chrVIII	470620	470776
chrVIII	504520	504820
chrVIII	531576	531920
chrVIII	540820	541126
chrVIII	553620	554220
chrVIII	554370	554776
chrVIII	554970	556070
chrVIII	556770	557470
chrVIII	559070	559220
chrVIII	562170	562626
chrX	-30	720
chrX	4170	4370
chrX	6570	6920
chrX	7220	7620
chrX	7770	7920
chrX	18820	19070
chrX	26320	26620
chrX	36620	36820
chrX	69070	69220
chrX	74220	74720
chrX	119920	120170
chrX	120570	120870
chrX	121170	121870
chrX	123120	123370
chrX	136170	136570
chrX	139520	139820
chrX	160020	160370
chrX	192270	192420
chrX	195420	195770
chrX	233920	234070
chrX	236670	236820
chrX	268470	268620
chrX	291120	291320
chrX	294520	294720
chrX	337720	338020
chrX	338770	339070
chrX	348870	349120
chrX	355370	355520
chrX	374470	374620
chrX	391920	392070
chrX	453720	454320
chrX	454970	455120
chrX	455770	455920
chrX	471820	471970
chrX	520070	520770
chrX	521770	521920
chrX	524020	524170
chrX	525870	526070
chrX	606020	607020
chrX	608770	609270
chrX	622570	622770
chrX	623120	623270
chrX	639370	639670
chrX	647070	647270
chrX	648370	649170
chrX	649470	649620
chrX	652320	652520
chrX	652820	652970
chrX	662970	663270
chrX	679320	680020
chrX	681170	681470
chrX	684320	684570
chrX	702070	702420
chrX	731870	732070
chrX	735470	735620
chrX	745520	745720
chrXI	-30	220
chrXI	20670	20870
chrXI	21420	21920
chrXI	22320	24370
chrXI	24920	25120
chrXI	68470	69170
chrXI	80620	80820
chrXI	82720	82870
chrXI	91920	92070
chrXI	92470	92620
chrXI	93820	93970
chrXI	99770	99970
chrXI	163670	163920
chrXI	169220	169420
chrXI	169670	169820
chrXI	202570	202720
chrXI	216520	216670
chrXI	225870	226120
chrXI	230620	231220
chrXI	233020	233220
chrXI	258270	258520
chrXI	260320	260470
chrXI	302570	302720
chrXI	307770	307920
chrXI	321470	321620
chrXI	322070	322420
chrXI	326070	326920
chrXI	327520	327670
chrXI	334020	334270
chrXI	338620	338770
chrXI	340320	340470
chrXI	355170	355770
chrXI	381870	382070
chrXI	382420	383670
chrXI	384820	385120
chrXI	407870	408020
chrXI	428620	428820
chrXI	463170	463320
chrXI	515270	516470
chrXI	516820	517070
chrXI	517520	517670
chrXI	518570	518820
chrXI	519370	520320
chrXI	520520	520670
chrXI	558370	558620
chrXI	570870	571020
chrXI	580720	581020
chrXI	589620	589770
chrXI	590670	590920
chrXI	614520	614820
chrXI	630220	630420
chrXI	666270	666420
chrXII	20	272
chrXII	11070	11372
chrXII	29322	29672
chrXII	65470	65772
chrXII	84170	84472
chrXII	86970	87072
chrXII	88270	88422
chrXII	89620	90422
chrXII	90670	90820
chrXII	91072	91222
chrXII	95822	97122
chrXII	108420	108572
chrXII	125170	125272
chrXII	198170	198322
chrXII	232422	233622
chrXII	253220	253522
chrXII	257822	259022
chrXII	289720	289870
chrXII	332172	332370
chrXII	370422	370922
chrXII	424070	424572
chrXII	449520	449820
chrXII	451470	468972
chrXII	472420	472622
chrXII	482020	482172
chrXII	485670	485872
chrXII	489320	489522
chrXII	489872	490473
chrXII	504170	504322
chrXII	516072	516372
chrXII	605020	605172
chrXII	637122	639872
chrXII	645922	646072
chrXII	704422	704722
chrXII	728220	728370
chrXII	733322	733872
chrXII	737820	737972
chrXII	782770	782922
chrXII	783070	783272
chrXII	783570	783772
chrXII	789870	790022
chrXII	809370	809522
chrXII	837622	837822
chrXII	837972	838972
chrXII	875170	875322
chrXII	921470	921722
chrXII	1064920	1065472
chrXII	1071470	1071972
chrXIII	20	370
chrXIII	5170	5670
chrXIII	30220	30420
chrXIII	69770	70020
chrXIII	70320	70470
chrXIII	87270	87570
chrXIII	91170	91320
chrXIII	91770	91920
chrXIII	159120	159270
chrXIII	162270	162570
chrXIII	162920	163120
chrXIII	165570	166620
chrXIII	183870	184020
chrXIII	220920	221120
chrXIII	253320	253620
chrXIII	259120	259270
chrXIII	267970	268220
chrXIII	282920	283120
chrXIII	287520	287770
chrXIII	297720	298770
chrXIII	302920	303070
chrXIII	306120	306820
chrXIII	334920	335070
chrXIII	347170	347420
chrXIII	353220	353370
chrXIII	379320	379470
chrXIII	396520	396670
chrXIII	408120	408770
chrXIII	431820	431970
chrXIII	434370	434520
chrXIII	472920	473170
chrXIII	482470	482670
chrXIII	483520	483670
chrXIII	499470	500320
chrXIII	507570	507920
chrXIII	508120	508770
chrXIII	510970	511170
chrXIII	527570	527720
chrXIII	540170	540820
chrXIII	552870	553120
chrXIII	556970	557420
chrXIII	610070	610220
chrXIII	632070	632220
chrXIII	633420	633570
chrXIII	633820	634420
chrXIII	637170	637320
chrXIII	653320	653670
chrXIII	661770	662120
chrXIII	675270	675520
chrXIII	701270	701420
chrXIII	702820	703220
chrXIII	747870	748020
chrXIII	751370	751570
chrXIII	753270	753520
chrXIII	757920	758170
chrXIII	774120	774570
chrXIII	810920	811070
chrXIII	852120	852270
chrXIII	861220	861420
chrXIII	872720	873820
chrXIII	880570	880720
chrXIII	886670	886820
chrXIII	887570	887770
chrXIII	887920	888670
chrXIII	895570	895720
chrXIII	902520	902670
chrXIII	923670	923820
chrXIII	924020	924370
chrXIV	20	270
chrXIV	6220	6820
chrXIV	65270	65420
chrXIV	68520	68670
chrXIV	87420	87720
chrXIV	91570	91770
chrXIV	96220	96370
chrXIV	107270	107420
chrXIV	116670	116820
chrXIV	118520	118720
chrXIV	174670	174820
chrXIV	187770	187920
chrXIV	196920	197070
chrXIV	197870	198520
chrXIV	217370	217670
chrXIV	252720	253870
chrXIV	273920	274070
chrXIV	295720	295870
chrXIV	301270	301570
chrXIV	301770	302120
chrXIV	303120	303370
chrXIV	303520	303720
chrXIV	310220	310370
chrXIV	335970	336120
chrXIV	349970	350270
chrXIV	355420	355720
chrXIV	357720	358920
chrXIV	360170	360370
chrXIV	373770	373970
chrXIV	405670	406020
chrXIV	414020	414970
chrXIV	415220	416270
chrXIV	427120	427470
chrXIV	493970	494120
chrXIV	499970	500820
chrXIV	503170	503470
chrXIV	507420	507570
chrXIV	547070	547220
chrXIV	559320	559620
chrXIV	560320	560470
chrXIV	604820	605170
chrXIV	618620	618870
chrXIV	619020	619270
chrXIV	619820	619970
chrXIV	628720	628970
chrXIV	629670	630020
chrXIV	632620	633470
chrXIV	634070	634220
chrXIV	662220	662470
chrXIV	663870	664070
chrXIV	733470	733870
chrXIV	750020	750170
chrXIV	784020	784320
chrXV	-30	270
chrXV	320	620
chrXV	24670	24820
chrXV	27720	27970
chrXV	28820	31270
chrXV	80820	81170
chrXV	81320	81470
chrXV	83220	83420
chrXV	88120	88370
chrXV	93070	94020
chrXV	109220	109920
chrXV	110470	110620
chrXV	110870	111070
chrXV	128770	128920
chrXV	159620	160070
chrXV	160820	160970
chrXV	161220	161370
chrXV	161720	161920
chrXV	170570	170720
chrXV	186820	186970
chrXV	216420	216620
chrXV	218770	218920
chrXV	232120	232270
chrXV	274620	274770
chrXV	282120	282270
chrXV	285720	285870
chrXV	304820	305120
chrXV	312670	312820
chrXV	382220	382770
chrXV	391570	392220
chrXV	424320	424570
chrXV	444870	446170
chrXV	446820	446970
chrXV	479920	480120
chrXV	480320	480470
chrXV	487370	487520
chrXV	494220	494420
chrXV	504570	504720
chrXV	511320	511520
chrXV	520670	520920
chrXV	544420	544620
chrXV	579820	579970
chrXV	619270	619520
chrXV	631920	632070
chrXV	671020	671420
chrXV	722670	722870
chrXV	723470	724820
chrXV	770170	770370
chrXV	780570	780920
chrXV	797020	797270
chrXV	825720	825920
chrXV	832420	832620
chrXV	860420	860570
chrXV	882170	882470
chrXV	883220	883920
chrXV	889870	890070
chrXV	900420	900570
chrXV	904020	904170
chrXV	908570	908920
chrXV	911920	912070
chrXV	925270	925420
chrXV	931320	931470
chrXV	968070	968370
chrXV	978520	979020
chrXV	979170	979320
chrXV	986920	988670
chrXV	989070	989570
chrXV	1028020	1028370
chrXV	1036570	1036720
chrXV	1039270	1042820
chrXV	1043370	1043520
chrXV	1073170	1073320
chrXV	1084620	1085020
chrXV	1086320	1086920
chrXV	1090970	1091220
chrXVI	3720	4020
chrXVI	6170	6520
chrXVI	67070	67221
chrXVI	74970	75620
chrXVI	96270	98321
chrXVI	98770	98970
chrXVI	114371	114921
chrXVI	118070	118221
chrXVI	128370	128620
chrXVI	188671	188870
chrXVI	214420	214921
chrXVI	227520	227671
chrXVI	242870	243021
chrXVI	257120	257271
chrXVI	297020	297420
chrXVI	303720	303970
chrXVI	339520	339721
chrXVI	405320	406020
chrXVI	406220	406370
chrXVI	425270	425520
chrXVI	431770	432371
chrXVI	432921	434021
chrXVI	450920	451120
chrXVI	451270	451371
chrXVI	453421	453871
chrXVI	502820	503171
chrXVI	520370	520521
chrXVI	550671	551120
chrXVI	572270	572471
chrXVI	576170	576320
chrXVI	582070	582220
chrXVI	582870	583021
chrXVI	586070	586271
chrXVI	588470	588771
chrXVI	627521	627721
chrXVI	641271	641771
chrXVI	642320	643670
chrXVI	645120	645820
chrXVI	646021	646220
chrXVI	646470	646621
chrXVI	656620	656771
chrXVI	666071	666221
chrXVI	678820	679321
chrXVI	695120	695270
chrXVI	700720	702320
chrXVI	736770	736921
chrXVI	789670	789821
chrXVI	819470	819620
chrXVI	822120	822320
chrXVI	828870	829021
chrXVI	829221	829471
chrXVI	830020	830571
chrXVI	830820	830971
chrXVI	831971	832170
chrXVI	883020	883170
chrXVI	901670	901821
chrXVI	920921	921470
chrXVI	930520	930671
chrXVI	942770	943120
chrXVI	946320	946470
chrXVI	947820	947970
