# Supplementary material for: Msn2/4 regulate expression of glycolytic enzymes and control transition from quiescence to growth
Source: eLife. 2017 Sep 26;6:e29938. doi: 10.7554/eLife.29938 (PMC5634782; doi:10.7554/eLife.29938)
Supplement: Figure 4—source data 2. [file elife-29938-fig4-data2.xlsx]

## Sheet: Sheet1
Gene	Msn2 binding	Msn4 binding	Gene expression in msn2msn4 double mutant
YAL001C	+	+	No change
YAL002W	+	+	No change
YAL003W	+	+	No change
YAL004W	+	+	down
YAL005C	+	+	down
YAL007C	-	-	up
YAL008W	-	-	down
YAL009W	-	-	No change
YAL010C	-	-	No change
YAL011W	+	+	No change
YAL012W	+	+	No change
YAL013W	-	-	No change
YAL014C	-	-	No change
YAL015C	-	-	No change
YAL016C-A	-	-	No change
YAL016C-B	-	-	down
YAL016W	-	-	No change
YAL017W	-	-	down
YAL018C	-	-	No change
YAL019W	-	-	No change
YAL019W-A	-	-	No change
YAL020C	-	-	No change
YAL021C	-	-	No change
YAL022C	-	-	No change
YAL023C	-	-	No change
YAL024C	-	-	No change
YAL025C	-	-	No change
YAL026C	-	-	No change
YAL026C-A	-	-	No change
YAL027W	-	-	No change
YAL028W	+	-	No change
YAL029C	+	-	No change
YAL030W	-	-	No change
YAL031C	-	-	No change
YAL031W-A	-	-	No change
YAL032C	-	-	No change
YAL033W	-	-	No change
YAL034C	-	-	down
YAL034C-B	-	-	No change
YAL034W-A	-	-	No change
YAL035W	-	-	No change
YAL036C	-	-	No change
YAL037C-A	+	-	No change
YAL037C-B	+	+	up
YAL037W	+	-	No change
YAL038W	+	+	up
YAL039C	+	+	No change
YAL040C	+	+	No change
YAL041W	-	-	No change
YAL042C-A	-	-	No change
YAL042W	-	-	No change
YAL043C	-	-	No change
YAL044C	-	-	No change
YAL044W-A	-	-	No change
YAL045C	-	-	No change
YAL046C	-	-	No change
YAL047C	-	-	No change
YAL047W-A	-	-	No change
YAL048C	-	-	No change
YAL049C	-	-	No change
YAL051W	-	-	No change
YAL053W	+	+	No change
YAL054C	+	+	No change
YAL055W	+	+	No change
YAL056C-A	-	-	No change
YAL056W	-	-	No change
YAL058W	-	-	No change
YAL059C-A	-	-	No change
YAL059W	-	-	No change
YAL060W	-	-	down
YAL061W	-	-	down
YAL062W	-	-	No change
YAL063C	-	-	No change
YAL063C-A	-	-	No change
YAL064C-A	-	-	No change
YAL064W	-	-	No change
YAL064W-B	-	-	No change
YAL065C	-	-	No change
YAL066W	-	-	No change
YAL067C	-	-	No change
YAL067W-A	-	-	No change
YAL068C	-	-	No change
YAL068W-A	-	-	No change
YAL069W	-	-	No change
YAR002C-A	-	-	No change
YAR002W	+	+	No change
YAR003W	-	-	No change
YAR007C	-	-	No change
YAR008W	-	-	up
YAR009C	-	-	up
YAR010C	+	+	No change
YAR014C	-	-	No change
YAR015W	+	-	No change
YAR018C	+	-	No change
YAR019C	-	-	No change
YAR019W-A	-	-	No change
YAR020C	-	-	up
YAR023C	-	-	No change
YAR027W	-	-	No change
YAR028W	-	-	No change
YAR029W	-	-	No change
YAR030C	-	-	No change
YAR031W	-	-	No change
YAR033W	-	-	No change
YAR035C-A	-	-	No change
YAR035W	+	+	down
YAR042W	-	-	No change
YAR047C	-	-	No change
YAR050W	-	-	No change
YAR053W	-	-	No change
YAR060C	-	+	No change
YAR061W	-	+	No change
YAR062W	-	-	No change
YAR064W	-	-	No change
YAR066W	-	-	No change
YAR068W	-	-	No change
YAR069C	-	-	No change
YAR070C	-	-	No change
YAR071W	-	-	No change
YAR073W	-	-	No change
YAR075W	-	-	No change
YBL001C	+	-	down
YBL002W	-	-	up
YBL003C	-	-	up
YBL004W	-	-	No change
YBL005W	+	-	No change
YBL005W-A	-	-	No change
YBL005W-B	-	-	up
YBL006C	+	-	No change
YBL006W-A	-	-	No change
YBL007C	-	-	No change
YBL008W	-	-	No change
YBL008W-A	-	-	No change
YBL009W	-	-	up
YBL010C	-	-	No change
YBL011W	-	-	No change
YBL012C	-	-	No change
YBL013W	-	+	No change
YBL014C	-	+	No change
YBL015W	+	+	No change
YBL016W	-	-	up
YBL017C	-	-	No change
YBL018C	-	-	No change
YBL019W	-	-	No change
YBL020W	-	-	No change
YBL021C	-	-	No change
YBL022C	-	-	No change
YBL023C	-	-	No change
YBL024W	-	-	No change
YBL025W	-	-	No change
YBL026W	-	-	No change
YBL027W	+	+	No change
YBL028C	-	-	No change
YBL029C-A	+	+	down
YBL029W	-	+	No change
YBL030C	+	+	No change
YBL031W	+	+	No change
YBL032W	+	+	No change
YBL033C	+	+	No change
YBL034C	-	-	No change
YBL035C	-	-	No change
YBL036C	-	-	No change
YBL037W	-	-	No change
YBL038W	-	+	No change
YBL039C	-	+	No change
YBL039C-A	-	-	No change
YBL039W-B	-	-	No change
YBL040C	-	-	No change
YBL041W	+	+	No change
YBL042C	+	+	No change
YBL043W	-	+	No change
YBL044W	-	+	No change
YBL045C	+	+	No change
YBL046W	-	-	No change
YBL047C	-	-	No change
YBL048W	-	-	No change
YBL049W	-	-	No change
YBL050W	-	-	No change
YBL051C	-	-	No change
YBL052C	-	-	No change
YBL053W	-	-	No change
YBL054W	-	-	No change
YBL055C	-	-	No change
YBL056W	-	-	No change
YBL057C	-	-	No change
YBL058W	-	-	No change
YBL059C-A	-	-	No change
YBL059W	-	-	No change
YBL060W	-	-	No change
YBL061C	-	-	No change
YBL062W	-	-	No change
YBL063W	-	+	No change
YBL064C	-	+	down
YBL065W	-	+	down
YBL066C	-	+	No change
YBL067C	-	-	No change
YBL068W	-	-	No change
YBL068W-A	-	-	No change
YBL069W	-	-	No change
YBL070C	-	-	No change
YBL071C	-	-	No change
YBL071C-B	-	-	up
YBL071W-A	-	-	No change
YBL072C	-	+	No change
YBL073W	-	-	No change
YBL074C	+	-	No change
YBL075C	+	+	No change
YBL076C	+	+	No change
YBL077W	-	-	No change
YBL078C	-	-	No change
YBL079W	-	-	No change
YBL080C	-	-	No change
YBL081W	-	-	No change
YBL082C	-	-	No change
YBL083C	-	-	No change
YBL084C	-	-	No change
YBL085W	-	-	No change
YBL086C	-	-	down
YBL087C	-	-	No change
YBL088C	-	-	No change
YBL089W	-	-	No change
YBL090W	-	-	No change
YBL091C	-	-	No change
YBL091C-A	-	-	No change
YBL092W	-	-	No change
YBL093C	-	-	No change
YBL094C	-	-	No change
YBL095W	-	-	No change
YBL096C	-	-	No change
YBL097W	-	-	No change
YBL098W	+	+	No change
YBL099W	+	+	No change
YBL100C	+	+	No change
YBL100W-A	-	-	No change
YBL100W-B	-	-	up
YBL100W-C	-	-	No change
YBL101C	-	-	No change
YBL102W	-	-	No change
YBL103C	-	-	No change
YBL104C	-	-	No change
YBL105C	-	-	No change
YBL106C	-	-	No change
YBL107C	-	-	No change
YBL107W-A	-	-	No change
YBL108C-A	-	-	No change
YBL108W	-	-	No change
YBL109W	+	+	No change
YBL111C	+	+	No change
YBL112C	-	-	No change
YBL113C	+	+	No change
YBL113W-A	+	+	down
YBR001C	-	-	No change
YBR002C	-	-	No change
YBR003W	-	-	No change
YBR004C	-	-	No change
YBR005W	-	-	No change
YBR006W	-	-	No change
YBR007C	-	+	No change
YBR008C	-	-	up
YBR009C	-	-	up
YBR010W	-	-	up
YBR011C	-	-	No change
YBR012C	-	-	No change
YBR012W-A	-	-	No change
YBR012W-B	-	-	up
YBR013C	-	-	No change
YBR014C	-	-	No change
YBR015C	-	-	No change
YBR016W	-	-	No change
YBR017C	-	-	No change
YBR018C	-	-	up
YBR019C	+	+	No change
YBR020W	+	+	No change
YBR021W	-	-	No change
YBR022W	-	-	No change
YBR023C	-	-	up
YBR024W	-	-	No change
YBR025C	-	-	No change
YBR026C	-	-	No change
YBR027C	-	-	No change
YBR028C	-	-	No change
YBR029C	-	-	No change
YBR030W	-	-	No change
YBR031W	-	-	No change
YBR032W	-	-	No change
YBR033W	-	-	No change
YBR034C	-	-	No change
YBR035C	-	-	No change
YBR036C	-	-	No change
YBR037C	-	-	No change
YBR038W	-	-	up
YBR039W	-	-	No change
YBR040W	-	-	up
YBR041W	-	-	No change
YBR042C	-	-	No change
YBR043C	-	-	No change
YBR044C	-	-	No change
YBR045C	-	-	No change
YBR046C	-	-	down
YBR047W	-	-	No change
YBR048W	-	-	No change
YBR049C	-	-	No change
YBR050C	-	+	No change
YBR051W	-	-	No change
YBR052C	-	-	No change
YBR053C	-	-	No change
YBR054W	+	+	No change
YBR055C	-	-	No change
YBR056C-B	-	-	No change
YBR056W	-	-	No change
YBR056W-A	-	-	No change
YBR057C	-	-	No change
YBR058C	-	-	No change
YBR058C-A	-	-	No change
YBR059C	+	-	down
YBR060C	-	-	No change
YBR061C	-	-	No change
YBR062C	-	-	No change
YBR063C	-	-	No change
YBR064W	-	-	No change
YBR065C	-	-	No change
YBR066C	-	-	up
YBR067C	+	+	No change
YBR068C	+	+	No change
YBR069C	-	-	up
YBR070C	-	-	up
YBR071W	-	-	No change
YBR072C-A	+	+	No change
YBR072W	+	+	down
YBR073W	+	+	No change
YBR074W	-	-	No change
YBR076C-A	-	-	No change
YBR076W	-	-	No change
YBR077C	-	+	No change
YBR078W	+	+	up
YBR079C	+	+	No change
YBR080C	-	-	No change
YBR081C	-	-	No change
YBR082C	-	+	No change
YBR083W	+	+	up
YBR084C-A	+	+	No change
YBR084W	+	-	No change
YBR085C-A	+	+	down
YBR085W	-	-	No change
YBR086C	-	-	No change
YBR087W	-	-	No change
YBR088C	-	-	up
YBR089C-A	-	+	No change
YBR089W	-	-	up
YBR090C	-	+	No change
YBR091C	-	-	No change
YBR092C	-	-	No change
YBR093C	-	-	No change
YBR094W	-	-	No change
YBR095C	-	-	No change
YBR096W	-	-	No change
YBR097W	-	-	No change
YBR098W	-	-	No change
YBR099C	-	-	No change
YBR101C	-	+	No change
YBR102C	-	-	No change
YBR103C-A	-	-	No change
YBR103W	-	-	No change
YBR104W	-	-	No change
YBR105C	+	+	No change
YBR106W	+	+	No change
YBR107C	-	-	No change
YBR108W	-	-	No change
YBR109C	-	-	No change
YBR109W-A	-	-	No change
YBR110W	-	-	No change
YBR111C	-	-	down
YBR111W-A	-	-	No change
YBR112C	+	+	No change
YBR113W	-	-	No change
YBR114W	-	+	No change
YBR115C	-	+	No change
YBR116C	-	+	down
YBR117C	-	-	down
YBR118W	+	+	No change
YBR119W	+	+	No change
YBR120C	-	-	No change
YBR121C	-	-	No change
YBR121C-A	-	-	No change
YBR122C	-	-	No change
YBR123C	-	-	No change
YBR124W	-	-	No change
YBR125C	-	-	No change
YBR126C	-	-	down
YBR126W-A	-	-	down
YBR126W-B	-	-	down
YBR127C	-	-	No change
YBR128C	-	-	No change
YBR129C	-	-	No change
YBR130C	-	-	No change
YBR131C-A	-	-	No change
YBR131W	-	-	No change
YBR132C	-	-	No change
YBR133C	+	+	No change
YBR134W	+	+	No change
YBR135W	+	+	No change
YBR136W	-	-	No change
YBR137W	-	-	No change
YBR138C	-	-	No change
YBR139W	-	-	down
YBR140C	-	-	No change
YBR141C	-	-	No change
YBR141W-A	-	-	No change
YBR142W	-	-	No change
YBR143C	-	-	No change
YBR144C	-	-	No change
YBR145W	-	-	No change
YBR146W	-	-	No change
YBR147W	-	-	down
YBR148W	-	-	up
YBR149W	-	-	down
YBR150C	+	+	No change
YBR151W	+	+	down
YBR152W	-	-	No change
YBR153W	-	-	No change
YBR154C	-	-	No change
YBR155W	-	-	No change
YBR156C	-	-	No change
YBR157C	-	-	No change
YBR158W	-	+	up
YBR159W	-	-	No change
YBR160W	-	-	No change
YBR161W	-	-	down
YBR162C	-	+	up
YBR162W-A	-	+	No change
YBR163W	-	+	No change
YBR164C	-	-	No change
YBR165W	-	-	No change
YBR166C	-	-	No change
YBR167C	-	-	No change
YBR168W	-	-	No change
YBR169C	-	-	No change
YBR170C	-	-	No change
YBR171W	-	-	No change
YBR172C	-	-	down
YBR173C	-	-	No change
YBR174C	-	-	up
YBR175W	-	-	No change
YBR176W	-	-	No change
YBR177C	-	-	No change
YBR178W	-	-	No change
YBR179C	-	-	No change
YBR180W	-	-	No change
YBR181C	-	+	No change
YBR182C	-	-	down
YBR182C-A	-	-	No change
YBR183W	-	-	No change
YBR184W	-	-	No change
YBR185C	-	-	No change
YBR186W	-	-	No change
YBR187W	-	-	No change
YBR188C	-	-	No change
YBR189W	-	+	No change
YBR190W	-	+	No change
YBR191W	-	-	No change
YBR191W-A	-	-	No change
YBR192W	-	-	No change
YBR193C	-	-	No change
YBR194W	-	-	No change
YBR195C	-	-	No change
YBR196C	+	-	No change
YBR196C-A	+	-	No change
YBR196C-B	-	-	up
YBR197C	-	-	No change
YBR198C	-	-	No change
YBR199W	-	-	No change
YBR200W	-	-	No change
YBR200W-A	-	-	No change
YBR201C-A	-	-	up
YBR201W	-	-	No change
YBR202W	-	-	No change
YBR203W	-	-	No change
YBR204C	-	-	No change
YBR205W	-	-	No change
YBR206W	-	-	No change
YBR207W	+	-	No change
YBR208C	+	-	No change
YBR209W	-	-	No change
YBR210W	-	-	No change
YBR211C	-	-	No change
YBR212W	-	-	No change
YBR213W	-	-	No change
YBR214W	-	-	No change
YBR215W	-	-	No change
YBR216C	-	-	No change
YBR217W	-	-	No change
YBR218C	-	+	No change
YBR219C	-	+	No change
YBR220C	-	-	No change
YBR221C	-	-	No change
YBR221W-A	-	-	down
YBR222C	-	+	down
YBR223C	-	+	No change
YBR223W-A	-	+	No change
YBR224W	-	-	No change
YBR225W	-	-	No change
YBR226C	-	-	No change
YBR227C	-	-	No change
YBR228W	-	-	No change
YBR229C	-	-	No change
YBR230C	+	+	No change
YBR230W-A	+	+	No change
YBR231C	-	-	No change
YBR232C	-	-	No change
YBR233W	-	-	No change
YBR233W-A	-	-	No change
YBR234C	-	-	No change
YBR235W	-	-	No change
YBR236C	-	-	No change
YBR237W	-	-	No change
YBR238C	-	-	No change
YBR239C	-	-	No change
YBR240C	-	-	No change
YBR241C	-	-	down
YBR242W	-	-	No change
YBR243C	-	-	No change
YBR244W	-	-	No change
YBR245C	-	-	No change
YBR246W	-	-	No change
YBR247C	-	-	No change
YBR248C	-	-	No change
YBR249C	-	-	No change
YBR250W	-	-	up
YBR251W	-	-	No change
YBR252W	-	-	up
YBR253W	-	-	No change
YBR254C	-	-	No change
YBR255C-A	-	-	No change
YBR255W	-	-	No change
YBR256C	-	-	No change
YBR257W	-	-	No change
YBR258C	-	-	No change
YBR259W	-	-	No change
YBR260C	-	-	No change
YBR261C	-	-	No change
YBR262C	-	-	No change
YBR263W	-	-	No change
YBR264C	-	-	No change
YBR265W	-	-	No change
YBR266C	-	-	No change
YBR267W	-	-	No change
YBR268W	-	-	No change
YBR269C	-	-	No change
YBR270C	-	-	No change
YBR271W	-	-	No change
YBR272C	-	-	No change
YBR273C	-	-	No change
YBR274W	-	-	No change
YBR275C	-	-	No change
YBR276C	-	-	No change
YBR277C	+	-	No change
YBR278W	-	-	No change
YBR279W	+	-	No change
YBR280C	-	-	No change
YBR281C	-	-	No change
YBR282W	-	-	No change
YBR283C	-	+	No change
YBR284W	-	+	No change
YBR285W	-	-	No change
YBR286W	-	-	No change
YBR287W	-	-	down
YBR288C	-	-	No change
YBR289W	-	-	No change
YBR290W	-	-	No change
YBR291C	-	-	No change
YBR292C	-	-	No change
YBR293W	-	-	No change
YBR294W	+	+	up
YBR295W	-	-	No change
YBR296C	-	-	No change
YBR296C-A	-	-	up
YBR297W	-	+	No change
YBR298C	+	+	down
YBR298C-A	+	+	down
YBR299W	+	+	down
YBR300C	-	-	No change
YBR301W	-	-	No change
YBR302C	-	-	down
YCL001W	-	-	No change
YCL001W-A	-	-	No change
YCL001W-B	-	-	No change
YCL002C	-	-	No change
YCL004W	-	-	No change
YCL005W	+	-	No change
YCL005W-A	+	-	No change
YCL007C	+	-	No change
YCL008C	+	-	No change
YCL009C	-	-	No change
YCL010C	-	-	No change
YCL011C	-	-	No change
YCL012C	-	-	No change
YCL014W	-	-	No change
YCL016C	-	-	No change
YCL017C	+	+	No change
YCL018W	+	+	No change
YCL019W	-	-	up
YCL020W	-	-	No change
YCL021W-A	-	-	up
YCL022C	-	-	No change
YCL023C	-	-	No change
YCL024W	+	+	No change
YCL025C	+	+	up
YCL026C-A	-	-	No change
YCL026C-B	-	-	No change
YCL027W	-	-	up
YCL028W	-	-	No change
YCL029C	-	-	No change
YCL030C	-	-	No change
YCL031C	-	-	No change
YCL032W	-	-	No change
YCL033C	-	-	No change
YCL034W	-	-	No change
YCL035C	-	-	down
YCL036W	-	-	No change
YCL037C	-	-	No change
YCL038C	-	-	No change
YCL039W	+	+	No change
YCL040W	+	+	down
YCL041C	+	+	No change
YCL042W	+	+	down
YCL043C	+	+	No change
YCL044C	-	-	No change
YCL045C	-	-	No change
YCL046W	-	-	No change
YCL047C	-	-	No change
YCL048W	-	-	No change
YCL048W-A	-	-	down
YCL049C	-	-	No change
YCL050C	-	-	No change
YCL051W	-	-	down
YCL052C	-	-	down
YCL054W	-	-	No change
YCL055W	-	-	up
YCL056C	-	-	No change
YCL057C-A	-	-	No change
YCL057W	-	-	No change
YCL058C	-	-	No change
YCL058W-A	-	-	No change
YCL059C	-	-	No change
YCL061C	-	-	No change
YCL063W	-	-	No change
YCL064C	-	-	No change
YCL065W	-	-	No change
YCL066W	-	-	No change
YCL067C	-	-	No change
YCL068C	-	-	No change
YCL069W	-	-	No change
YCL073C	-	-	No change
YCL074W	-	-	No change
YCL075W	-	-	No change
YCL076W	-	-	No change
YCR001W	-	-	No change
YCR002C	-	-	No change
YCR003W	-	-	No change
YCR004C	+	+	No change
YCR005C	+	+	No change
YCR006C	+	+	No change
YCR007C	-	-	No change
YCR008W	-	-	No change
YCR009C	-	-	No change
YCR010C	+	+	up
YCR011C	+	+	No change
YCR012W	+	+	down
YCR013C	+	+	down
YCR014C	+	-	No change
YCR015C	-	-	No change
YCR016W	-	-	No change
YCR017C	-	-	No change
YCR018C	-	-	up
YCR018C-A	-	-	No change
YCR019W	-	-	No change
YCR020C	-	-	No change
YCR020C-A	-	-	No change
YCR020W-B	-	-	No change
YCR021C	-	-	down
YCR022C	-	-	No change
YCR023C	-	-	No change
YCR024C	+	-	No change
YCR024C-A	+	+	No change
YCR024C-B	-	+	No change
YCR025C	+	+	No change
YCR026C	-	-	No change
YCR027C	-	-	No change
YCR028C	-	-	No change
YCR028C-A	-	-	No change
YCR030C	-	-	No change
YCR031C	+	+	No change
YCR032W	-	-	No change
YCR033W	-	-	No change
YCR034W	-	-	up
YCR035C	-	-	No change
YCR036W	-	-	No change
YCR037C	-	-	No change
YCR038C	-	-	No change
YCR038W-A	-	-	No change
YCR039C	-	-	No change
YCR040W	-	-	No change
YCR041W	-	-	up
YCR042C	-	-	No change
YCR043C	-	-	No change
YCR044C	-	-	No change
YCR045C	-	-	No change
YCR045W-A	-	-	No change
YCR046C	-	-	No change
YCR047C	-	-	No change
YCR047W-A	-	-	No change
YCR048W	-	-	No change
YCR049C	-	-	No change
YCR050C	-	-	No change
YCR051W	-	-	No change
YCR052W	-	-	No change
YCR053W	-	-	No change
YCR054C	-	-	No change
YCR057C	-	-	No change
YCR059C	-	-	No change
YCR060W	-	-	No change
YCR061W	-	-	No change
YCR063W	-	+	No change
YCR064C	-	+	No change
YCR065W	-	+	up
YCR066W	-	-	No change
YCR067C	+	-	No change
YCR068W	+	+	No change
YCR069W	+	+	No change
YCR071C	-	-	No change
YCR072C	-	-	No change
YCR073C	+	-	No change
YCR073W-A	+	-	down
YCR075C	-	-	No change
YCR075W-A	-	-	No change
YCR076C	-	-	No change
YCR077C	-	-	No change
YCR079W	-	-	No change
YCR081C-A	-	-	No change
YCR081W	-	-	No change
YCR082W	-	-	No change
YCR083W	-	-	down
YCR084C	+	+	No change
YCR085W	+	+	No change
YCR086W	+	+	No change
YCR087C-A	-	-	No change
YCR087W	-	-	No change
YCR088W	-	-	No change
YCR089W	-	-	up
YCR090C	-	-	No change
YCR091W	-	-	down
YCR092C	-	-	No change
YCR093W	-	-	No change
YCR094W	-	-	No change
YCR095C	-	-	No change
YCR095W-A	-	-	No change
YCR096C	-	-	No change
YCR097W	-	-	down
YCR097W-A	-	-	No change
YCR098C	-	-	No change
YCR099C	-	-	No change
YCR100C	-	-	No change
YCR101C	-	-	No change
YCR102C	-	+	No change
YCR102W-A	+	-	No change
YCR104W	-	-	down
YCR105W	-	-	No change
YCR106W	-	-	No change
YCR107W	-	-	No change
YCR108C	+	+	No change
YDL001W	-	-	No change
YDL002C	-	-	No change
YDL003W	-	-	up
YDL004W	-	-	No change
YDL005C	-	-	No change
YDL006W	-	-	No change
YDL007C-A	-	-	No change
YDL007W	-	-	No change
YDL008W	-	-	No change
YDL009C	-	-	No change
YDL010W	-	-	No change
YDL011C	-	-	No change
YDL012C	-	-	No change
YDL013W	-	+	No change
YDL014W	-	+	No change
YDL015C	-	-	No change
YDL016C	-	-	No change
YDL017W	-	-	No change
YDL018C	-	-	No change
YDL019C	-	-	down
YDL020C	+	+	No change
YDL021W	-	-	down
YDL022C-A	-	+	No change
YDL022W	+	+	No change
YDL023C	+	-	No change
YDL024C	-	+	No change
YDL025C	-	-	down
YDL025W-A	-	-	down
YDL026W	-	-	No change
YDL027C	-	-	No change
YDL028C	-	-	No change
YDL029W	-	-	No change
YDL030W	-	-	No change
YDL031W	-	-	No change
YDL032W	-	-	No change
YDL033C	-	-	No change
YDL034W	-	-	down
YDL035C	-	-	No change
YDL036C	-	-	No change
YDL037C	+	+	No change
YDL039C	+	+	No change
YDL040C	+	+	No change
YDL041W	-	-	No change
YDL042C	-	-	No change
YDL043C	-	-	No change
YDL044C	-	-	No change
YDL045C	-	-	No change
YDL045W-A	-	-	No change
YDL046W	-	-	No change
YDL047W	+	+	No change
YDL048C	+	+	No change
YDL049C	+	+	No change
YDL050C	-	-	No change
YDL051W	-	-	No change
YDL052C	-	-	No change
YDL053C	-	-	No change
YDL054C	-	-	No change
YDL055C	-	+	No change
YDL056W	-	-	No change
YDL057W	-	-	No change
YDL058W	-	-	No change
YDL059C	-	-	No change
YDL060W	-	-	No change
YDL061C	-	-	No change
YDL062W	-	-	No change
YDL063C	-	-	No change
YDL064W	-	-	No change
YDL065C	-	-	No change
YDL066W	-	-	No change
YDL067C	-	-	No change
YDL068W	-	-	No change
YDL069C	-	-	No change
YDL070W	-	-	No change
YDL071C	-	-	No change
YDL072C	-	-	No change
YDL073W	-	+	No change
YDL074C	-	+	No change
YDL075W	+	+	No change
YDL076C	-	-	No change
YDL077C	-	-	No change
YDL078C	-	-	No change
YDL079C	-	-	No change
YDL080C	-	-	No change
YDL081C	-	-	No change
YDL082W	-	-	No change
YDL083C	-	-	No change
YDL084W	-	-	No change
YDL085C-A	-	-	up
YDL085W	-	-	No change
YDL086C-A	-	-	No change
YDL086W	-	-	No change
YDL087C	-	-	No change
YDL088C	-	-	No change
YDL089W	-	-	No change
YDL090C	-	-	up
YDL091C	-	-	No change
YDL092W	-	-	No change
YDL093W	-	-	No change
YDL094C	-	-	No change
YDL095W	-	-	No change
YDL096C	-	-	No change
YDL097C	-	-	No change
YDL098C	-	-	No change
YDL099W	-	-	No change
YDL100C	-	-	No change
YDL101C	-	-	No change
YDL102W	-	-	No change
YDL103C	-	-	No change
YDL104C	-	-	No change
YDL105W	-	-	No change
YDL106C	-	-	No change
YDL107W	-	-	No change
YDL108W	-	-	No change
YDL109C	-	-	No change
YDL110C	-	-	No change
YDL111C	+	-	No change
YDL112W	-	-	No change
YDL113C	-	-	down
YDL114W	-	-	No change
YDL114W-A	-	-	No change
YDL115C	-	-	No change
YDL116W	-	-	No change
YDL117W	-	-	No change
YDL118W	-	-	No change
YDL119C	-	-	No change
YDL120W	-	-	No change
YDL121C	-	-	No change
YDL122W	-	-	No change
YDL123W	-	-	No change
YDL124W	-	-	down
YDL125C	-	-	No change
YDL126C	-	-	No change
YDL127W	+	+	No change
YDL128W	-	-	No change
YDL129W	-	+	No change
YDL130W	+	-	No change
YDL130W-A	-	+	down
YDL131W	-	-	No change
YDL132W	-	-	No change
YDL133C-A	-	-	No change
YDL133W	-	-	No change
YDL134C	-	-	No change
YDL135C	-	-	No change
YDL136W	-	-	No change
YDL137W	-	-	No change
YDL138W	-	+	No change
YDL139C	-	-	No change
YDL140C	-	-	No change
YDL141W	-	-	No change
YDL142C	-	-	No change
YDL143W	-	-	No change
YDL144C	-	-	No change
YDL145C	-	-	No change
YDL146W	-	-	No change
YDL147W	-	-	No change
YDL148C	-	-	No change
YDL149W	-	-	No change
YDL150W	-	-	No change
YDL151C	-	-	No change
YDL152W	-	-	No change
YDL153C	-	-	No change
YDL154W	-	-	No change
YDL155W	-	-	No change
YDL156W	-	-	No change
YDL157C	-	-	No change
YDL158C	-	-	No change
YDL159C-B	-	-	No change
YDL159W	-	-	No change
YDL159W-A	-	-	No change
YDL160C	-	-	No change
YDL160C-A	-	-	No change
YDL161W	-	-	No change
YDL162C	-	-	No change
YDL163W	-	-	No change
YDL164C	-	-	No change
YDL165W	-	-	No change
YDL166C	-	-	No change
YDL167C	-	-	No change
YDL168W	-	-	No change
YDL169C	-	-	No change
YDL170W	+	+	No change
YDL171C	+	+	No change
YDL172C	-	-	No change
YDL173W	-	-	No change
YDL174C	-	-	No change
YDL175C	-	-	No change
YDL176W	-	-	No change
YDL177C	-	-	No change
YDL178W	-	-	No change
YDL179W	-	-	down
YDL180W	-	-	No change
YDL181W	+	+	No change
YDL182W	+	+	No change
YDL183C	-	-	No change
YDL184C	-	-	No change
YDL185C-A	-	-	down
YDL185W	-	-	No change
YDL186W	-	-	No change
YDL187C	-	-	No change
YDL188C	-	-	No change
YDL189W	-	-	No change
YDL190C	-	-	No change
YDL191W	-	+	No change
YDL192W	-	-	No change
YDL193W	-	-	No change
YDL194W	-	-	down
YDL195W	-	-	No change
YDL196W	-	-	down
YDL197C	-	-	down
YDL198C	-	-	No change
YDL199C	-	-	No change
YDL200C	-	-	No change
YDL201W	-	-	No change
YDL202W	+	-	No change
YDL203C	+	-	No change
YDL204W	-	-	down
YDL205C	-	-	No change
YDL206W	-	-	down
YDL207W	-	-	No change
YDL208W	-	-	No change
YDL209C	-	-	No change
YDL210W	-	+	up
YDL211C	-	-	No change
YDL212W	-	-	No change
YDL213C	-	-	No change
YDL214C	+	+	No change
YDL215C	-	-	No change
YDL216C	-	-	No change
YDL217C	-	-	No change
YDL218W	-	-	up
YDL219W	-	-	up
YDL220C	-	+	No change
YDL221W	+	+	No change
YDL222C	+	+	No change
YDL223C	+	+	down
YDL224C	-	-	No change
YDL225W	-	-	No change
YDL226C	-	-	No change
YDL227C	-	-	up/down
YDL228C	+	+	No change
YDL229W	+	+	No change
YDL230W	+	-	No change
YDL231C	+	-	No change
YDL232W	-	-	No change
YDL233W	-	-	No change
YDL234C	-	-	No change
YDL235C	-	-	No change
YDL236W	-	-	No change
YDL237W	-	-	No change
YDL238C	-	-	down
YDL239C	-	-	down
YDL240C-A	-	-	No change
YDL240W	-	-	up
YDL241W	-	-	up
YDL242W	-	-	up
YDL243C	-	-	up
YDL244W	-	-	up
YDL245C	-	+	No change
YDL246C	-	+	No change
YDL247W	-	-	No change
YDL247W-A	-	-	No change
YDL248W	-	-	down
YDR001C	-	+	down
YDR002W	-	+	No change
YDR003W	-	-	No change
YDR003W-A	-	-	No change
YDR004W	-	-	No change
YDR005C	-	-	No change
YDR006C	+	-	No change
YDR007W	+	-	No change
YDR008C	+	+	No change
YDR009W	-	+	No change
YDR010C	+	+	No change
YDR011W	+	+	No change
YDR012W	+	+	No change
YDR013W	+	+	No change
YDR014W	-	-	No change
YDR014W-A	-	-	No change
YDR015C	-	-	No change
YDR016C	-	-	No change
YDR017C	-	-	No change
YDR018C	-	-	down
YDR019C	-	-	No change
YDR020C	-	-	No change
YDR021W	-	-	No change
YDR022C	-	+	No change
YDR023W	-	+	No change
YDR024W	-	-	up
YDR025W	-	-	No change
YDR026C	-	-	No change
YDR027C	-	-	No change
YDR028C	-	-	No change
YDR029W	-	-	No change
YDR030C	-	-	No change
YDR031W	-	-	No change
YDR032C	-	-	No change
YDR033W	+	+	No change
YDR034C	-	+	No change
YDR034C-A	-	-	No change
YDR034C-C	-	-	No change
YDR034C-D	-	-	up
YDR034W-B	-	-	No change
YDR035W	-	-	No change
YDR036C	-	-	No change
YDR037W	-	-	No change
YDR038C	-	-	No change
YDR039C	-	-	No change
YDR040C	+	+	No change
YDR041W	-	+	No change
YDR042C	-	-	up
YDR043C	-	+	No change
YDR044W	-	-	No change
YDR045C	-	-	No change
YDR046C	-	-	up
YDR047W	-	-	No change
YDR048C	-	-	No change
YDR049W	-	-	No change
YDR050C	+	-	No change
YDR051C	-	-	No change
YDR052C	-	-	No change
YDR053W	-	-	No change
YDR054C	-	+	No change
YDR055W	-	+	up
YDR056C	-	-	No change
YDR057W	-	-	No change
YDR058C	-	-	No change
YDR059C	-	-	No change
YDR060W	-	-	No change
YDR061W	-	+	No change
YDR062W	-	-	No change
YDR063W	-	-	down
YDR064W	+	+	No change
YDR065W	+	+	No change
YDR066C	-	-	No change
YDR067C	-	-	No change
YDR068W	-	-	No change
YDR069C	-	-	No change
YDR070C	-	-	No change
YDR071C	-	-	No change
YDR072C	+	+	No change
YDR073W	+	+	No change
YDR074W	+	+	down
YDR075W	-	-	No change
YDR076W	-	-	No change
YDR077W	+	+	No change
YDR078C	+	+	No change
YDR079C-A	-	-	No change
YDR079W	-	-	No change
YDR080W	-	-	No change
YDR081C	-	-	No change
YDR082W	-	-	No change
YDR083W	-	-	No change
YDR084C	-	-	No change
YDR085C	-	-	No change
YDR086C	-	-	No change
YDR087C	-	-	No change
YDR088C	-	-	No change
YDR089W	-	-	No change
YDR090C	-	-	No change
YDR091C	-	-	No change
YDR092W	-	-	No change
YDR093W	+	+	No change
YDR094W	+	+	No change
YDR095C	+	+	No change
YDR096W	+	+	No change
YDR097C	-	-	No change
YDR098C	-	-	No change
YDR098C-A	-	-	No change
YDR098C-B	-	-	up
YDR099W	-	-	No change
YDR100W	-	-	No change
YDR101C	-	-	No change
YDR102C	-	-	No change
YDR103W	-	-	No change
YDR104C	-	-	No change
YDR105C	-	-	No change
YDR106W	-	-	No change
YDR107C	-	-	No change
YDR108W	-	-	No change
YDR109C	-	-	No change
YDR110W	-	-	No change
YDR111C	-	-	No change
YDR112W	-	-	No change
YDR113C	-	-	up
YDR114C	-	-	No change
YDR115W	-	-	No change
YDR116C	-	-	No change
YDR117C	-	-	No change
YDR118W	-	-	No change
YDR118W-A	-	-	No change
YDR119W	-	-	No change
YDR119W-A	-	-	No change
YDR120C	-	-	No change
YDR121W	-	-	No change
YDR122W	-	-	No change
YDR123C	-	-	No change
YDR124W	-	-	No change
YDR125C	-	-	No change
YDR126W	-	-	No change
YDR127W	-	-	No change
YDR128W	-	-	No change
YDR129C	-	-	down
YDR130C	-	-	No change
YDR131C	-	-	No change
YDR132C	-	-	No change
YDR133C	+	+	up
YDR134C	+	+	up
YDR135C	-	-	No change
YDR136C	-	-	No change
YDR137W	-	-	No change
YDR138W	-	-	No change
YDR139C	-	-	No change
YDR140W	-	-	No change
YDR141C	-	-	No change
YDR142C	-	-	No change
YDR143C	-	-	No change
YDR144C	-	-	No change
YDR145W	-	-	No change
YDR146C	-	-	up
YDR147W	-	-	No change
YDR148C	-	-	No change
YDR149C	-	-	No change
YDR150W	+	-	No change
YDR151C	+	+	No change
YDR152W	+	+	No change
YDR153C	+	+	No change
YDR154C	+	+	No change
YDR155C	+	+	No change
YDR156W	-	+	No change
YDR157W	-	+	No change
YDR158W	-	-	No change
YDR159W	-	-	No change
YDR160W	-	-	No change
YDR161W	-	-	No change
YDR162C	-	-	No change
YDR163W	-	-	No change
YDR164C	-	-	No change
YDR165W	-	-	No change
YDR166C	-	-	No change
YDR167W	-	-	No change
YDR168W	-	-	No change
YDR169C	-	-	No change
YDR169C-A	-	-	No change
YDR170C	-	-	No change
YDR170W-A	-	-	No change
YDR171W	+	+	down
YDR172W	-	-	No change
YDR173C	-	-	No change
YDR174W	-	-	No change
YDR175C	-	-	No change
YDR176W	-	-	No change
YDR177W	-	-	No change
YDR178W	-	-	No change
YDR179C	-	-	No change
YDR179W-A	-	-	No change
YDR180W	-	-	No change
YDR181C	-	-	No change
YDR182W	-	-	No change
YDR182W-A	-	-	No change
YDR183C-A	-	-	No change
YDR183W	-	-	No change
YDR184C	-	-	No change
YDR185C	-	-	down
YDR186C	-	+	No change
YDR187C	-	+	No change
YDR188W	-	+	No change
YDR189W	-	-	No change
YDR190C	-	-	No change
YDR191W	-	-	No change
YDR192C	-	-	No change
YDR193W	-	-	No change
YDR194C	-	-	No change
YDR194W-A	-	-	No change
YDR195W	-	-	No change
YDR196C	-	-	No change
YDR197W	-	-	No change
YDR198C	-	-	No change
YDR199W	-	-	No change
YDR200C	-	-	No change
YDR201W	-	-	No change
YDR202C	-	-	No change
YDR203W	-	-	No change
YDR204W	-	-	down
YDR205W	-	-	No change
YDR206W	-	-	No change
YDR207C	-	+	No change
YDR208W	-	+	No change
YDR209C	-	-	No change
YDR210C-C	-	-	No change
YDR210C-D	-	+	up
YDR210W	-	-	No change
YDR210W-A	-	-	No change
YDR210W-B	-	-	up
YDR211W	-	+	No change
YDR212W	-	-	No change
YDR213W	-	-	No change
YDR214W	+	+	No change
YDR215C	+	+	No change
YDR216W	+	+	No change
YDR217C	-	-	No change
YDR218C	-	-	down
YDR219C	-	-	No change
YDR220C	-	-	No change
YDR221W	-	-	No change
YDR222W	-	+	up
YDR223W	-	-	No change
YDR224C	-	-	No change
YDR225W	+	-	No change
YDR226W	+	-	No change
YDR227W	-	-	No change
YDR228C	-	-	No change
YDR229W	-	-	No change
YDR230W	-	-	No change
YDR231C	-	-	No change
YDR232W	-	-	No change
YDR233C	+	+	No change
YDR234W	+	+	No change
YDR235W	-	-	No change
YDR236C	-	-	No change
YDR237W	-	-	No change
YDR238C	-	-	No change
YDR239C	-	-	No change
YDR240C	-	-	No change
YDR241W	-	-	No change
YDR242W	-	+	No change
YDR243C	-	-	No change
YDR244W	-	-	No change
YDR245W	-	-	No change
YDR246W	-	+	No change
YDR246W-A	+	+	No change
YDR247W	+	+	No change
YDR248C	-	-	No change
YDR249C	-	-	No change
YDR250C	-	-	No change
YDR251W	-	-	No change
YDR252W	-	-	No change
YDR253C	-	-	No change
YDR254W	-	-	No change
YDR255C	-	-	No change
YDR256C	-	-	No change
YDR257C	-	-	No change
YDR258C	+	+	down
YDR259C	+	+	No change
YDR260C	+	+	No change
YDR261C	-	-	up
YDR261C-C	-	-	No change
YDR261C-D	+	-	up
YDR261W-A	-	-	No change
YDR261W-B	-	-	up
YDR262W	+	-	No change
YDR263C	-	-	No change
YDR264C	-	-	No change
YDR265W	-	-	No change
YDR266C	-	-	No change
YDR267C	-	-	No change
YDR268W	-	-	No change
YDR269C	-	-	No change
YDR270W	-	-	No change
YDR271C	-	-	No change
YDR272W	-	-	No change
YDR273W	-	-	No change
YDR274C	-	+	No change
YDR275W	-	+	No change
YDR276C	+	+	No change
YDR277C	+	+	down
YDR278C	-	+	No change
YDR279W	-	-	No change
YDR280W	-	-	No change
YDR281C	-	-	No change
YDR282C	-	-	No change
YDR283C	-	-	No change
YDR284C	-	-	No change
YDR285W	-	-	No change
YDR286C	-	-	No change
YDR287W	-	-	No change
YDR288W	-	-	No change
YDR289C	-	-	No change
YDR290W	-	-	No change
YDR291W	-	-	No change
YDR292C	-	-	No change
YDR293C	-	-	down
YDR294C	-	+	No change
YDR295C	-	-	No change
YDR296W	-	-	No change
YDR297W	-	-	No change
YDR298C	-	-	No change
YDR299W	-	-	No change
YDR300C	-	-	No change
YDR301W	-	-	No change
YDR302W	-	-	No change
YDR303C	-	-	No change
YDR304C	-	-	No change
YDR305C	-	-	No change
YDR306C	-	-	No change
YDR307W	-	-	No change
YDR308C	-	-	No change
YDR309C	+	+	up
YDR310C	-	-	No change
YDR311W	-	-	No change
YDR312W	-	-	No change
YDR313C	-	-	No change
YDR314C	-	-	No change
YDR315C	-	-	No change
YDR316W	-	-	No change
YDR316W-A	-	-	No change
YDR316W-B	-	+	No change
YDR317W	-	-	No change
YDR318W	-	-	No change
YDR319C	-	-	No change
YDR320C	-	-	No change
YDR320C-A	-	-	No change
YDR320W-B	-	-	No change
YDR321W	-	-	No change
YDR322C-A	-	-	No change
YDR322W	-	-	No change
YDR323C	-	-	No change
YDR324C	-	-	No change
YDR325W	-	-	No change
YDR326C	-	+	No change
YDR327W	-	+	No change
YDR328C	-	-	No change
YDR329C	-	-	No change
YDR330W	-	-	No change
YDR331W	-	-	No change
YDR332W	-	-	No change
YDR333C	-	-	No change
YDR334W	-	-	No change
YDR335W	-	-	No change
YDR336W	-	-	No change
YDR337W	-	-	No change
YDR338C	-	-	No change
YDR339C	-	-	No change
YDR340W	-	-	up
YDR341C	+	+	No change
YDR342C	+	+	No change
YDR343C	+	+	No change
YDR344C	+	+	No change
YDR345C	+	+	No change
YDR346C	-	-	No change
YDR347W	-	-	No change
YDR348C	-	-	No change
YDR349C	-	-	No change
YDR350C	-	-	No change
YDR351W	-	-	No change
YDR352W	-	-	No change
YDR353W	-	-	No change
YDR354C-A	-	-	No change
YDR354W	-	-	No change
YDR355C	-	-	No change
YDR356W	-	-	No change
YDR357C	-	-	No change
YDR358W	-	-	down
YDR359C	-	-	No change
YDR360W	-	-	No change
YDR361C	-	-	No change
YDR362C	-	-	No change
YDR363W	-	-	No change
YDR363W-A	-	-	No change
YDR364C	-	-	No change
YDR365C	-	-	up
YDR365W-A	-	-	No change
YDR365W-B	-	-	up
YDR366C	-	-	up
YDR367W	-	-	No change
YDR368W	-	-	No change
YDR369C	-	-	No change
YDR370C	-	-	No change
YDR371C-A	-	-	No change
YDR371W	-	-	No change
YDR372C	-	-	No change
YDR373W	-	-	No change
YDR374C	-	-	up
YDR374W-A	-	-	No change
YDR375C	-	-	No change
YDR376W	-	-	No change
YDR377W	-	-	No change
YDR378C	+	-	No change
YDR379C-A	+	+	No change
YDR379W	+	-	No change
YDR380W	+	+	up
YDR381C-A	+	+	No change
YDR381W	+	+	No change
YDR382W	-	+	No change
YDR383C	+	+	No change
YDR384C	+	+	No change
YDR385W	+	+	No change
YDR386W	-	-	No change
YDR387C	-	-	No change
YDR388W	-	-	No change
YDR389W	-	-	No change
YDR390C	-	-	No change
YDR391C	-	-	down
YDR392W	-	-	No change
YDR393W	-	-	No change
YDR394W	-	-	No change
YDR395W	-	-	No change
YDR396W	-	+	No change
YDR397C	-	+	No change
YDR398W	-	-	No change
YDR399W	+	+	No change
YDR400W	+	+	up
YDR401W	-	-	No change
YDR402C	-	-	No change
YDR403W	-	-	No change
YDR404C	+	+	No change
YDR405W	+	+	No change
YDR406W	+	+	No change
YDR406W-A	-	-	No change
YDR407C	-	-	No change
YDR408C	-	-	No change
YDR409W	-	-	No change
YDR410C	-	-	up
YDR411C	-	-	No change
YDR412W	-	-	No change
YDR413C	-	-	No change
YDR414C	-	-	No change
YDR415C	-	-	No change
YDR416W	-	-	No change
YDR417C	-	-	No change
YDR418W	-	-	No change
YDR419W	-	-	No change
YDR420W	-	-	No change
YDR421W	-	-	No change
YDR422C	-	-	No change
YDR423C	-	-	No change
YDR424C	-	-	No change
YDR425W	-	-	No change
YDR426C	-	-	No change
YDR427W	-	-	No change
YDR428C	-	-	No change
YDR429C	-	-	No change
YDR430C	-	-	No change
YDR431W	-	-	No change
YDR432W	-	-	No change
YDR433W	-	-	No change
YDR434W	-	-	No change
YDR435C	-	-	No change
YDR436W	-	-	down
YDR437W	-	-	No change
YDR438W	-	-	No change
YDR439W	-	-	No change
YDR440W	-	-	No change
YDR441C	+	+	No change
YDR442W	+	+	No change
YDR443C	+	+	No change
YDR444W	-	-	No change
YDR445C	-	-	No change
YDR446W	-	-	up
YDR447C	-	-	No change
YDR448W	-	-	No change
YDR449C	-	-	No change
YDR450W	-	-	No change
YDR451C	-	+	No change
YDR452W	-	+	No change
YDR453C	-	-	down
YDR454C	-	-	No change
YDR455C	-	-	No change
YDR456W	-	-	No change
YDR457W	-	-	No change
YDR458C	-	-	No change
YDR459C	-	-	No change
YDR460W	-	-	No change
YDR461C-A	+	-	No change
YDR461W	-	-	down
YDR462W	+	-	No change
YDR463W	-	-	No change
YDR464C-A	-	-	No change
YDR464W	-	-	No change
YDR465C	-	-	No change
YDR466W	-	-	down
YDR467C	-	-	No change
YDR468C	-	-	No change
YDR469W	-	-	No change
YDR470C	-	-	No change
YDR471W	-	-	No change
YDR472W	-	-	No change
YDR473C	-	-	No change
YDR475C	-	-	No change
YDR476C	-	-	No change
YDR477W	-	-	No change
YDR478W	-	-	No change
YDR479C	-	-	down
YDR480W	-	-	No change
YDR481C	-	-	No change
YDR482C	-	-	up
YDR483W	-	-	No change
YDR484W	-	-	No change
YDR485C	-	-	No change
YDR486C	-	-	No change
YDR487C	-	+	No change
YDR488C	-	+	No change
YDR489W	-	-	No change
YDR490C	+	+	down
YDR491C	+	+	No change
YDR492W	+	+	No change
YDR493W	-	-	No change
YDR494W	-	-	No change
YDR495C	-	-	No change
YDR496C	+	+	No change
YDR497C	+	+	No change
YDR498C	-	-	No change
YDR499W	-	-	No change
YDR500C	-	-	No change
YDR501W	+	+	No change
YDR502C	+	+	No change
YDR503C	-	-	up
YDR504C	-	-	No change
YDR505C	-	-	No change
YDR506C	-	+	No change
YDR507C	-	-	up
YDR508C	+	+	up
YDR509W	-	-	up
YDR510C-A	-	-	No change
YDR510W	+	+	No change
YDR511W	-	-	No change
YDR512C	-	-	down
YDR513W	-	-	down
YDR514C	-	-	No change
YDR515W	-	-	No change
YDR516C	-	-	down
YDR517W	-	-	No change
YDR518W	-	-	No change
YDR519W	-	-	No change
YDR520C	-	-	No change
YDR521W	-	-	No change
YDR522C	-	-	No change
YDR523C	-	-	No change
YDR524C	-	-	No change
YDR524C-A	+	+	No change
YDR524C-B	+	+	up
YDR524W-C	-	-	up
YDR525W	+	+	No change
YDR525W-A	+	+	No change
YDR526C	-	-	No change
YDR527W	+	+	No change
YDR528W	+	-	up
YDR529C	-	-	No change
YDR530C	-	-	No change
YDR531W	-	-	No change
YDR532C	-	-	No change
YDR533C	-	-	No change
YDR534C	-	-	No change
YDR535C	+	+	No change
YDR536W	+	+	No change
YDR537C	-	-	No change
YDR538W	-	-	No change
YDR539W	-	-	up
YDR540C	-	-	up
YDR541C	-	-	No change
YDR542W	-	-	No change
YDR543C	+	+	No change
YDR544C	+	+	No change
YDR545C-A	-	-	No change
YDR545W	+	+	No change
YEL001C	-	-	up
YEL002C	-	-	No change
YEL003W	-	-	No change
YEL004W	-	-	No change
YEL005C	-	-	No change
YEL006W	-	-	No change
YEL007W	+	+	No change
YEL008C-A	+	+	No change
YEL008W	-	-	No change
YEL009C	+	+	No change
YEL009C-A	-	-	No change
YEL010W	-	-	No change
YEL011W	-	-	down
YEL012W	-	-	No change
YEL013W	-	-	No change
YEL014C	-	-	No change
YEL015W	-	-	No change
YEL016C	-	-	No change
YEL017C-A	+	+	No change
YEL017W	+	+	No change
YEL018C-A	-	-	No change
YEL018W	-	-	No change
YEL019C	-	-	No change
YEL020C	-	-	down
YEL020C-B	+	+	No change
YEL020W-A	-	-	No change
YEL021W	-	-	No change
YEL022W	-	-	No change
YEL023C	-	-	No change
YEL024W	-	-	No change
YEL025C	-	-	No change
YEL026W	-	-	No change
YEL027W	-	-	No change
YEL028W	-	-	No change
YEL029C	-	-	No change
YEL030C-A	-	-	No change
YEL030W	-	-	No change
YEL031W	-	-	No change
YEL032C-A	-	-	No change
YEL032W	+	+	No change
YEL033W	+	+	No change
YEL034C-A	+	+	No change
YEL034W	+	+	No change
YEL035C	+	+	No change
YEL036C	+	+	No change
YEL037C	+	+	No change
YEL038W	-	-	No change
YEL039C	-	-	down
YEL040W	-	+	up
YEL041W	-	-	No change
YEL042W	-	-	No change
YEL043W	-	-	No change
YEL044W	-	+	No change
YEL045C	-	+	No change
YEL046C	-	+	No change
YEL047C	-	-	No change
YEL048C	-	-	No change
YEL049W	-	-	down
YEL050C	-	-	No change
YEL050W-A	-	-	No change
YEL051W	-	-	No change
YEL052W	-	-	No change
YEL053C	-	-	No change
YEL053W-A	-	-	No change
YEL054C	-	-	No change
YEL055C	+	-	No change
YEL056W	-	-	No change
YEL057C	-	-	down
YEL058W	-	-	No change
YEL059C-A	-	-	No change
YEL059W	+	+	No change
YEL060C	+	+	No change
YEL061C	-	-	No change
YEL062W	+	-	No change
YEL063C	+	-	No change
YEL064C	-	-	No change
YEL065W	-	-	up
YEL066W	-	-	No change
YEL067C	-	-	No change
YEL068C	-	-	No change
YEL069C	-	+	No change
YEL070W	-	-	down
YEL071W	-	-	No change
YEL072W	-	-	No change
YEL073C	-	-	down
YEL074W	-	-	No change
YEL075C	-	-	No change
YEL075W-A	-	-	No change
YEL076C	-	-	No change
YEL076C-A	-	-	No change
YEL077C	+	+	No change
YEL077W-A	+	+	No change
YER001W	-	-	No change
YER002W	-	-	No change
YER003C	-	-	up
YER004W	-	-	No change
YER005W	-	-	No change
YER006C-A	-	-	No change
YER006W	-	-	No change
YER007C-A	-	-	No change
YER007W	-	-	No change
YER008C	-	-	No change
YER009W	-	-	No change
YER010C	-	-	No change
YER011W	-	+	up
YER012W	-	-	No change
YER013W	-	-	No change
YER014C-A	-	-	No change
YER014W	-	-	No change
YER015W	-	-	No change
YER016W	-	-	No change
YER017C	-	+	No change
YER018C	-	+	up
YER019C-A	-	-	No change
YER019W	-	+	No change
YER020W	-	-	No change
YER021W	-	-	No change
YER022W	-	-	No change
YER023C-A	-	-	No change
YER023W	-	-	No change
YER024W	-	-	No change
YER025W	-	-	No change
YER026C	-	-	No change
YER027C	-	-	No change
YER028C	+	-	No change
YER029C	-	-	No change
YER030W	-	-	No change
YER031C	-	-	No change
YER032W	-	-	No change
YER033C	-	-	No change
YER034W	-	-	No change
YER035W	-	-	No change
YER036C	+	+	No change
YER037W	+	+	No change
YER038C	-	-	No change
YER038W-A	-	-	No change
YER039C	-	-	No change
YER039C-A	-	-	No change
YER040W	-	-	No change
YER041W	-	-	No change
YER042W	-	-	No change
YER043C	-	-	up
YER044C	-	-	No change
YER044C-A	-	-	No change
YER045C	+	+	No change
YER046W	-	-	No change
YER046W-A	-	-	No change
YER047C	-	-	No change
YER048C	-	-	No change
YER048W-A	-	-	No change
YER049W	-	-	No change
YER050C	-	-	No change
YER051W	-	-	No change
YER052C	+	-	No change
YER053C	+	-	down
YER053C-A	+	-	No change
YER054C	+	+	down
YER055C	+	+	No change
YER056C	+	+	No change
YER056C-A	-	-	No change
YER057C	-	-	No change
YER058W	-	-	No change
YER059W	-	-	No change
YER060W	-	-	No change
YER060W-A	-	-	No change
YER061C	-	-	No change
YER062C	-	+	No change
YER063W	-	+	No change
YER064C	-	-	No change
YER065C	-	+	No change
YER066C-A	-	-	down
YER066W	-	-	No change
YER067C-A	-	-	down
YER067W	-	-	down
YER068C-A	-	-	No change
YER068W	-	-	No change
YER069W	-	-	No change
YER070W	+	-	up/down
YER071C	-	-	No change
YER072W	-	-	No change
YER073W	-	+	No change
YER074W	-	-	No change
YER074W-A	-	-	No change
YER075C	-	-	No change
YER076C	-	-	No change
YER076W-A	-	-	No change
YER077C	-	-	No change
YER078C	-	-	No change
YER078W-A	-	-	No change
YER079C-A	-	-	No change
YER079W	-	-	down
YER080W	-	-	No change
YER081W	-	-	No change
YER082C	-	-	No change
YER083C	-	-	No change
YER084W	-	-	down
YER084W-A	-	-	down
YER085C	-	-	down
YER086W	-	-	No change
YER087C-A	-	-	No change
YER087C-B	-	-	No change
YER087W	-	-	No change
YER088C	+	+	No change
YER088C-A	+	+	No change
YER088W-B	+	+	No change
YER089C	-	-	No change
YER090C-A	-	-	No change
YER090W	+	-	No change
YER091C	+	+	No change
YER091C-A	-	+	No change
YER092W	-	+	No change
YER093C	-	-	No change
YER093C-A	-	-	No change
YER094C	-	+	No change
YER095W	-	+	No change
YER096W	-	-	No change
YER097W	-	-	No change
YER098W	-	-	No change
YER099C	-	-	No change
YER100W	-	-	No change
YER101C	-	-	No change
YER102W	-	+	No change
YER103W	-	+	No change
YER104W	-	-	No change
YER105C	-	-	No change
YER106W	-	-	No change
YER107C	-	-	No change
YER107W-A	-	-	No change
YER109C	-	-	No change
YER110C	-	-	No change
YER111C	-	-	No change
YER112W	-	+	No change
YER113C	-	-	No change
YER114C	-	-	No change
YER115C	-	-	No change
YER116C	-	-	down
YER117W	-	-	No change
YER118C	-	-	up
YER119C	-	-	No change
YER119C-A	-	-	No change
YER120W	-	-	No change
YER121W	-	-	No change
YER122C	-	-	No change
YER123W	-	-	No change
YER124C	-	+	up/down
YER125W	-	+	No change
YER126C	-	-	No change
YER127W	-	-	No change
YER128W	-	-	No change
YER129W	-	-	No change
YER130C	-	-	No change
YER131W	-	-	No change
YER132C	-	-	No change
YER133W	-	-	No change
YER133W-A	-	-	No change
YER134C	-	-	No change
YER135C	-	-	No change
YER136W	-	-	No change
YER137C	+	+	No change
YER137C-A	-	-	No change
YER137W-A	-	-	No change
YER138C	-	-	No change
YER138W-A	-	-	up
YER139C	-	-	No change
YER140W	-	-	No change
YER141W	-	-	No change
YER142C	-	-	No change
YER143W	-	-	No change
YER144C	-	-	No change
YER145C	+	+	up
YER145C-A	-	-	No change
YER146W	+	+	No change
YER147C	-	-	No change
YER147C-A	-	-	No change
YER148W	-	-	No change
YER148W-A	-	-	No change
YER149C	+	+	No change
YER150W	+	+	No change
YER151C	-	-	No change
YER152C	-	-	No change
YER152W-A	-	-	No change
YER153C	-	-	No change
YER154W	-	-	No change
YER155C	-	-	No change
YER156C	-	-	No change
YER157W	-	-	No change
YER158C	-	+	No change
YER158W-A	-	+	No change
YER159C	-	-	No change
YER159C-A	-	-	No change
YER160C	-	-	No change
YER161C	-	-	No change
YER162C	-	-	No change
YER163C	-	-	No change
YER164W	-	-	No change
YER165C-A	-	-	No change
YER165W	-	-	No change
YER166W	-	-	No change
YER167W	-	-	No change
YER168C	+	+	No change
YER169W	+	+	down
YER170W	-	-	No change
YER171W	-	-	No change
YER172C	-	-	No change
YER172C-A	-	-	No change
YER173W	-	-	No change
YER174C	-	-	No change
YER175C	-	-	No change
YER175W-A	-	-	No change
YER176W	-	-	No change
YER177W	+	-	No change
YER178W	-	-	No change
YER179W	-	-	No change
YER180C	-	-	No change
YER180C-A	-	-	No change
YER181C	-	-	No change
YER182W	-	-	No change
YER183C	-	-	No change
YER184C	+	+	No change
YER185W	+	+	No change
YER186C	-	-	No change
YER187W	-	-	down
YER188C-A	+	+	down
YER188W	-	-	down
YER189W	+	+	No change
YER190C-A	-	-	No change
YER190C-B	+	+	No change
YER190W	-	-	No change
YFL001W	-	-	No change
YFL002C	-	-	No change
YFL002W-A	-	-	No change
YFL002W-B	-	-	No change
YFL003C	-	-	No change
YFL004W	-	-	No change
YFL005W	-	-	No change
YFL007W	-	-	No change
YFL008W	-	-	up
YFL009W	-	-	No change
YFL010C	-	-	No change
YFL010W-A	-	-	No change
YFL011W	-	-	up
YFL012W	-	-	up
YFL012W-A	-	-	No change
YFL013C	+	+	No change
YFL013W-A	+	+	No change
YFL014W	+	+	down
YFL015C	+	+	No change
YFL015W-A	+	+	No change
YFL016C	+	+	No change
YFL017C	-	-	No change
YFL017W-A	-	+	No change
YFL018C	-	+	No change
YFL019C	-	-	No change
YFL020C	-	-	No change
YFL021C-A	-	-	No change
YFL021W	-	-	No change
YFL022C	-	+	No change
YFL023W	-	-	No change
YFL024C	-	-	No change
YFL025C	+	-	No change
YFL026W	+	-	down
YFL027C	-	-	No change
YFL028C	-	-	No change
YFL029C	-	-	No change
YFL030W	+	-	No change
YFL031C-A	+	-	No change
YFL031W	+	+	No change
YFL032W	+	+	No change
YFL033C	+	+	No change
YFL034C-A	-	-	No change
YFL034C-B	-	-	No change
YFL034W	-	-	No change
YFL036W	-	+	No change
YFL037W	-	-	No change
YFL038C	-	-	No change
[truncated: 4,686 more rows]
