# Supplementary material for: Msn2/4 regulate expression of glycolytic enzymes and control transition from quiescence to growth
Source: eLife. 2017 Sep 26;6:e29938. doi: 10.7554/eLife.29938 (PMC5634782; doi:10.7554/eLife.29938)
Supplement: Figure 4—source data 3. [file elife-29938-fig4-data3.xlsx]

## Sheet: Ox_stressgene_cls
systematic	NAME	biological_process	molecular_function	Glucose_Starvation_0	Glucose_Starvation_30	Glucose_Starvation_90	Glucose_Starvation_270	Glucose_Starvation_1440	Glucose_Starvation_2880	Glucose_Starvation_4320	Glucose_Starvation_5760	Glucose_Starvation_11520	Nitrogen_Starvation_0	Nitrogen_Starvation_30	Nitrogen_Starvation_90	Nitrogen_Starvation_270	Nitrogen_Starvation_1440	Nitrogen_Starvation_2880	Nitrogen_Starvation_4320	Nitrogen_Starvation_5760	Nitrogen_Starvation_11520	Phosphate_Starvation_0	Phosphate_Starvation_30	Phosphate_Starvation_90	Phosphate_Starvation_270	Phosphate_Starvation_1440	Phosphate_Starvation_2880	Phosphate_Starvation_4320	Phosphate_Starvation_5760	Phosphate_Starvation_11520	Glucose_Limitation_0.05	Glucose_Limitation_0.1	Glucose_Limitation_0.015	Glucose_Limitation_0.2	Glucose_Limitation_0.25	Glucose_Limitation_0.3	Nitrogen_Limitation_0.05	Nitrogen_Limitation_0.1	Nitrogen_Limitation_0.015	Nitrogen_Limitation_0.2	Nitrogen_Limitation_0.25	Nitrogen_Limitation_0.3	Phosphate_Limitation_0.05	Phosphate_Limitation_0.1	Phosphate_Limitation_0.015	Phosphate_Limitation_0.2	Phosphate_Limitation_0.25	Phosphate_Limitation_0.3	YMC_T1
YBR008C	FLR1	transport*	transporter activity*	0	-0.33	-0.02	-0.39	1.12	1.57	1.91	1.89	1.71	-0.02	0.72	1.05	1.95	2.81	2.48	2.19	2.14	2.02	-0.095	-0.175	-0.225	0.805	2.285	2.195	1.985	1.515	1.805	0.08	0.16	-0.27	-0.22	-0.12	0.1	0.56	0.34	0.35	0.1	0.32	0.43	-0.5	-0.57	-0.61	-0.47	-0.5	-0.48	1.03494
YBR063C	YBR063C	biological_process	molecular_function	0	-0.47	-0.28	-0.32	0.89	1.56	1.94	2.12	2.2	0.07	0.33	0.54	0.91	1.23	1.18	1.13	1.09	1.24	0.27	-0.02	-0.09	0.41	1.56	1.67	1.77	1.74	1.95	0.03	0.08	-0.13	-0.32	-0.27	-0.18	0.12	0.06	0.33	0.42	0.2	-0.15	0.55	0.3	0.39	0.12	0.17	0.03	0.576475
YBR105C	VID24	transport*	molecular_function	0	1.34	0.24	-0.74	1.16	1.54	2.42	2.85	3.14	0.595	2.255	2.355	2.915	2.395	2.055	2.005	1.885	2.215	-0.065	-0.015	0.075	1.465	1.875	1.735	1.805	1.955	2.325	-0.35	-0.71	-1.15	-1.16	-0.42	0.09	0.61	0.74	0.18	-0.32	-0.27	0.19	1.76	1.75	1.77	1.86	2.05	2.21	-0.149547
YBR114W	RAD16	response to DNA damage stimulus*	nucleotide binding*	0	0.93	0.13	-0.5	1.61	2.49	2.8	3.19	4.04	0.145	1.095	1.495	2.075	2.525	2.595	2.595	2.535	2.815	0.095	0.215	0.265	0.825	1.965	2.165	2.185	2.215	2.555	0.36	0.24	0.62	0.53	0.36	0.36	0.81	0.75	0.61	0.56	0.72	0.64	0.905	0.645	0.505	0.415	0.225	0.245	0.28
YBR208C	DUR1,2	metabolic process*	nucleotide binding*	0	-1.73	-1.49	0.16	0.04	0.91	0.55	0.81	1.83	1.05	2.26	2.49	3.36	4.9	5.1	4.83	4.65	4.06	0.62	0.62	0.06	0.48	-0.09	-0.07	-0.06	0.01	0.41	0.25	-0.15	0.31	0.17	0.1	0.15	4.41	3.76	3.11	2.86	2.56	2.62	-0.48	-0.6	-0.92	-0.93	-1.6	-1.68	0.202144
YBR240C	THI2	transcription*	metal ion binding*	0	-0.07	0.42	0.84	1.23	1.07	0.75	0.95	0.29	-0.045	0.435	0.625	1.385	1.365	1.315	1.285	1.245	1.065	-0.175	-0.215	0.205	1.065	2.065	1.565	1.575	1.495	1.355	0.25	0.41	0.09	-0.16	-0.04	0.02	-0.06	-0.03	0.18	0.33	-0.06	-0.19	0.48	0.3	0	-0.02	-0.21	-0.15	-0.322434
YBR257W	POP4	rRNA processing*	ribonuclease activity*	0	-0.44	-0.21	0.34	1.06	1.2	1.56	1.61	1.75	-0.05	-0.55	0.33	0.45	0.79	0.72	0.78	0.95	1	0.215	-0.005	-0.015	0.195	0.555	0.855	0.875	1.065	0.745	0.81	0.7	0.23	0.11	0.24	0.39	0.36	0.75	1.13	0.76	0.45	0.25	0.405	0.275	0.245	0.145	0.095	0.225	0.33
YCL025C	AGP1	transport*	amino acid transmembrane transporter activity*	0	-0.21	-0.62	-0.41	0.67	2.71	2.7	3.39	5.28	-0.385	-0.475	-0.005	1.995	2.075	2.605	2.405	2.285	2.715	-0.38	-0.5	-0.52	-0.6	1.53	1.53	1.8	2	2.91	1.43	1.3	0.28	0.02	-0.96	-0.89	-2.13	-2.19	-2.69	-2.72	-2.76	-2.64	-0.95	-1.36	-1.38	-1.16	-1.05	-0.9	-0.338672
YDL013W	SLX5	telomere maintenance*	zinc ion binding*	0	-0.04	0.03	0.21	0.81	0.95	1.13	1.22	1.6	-0.235	-0.085	0.435	0.645	1.175	1.365	1.295	1.345	1.355	-0.04	0.08	0.12	0.54	1.43	1.56	1.7	1.67	1.82	0.78	0.53	0.61	0.4	0.17	0.24	1.39	0.98	0.2	0.03	-0.02	0.01	0.37	0.36	-0.01	-0.19	-0.3	-0.37	0.05
YDL048C	STP4	biological_process	molecular_function*	0	3.29	2.54	1.04	2.92	2.67	2.58	2.38	1.91	-0.235	0.865	1.685	3.245	4.435	4.105	3.695	3.575	3.475	0.075	0.395	0.845	2.005	5.135	5.625	5.605	5.825	5.895	0.41	0.14	0.08	0.59	0.57	-0.09	0.96	0.33	-0.82	-0.8	-0.9	-0.63	1.92	1.23	0.82	0.49	0.64	0.3	0.960923
YDL057W	YDL057W	biological_process	molecular_function	0	1.74	1.46	0.99	1.57	0.98	0.87	0.7	0.07	0.295	2.815	2.135	2.035	2.075	2.125	2.175	2.205	1.945	-0.18	-0.04	0.29	1.31	1.74	2.09	2.1	1.97	1.76	0.18	0.12	0.33	0.21	0.05	-0.19	1.39	1.13	0.49	0.64	0.49	0.42	0.12	-0.09	-0.12	-0.44	-0.38	-0.49	0.595116
YDL210W	UGA4	transport*	amino acid transmembrane transporter activity*	0	-1.35	-0.67	-0.01	-0.27	0.85	1.02	2.58	3.58	1.395	3.775	2.605	4.105	4.135	4.705	5.035	4.795	4.765	-0.515	-0.345	-0.735	0.145	-0.265	0.315	0.055	-0.395	0.325	0.25	-0.14	-0.37	-0.35	-0.05	0.24	2.16	1.3	0.65	0.59	0.49	0.99	-0.925	-1.165	-1.155	-0.755	-0.955	-0.815	0.0230526
YDR006C	SOK1	cAMP-mediated signaling	molecular_function	0	0.23	0.31	0.92	1.99	2.05	2.11	2.18	2.48	0.135	-0.065	0.625	1.295	1.705	1.655	1.515	1.415	1.175	0.25	0.17	0.06	0.47	1.48	1.68	1.68	1.53	1.61	0.73	0.56	0.53	0.47	0.2	0.08	1.16	0.81	0.04	0.14	-0.18	-0.03	0.375	0.295	0.125	-0.015	-0.015	0.085	0.547693
YDR217C	RAD9	cell cycle*	protein binding	0	-0.96	-0.69	-0.28	0.26	0.52	0.64	0.71	0.76	0.115	-0.385	-0.075	0.325	0.775	0.845	0.655	0.615	0.675	0.31	-0.09	-0.02	0.14	1.01	1.21	1.33	1.45	1.4	0.15	-0.05	-0.25	-0.56	-0.17	-0.17	0.64	0.38	0.32	0.24	0.29	-0.04	1.14	1.11	0.96	0.86	0.85	0.89	0.37
YDR281C	PHM6	response to drug	molecular_function	0	-3.06	-1.96	-1.69	-2.46	-2.31	-2.37	-2.35	-1.93	-0.26	-0.27	0.42	0.77	0.47	0.34	0.18	0.08	-0.03	1.37	3.17	4.4	6.43	6.49	6.5	6.53	6.23	6.04	0.63	0.43	0.06	-0.32	0.07	0.28	1.89	2.14	2.11	1.82	1.14	1.02	4.12	4.12	4.12	4.12	4.12	3.94	-0.268795
YDR391C	YDR391C	biological_process	molecular_function	0	2.14	1.12	0.41	0.66	0.32	0.15	0.1	-0.64	0.66	3.8	2.04	2.01	1.51	1.3	1.22	1.23	0.96	0.17	0.6	0.59	1.37	1.65	1.28	1.54	1.79	1.55	0.48	0.43	0.35	0.1	-0.03	-0.16	0.97	0.95	1.3	0.75	0.75	0.35	1.265	1.215	0.925	0.805	0.605	0.745	-0.0126515
YDR441C	APT2	biological_process*	molecular_function*	0	-0.29	0.21	0.19	1.48	1.45	1.43	0.7	0.73	0.105	-1.255	-0.085	0.885	1.115	1.135	1.095	0.965	0.905	0.26	0.05	0.05	-0.36	0.68	0.73	0.67	0.75	0.83	-0.23	-0.26	-0.33	-0.08	-0.08	-0.33	0.52	0.61	0.18	-0.14	-0.29	-0.32	-0.225	-0.115	-0.245	0.155	0.045	0.035	0.0626393
YDR460W	TFB3	transcription*	metal ion binding*	0	0.16	0.18	0.34	1.2	1.56	2.12	2.32	2.69	0.12	0.59	0.56	0.65	0.96	1.07	1.08	1.16	1.28	0.215	0.315	0.365	0.365	0.675	0.835	0.885	1.035	0.865	0.88	0.48	0.23	0.14	0.04	0.02	0.72	0.63	0.49	0.38	0.21	-0.05	0.89	0.71	0.46	0.24	0.12	-0.22	-0.390855
YDR464W	SPP41	regulation of transcription, DNA-dependent*	molecular_function*	0	-1.11	-0.22	0.14	1.2	1.7	1.8	1.84	2.72	-0.07	-0.3	0.36	0.51	0.99	1.25	1.23	1.23	1.44	0.135	0.045	0.265	0.465	0.925	1.105	1.305	1.385	1.525	-0.02	-0.14	0.2	0.05	-0.11	-0.16	1.25	0.81	0.11	0.34	0.37	-0.01	0.445	0.505	0.365	0.125	0.075	-0.065	-0.31
YDR533C	HSP31	biological_process*	hydrolase activity*	0	2.41	2.21	0.81	2.67	2.02	2.52	2.05	1.95	0.07	1.3	2.99	3.88	4.04	3.9	3.98	3.84	4.17	-0.175	0.255	1.515	3.535	3.295	3.175	3.175	3.125	2.985	-0.46	-0.48	-1.25	-0.78	-0.44	-0.27	-0.14	-0.42	-0.12	-0.17	-0.56	-0.34	2.795	3.105	2.855	2.535	2.095	1.745	1.63592
YER013W	PRP22	mRNA processing*	nucleotide binding*	0	0.1	0.04	-0.06	0.59	0.58	0.63	0.61	0.71	0.05	0.77	0.55	0.81	0.96	0.87	0.77	0.65	0.48	0.195	0.305	0.305	0.655	0.995	1.045	1.155	1.175	1.185	0.02	0.09	0.16	0.03	-0.07	0.02	0.62	0.62	0.41	0.35	0.24	0.07	0.395	0.475	0.145	0.065	0.075	0.095	0.27
YER045C	ACA1	regulation of transcription, DNA-dependent*	DNA binding*	0	1.22	1.14	0.2	2.47	2.43	2.78	2.77	2.56	-0.055	0.495	1.035	2.445	2.455	2.815	2.925	2.975	3.055	-0.615	-0.505	-0.415	0.415	1.745	2.075	2.475	2.365	2.455	-0.23	0	0.06	-0.51	-0.19	-0.47	1.63	0.77	-0.24	-0.62	-0.31	-0.52	1.62	1.17	0.98	0.95	1.21	0.33	-0.644489
YER066W	YER066W	biological_process	molecular_function	0	1.71	1.46	1.39	2.53	2.48	2.68	2.67	2.46	0.13	1.73	1.34	1.48	1.47	1.6	1.59	1.66	1.7	0.055	0.315	0.245	0.515	1.415	1.545	1.565	1.435	1.665	0.75	1.01	0.61	0.35	0.49	0.25	-0.01	0.04	0.59	0.46	0.29	-0.07	0.8	0.74	0.73	0.84	0.62	0.63	0.184439
YER066W	YER066W	biological_process	molecular_function	0	1.71	1.46	1.39	2.53	2.48	2.68	2.67	2.46	0.13	1.73	1.34	1.48	1.47	1.6	1.59	1.66	1.7	0.055	0.315	0.245	0.515	1.415	1.545	1.565	1.435	1.665	0.75	1.01	0.61	0.35	0.49	0.25	-0.01	0.04	0.59	0.46	0.29	-0.07	0.8	0.74	0.73	0.84	0.62	0.63	0.184439
YER072W	VTC1	protein folding*	molecular_function	0	-0.2	-0.11	-0.54	-0.66	-0.63	-0.78	-1.17	-0.36	-0.185	0.385	-0.055	-0.305	-0.245	-0.055	-0.045	-0.085	-0.285	0.775	1.725	2.545	2.795	2.135	2.235	2.775	2.795	2.915	0.11	0.07	0.28	0.07	0.17	0.23	0.33	0.7	0.98	0.93	0.83	0.68	3.545	3.375	3.125	2.965	2.395	2.365	-0.183675
YER114C	BOI2	establishment of cell polarity*	phospholipid binding	0	-0.7	-0.43	-0.11	0.72	1.1	1.32	1.65	2.17	0.05	0.03	0.45	0.69	1.17	1.05	1.01	1.02	0.89	0.21	-0.14	0.05	0.25	0.87	1.04	1.17	1.25	1.2	0.09	-0.04	0.17	0.02	-0.12	-0.21	1.21	0.8	0.34	0.1	0.05	0.01	0.105	0.175	0.085	0.035	-0.045	-0.125	0.77
YER158C	YER158C	biological_process	molecular_function	0	1.73	1.57	1.24	1.6	1.65	1.52	1.55	1.2	0.26	1.81	2.22	2.67	2.07	2.25	2.15	2.14	1.95	-0.265	0.155	0.445	1.885	2.345	2.335	2.315	2.285	2.175	0.28	0.54	0.86	0.78	0.21	-0.25	2.33	1.76	0.44	0.53	0.27	0.03	1.595	1.465	1.065	1.055	0.595	0.645	-0.673522
YER169W	RPH1	transcription*	metal ion binding*	0	0.95	0.56	0.32	1.95	2.06	2.31	2.62	2.62	-0.01	0.33	1.19	1.99	2.34	2.22	2.12	2.04	2.04	0.075	-0.285	0.225	1.465	2.455	2.725	2.755	2.715	2.765	0.3	0.07	0.4	0.22	-0.23	-0.21	1.14	0.79	0.32	0.23	0.29	0.04	0.57	0.54	0.16	-0.02	-0.24	-0.77	0.748314
YGL090W	LIF1	response to DNA damage stimulus*	chromatin binding	0	0.34	0.34	0.1	0.73	0.97	1.15	1.02	1.39	-0.095	0.205	0.145	0.345	0.705	0.855	0.835	0.755	0.835	0.005	-0.065	-0.135	0.565	1.365	1.425	1.475	1.535	1.565	0.09	0.4	0.17	-0.03	-0.08	0.08	0.15	0.25	0.76	0.24	0.56	-0.03	0.83	0.87	0.66	0.71	0.6	0.11	0.614083
YGL131C	SNT2	biological_process	metal ion binding*	0	0.52	0.14	-0.33	0.17	0.91	0.96	1.59	1.38	-0.045	0.875	-0.155	0.015	0.345	0.395	0.235	0.435	0.745	-0.105	-0.145	0.025	0.515	1.235	1.535	1.565	2.045	1.575	0.25	-0.2	0.01	0.28	-0.24	-0.08	1.07	0.81	0.31	0.26	0.12	0.04	0.295	0.115	0.025	-0.075	0.175	-0.125	1.13174
YGL133W	ITC1	transcription*	molecular_function	0	0.09	0.17	0.06	0.85	1	1.01	0.74	1.01	0.14	0.02	0.35	0.72	1.22	1.16	1.09	1.03	1.1	0.3	0.28	0.43	0.58	1.35	1.61	1.73	1.73	1.77	0.08	-0.01	-0.05	-0.17	-0.22	-0.26	0.81	0.24	0.11	0.23	0.12	-0.18	1.36	1.18	1.1	0.82	0.69	0.52	0.949817
YGL144C	ROG1	lipid metabolic process*	hydrolase activity*	0	-0.55	-0.13	0.44	1.24	1.22	1.28	1.2	1.63	0.12	0.17	0.44	1.12	1.56	1.65	1.65	1.68	1.65	0.23	0.07	0.14	0.75	1.32	1.34	1.42	1.58	1.61	0.78	0.64	0.32	0.15	-0.2	0.02	0.8	0.62	0.5	0.56	0.3	0.13	1.045	0.725	0.455	0.245	0.185	0.235	0.573624
YGL163C	RAD54	response to DNA damage stimulus*	nucleotide binding*	0	0.43	0.3	-0.23	0.51	1.22	1.62	1.88	2.38	0.12	0.83	0.73	0.72	1.67	1.56	1.56	1.48	1.64	0.125	0.255	0.415	0.215	0.765	1.295	1.685	1.635	1.565	0.31	-0.16	-0.39	-0.2	-0.17	-0.13	1.38	0.78	0.31	0.29	0.36	-0.03	1.105	1.095	0.885	0.675	0.935	0.935	-0.05
YGR087C	PDC6	branched chain family amino acid catabolic process*	transferase activity*	0	2.9	4.8	3.77	6.93	6.78	6.6	6.22	5.04	2.26	6.34	7.78	8.34	8.96	8.76	8.88	9.02	8.73	-0.165	-0.175	0.635	5.555	6.865	6.535	6.475	6.005	6.305	1.22	0.6	0.34	-0.38	0.59	-0.21	4.15	2.67	0.66	0.93	0.61	0.73	5.14	3.77	2.3	1.64	1.51	1.24	0.872178
YGR097W	ASK10	transcription*	transcription regulator activity	0	0.15	-0.43	-0.91	0.46	0.78	0.7	0.85	0.56	-0.27	-0.37	-0.11	0.41	1.22	1.22	1.28	1.25	1.26	-0.325	-0.165	-0.335	-0.385	1.005	1.685	2.015	2.075	1.985	-0.44	-0.73	-0.49	-0.71	-0.26	-0.14	0.27	-0.32	-1.22	-1.36	-1.14	-0.68	-0.41	-0.76	-0.93	-0.85	-0.61	-0.4	0.612947
YGR121C	MEP1	transport*	ammonium transmembrane transporter activity	0	-2.05	-0.29	-0.01	1.03	1.47	1.2	0.94	0.99	0.12	-1.1	-0.65	0.53	1.15	0.76	0.36	0.46	0.23	0.39	0.05	-0.67	-0.15	0.23	0.43	0.61	0.68	0.85	0.32	-0.23	0.24	0.06	-0.14	-0.22	2.88	2.32	0.98	0.74	0.46	0.6	1.925	1.755	1.295	1.285	0.935	1.145	0.0985
YGR240C	PFK1	glycolysis	nucleotide binding*	0	-0.2	0.15	-0.5	0.46	0.9	0.74	0.24	-0.63	0.315	-0.065	-0.155	0.545	0.545	0.595	0.425	0.405	0.365	0.18	0.31	0.59	0.87	1.06	0.84	1.41	1.94	1.54	-0.6	-1.12	-0.8	-0.45	-0.22	-0.06	0.83	0.74	0.12	-0.1	-0.03	0.16	1.475	1.365	1.055	0.805	0.785	0.755	1.19092
YIL167W	SDL1	metabolic process*	catalytic activity*	0	0.09	0.21	-0.08	0.52	0.87	0.85	0.74	0.81	0.57	2.71	1.44	1.44	1.13	1.3	1.14	1.1	1.11	-0.32	-0.08	-0.21	0.27	0.76	0.51	0.58	0.66	0.49	0.43	0.43	0.1	0	0	0.13	2.08	1.77	1.93	1.83	1.49	1.26	-0.43	-0.36	-0.49	-0.69	-0.46	-0.66	-1.05
YIR029W	DAL2	purine base metabolic process*	hydrolase activity*	0	-1.45	-0.05	1.02	-0.03	0.33	0.27	0.28	0.55	1.1	1.14	1.32	0.91	1.13	1.58	1.68	1.8	1.75	-0.115	0.045	-0.865	-0.785	-0.175	-0.185	-0.185	-0.155	-0.155	0.12	0.33	0.92	0.69	0.72	0.39	3.58	3.38	2.88	3.05	2.89	3.18	-0.65	-0.54	-0.76	-0.74	-0.88	-0.85	-0.528443
YJR046W	TAH11	pre-replicative complex assembly*	*	0	-1.2	-1.12	-0.94	0.48	0.75	0.87	1.19	1.49	-0.175	-1.565	-0.865	0.215	1.225	1.415	1.265	1.295	1.445	0.17	0.29	-0.05	0.12	1.52	1.6	1.51	1.33	0.91	0.55	-0.03	-0.22	-0.14	0.02	0.19	0.26	-0.47	-1.01	-0.93	-0.47	0.01	0.125	-0.135	-0.265	-0.345	-0.105	0.105	1.0998
YJR050W	ISY1	mRNA processing*	RNA splicing factor activity, transesterification mechanism	0	0.41	0.26	0.21	0.95	1.21	1.6	1.89	1.98	-0.07	0.2	0.48	0.74	1.06	1.03	0.97	0.98	1.1	0.205	0.205	0.155	0.455	0.845	1.185	1.165	1.205	1.095	0.7	0.45	0.25	0.3	-0.12	-0.15	0.34	0.49	0.75	0.67	0.27	-0.31	-0.25	-0.26	-0.41	-0.45	-0.67	-1.01	-0.0106776
YJR078W	BNA2	NAD biosynthetic process	metal ion binding*	0	0.1	0.89	1.67	1.39	1.73	1.95	2.04	2.46	0.19	1.28	1.3	1.12	1.5	1.96	2.01	1.9	1.82	0.045	-0.055	-0.015	1.545	2.135	1.675	1.595	1.665	1.955	0.33	-0.17	0.11	-0.31	-0.49	-0.11	1.46	0.71	-0.43	-0.41	-0.47	0.02	-0.095	0.205	-0.395	-0.305	-0.425	-0.625	0.11037
YJR119C	JHD2	histone demethylation	metal ion binding*	0	0.83	0.97	1.02	1.9	2.02	1.94	2.13	2.04	0.145	0.175	0.955	1.795	1.765	1.555	1.375	1.315	1.235	0.28	0.28	0.29	1.03	2.21	2.4	2.44	2.52	2.58	0.27	0.38	0.07	0.13	0.31	0.34	0.22	0.26	0.54	0.53	0.28	0.25	1.44	1.21	0.97	1.05	0.92	1.09	0.350384
YJR155W	AAD10	response to toxin*	oxidoreductase activity*	0	-0.02	0.41	0.53	3.39	3.86	4.42	4.24	3.97	-0.23	-0.39	0.73	3.45	5.55	5.41	5.42	5.44	5.95	-0.415	-0.525	-0.385	1.145	4.865	5.435	5.255	5.355	5.425	1.29	1.05	1.21	0.42	0.11	0.15	1.19	0.77	0.29	-0.1	-0.15	-0.11	0.725	0.195	-0.415	-0.755	-0.985	-1.015	-0.0328431
YLL027W	ISA1	telomere maintenance*	molecular_function	0	-0.29	0.4	1.32	1.04	1.33	1.54	1.9	2.29	-0.01	0.16	0.38	0.97	1.16	1.25	1.2	1.1	1.21	-0.085	-0.095	-0.275	0.385	0.655	0.505	0.605	0.525	0.485	1.49	1.16	0.8	0.71	0.21	0.3	0.99	0.47	0.07	0.15	-0.03	0.02	0.57	0.56	0.47	0.04	-0.09	-0.48	-0.129013
YLL052C	AQY2	water transport	water channel activity	0	-0.67	-0.43	-0.35	1.26	1.82	1.25	0.68	0.83	-0.37	-0.67	-0.08	0.5	0.34	0.25	0.13	0.09	4.44e-16	-0.085	-0.375	-0.345	1.345	0.845	0.995	1.545	2.025	1.945	-0.47	0.12	-0.24	0.04	-0.76	-1.59	-0.63	-1.12	-2.08	-2.12	-2.87	-1.96	2.515	3.115	2.745	2.775	2.475	1.935	-0.040663
YLL067C	YLL067C	biological_process	nucleotide binding*	0	1.15	1.31	1.55	2.9	3.04	3.25	2.8	3.12	0.11	0.8	1.1	1.59	2.46	2.7	2.99	2.73	2.62	-0.14	0.33	0.71	1.4	1.91	2.08	2.29	2.13	2.1	1.66	1.26	1.08	0.89	0.41	0.21	3.44	2.59	0.8	0.24	0.03	-0.2	1.88	1.79	1.35	0.87	0.83	0.45	0
YLL067C	YLL067C	biological_process	nucleotide binding*	0	1.15	1.31	1.55	2.9	3.04	3.25	2.8	3.12	0.11	0.8	1.1	1.59	2.46	2.7	2.99	2.73	2.62	-0.14	0.33	0.71	1.4	1.91	2.08	2.29	2.13	2.1	1.66	1.26	1.08	0.89	0.41	0.21	3.44	2.59	0.8	0.24	0.03	-0.2	1.88	1.79	1.35	0.87	0.83	0.45	0
YLL067C	YLL067C	biological_process	nucleotide binding*	0	1.15	1.31	1.55	2.9	3.04	3.25	2.8	3.12	0.11	0.8	1.1	1.59	2.46	2.7	2.99	2.73	2.62	-0.14	0.33	0.71	1.4	1.91	2.08	2.29	2.13	2.1	1.66	1.26	1.08	0.89	0.41	0.21	3.44	2.59	0.8	0.24	0.03	-0.2	1.88	1.79	1.35	0.87	0.83	0.45	0
YLL067C	YLL067C	biological_process	nucleotide binding*	0	1.15	1.31	1.55	2.9	3.04	3.25	2.8	3.12	0.11	0.8	1.1	1.59	2.46	2.7	2.99	2.73	2.62	-0.14	0.33	0.71	1.4	1.91	2.08	2.29	2.13	2.1	1.66	1.26	1.08	0.89	0.41	0.21	3.44	2.59	0.8	0.24	0.03	-0.2	1.88	1.79	1.35	0.87	0.83	0.45	0
YLR004C	THI73	transport	transporter activity	0	-0.23	0.32	1.56	3.61	3.52	3.63	3.92	3.99	-0.17	1.11	0.94	2.09	2.92	2.97	2.69	2.91	2.44	-0.3	-0.36	-0.24	0.09	3.03	2.53	1.81	1.57	1.42	0.72	0.52	-0.12	-0.47	-0.19	-0.14	1.15	0.54	0.07	0.13	-0.07	-0.18	1.015	0.035	-0.585	-0.615	-0.745	-0.135	-0.106417
YLR024C	UBR2	ubiquitin cycle*	metal ion binding*	0	0.89	0.47	0.37	0.69	0.67	0.42	0.12	0.18	-0.125	0.895	0.785	0.885	1.985	1.775	1.625	1.545	1.265	0.2	0.36	0.67	1.1	1.53	1.77	1.81	1.66	1.84	0.93	0.35	0.59	0.42	0.23	0.11	0.94	0.46	0.76	0.68	0.45	0.3	1.74	1.42	1.62	1.6	1.42	1.41	0.731869
YLR032W	RAD5	telomere maintenance*	nucleotide binding*	0	-0.45	-0.15	-0.07	0.85	1.16	1.33	1.33	1.19	0.145	-0.115	0.145	0.555	1.295	1.305	1.165	1.225	1.255	0.265	0.285	0.345	0.265	0.715	0.785	0.925	1.055	1.115	0.1	0.17	-0.31	-0.2	-0.02	0.16	0.19	-0.01	-0.18	-0.05	-0.09	0.01	0.87	0.86	0.62	0.75	0.65	0.65	0.260473
YLR044C	PDC1	pyruvate metabolic process*	transferase activity*	0	-0.09	-0.16	-1.16	0.88	0.56	0.09	-1.12	-3.16	0.17	-0.49	0.1	0.35	1.25	1.12	1.43	1.58	1.56	0.045	-0.925	-0.115	0.045	0.155	0.415	0.785	0.795	0.505	-0.41	-1.81	-1.38	-1.02	-0.4	-0.2	1.87	1.54	0.13	-0.27	-0.24	-0.23	3.545	3.465	2.685	2.565	2.445	2.425	0.807624
YLR099C	ICT1	biological_process*	molecular_function*	0	0.08	0.53	0.36	1.28	1.24	1.66	1.92	2.22	0.37	1.93	1.91	1.39	1.15	1.44	1.51	1.66	1.74	0	0.1	0.95	1.26	0.94	0.84	0.87	1.02	1.28	0.92	0.86	0.89	0.9	-0.1	-0.11	1.54	1.29	0.07	0.13	-0.08	0.43	0.485	0.415	0.285	0.025	0.085	0.095	0.0415561
YLR107W	REX3	rRNA processing*	hydrolase activity*	0	0.18	-0.04	-0.17	0	0.04	-0.02	-0.09	-0.02	0.13	0.16	0.39	0.3	0.54	0.54	0.6	0.71	0.81	0.145	0.165	0.205	1.125	1.655	1.785	1.725	1.865	2.195	0.55	0.58	0.26	-0.04	0	0.06	-0.68	-0.43	0.64	0.84	0.52	-0.12	1.435	1.125	1.025	0.865	0.495	0.345	-0.328417
YLR142W	PUT1	glutamate biosynthetic process*	oxidoreductase activity*	0	-0.95	-0.82	-0.3	0.7	1.08	0.87	2.04	2.91	1.775	5.175	4.255	4.335	3.665	3.515	3.485	3.395	3.525	0.245	0.475	-0.015	1.145	1.345	1.495	1.095	1.375	1.605	1.64	1	2.29	1.96	0.84	0.33	4.96	4.78	3.23	3.37	3.34	3.32	-0.79	-1.31	-1.7	-2.12	-1.46	-1.73	0.231465
YLR173W	YLR173W	biological_process	molecular_function	0	0.95	0.79	0.74	2.12	2.28	2.64	2.77	2.79	-0.43	0.27	0.28	1.06	1.8	1.93	1.94	1.95	1.81	-0.36	-0.56	-0.43	1.04	2.29	2.6	2.59	2.56	2.52	0.13	0.21	0.31	0.09	-0.15	-0.64	0.78	0.29	-0.01	0	-0.13	-0.23	-0.485	-0.355	-0.385	-0.435	-0.585	-0.995	1.40575
YLR248W	RCK2	protein amino acid phosphorylation*	nucleotide binding*	0	0.48	0.35	0.09	0.41	0.36	0.39	0.47	0.34	-0.125	1.225	1.025	1.005	0.675	0.665	0.785	0.865	0.795	-0.435	-0.265	-0.135	0.695	0.805	0.685	0.695	0.835	0.775	-0.1	-0.31	-0.18	-0.1	-0.31	-0.62	0.89	0.59	0.47	0.05	0.13	-0.23	0.155	0.065	-0.265	-0.385	-0.485	-0.355	1.02515
YLR257W	YLR257W	biological_process	molecular_function	0	1.77	1.2	0.29	0.96	1.09	1	0.97	1.3	0.79	3.34	3.14	3.51	3.29	3.3	3.09	3.1	3.31	-0.11	0.43	0.57	1.75	1.3	1.02	1.04	0.81	0.99	0.7	0.67	1.16	0.92	0.05	-0.25	3.38	2.4	1.84	1.52	1.29	0.79	-0.16	-0.05	0.02	-0.21	-0.3	-1.31	0.478027
YLR278C	YLR278C	biological_process*	molecular_function*	0	0.22	0.36	0.4	1.27	1.69	1.65	1.85	2.07	0.075	0.145	0.375	0.735	0.865	0.905	0.875	0.825	0.865	0.15	0.31	0.29	0.74	1.14	1.51	1.68	1.59	1.6	0.78	0.56	0.75	0.58	0.44	0.23	0.96	0.73	0.29	-0.17	-0.12	0.18	0.17	0	-0.39	-0.23	-0.35	-0.13	0.0248295
YLR326W	YLR326W	biological_process	molecular_function	0	-0.24	0.34	0	0.8	1.04	1.54	1.79	1.97	-0.26	0.21	0.18	0.69	0.99	0.94	0.97	0.93	0.76	-0.32	-0.45	-0.59	-0.14	0.95	0.94	0.99	1.07	0.82	0	0	-0.6	-0.48	-0.13	-0.01	-0.1	-0.32	-0.43	-0.28	-0.41	-0.61	1.1	0.71	0.59	0.57	0.48	0.22	-1.57288
YML006C	GIS4	intracellular signaling cascade*	molecular_function	0	-0.49	-0.6	-0.07	-0.22	0.02	0.09	0.39	0.65	0.105	0.465	0.395	1.045	1.615	1.445	1.285	1.205	1.265	0.235	0.065	0.015	0.225	1.085	1.255	1.255	1.405	1.355	-0.07	-0.06	0.24	0.23	-0.12	-0.05	0.68	0.54	0.47	0.51	0.2	-0.05	0.8	0.48	0.23	0.24	0.07	-0.1	-0.574195
YML035C	AMD1	nucleotide metabolic process*	hydrolase activity*	0	0.88	0.58	-0.12	0.47	0.14	0.25	-0.61	-0.54	0.135	0.285	0.615	1.515	1.335	0.675	0.495	0.405	-0.075	0.42	0.66	0.81	1.36	1.87	1.59	1.53	1.9	1.38	0.19	-0.15	-0.14	0.16	0.14	0.12	0.79	0.53	0.14	-0.18	0.02	0.11	1.48	1.27	1.32	0.81	0.95	1.04	-0.211466
YML121W	GTR1	transport*	nucleotide binding*	0	0.07	0.12	0.05	0.54	0.51	0.43	0.15	-0.2	0.15	0.83	0.69	0.95	0.41	0.37	0.33	0.23	0.23	0.195	0.475	0.505	1.085	1.575	1.435	1.465	1.445	1.425	0.33	0.29	0.3	0.22	0.1	0.12	0.43	0.25	0.89	0.82	0.79	0.39	1.225	0.985	0.785	0.685	0.635	0.265	0.186531
YML133C	YML133C	biological_process	nucleotide binding*	0	0.47	1.15	1.22	2.37	2.78	2.99	2.43	2.47	0.18	1.1	0.93	1.9	2.59	2.78	2.84	3.02	2.95	-0.065	0.355	0.355	1.045	3.005	2.845	3.225	3.275	2.965	1.06	0.9	0.83	0.81	0.51	0.35	2.9	1.97	0.57	0.12	0.16	0.04	1.015	0.995	0.785	0.415	0.495	0.425	0
YMR096W	SNZ1	pyridoxine biosynthetic process*	protein binding	0	-0.28	0.51	1.38	2.91	3.2	3.78	3.46	3.78	0.76	0.11	0.29	1.68	1.41	1.62	1.66	1.76	1.82	0.125	0.045	-0.885	0.755	2.205	1.535	1.295	1.335	1.235	3.71	3.53	1.85	0.43	0.05	1.02	0.39	-0.62	-0.3	-0.47	-0.31	0.2	-0.49	-1.41	-1.45	-1.92	-1.64	-1.29	-0.377859
YMR173W-A	YMR173W-A	biological_process	molecular_function	0	2.19	1.15	0.53	1.13	0.9	0.34	-0.29	-1.1	0.39	2.17	2.38	2.24	1.85	1.59	1.51	1.13	1.05	-0.295	0.515	1.735	3.285	2.815	2.555	2.515	2.255	2.525	0.89	0.69	1.23	1.18	0.17	-0.45	1.48	1.07	0.95	0.91	0.56	0.43	2.405	2.335	2.005	1.525	1.075	0.675	1.40574
YMR227C	TAF7	transcription*	transcription factor activity*	0	-0.3	0.07	0.25	0.81	1.06	1.32	1.29	2.19	0.075	0.235	0.585	0.645	1.015	1.235	1.325	1.375	1.505	0.18	0.15	0.26	0.61	0.8	0.94	1.09	1.31	1.24	0.59	0.17	0.65	0.45	0.24	0.25	1.79	1.22	0.18	-0.01	0.1	0.17	-0.21	-0.18	-0.41	-0.61	-0.54	-0.63	-0.07
YNL023C	FAP1	biological_process*	metal ion binding*	0	-1.4	-0.88	-0.44	0.3	0.83	0.95	1.5	1.8	-0.07	-1.24	-0.42	0.36	0.99	1.12	1.05	1.09	1.25	0.215	-0.325	-0.295	-0.075	0.865	1.135	1.135	1.425	1.265	0.28	0.12	-0.1	-0.14	-0.01	0.21	0.49	0.15	-0.09	-0.26	-0.21	-0.15	-0.295	-0.325	-0.335	-0.535	-0.285	-0.175	0.468209
YNL140C	YNL140C	biological_process	molecular_function	0	0	0.01	0.04	0.63	0.77	0.81	1.06	1.08	0.04	0.11	0.2	0.3	0.68	0.69	0.69	0.67	0.62	0.19	0.22	0.33	0.45	0.97	1.04	1.15	1.07	1.21	0.2	0.25	0.16	0.13	-0.01	-0.07	0.96	0.44	0.24	0.12	0.08	-0.03	0.655	0.585	0.505	0.585	0.345	0.315	-0.36
YNL224C	SQS1	nuclear mRNA splicing via U2-type spliceosome	molecular_function*	0	0.22	-0.11	-0.17	0.35	0.45	0.57	0.62	0.75	0.075	0.435	0.155	0.065	0.385	0.405	0.385	0.305	0.505	0.28	0.45	0.63	1.03	1.36	1.63	1.8	1.73	1.75	0.12	-0.01	0.1	-0.01	-0.21	-0.01	0.77	0.68	0.57	0.31	0.32	-0.23	0.765	0.995	0.725	0.685	0.605	0.225	0.627897
YNL234W	YNL234W	response to stress	iron ion binding*	0	-0.15	-0.43	-0.94	0.25	0.39	1.26	1.52	2.11	0.28	0.59	1.67	2.48	2.65	2.42	2.54	2.76	2.81	0.35	0.18	0.19	1.62	1.94	1.91	1.75	1.69	1.74	0.29	-0.06	0.13	0.37	0.31	0.21	1.38	1.7	1.68	1.3	1.36	1.33	0.59	0.58	0.51	0.71	0.14	-0.4	0.0883829
YNL240C	NAR1	iron-sulfur cluster assembly	iron hydrogenase activity	0	-1.12	-0.37	0.23	1.28	1.99	2.28	2.94	3.64	-0.1	-1.42	-0.17	0.85	1.35	1.68	1.77	1.82	1.89	-0.08	-0.63	-1.01	-0.36	0.69	0.76	0.66	0.61	0.74	0.47	0.61	0.54	0.49	0.33	0.32	0.68	0.43	-1.08	-0.77	-0.82	0.19	-1.275	-1.175	-1.275	-1.085	-0.645	-0.615	0.317482
YNL250W	RAD50	telomere maintenance*	nucleotide binding*	0	0.4	0.45	0.31	0.98	1.12	1.24	1.32	1.26	-0.035	0.465	0.465	0.745	1.555	1.505	1.435	1.435	1.175	0.12	-0.02	0.15	0.76	1.43	1.78	1.86	1.85	1.83	0.97	0.36	0.29	-0.03	-0.1	0.14	0.86	0.59	0.54	0.8	0.45	-0.04	0.68	0.45	0.24	0.2	-0.04	-0.41	1.35503
YNR014W	YNR014W	biological_process	molecular_function	0	2.21	0.28	-1.62	-0.27	-0.47	-0.55	-0.56	-0.09	0.215	2.035	2.645	2.515	2.255	1.785	1.625	1.665	1.515	0.275	1.555	1.655	2.215	2.305	1.985	1.835	1.625	1.845	-0.72	-1.3	-1.35	-0.94	0.35	0.43	0.71	0.6	-0.57	-0.29	-0.49	-0.12	2.115	2.185	1.845	2.355	1.865	2.255	-1.10478
YOL045W	PSK2	protein amino acid phosphorylation*	nucleotide binding*	0	-1.53	-1.72	-1.38	0.83	1.22	1.8	1.86	1.72	0.265	0.545	0.955	1.415	1.855	2.065	2.225	2.205	2.515	0.315	0.125	0.145	0.255	0.985	1.455	1.765	1.975	1.925	0.5	-0.1	0.57	0.35	-0.2	0.01	1.29	1.16	0.86	0.76	0.58	0.41	-0.98	-0.91	-0.94	-0.94	-0.64	-0.5	0.43
YOL054W	PSH1	RNA elongation from RNA polymerase II promoter	molecular_function*	0	-0.94	-0.24	0.3	0.93	1.13	1.37	1.47	2.29	-0.1	-0.37	0.32	0.72	1.12	1.26	1.31	1.29	1.18	-0.11	-0.42	-0.38	0.18	0.58	0.72	0.79	0.85	0.71	0.34	0.1	0.15	0.05	-0.17	-0.22	0.69	0.36	0.21	-0.11	-0.21	-0.19	0.595	0.535	0.335	0.325	0.205	0.215	0.718757
YOL055C	THI20	thiamin biosynthetic process*	transferase activity*	0	0.74	0.82	0.94	1.59	1.22	1.02	0.89	0.7	0.065	1.155	0.995	1.525	1.515	1.215	1.145	1.085	1.225	-0.055	0.025	0.415	1.315	2.385	1.955	1.675	1.635	1.405	0.49	0.32	0.03	0.05	0.14	0.23	0.27	0	0.25	0.36	0.22	0.11	1.02	0.75	0.39	0.39	0.4	0.6	-0.544925
YOL078W	AVO1	regulation of cell growth*	Ras GTPase binding	0	-0.01	0.06	-0.04	0.72	0.93	1	1.11	1.48	-0.03	0.3	0.46	0.68	0.81	0.8	0.75	0.75	0.6	0.13	0.16	0.19	0.35	0.77	0.82	0.89	1.05	1.08	0.18	0.23	0.3	0.3	0.13	-0.31	1.38	1.05	0.79	0.37	0.31	0.12	0.36	0.42	0.18	0.1	0.12	-0.06	0.12
YOR043W	WHI2	cell cycle*	phosphatase activator activity	0	-0.09	0.07	0	0.14	0.58	0.6	0.63	0.75	0.09	0.77	0.75	0.86	1.11	1.09	1.12	1.11	1.31	0.095	0.285	0.345	0.685	0.975	1.325	1.355	1.385	1.415	-0.01	0.05	0.28	0.21	0.07	-0.05	0.83	0.47	0.25	0.35	0.26	0.37	0.11	-0.05	-0.12	-0.24	-0.3	-0.43	0.210756
YOR110W	TFC7	transcription*	DNA binding*	0	0.27	-0.13	-0.46	-0.08	0.24	0.6	0.49	0.76	0.15	0.44	0.16	0.47	1.43	1.59	1.88	2.05	2.26	0.165	0.295	0.385	0.385	1.195	1.445	1.585	1.745	1.625	0.01	-0.17	0.07	0.24	0.01	0.03	0.24	0.07	-0.23	-0.08	-0.07	-0.06	0.54	0.43	0.47	0.49	0.61	0.46	-0.560032
YOR283W	YOR283W	biological_process*	molecular_function*	0	-1.1	-0.77	-0.33	0.67	1.11	1.22	1.35	1.49	0.27	1.03	0.98	1.33	1.22	1.39	1.51	1.41	1.32	0.15	0.2	0.34	0.87	1.28	1.61	1.71	1.95	1.66	0.38	0.33	0.05	-0.07	0.04	0.13	1.37	1.63	1.92	1.8	1.27	0.75	0.67	0.66	0.65	0.56	0.6	0.52	-0.408911
YOR304W	ISW2	transcription*	nucleotide binding*	0	-0.29	0.35	0.3	0.98	1.02	1.26	1.34	1.63	0.35	0.2	0.11	0.82	0.95	0.4	0.66	0.71	0.47	0.53	0.24	0.4	0.68	0.73	1.11	1.17	1.27	0.92	0.26	-0.17	0.09	0.01	0.06	-0.04	0.66	0.52	0.27	0.43	0.22	-0.08	0.565	0.615	0.605	0.305	0.225	0.005	0.03
YOR338W	YOR338W	sporulation (sensu Fungi)*	molecular_function	0	0.45	1.14	1.68	3.78	3.97	3.63	3.74	3.92	0.74	2.63	3.23	4.63	4.99	5.3	5.34	5.27	5.38	0.105	-0.585	-0.485	2.465	4.415	5.005	4.965	5.065	5.145	2.5	1.48	1.3	0.83	0.26	-0.2	1.6	1.13	1.07	0.73	0.51	-0.22	2.28	1.55	1.21	0.85	0.62	0.61	0.275864
YOR344C	TYE7	transcription*	DNA binding*	0	-1.09	-1.16	-1.57	0.23	0.16	-0.27	-0.66	-0.58	0.07	-0.89	-0.58	0.22	0.19	-0.25	-0.72	-0.99	-1.3	0.255	0.445	0.655	2.785	3.855	3.445	3.685	3.565	3.885	0.54	-0.33	-0.29	-0.52	-0.54	-0.53	1.69	1.15	1.23	0.98	0.92	0.53	2.95	2.47	1.29	1.58	1.2	0.63	1.48146
YOR371C	GPB1	signal transduction*	signal transducer activity*	0	-0.22	-0.18	0.01	0.57	0.72	0.94	1.29	1.64	-0.215	-0.315	0.045	0.405	0.585	0.475	0.415	0.425	0.575	0.13	0.04	0.05	0.54	1.15	1.2	1.1	1.24	1.34	0.43	0.37	0.7	0.51	0.17	0.21	1.15	0.64	-0.13	-0.34	-0.06	0.21	0.475	0.435	0.165	0.245	0.185	0.255	1.05607
YPL026C	SKS1	protein amino acid phosphorylation*	nucleotide binding*	0	-0.04	0.77	0.43	0.59	0.99	0.65	0.88	1.39	0.285	-0.025	0.425	0.715	0.245	-0.085	-0.255	-0.265	-0.035	0.36	0.49	0.72	1.77	2.64	2.85	2.97	3.01	3.09	0.66	0.43	0	-0.01	-0.19	-0.16	1.78	1.32	0.86	0.33	-0.04	-0.09	2.785	2.545	2.045	1.745	1.265	0.885	-0.39887
YPL159C	PET20	aerobic respiration	molecular_function	0	0.47	0.35	0.32	1.7	1.84	2.14	2.03	2.22	0.17	1.44	1.66	2.09	2.15	2.18	2.23	2	2	0.01	-0.07	-0.04	1.12	2	1.93	1.96	2.07	2.05	0.81	0.51	0.4	0.53	0.13	0.04	1.56	1.39	0.96	0.59	0.3	0.15	1.02	0.95	0.54	0.42	0.33	0.19	0.426163
YPL177C	CUP9	regulation of transcription, DNA-dependent*	DNA binding*	0	0.68	0.63	0.55	0.89	0.91	0.2	0.08	-0.42	-0.155	0.415	0.825	1.065	0.965	0.815	0.615	0.565	0.545	-0.035	0.055	0.375	1.275	1.915	2.135	2.185	2.125	2.125	0.7	0.52	0.5	0.52	0.27	-0.14	1.14	0.91	0.22	0.15	-0.09	0.22	2	1.91	1.52	1.48	1.13	0.73	0.193684
YPL214C	THI6	metabolic process*	nucleotide binding*	0	0.47	0.66	0.29	0.69	0.79	0.96	1.24	1.46	0.185	1.695	0.975	0.765	0.555	0.435	0.425	0.565	1.175	-0.005	0.035	0.095	0.775	1.145	1.215	1.145	1.075	1.195	0.17	0.31	0.23	0.22	0.15	0.12	0.58	0.48	0.42	0.47	0.41	0.42	-0.175	-0.235	-0.365	-0.495	-0.415	-0.425	-0.740888
YPL229W	YPL229W	biological_process	molecular_function	0	1.05	0.83	0.83	2.17	2.26	2.5	2.88	3.06	0.12	1.3	1.55	1.7	1.81	1.58	1.66	1.51	1.68	0.135	0.045	-0.065	0.835	1.255	1.475	1.335	1.305	1.375	0.67	0.11	0.24	0.47	0.3	0.1	0.52	0.52	0.22	0.31	0	0.15	0.625	0.435	0.375	0.325	0.335	0.615	-0.536841
YPL268W	PLC1	signal transduction*	hydrolase activity*	0	-0.4	-0.06	-0.06	0.88	1.08	1.16	1.4	1.16	0.015	-0.375	-0.105	0.215	0.495	0.535	0.485	0.545	0.565	0.165	0.425	0.805	1.955	3.025	3.155	3.065	3.075	2.935	-0.01	-0.09	-0.17	-0.26	-0.27	-0.19	-0.07	0.1	0.48	0.25	0.05	-0.29	0.705	0.545	0.375	0.245	-0.055	-0.125	1.33992
YPR040W	TIP41	signal transduction*	molecular_function	0	0.28	0.27	0.66	0.99	1.05	0.95	1.13	1.5	0.105	0.465	0.815	0.865	0.775	0.745	0.785	0.815	0.745	0.15	0.21	0.33	1.15	1.34	1.26	1.33	1.26	1.26	0.48	-0.03	0.32	0.46	0.03	0.03	0.47	0.1	-0.49	-0.48	-0.17	-0.18	0.41	-0.08	-0.02	-0.16	0.02	0.16	0.245978
YPR086W	SUA7	transcription*	metal ion binding*	0	-0.39	-0.24	-0.29	0.29	0.71	0.97	1.09	1.43	0.145	-0.005	-0.055	0.345	0.635	0.695	0.685	0.715	0.915	0.17	0.12	0.04	0.23	1.14	1.45	1.4	1.73	1.54	1.04	0.95	0.44	0.2	0.09	0.19	0.69	0.32	0.65	0.23	0.14	0.01	0.79	0.78	0.81	0.72	0.77	0.37	0.18
YPR121W	THI22	thiamin biosynthetic process	phosphomethylpyrimidine kinase activity	0	0.44	0.25	0.24	1.04	0.97	1.06	1.04	1.04	0.06	0.92	0.43	0.5	0.73	0.78	0.74	0.66	0.57	0.13	0.05	0.05	0.09	1.11	1.24	1.35	1.41	1.49	0.57	0.23	0.37	0.24	0.15	-0.04	0.92	0.73	0.66	0.47	0.35	0.09	-0.41	-0.4	-0.19	-0.29	-0.12	-0.02	0.974594
YAL012W	CYS3	response to drug*	catalytic activity*	0	-0.04	-0.81	-1.82	-2.68	-3.15	-4.24	-4.7	-4.68	0.09	-0.4	-1.6	-2.87	-2.73	-2.44	-2.35	-1.89	-0.55	0.035	0.125	0.075	-1.575	-4.435	-4.235	-4.335	-4.465	-4.515	-0.68	-1.21	-0.18	0.39	0.21	0.28	-0.64	-0.17	-1.2	-0.42	-0.46	0.43	-3.16	-2.7	-2.46	-2.03	-1.28	-0.78	-0.617213
YAR015W	ADE1	response to drug*	ATP binding*	0	-2.65	-1.81	-1.33	-2.33	-2.45	-2.54	-3.09	-3.25	0.24	-2.09	-1.67	-1.73	-2.51	-2.44	-2.43	-2.52	-2.98	0.34	0.04	-0.77	-1.33	-1.95	-2.26	-2.17	-2.34	-2.31	-0.37	-0.2	-0.37	-0.23	-0.15	0.12	-0.77	-0.42	-0.2	-0.23	-0.01	-0.04	-1.185	-1.035	-0.825	-0.865	-0.545	-0.835	-0.617693
YAR073W	IMD1	biological_process	molecular_function	0	-1.25	-0.95	-0.99	-1.82	-1.91	-2.12	-2.28	-2.59	0.205	-1.265	-2.665	-3.115	-3.495	-3.045	-2.915	-2.805	-2.905	-0.045	-0.365	-1.055	-1.945	-2.785	-3.735	-3.695	-3.755	-3.945	-0.73	-0.55	-0.83	-0.47	-0.26	0.03	-1.54	-1.11	-1.54	-1.27	-0.63	0.06	-2.535	-1.775	-1.485	-1.315	-0.595	-0.555	-0.619494
YBL027W	RPL19B	translation	structural constituent of ribosome	0	-2.18	-2.34	-1.86	-1.96	-2.05	-2.15	-2.43	-2.77	0.065	-3.585	-3.055	-2.125	-2.005	-2.225	-2.195	-2.235	-2.135	0.2	-0.18	-0.61	-3.84	-3.33	-3.01	-3.17	-3.4	-2.89	-1.75	-0.96	-0.88	-0.96	-0.4	-0.25	-2.89	-2.83	-1.18	-0.88	-0.11	-0.26	-1.785	-1.445	-0.975	-0.485	-0.525	-0.805	-0.0528765
YBL042C	FUI1	transport*	nucleobase transmembrane transporter activity*	0	-3.2	-3.03	-0.67	-0.57	-0.4	-1.18	-1.61	-1.22	-0.165	-4.315	-3.295	-2.615	-3.595	-3.915	-4.085	-4.045	-3.935	-0.195	-1.015	-1.415	-2.215	-2.715	-3.125	-3.275	-3.585	-3.925	0.73	0.6	0.21	-0.03	0.48	0.69	0.88	0.86	-0.11	0.08	0.17	0.94	-1.11	-0.86	-0.83	-0.69	-0.44	-0.31	-0.01
YBL072C	RPS8A	translation	structural constituent of ribosome	0	-1.56	-1.82	-1.38	-1.4	-1.75	-2.04	-3	-3.63	0.215	-3.085	-3.605	-1.865	-2.065	-2.555	-2.695	-2.635	-2.675	0.185	0.025	-0.255	-3.735	-3.105	-3.375	-3.215	-3.545	-3.075	-1.01	-0.54	-0.48	-0.4	-0.1	-0.17	-2.81	-2.95	-0.87	-0.53	-0.15	-0.06	-1.315	-1.005	-0.465	-0.405	-0.175	-0.465	-0.4
YBL081W	YBL081W	biological_process	molecular_function	0	-1.68	-1.7	-1.38	-2.84	-2.64	-3.66	-3.93	-3.32	-0.05	-2.29	-2.15	-2.61	-3.08	-3.28	-3.13	-3.03	-2.78	0.07	-0.34	-0.41	-1.77	-3.33	-3.66	-3.52	-3.48	-3.48	-0.83	-0.98	-0.38	-0.03	0.14	0.08	-0.11	0.34	-0.9	-0.51	-0.59	0.3	-1.99	-1.85	-1.57	-1.13	-0.92	-0.35	-0.64
YBR021W	FUR4	transport*	nucleobase transmembrane transporter activity*	0	-1.03	-0.61	-0.93	-0.09	0.17	-0.96	-1.54	-1.24	-0.25	-2.47	-2.13	-2.51	-2.32	-2.84	-2.76	-3.08	-2.92	-0.37	-0.84	-1.1	-2.2	-2.42	-3.04	-3.21	-3.41	-3.21	-0.75	-0.47	-0.77	-0.35	0.06	0.01	0.46	0.35	0.11	0.16	0.21	0.33	-1.66	-1.5	-1.44	-1.04	-1.05	-0.99	-0.55
YBR048W	RPS11B	translation*	RNA binding*	0	-2.04	-2.58	-1.91	-2.4	-2.83	-3.3	-3.75	-4.49	0.015	-3.475	-4.095	-2.715	-3.105	-3.495	-3.525	-3.505	-3.695	-0.01	-0.31	-0.77	-4.34	-4.69	-4.88	-4.76	-4.85	-4.62	-1.2	-0.83	-0.84	-0.53	-0.23	-0.03	-1.92	-1.64	-0.65	-0.68	-0.26	0.07	-2.16	-1.63	-1.12	-1	-0.67	-0.58	-0.311768
YBR084W	MIS1	ribosome biogenesis and assembly*	nucleotide binding*	0	-3.5	-2.72	-2.12	-3.27	-3.15	-4	-4.77	-3.86	-0.145	-3.945	-2.985	-3.065	-3.185	-3.075	-2.735	-2.745	-2.675	0.265	0.045	-0.575	-2.535	-3.865	-2.555	-2.355	-2.425	-2.525	-0.62	-0.79	0	0.15	0.03	0.34	-0.31	-0.3	-1	-0.78	-0.45	0.22	-2.445	-1.955	-1.855	-1.805	-1.315	-1.155	-0.3
YBR220C	YBR220C	biological_process*	molecular_function	0	-1.3	-1.09	-1.15	-1.68	-1.69	-2.07	-2.11	-2.05	-0.555	-1.275	-1.515	-1.755	-1.755	-1.695	-1.605	-1.625	-1.775	-0.625	-0.825	-1.105	-1.775	-3.035	-3.585	-3.605	-3.605	-3.655	-1.06	-0.74	-0.68	-0.47	-0.36	-0.19	-0.63	-0.72	-1.36	-1.05	-0.8	-0.2	-2.895	-2.365	-2.125	-2.075	-1.695	-1.595	-1.06207
YBR220C	YBR220C	biological_process*	molecular_function	0	-1.3	-1.09	-1.15	-1.68	-1.69	-2.07	-2.11	-2.05	-0.555	-1.275	-1.515	-1.755	-1.755	-1.695	-1.605	-1.625	-1.775	-0.625	-0.825	-1.105	-1.775	-3.035	-3.585	-3.605	-3.605	-3.655	-1.06	-0.74	-0.68	-0.47	-0.36	-0.19	-0.63	-0.72	-1.36	-1.05	-0.8	-0.2	-2.895	-2.365	-2.125	-2.075	-1.695	-1.595	-1.06207
YBR252W	DUT1	nucleotide metabolic process*	hydrolase activity*	0	-1.73	-1.58	-1.31	-3.04	-3.51	-4.02	-4.34	-4.55	-0.065	-1.085	-1.195	-2.285	-2.945	-3.235	-3.345	-3.295	-3.635	0.35	0.14	0.21	-0.67	-2.71	-2.77	-2.99	-2.93	-2.86	-0.93	-0.48	-0.99	-0.75	0.01	0.14	-1.5	-1.14	-0.4	-0.41	0.03	0.03	-0.335	-0.085	0.135	0.155	0.305	0.675	-1.55101
YBR291C	CTP1	transport*	binding*	0	-2.44	-2.56	-2.05	-3	-2.75	-2.61	-2.66	-1.88	-0.065	-0.715	-2.225	-2.075	-2.345	-1.225	-1.255	-1.195	-1.225	0.015	-0.205	-0.525	-2.415	-3.555	-3.685	-3.715	-3.865	-3.955	-1.36	-1.24	-1.03	-0.63	-0.01	0.45	-2.54	-1.96	-1.35	-0.73	-0.18	0.32	-1.52	-1.33	-1.15	-0.87	-0.2	0.21	-0.400862
YCL037C	SRO9	translation*	RNA binding	0	-2.47	-2.61	-2.01	-2.29	-2.3	-2.61	-2.68	-2.51	-0.15	-4.58	-3.79	-3.02	-3.19	-3.65	-3.61	-3.68	-3.73	0.11	-0.4	-0.66	-3.69	-4.49	-4.68	-4.8	-4.81	-4.45	-0.86	-1.06	-0.2	0.05	0.24	0.39	-1.78	-0.86	-0.94	-0.91	-0.01	0.45	-0.725	-0.215	0.315	1.285	1.195	1.305	-0.11
YCR031C	RPS14A	translation*	RNA binding*	0	-2.01	-2.26	-1.7	-2.36	-2.8	-2.95	-3.29	-3.63	0.025	-3.655	-3.375	-2.295	-2.475	-2.925	-2.965	-3.075	-2.795	0.23	-0.04	-0.5	-3.57	-3.81	-3.83	-4.04	-4.01	-3.69	-1.49	-1.03	-0.76	-0.44	-0.2	-0.08	-2.85	-2.39	-1.58	-0.78	-0.53	-0.12	-2	-1.59	-0.81	-0.41	-0.33	-0.03	-0.26
YCR034W	FEN1	vesicle-mediated transport*	fatty acid elongase activity	0	-2.55	-2.04	-1.41	-2.92	-3	-3.72	-3.91	-4.26	-0.45	-2.61	-2.6	-3.53	-3.91	-3.82	-3.64	-3.61	-3.8	-0.435	-0.625	-0.825	-2.115	-4.065	-4.365	-4.335	-4.415	-4.405	-1.17	-0.94	-0.86	-0.56	-0.18	-0.28	-1.44	-0.71	-0.51	-0.24	-0.35	-0.35	-2.255	-1.785	-1.415	-1.095	-1.205	-0.885	-0.987454
YCR043C	YCR043C	biological_process	molecular_function	0	-1.7	-1.96	-1.65	-4.01	-3.81	-3.84	-3.82	-2.87	-0.07	-0.32	-1.28	-2.18	-2.81	-2.81	-2.74	-2.75	-3.04	0.145	-0.145	-0.275	-2.085	-4.295	-4.405	-4.685	-4.245	-4.395	-1.38	-0.83	-0.68	-0.36	0.19	0.3	-1.52	-0.42	0.55	0.96	0.72	1.06	-1.69	-1.46	-0.81	-0.33	-0.2	0.47	-1.29
YCR087C-A	YCR087C-A	biological_process	molecular_function*	0	-3.44	-2.85	-1.76	-2.55	-2.15	-2.89	-2.97	-2.67	-0.125	-3.655	-3.305	-2.675	-2.995	-2.865	-2.605	-2.255	-1.995	0.445	0.055	-0.495	-1.505	-2.215	-2.555	-2.565	-2.485	-2.425	-0.21	-0.06	-0.29	-0.3	0.01	0.17	-1.42	-1.04	-0.17	-0.41	0.01	-0.1	-0.145	0.005	0.015	0.195	0.255	0.435	-0.25
YDL014W	NOP1	ribosome biogenesis and assembly*	transferase activity*	0	-3.27	-2.77	-2.17	-3.11	-2.66	-3.85	-4.06	-3.21	-0.045	-5.825	-4.415	-3.895	-4.455	-4.705	-4.625	-4.585	-4.425	0.49	0.12	-0.23	-1.99	-2.87	-3.26	-3.45	-3.72	-3.5	-1.27	-1.61	-0.65	-0.1	0.21	0.34	-2.11	-1.26	-1.59	-0.83	-0.68	0.29	-1.545	-1.385	-1.055	-0.715	-0.105	0.515	-0.329955
YDL075W	RPL31A	translation	structural constituent of ribosome	0	-2.2	-2.92	-2.29	-2.8	-2.87	-2.5	-2.62	-3.79	0.035	-3.905	-4.255	-2.705	-2.575	-2.995	-2.945	-2.725	-2.575	0.26	0.17	-0.28	-4.19	-3.77	-3.55	-3.51	-3.32	-3.06	-1.38	-0.92	-0.75	-0.71	-0.23	-0.07	-3.17	-2.37	-0.66	-0.17	0.25	-0.09	-1.375	-1.145	-0.615	-0.415	-0.235	0.055	-0.361232
YDL075W	RPL31A	translation	structural constituent of ribosome	0	-2.2	-2.92	-2.29	-2.8	-2.87	-2.5	-2.62	-3.79	0.035	-3.905	-4.255	-2.705	-2.575	-2.995	-2.945	-2.725	-2.575	0.26	0.17	-0.28	-4.19	-3.77	-3.55	-3.51	-3.32	-3.06	-1.38	-0.92	-0.75	-0.71	-0.23	-0.07	-3.17	-2.37	-0.66	-0.17	0.25	-0.09	-1.375	-1.145	-0.615	-0.415	-0.235	0.055	-0.361232
YDL081C	RPP1A	translation*	structural constituent of ribosome	0	-2.18	-2.55	-2.03	-2.4	-2.65	-2.97	-2.77	-3.18	-0.265	-3.405	-3.365	-2.865	-3.125	-3.625	-3.775	-3.655	-3.475	0.21	0.01	-0.49	-3.03	-3.45	-3.69	-3.87	-4.25	-3.85	-1.71	-1.18	-1.1	-0.88	0.01	0.11	-3.29	-2.52	-1.81	-0.79	-0.4	0.23	-3.36	-3.39	-2.53	-1.97	-1.88	-1.42	-0.378912
YDL082W	RPL13A	translation	structural constituent of ribosome	0	-2.09	-2.19	-1.8	-1.95	-2	-2.54	-3.32	-3.46	0.16	-4.24	-3.49	-2.09	-2.36	-2.58	-2.56	-2.52	-2.81	0.06	-0.21	-0.63	-3.77	-3.73	-3.93	-3.48	-4.04	-3.4	-0.95	-0.53	-0.65	-0.63	-0.36	-0.2	-1.99	-1.86	-0.6	-0.49	-0.12	-0.2	-1.695	-1.295	-1.025	-0.815	-0.705	-0.795	-0.298572
YDL130W	RPP1B	translation*	structural constituent of ribosome	0	-1.95	-2.25	-1.84	-2.3	-2.78	-3.11	-3.16	-3.25	-0.2	-3.91	-3.46	-2.83	-2.72	-3.04	-3.2	-3.33	-3.34	0.315	0.125	-0.335	-3.535	-3.245	-3.255	-2.985	-3.475	-3.555	-1.81	-1.26	-0.56	-0.15	0.21	0.27	-2.45	-2.25	-1.7	-0.82	-0.22	0.33	-2.315	-1.995	-1.485	-0.615	-0.805	-0.405	-0.250163
YDL130W	RPP1B	translation*	structural constituent of ribosome	0	-1.95	-2.25	-1.84	-2.3	-2.78	-3.11	-3.16	-3.25	-0.2	-3.91	-3.46	-2.83	-2.72	-3.04	-3.2	-3.33	-3.34	0.315	0.125	-0.335	-3.535	-3.245	-3.255	-2.985	-3.475	-3.555	-1.81	-1.26	-0.56	-0.15	0.21	0.27	-2.45	-2.25	-1.7	-0.82	-0.22	0.33	-2.315	-1.995	-1.485	-0.615	-0.805	-0.405	-0.250163
YDL191W	RPL35A	translation	structural constituent of ribosome	0	-1.82	-2	-1.45	-1.58	-1.72	-2.06	-3.06	-2.99	-0.055	-3.705	-3.135	-2.095	-1.835	-2.165	-2.195	-2.265	-2.235	0.21	-0.08	-0.39	-3.39	-3.23	-2.97	-3.02	-3.13	-2.78	-1.09	-0.29	-0.27	-0.49	-0.22	-0.28	-2.84	-3.05	-1.01	-0.38	0.01	-0.28	-1.165	-1.005	-0.495	-0.155	-0.435	-0.515	-0.371244
YDR020C	YDR020C	biological_process*	molecular_function*	0	-1.87	-1.45	-1.19	-1.91	-2.05	-2.96	-3.24	-3.09	-0.035	-1.255	-1.495	-1.045	-1.695	-1.975	-2.115	-2.075	-2.525	0	-0.61	-0.9	-1.56	-2.22	-2.7	-2.84	-2.65	-2.98	-0.93	-0.44	-0.78	-0.82	-0.14	0.09	-0.67	-0.32	-0.27	-0.06	-0.02	0.16	-1.845	-1.515	-1.245	-1.045	-0.575	-0.915	-0.59
YDR037W	KRS1	translation*	nucleotide binding*	0	-1.92	-1.49	-0.87	-2.44	-2.35	-3.36	-4.18	-3.27	0.255	-2.355	-1.985	-1.265	-1.895	-1.885	-1.945	-1.985	-1.435	0.11	-0.11	-0.19	-0.98	-1.42	-2.21	-2.3	-2.69	-3.24	0.43	0.14	-0.22	-0.13	0.02	0.18	-0.16	-0.38	-0.67	-0.5	-0.1	0.19	-1.345	-1.165	-1.365	-1.595	-1.105	-0.855	-0.255299
YDR060W	MAK21	ribosome biogenesis and assembly*	molecular_function	0	-3.31	-2.49	-1.56	-1.78	-1.54	-2.56	-2.99	-2.72	0.04	-5.17	-3.41	-2.37	-2.83	-3	-3.09	-2.94	-2.92	0.445	-0.095	-0.385	-1.505	-1.845	-2.265	-2.205	-2.125	-2.135	-0.78	-0.86	-0.38	-0.47	-0.18	-0.08	-0.58	-0.29	-0.39	-0.01	0.2	0.01	-0.345	-0.245	-0.035	-0.215	0.035	-0.025	0.06
YDR064W	RPS13	translation	structural constituent of ribosome	0	-1.68	-1.97	-1.38	-1.71	-1.9	-2.64	-3.27	-3.56	0.145	-3.255	-3.585	-2.135	-2.275	-2.655	-2.815	-2.775	-2.685	0.285	0.265	-0.055	-3.685	-3.635	-3.605	-3.425	-3.575	-3.375	-0.15	-0.05	0	-0.03	0.2	0.33	-1.01	-0.51	0.06	0.12	0.2	0.45	-0.805	-0.685	-0.425	-0.035	-0.105	0.105	-0.346746
YDR101C	ARX1	ribosome biogenesis and assembly*	molecular_function*	0	-3.98	-2.61	-1.7	-2.12	-1.7	-2.69	-3.09	-2.26	0.025	-4.865	-3.925	-2.645	-3.025	-3.275	-3.285	-3.335	-3.375	0.095	-0.635	-0.965	-1.795	-1.865	-2.335	-2.275	-2.245	-2.315	-0.7	-0.77	-0.27	-0.32	0.13	0.36	-0.68	-0.63	-0.55	-0.5	-0.31	0.21	-1.08	-0.71	-0.57	-0.81	-0.2	-0.23	0.01
YDR165W	TRM82	ribosome biogenesis and assembly*	protein binding*	0	-2.97	-2.64	-1.87	-2.12	-1.84	-2.64	-2.84	-2.43	0.07	-4.28	-3.41	-2.64	-2.82	-2.87	-3.05	-3.04	-2.98	0.28	-0.25	-0.65	-2.07	-2.72	-2.93	-3.03	-3.14	-3.29	-0.95	-0.81	-0.76	-0.69	-0.19	0.14	-1.8	-0.97	-0.13	0.01	0.24	0.33	-1.525	-1.375	-0.975	-0.705	-0.465	-0.305	-0.21
YDR300C	PRO1	telomere maintenance*	transferase activity*	0	-1.82	-1.02	-0.83	-1.68	-1.63	-2.66	-3.05	-2.95	-0.005	-3.455	-2.095	-2.205	-3.045	-2.925	-2.975	-3.015	-2.925	0.17	-0.2	-0.4	-1	-1.51	-2.24	-2.59	-2.78	-2.92	-0.81	-0.41	-0.26	-0.16	0.1	0.06	-1.38	-1.52	-1.06	-1.3	-0.29	-0.12	0.02	-0.04	-0.41	-0.26	-0.4	-0.14	-0.957136
YDR309C	GIC2	establishment of cell polarity*	small GTPase regulator activity	0	-2.2	-2	-1.42	-2.76	-2.25	-2.65	-2.57	-2.19	-0.16	-0.35	-1.22	-2.42	-2.02	-1.81	-1.63	-1.52	-1.39	-0.24	-0.3	-0.44	-2.14	-3.65	-3.75	-3.83	-3.82	-3.48	-0.98	-0.94	-0.86	-0.45	0.01	0.02	0.13	0.22	-0.45	0.12	0.18	0.61	-0.905	-0.615	-0.655	-0.345	-0.055	0.035	-1.21313
YDR321W	ASP1	amino acid metabolic process*	hydrolase activity*	0	-3.16	-2.39	-1.9	-2.09	-1.87	-2.14	-2.13	-2.19	-0.065	-3.295	-2.425	-2.095	-2.495	-2.305	-2.235	-2.285	-2.515	0.1	-0.09	-0.48	-1.9	-2.55	-2.88	-3.05	-2.97	-3.12	-1.19	-0.96	-0.75	-0.24	-0.07	0.08	-1.45	-1.06	-1.04	-0.74	-0.51	0.11	-2.17	-1.75	-1.47	-1.16	-0.77	-0.24	-0.172588
YDR324C	UTP4	ribosome biogenesis and assembly*	molecular_function	0	-2.81	-1.98	-1.49	-1.79	-1.64	-2.49	-2.84	-2.29	0.115	-4.435	-2.895	-2.035	-2.205	-2.505	-2.655	-2.585	-2.725	0.415	-0.255	-0.545	-1.675	-1.935	-2.125	-2.065	-2.115	-2.155	-1.24	-1.03	-0.57	-0.53	-0.17	-0.18	-1.34	-1.04	-0.69	-0.49	-0.18	-0.1	-0.73	-0.54	-0.36	-0.33	-0.19	-0.04	0.03
YDR408C	ADE8	translation*	transferase activity*	0	-2.15	-1.96	-1.63	-1.71	-1.54	-1.27	-1.17	-1.37	0.14	-1.67	-1.95	-1.91	-2.62	-2.76	-2.76	-2.67	-2.52	0.29	0.09	-0.73	-1.79	-2.03	-2.07	-2.18	-2.26	-2.35	-0.55	-0.08	-0.73	-0.63	-0.22	-0.06	-1.7	-1.37	-1.21	-1.05	-0.64	-0.35	-2.275	-1.855	-1.405	-1.225	-0.755	-0.755	-1.18669
YDR418W	RPL12B	translation*	RNA binding*	0	-1.05	-1.28	-0.75	-1.2	-1.43	-1.9	-2.97	-3.02	-0.175	-3.505	-3.275	-1.665	-1.805	-2.285	-2.265	-2.205	-2.385	-0.02	0.13	0.09	-3.31	-2.91	-3.09	-2.63	-2.64	-2.71	0.32	0.4	0.3	0.01	0.28	0.3	-0.14	0.48	0.76	0.61	0.34	0.28	0.48	0.61	0.71	0.56	0.7	0.67	-0.269871
YDR418W	RPL12B	translation*	RNA binding*	0	-1.05	-1.28	-0.75	-1.2	-1.43	-1.9	-2.97	-3.02	-0.175	-3.505	-3.275	-1.665	-1.805	-2.285	-2.265	-2.205	-2.385	-0.02	0.13	0.09	-3.31	-2.91	-3.09	-2.63	-2.64	-2.71	0.32	0.4	0.3	0.01	0.28	0.3	-0.14	0.48	0.76	0.61	0.34	0.28	0.48	0.61	0.71	0.56	0.7	0.67	-0.269871
YDR454C	GUK1	transport*	nucleotide binding*	0	-1.66	-1.41	-1.15	-2.28	-2.56	-3.22	-3.66	-3.95	0.03	-1.46	-1.31	-1.99	-2.55	-2.56	-2.51	-2.52	-2.74	0.305	0.225	-0.085	-1.045	-2.625	-2.785	-3.035	-3.325	-2.975	-0.98	-0.39	-0.38	-0.31	0.04	0.17	-1.71	-1.12	-0.26	-0.21	-0.04	0.26	-1.365	-1.005	-0.775	-0.395	-0.465	-0.475	-0.94834
YDR471W	RPL27B	translation	structural constituent of ribosome	0	-1.74	-2.17	-1.56	-1.56	-1.71	-1.92	-2.44	-2.87	-0.165	-4.905	-3.515	-2.205	-1.725	-2.045	-2.175	-2.185	-2.105	0.3	0.09	-0.24	-3.6	-2.98	-2.89	-2.83	-2.81	-2.6	-1.05	-0.38	-0.24	-0.29	0.12	0.13	-2.47	-1.98	-0.78	-0.21	0.01	0.14	-1.415	-1.275	-0.915	-0.725	-0.615	-0.255	-0.23
YDR508C	GNP1	transport*	amino acid transmembrane transporter activity*	0	-3.78	-3.58	-2.79	-0.1	0.52	0.32	-0.05	0.62	-0.875	-3.475	-1.595	-1.865	-3.135	-2.995	-2.935	-2.755	-2.615	-0.555	-0.595	-1.725	-3.775	-4.735	-5.555	-5.335	-5.355	-4.755	0.01	-0.79	-2.16	-2.33	-0.76	0.36	-3.27	-3.09	-3.39	-3.12	-2.56	-1.65	-2.425	-2.125	-1.705	-1.185	-0.785	0.355	-0.66
YEL026W	SNU13	ribosome biogenesis and assembly*	RNA binding*	0	-2.29	-2.3	-1.76	-1.4	-1.11	-1.23	-2.42	-0.79	-0.105	-3.715	-2.375	-2.535	-1.495	-1.615	-1.685	-2.205	-2.515	0.4	0.12	-0.28	-1.5	-2.17	-2.35	-2.42	-3.23	-2.59	-1.61	-1.11	-0.8	-0.47	0.11	0.34	-3.16	-2.34	-0.93	-0.47	-0.12	0.48	-1.62	-1.46	-1.02	-0.42	-0.57	0.17	-0.245671
YEL040W	UTR2	cell wall organization and biogenesis*	molecular_function*	0	-1.36	-1.71	-2.21	-3.71	-4	-4.03	-4.79	-3.37	-0.44	-1.3	-3	-5.14	-5.03	-4.52	-4.47	-4.79	-4.5	-0.6	-0.48	-0.99	-2.97	-5.87	-5.36	-5.46	-5.95	-5.36	-2.02	-1.71	-0.85	-0.46	0.46	0.78	-2.82	-1.7	-1.12	-0.03	0.7	1.31	-3.005	-2.125	-1.415	-0.735	0.035	0.435	-1.23446
YEL042W	GDA1	protein amino acid glycosylation	hydrolase activity*	0	-1.99	-1.55	-1.2	-1.77	-1.36	-1.69	-1.7	-1.91	-0.42	-2.3	-1.62	-2.23	-2.37	-2.09	-2.02	-2.04	-2.16	-0.45	-0.77	-0.81	-1.72	-2.45	-2.61	-2.56	-2.74	-2.62	-1.17	-1.27	-0.76	-0.62	-0.17	0.1	-0.69	-0.84	-1.36	-1.02	-0.68	0.14	-1.415	-1.175	-1.085	-0.915	-0.485	-0.255	-0.856133
YEL054C	RPL12A	translation*	RNA binding*	0	-1.78	-2.03	-1.38	-1.28	-1.59	-2.13	-2.65	-2.96	0.08	-4.72	-3.96	-2.51	-2.46	-2.89	-2.97	-2.91	-2.91	0.17	0.18	-0.02	-3.83	-3.46	-3.46	-3.33	-3.37	-3.44	-0.34	-0.29	-0.23	-0.14	0.03	0.14	-1.16	-0.62	-0.13	0.06	0	0.13	-0.49	-0.26	0.18	0.25	0.53	0.73	-0.188545
YER056C-A	RPL34A	translation	structural constituent of ribosome	0	-1.84	-2.23	-1.73	-2.11	-2.3	-2.93	-3.68	-4.03	0.135	-3.825	-3.875	-2.045	-1.765	-2.035	-2.055	-2.035	-2.105	0.285	0.065	-0.195	-4.015	-3.235	-3.425	-2.985	-2.845	-2.885	-0.76	-0.46	-0.57	-0.76	-0.49	-0.42	-1.11	-1.45	-0.17	-0.57	-0.22	-0.56	-0.565	-0.245	-0.125	-0.175	-0.065	0.185	-0.161397
YER056C-A	RPL34A	translation	structural constituent of ribosome	0	-1.84	-2.23	-1.73	-2.11	-2.3	-2.93	-3.68	-4.03	0.135	-3.825	-3.875	-2.045	-1.765	-2.035	-2.055	-2.035	-2.105	0.285	0.065	-0.195	-4.015	-3.235	-3.425	-2.985	-2.845	-2.885	-0.76	-0.46	-0.57	-0.76	-0.49	-0.42	-1.11	-1.45	-0.17	-0.57	-0.22	-0.56	-0.565	-0.245	-0.125	-0.175	-0.065	0.185	-0.161397
YER074W	RPS24A	translation	nucleotide binding*	0	-1.84	-2.07	-1.23	-1.54	-1.81	-2.18	-3.06	-3.59	0.2	-3.64	-3.65	-1.84	-1.76	-2.37	-2.37	-2.2	-2.38	0.37	0.4	0.24	-3.39	-3.03	-3.07	-2.86	-2.89	-2.75	-0.2	0.07	0.15	-0.08	0.19	0.21	-1.79	-1.2	0.18	0.3	0.42	0.1	0.085	-0.005	0.385	0.385	0.365	0.475	-0.306424
YER091C	MET6	amino acid biosynthetic process*	transferase activity*	0	-0.77	-1.4	-2.17	-2.24	-2.15	-2.66	-3.04	-4.02	0.2	-1.73	-2.72	-2.25	-2.07	-2.04	-2.05	-1.93	-2.03	-0.225	0.015	-0.315	-2.185	-3.065	-2.885	-2.615	-2.625	-3.015	-1.32	-1.21	-0.58	-0.26	-0.25	-0.04	-1.01	-0.32	-1.02	-0.73	-0.54	-0.07	-1.76	-1.12	-0.65	-0.62	-0.15	-0.15	-0.419135
YER131W	RPS26B	translation	structural constituent of ribosome	0	-2.36	-2.84	-1.9	-1.74	-1.73	-2	-2.68	-3.14	-0.065	-4.525	-4.535	-2.155	-1.935	-2.135	-2.365	-2.275	-2.525	0.14	0.11	-0.14	-4.26	-3.49	-3.03	-2.67	-2.08	-2.63	-0.67	-0.55	-0.32	-0.36	-0.12	0.01	-1.56	-0.79	0.25	0.13	0.23	-0.09	-0.475	-0.125	0.305	0.245	0.625	0.605	-0.403327
YFL034C-A	RPL22B	translation	structural constituent of ribosome	0	-0.78	-2.13	-1.45	-0.82	-1.21	-1.28	-1.38	-1.95	-0.365	-3.925	-3.475	-1.775	-1.395	-1.675	-1.995	-2.165	-1.945	-0.01	-0.3	-0.73	-3.81	-2.45	-2.08	-2.28	-2.34	-2.49	-0.78	-0.35	-0.64	-0.66	-0.1	0.05	-2.54	-1.93	-0.68	-0.18	-0.1	-0.15	-1.195	-1.335	-0.975	-0.835	-0.655	-0.255	-0.138526
YFR031C-A	RPL2A	translation	RNA binding*	0	-1.48	-1.68	-1.19	-1.65	-1.92	-2.46	-3.15	-3.61	-0.235	-3.835	-3.865	-1.975	-2.395	-2.895	-2.885	-2.805	-2.965	-0.125	-0.055	-0.225	-3.925	-3.535	-3.715	-3.435	-3.405	-3.425	-0.59	-0.5	-0.49	-0.15	-0.03	-0.01	-0.86	-0.43	-0.76	-0.61	-0.4	0.01	-1.72	-1.21	-0.85	-0.83	-0.31	-0.43	-0.41275
YFR032C-A	RPL29	translation	structural constituent of ribosome	0	-1.37	-1.72	-1.1	-1.01	-1.45	-1.68	-2.62	-2.55	0.075	-3.105	-2.615	-1.235	-1.085	-1.615	-1.675	-1.605	-1.685	0.425	0.485	0.235	-2.995	-3.295	-3.285	-3.385	-3.495	-3.255	-0.43	-0.03	-0.31	-0.33	0.05	-0.11	-1.04	-0.51	0.41	0.4	0.34	0	-0.88	-0.87	-0.35	-0.11	-0.17	0.34	-0.173846
YGL008C	PMA1	transport*	nucleotide binding*	0	-1.68	-0.27	-0.29	-3.27	-3.58	-4	-4.52	-4.06	-0.475	-1.025	-0.875	-1.175	-2.695	-2.785	-2.785	-2.855	-2.305	-0.52	-0.69	-0.36	-0.36	-3.29	-3.7	-3.7	-3.1	-2.98	0.38	0.34	0.13	0.01	-0.27	-0.2	1.68	1.29	0.83	0.61	0.3	0.18	0.165	0.265	0.245	0.175	-0.175	-0.735	-0.921852
YGL009C	LEU1	metabolic process*	metal ion binding*	0	0	-0.85	-1.34	-2.28	-2.47	-2.84	-2.94	-3.03	0.07	-1.42	-2.32	-2.2	-1.91	-1.77	-2.14	-2.22	0.25	0.07	-0.2	-0.4	-1.88	-2.51	-2.78	-2.74	-2.82	-2.82	-1.12	-0.77	-0.67	-0.59	-0.2	0.03	-0.73	-1.17	-1.2	-1.02	-0.5	-0.22	-0.705	-0.475	-0.515	-0.395	-0.055	0.075	-0.708701
YGL031C	RPL24A	translation	RNA binding*	0	-1.69	-2.43	-1.75	-1.66	-1.82	-1.89	-2.31	-2.84	0.065	-3.105	-4.165	-2.245	-2.045	-2.475	-2.555	-2.405	-2.255	0.23	0.12	-0.32	-4.22	-3.4	-3.21	-3.51	-3.4	-2.98	-1.36	-0.69	-0.41	-0.52	-0.1	0.2	-3.24	-2.81	-1.02	-0.31	0.12	0.05	-0.68	-0.46	-0.06	0.38	0.47	0.18	-0.282001
YGL076C	RPL7A	translation	structural constituent of ribosome*	0	-2.32	-2.87	-1.82	-2.31	-2.94	-2.79	-3.95	-3.75	-0.025	-3.235	-3.455	-2.315	-2.515	-2.985	-3.175	-3.145	-3.215	0.34	-0.04	-0.61	-3.58	-3.97	-4.51	-4.28	-4.58	-4.33	-2.12	-1.84	-1.39	-0.86	-0.17	0.01	-3.48	-3.22	-2.07	-1.33	-0.66	0.11	-2.19	-1.94	-1.24	-0.9	-0.4	0.02	-0.150893
YGL076C	RPL7A	translation	structural constituent of ribosome*	0	-2.32	-2.87	-1.82	-2.31	-2.94	-2.79	-3.95	-3.75	-0.025	-3.235	-3.455	-2.315	-2.515	-2.985	-3.175	-3.145	-3.215	0.34	-0.04	-0.61	-3.58	-3.97	-4.51	-4.28	-4.58	-4.33	-2.12	-1.84	-1.39	-0.86	-0.17	0.01	-3.48	-3.22	-2.07	-1.33	-0.66	0.11	-2.19	-1.94	-1.24	-0.9	-0.4	0.02	-0.150893
YGL097W	SRM1	cell cycle*	guanyl-nucleotide exchange factor activity*	0	-1.42	-1.23	-0.84	-2.75	-2.63	-3.47	-3.68	-3.31	-0.04	-1.34	-1.39	-2.24	-2.72	-2.61	-2.37	-2.3	-2.35	0.125	-0.085	-0.055	-0.555	-2.095	-2.615	-2.765	-2.945	-3.345	-0.67	-0.6	-0.38	-0.16	0.11	0.19	-0.05	-0.04	-1.17	-0.65	-0.39	0.01	-1.39	-0.95	-0.76	-0.97	-0.1	-0.23	-1.39795
YGL103W	RPL28	translation*	RNA binding*	0	-1.19	-1.78	-1	-1.31	-1.5	-1.65	-1.97	-2.72	-0.23	-2.66	-3.62	-1.67	-1.81	-2.3	-2.41	-2.2	-2.21	0.03	0.07	0.05	-3.49	-3.19	-3.11	-2.83	-2.13	-2.58	0.1	0.29	-0.02	-0.06	-0.23	-0.01	-0.14	0.38	0.37	0.11	0.06	-0.14	0.735	0.975	1.055	0.965	1.015	0.915	-0.35
YGL120C	PRP43	ribosome biogenesis and assembly*	nucleotide binding*	0	-3.44	-2.7	-1.98	-2.36	-2.2	-3.24	-3.68	-3.07	-0.03	-5.33	-3.18	-2.43	-2.93	-2.97	-2.9	-2.69	-2.54	0.21	-0.47	-0.53	-1.13	-1.17	-1.66	-1.62	-1.79	-2.15	-1.13	-1.13	-0.54	-0.52	-0.11	0	-1.21	-0.83	-1.21	-0.92	-0.49	-0.08	-0.38	-0.18	-0.13	-0.11	0.28	0.39	-0.0113912
YGL189C	RPS26A	translation	structural constituent of ribosome	0	-0.59	-1.13	-0.72	-1.04	-1.4	-1.71	-2.3	-2.97	-0.33	-2.69	-3.61	-1.57	-1.57	-2.08	-2.02	-1.83	-1.82	-0.18	-0.81	-0.13	-3.67	-2.73	-2.87	-2.35	-1.95	-2.17	-0.16	0.1	-0.23	-0.46	-0.24	-0.26	-1.63	-1.25	-0.08	0.09	0.07	-0.44	0.705	0.735	0.945	0.855	0.765	0.935	-0.05
YGL225W	VRG4	transport*	sugar:hydrogen ion symporter activity*	0	-2.34	-1.79	-1.68	-2.96	-3.05	-3.49	-3.71	-3.71	-0.325	-0.835	-1.155	-2.125	-2.665	-2.655	-2.495	-2.365	-2.475	-0.455	-0.445	-0.195	-1.265	-2.735	-2.675	-2.615	-2.675	-2.495	-1.51	-1.22	-1.21	-0.73	-0.31	-0.21	-0.58	-0.01	-0.3	0.17	0.09	0.18	-0.73	-0.31	0.07	0.56	0.67	0.78	-0.747857
YGR055W	MUP1	transport*	amino acid transmembrane transporter activity*	0	-0.05	-1.08	-3.47	0.32	-0.34	-1.11	-1.74	-1.59	-0.745	-2.175	-1.805	-1.155	-2.575	-2.765	-2.445	-2.075	-0.005	-0.935	-0.925	-2.915	-4.485	-5.365	-5.885	-5.735	-6.065	-5.825	0.03	-0.08	-0.46	-0.1	-0.24	-0.33	-1.26	-0.75	-0.85	-0.87	-0.73	-0.31	-3.195	-2.255	-1.635	-1.195	-0.835	-0.615	0.146072
YGR085C	RPL11B	translation*	RNA binding*	0	-2.06	-2.42	-1.61	-2.41	-3.15	-3.67	-3.83	-4.2	0.02	-4.18	-3.49	-2.58	-3.07	-3.7	-3.84	-3.71	-3.72	0.325	0.135	-0.375	-3.855	-4.235	-4.235	-4.415	-4.385	-4.645	-1.23	-0.84	-0.63	-0.66	-0.28	-0.14	-3.26	-2.97	-0.94	-0.47	-0.16	-0.22	-1.94	-1.76	-1.1	-0.8	-0.58	-0.37	-0.250489
YGR094W	VAS1	translation*	nucleotide binding*	0	-1.23	-1.02	-1.03	-2.04	-2.02	-2.66	-2.88	-3.22	0.06	-1.75	-2.12	-2.02	-2.61	-2.64	-2.67	-2.59	-2.65	0.115	0.055	-0.115	-1.065	-1.755	-2.255	-2.275	-2.315	-2.405	-0.41	-0.45	-0.38	-0.38	-0.21	-0.18	-0.71	-0.87	-0.8	-0.76	-0.29	-0.28	-0.335	-0.355	-0.395	-0.515	-0.295	-0.125	-0.207807
YGR123C	PPT1	ribosome biogenesis and assembly*	hydrolase activity*	0	-2.82	-2.21	-1.69	-2.11	-1.75	-2.19	-2.3	-1.82	0.09	-4.77	-3.25	-2.71	-2.88	-2.83	-2.73	-2.69	-2.73	0.38	-0.1	-0.62	-1.92	-2.39	-2.73	-2.89	-2.71	-3.15	-1.34	-0.62	-0.42	-0.33	0.09	0.33	-1.58	-1.43	-1.02	-0.71	-0.04	0.24	-1.265	-0.915	-0.675	-0.625	-0.205	0.155	-0.0970382
YGR128C	UTP8	ribosome biogenesis and assembly*	snoRNA binding	0	-3.18	-2.42	-1.72	-1.73	-1.5	-2.25	-2.58	-2.17	0.09	-5.38	-3.28	-2.31	-2.71	-2.96	-3.03	-2.91	-3	0.39	-0.32	-0.5	-1.52	-1.82	-2.12	-1.93	-2.08	-2.06	-0.91	-0.86	-0.45	-0.46	-0.19	-0.07	-1.28	-1.13	-0.57	-0.72	-0.23	0.13	-0.265	-0.075	-0.095	0.065	0.165	0.455	0.02
YGR148C	RPL24B	translation	RNA binding*	0	-1.51	-1.86	-1.21	-1.43	-1.57	-1.85	-2.35	-2.08	-0.235	-2.935	-2.455	-1.705	-1.385	-1.535	-1.475	-1.595	-1.495	0.24	0.14	-0.24	-3.06	-2.89	-2.78	-2.73	-3.01	-2.7	-0.9	-0.18	-0.18	-0.27	-0.11	0.22	-2.26	-2.31	-0.79	-0.22	0.04	0.12	-1.5	-1.43	-0.96	-0.62	-0.47	-0.7	-0.26
YGR151C	YGR151C	biological_process	molecular_function	0	-1.76	-1.67	-1.55	-3.71	-3.04	-4.22	-4.24	-3.63	0.085	-0.355	-0.935	-2.355	-3.155	-2.755	-2.485	-2.525	-2.495	0.1	-0.05	-0.07	-1.45	-4	-4.17	-4.19	-4.06	-3.81	-0.76	-0.62	-0.73	-0.72	-0.21	0.03	-0.62	-0.3	0.04	0.63	0.53	0.23	0.245	0.345	0.445	0.475	0.645	0.975	-1.22075
YGR151C	YGR151C	biological_process	molecular_function	0	-1.76	-1.67	-1.55	-3.71	-3.04	-4.22	-4.24	-3.63	0.085	-0.355	-0.935	-2.355	-3.155	-2.755	-2.485	-2.525	-2.495	0.1	-0.05	-0.07	-1.45	-4	-4.17	-4.19	-4.06	-3.81	-0.76	-0.62	-0.73	-0.72	-0.21	0.03	-0.62	-0.3	0.04	0.63	0.53	0.23	0.245	0.345	0.445	0.475	0.645	0.975	-1.22075
YGR159C	NSR1	telomere maintenance*	nucleotide binding*	0	-3.95	-2.81	-1.93	-1.45	-1.26	-2.41	-2.78	-2.06	0.12	-4.6	-3.89	-2.48	-3.24	-3.43	-3.46	-3.5	-3.46	0.275	-0.765	-0.715	-1.495	-1.165	-1.745	-1.825	-1.885	-2.205	-0.46	-0.61	-0.26	-0.3	0.02	0.2	-1.17	-1	-1.72	-1.23	-1.11	-0.27	-1.115	-0.925	-0.905	-1.115	-0.595	-0.405	0.0676575
YGR191W	HIP1	transport*	amino acid transmembrane transporter activity*	0	-1.56	-1.36	-1.42	-2.02	-1.88	-2.47	-2.7	-2.15	-0.49	-2.64	-2.75	-2.99	-3.75	-3.49	-3.3	-3.31	-2.95	-0.335	-0.675	-0.975	-1.325	-1.245	-1.715	-2.095	-2.235	-2.405	-0.32	-0.21	-0.38	-0.23	-0.05	-0.1	-1.94	-1.44	-1.46	-1.37	-0.92	-0.37	-1.03	-0.93	-1.07	-0.64	-0.7	-0.42	-0.766011
YGR208W	SER2	metabolic process*	hydrolase activity*	0	-2.43	-2.27	-2.07	-3.21	-3.51	-4.2	-4.44	-4.68	0.16	-1.25	-1.79	-2.42	-2.96	-2.78	-2.76	-2.77	-2.96	0.32	0.14	-0.22	-1.42	-2.83	-2.83	-2.9	-3.06	-3.01	-0.96	-0.64	-0.85	-0.89	-0.37	0.13	-1.96	-1.22	0.06	0.16	0.43	0.1	-1.38	-1.2	-1	-0.99	-0.43	-0.2	-0.753869
YGR264C	MES1	translation*	nucleotide binding*	0	-1.98	-2.04	-1.68	-2.67	-2.74	-3.37	-3.52	-3.54	0.195	-2.075	-2.155	-1.785	-2.305	-2.435	-2.505	-2.475	-2.335	0.315	0.055	-0.265	-1.515	-2.115	-2.445	-2.525	-2.445	-2.575	-0.77	-0.58	-0.48	-0.52	-0.22	-0.03	-0.83	-0.7	-0.05	-0.24	-0.04	0.1	-0.565	-0.215	-0.075	-0.065	0.275	0.265	-0.16
YHL001W	RPL14B	translation	RNA binding*	0	-1.9	-2.32	-1.52	-1.8	-2.17	-2.14	-3.11	-2.87	-0.135	-3.445	-3.295	-2.075	-2.375	-3.065	-3.075	-3.145	-3.445	0.1	-0.19	-0.68	-3.32	-3.77	-3.89	-3.61	-3.84	-3.89	-1.2	-0.78	-0.53	-0.2	0.12	0.23	-2.44	-1.88	-0.75	-0.23	0.03	0.25	-1.64	-1.52	-0.7	-0.43	-0.15	0.28	-0.23
YHL015W	RPS20	translation	structural constituent of ribosome	0	-1.54	-2.12	-1.45	-1.73	-2.07	-2.66	-3.03	-3.86	-0.025	-2.135	-3.755	-2.345	-2.635	-3.315	-3.395	-3.245	-3.125	0.14	0.06	-0.11	-4.02	-3.88	-3.99	-4.02	-4.16	-4.1	-0.68	-0.42	-0.25	-0.24	-0.14	-0.09	-2.11	-1.71	-0.71	-0.39	-0.13	-0.11	-1.46	-1.17	-0.62	-0.33	-0.21	-0.24	-0.46
YHL033C	RPL8A	translation*	structural constituent of ribosome	0	-1.51	-1.99	-1.24	-1.83	-1.83	-2.24	-2.42	-2.66	0.17	-3.79	-3.81	-1.99	-2.26	-3.08	-3.21	-3.15	-3.15	0.24	-0.03	-0.22	-4.57	-4.73	-4.47	-4.34	-4.25	-4.36	-1.1	-0.89	-0.42	-0.4	-0.12	-0.03	-1.28	-1.02	-1.01	-0.53	-0.56	-0.13	-1.585	-0.975	-0.505	-0.555	0.065	0.015	-0.274354
YHR010W	RPL27A	translation	structural constituent of ribosome	0	-1.93	-2.16	-1.61	-1.88	-2.08	-2.46	-2.79	-2.93	-0.04	-4.37	-4.05	-3.2	-3.04	-3.25	-3.17	-3	-2.85	0.35	0.18	-0.1	-3.88	-4.11	-3.96	-4.15	-4.29	-4.06	-0.77	-0.3	-0.08	-0.26	-0.01	-0.09	-2.77	-2.18	-0.41	0.19	0.28	-0.24	-0.635	-0.495	-0.095	0.145	0.175	0.135	-0.36
YHR025W	THR1	amino acid biosynthetic process*	nucleotide binding*	0	-1.35	-1.18	-0.68	-1.67	-1.82	-2.34	-2.62	-2.44	0.015	-1.385	-1.405	-1.645	-2.055	-1.905	-1.905	-2.015	-1.985	0.05	-0.15	-0.44	-1.29	-2.07	-2.29	-2.52	-2.82	-2.58	-0.91	-0.78	-0.32	0.01	-0.16	-0.36	-1.21	-0.76	-1.6	-0.89	-0.9	0.11	-2.86	-2.46	-2.34	-1.61	-1.12	-1.05	-0.220187
YHR049W	FSH1	biological_process	hydrolase activity*	0	-2.74	-3.23	-3.59	-3.66	-3.47	-4.31	-4.56	-4.25	-0.08	-1.6	-2.79	-3.38	-3.5	-4.23	-4.44	-4.38	-3.74	0	0.15	0.07	-2.04	-3.21	-3.76	-3.73	-3.96	-4.11	-1.73	-1.17	-1.05	-0.66	-0.14	-0.03	-1.82	-1.04	-0.66	-0.21	0.09	0.52	-1.05	-0.8	-0.71	-0.27	-0.08	0.14	-0.780186
YHR052W	CIC1	ribosome biogenesis and assembly*	protein binding, bridging	0	-2.88	-2.06	-1.77	-2.01	-2	-2.53	-2.41	-1.58	-0.01	-6.08	-3.38	-2.11	-2.81	-2.86	-3.12	-3.2	-3.28	0.22	-0.47	-0.64	-1.49	-1.97	-2.39	-2.38	-2.22	-2.29	-0.68	-0.45	-0.47	-0.61	-0.18	0.1	-1.49	-0.64	0.04	0.24	0.08	-0.09	-1.005	-0.805	-0.685	-0.765	-0.405	-0.265	-0.07
YHR068W	DYS1	hypusine biosynthetic process from peptidyl-lysine*	transferase activity*	0	-2.21	-2.06	-2.07	-3.06	-3.21	-3.77	-3.73	-3.42	-0.07	-2.64	-3.13	-3.17	-3.4	-3.17	-3.02	-2.92	-2.73	0.175	0.035	-0.155	-1.395	-2.495	-3.355	-3.555	-3.845	-3.685	-1.67	-1.39	-0.81	-0.64	-0.23	0.18	-2.48	-2.14	-1.41	-1	-0.55	-0.01	-0.985	-0.865	-0.775	-0.525	0.165	0.345	-0.62555
YHR089C	GAR1	ribosome biogenesis and assembly*	RNA binding*	0	-2.34	-2.21	-1.82	-2.38	-2.24	-2.98	-3.3	-2.91	-0.11	-4.26	-3.14	-2.93	-3.34	-3.53	-3.5	-3.53	-3.56	0.265	0.005	-0.435	-1.685	-2.395	-2.735	-3.005	-3.255	-3.275	-1.13	-0.87	-0.43	-0.28	0.06	0.28	-1.77	-1.67	-1.33	-0.57	-0.16	0.24	-1.475	-1.145	-0.825	-0.575	-0.065	0.025	-0.474169
YHR128W	FUR1	nucleoside metabolic process*	transferase activity*	0	-2.32	-1.86	-2	-2.23	-2.02	-2.55	-2.9	-2.96	-0.035	-3.525	-2.385	-2.475	-3.545	-3.475	-3.445	-3.435	-3.595	0.145	-0.185	-0.525	-1.105	-2.655	-3.115	-3.015	-3.405	-3.505	-1.5	-1.28	-0.88	-0.42	0.04	0.54	-1.77	-1.21	-0.53	-0.34	-0.05	0.71	-2.075	-1.615	-1.435	-1.085	-0.855	-0.485	-0.394117
YHR133C	NSG1	sterol biosynthetic process	protein binding	0	-1.62	-1.69	-1.53	-2.29	-2.21	-2.41	-2.41	-2.42	-0.415	-1.315	-1.525	-1.745	-2.165	-2.025	-1.935	-1.855	-1.855	-0.495	-0.705	-0.885	-1.765	-2.855	-2.985	-2.915	-3.015	-2.905	-1.1	-0.88	-0.67	-0.33	-0.23	-0.02	-1.48	-1.08	-0.79	-0.32	-0.32	0.21	-2.195	-1.805	-1.425	-1.115	-0.815	-0.695	-0.3
YHR149C	SKG6	biological_process	molecular_function	0	-1.72	-1.01	-0.9	-2.33	-2.45	-3.18	-3.36	-3.84	-0.2	-0.82	-0.77	-1.73	-2.71	-2.75	-2.72	-2.67	-2.39	-0.285	-0.375	-0.415	-0.935	-2.875	-2.875	-2.815	-2.835	-2.975	-0.94	-0.75	-0.59	-0.45	-0.1	-0.05	0.34	0.36	-0.13	-0.13	0.1	0.17	-0.44	-0.14	-0.1	0.03	0.2	0.12	-0.625051
YHR197W	RIX1	ribosome biogenesis and assembly*	molecular_function	0	-3.61	-2.57	-1.74	-1.94	-1.81	-2.92	-3.25	-3.07	-0.085	-4.665	-3.385	-2.305	-2.505	-2.445	-2.385	-2.285	-2.305	0.14	-0.64	-0.93	-1.67	-2.02	-2.28	-2.31	-2.09	-2.11	-0.69	-0.38	-0.25	-0.29	-0.04	0.23	-1.01	-0.66	-0.49	-0.5	-0.23	0.12	-0.75	-0.38	-0.43	-0.2	-0.09	0.05	0.13
YHR208W	BAT1	metabolic process*	transferase activity*	0	-0.69	-1.43	-1.29	-2.38	-2.45	-3.09	-3.19	-3.02	0.005	-2.205	-2.845	-2.405	-1.565	-1.355	-1.735	-1.835	0.045	-0.01	-0.1	-0.2	-1.86	-2.07	-2.06	-2.22	-2.43	-2.58	-0.52	-0.61	-0.31	-0.18	0.21	0.48	-1.06	-0.72	-1.71	-0.86	-0.54	0.46	-2.435	-2.035	-1.715	-1.415	-0.665	-0.555	-0.606029
YIL052C	RPL34B	translation*	structural constituent of ribosome	0	-2.27	-2.58	-1.92	-2.11	-2.38	-2.81	-3.01	-3.16	-0.12	-4.25	-3.79	-2.62	-2.47	-2.66	-2.72	-2.6	-2.45	0.295	0.255	-0.185	-3.635	-3.225	-3.105	-3.265	-3.365	-2.945	-0.69	-0.34	-0.24	-0.36	-0.02	0.05	-2.07	-1.81	-0.33	-0.26	0.36	0.11	-0.64	-0.6	-0.19	-0.04	-0.06	0.32	-0.33
YIL074C	SER33	metabolic process*	oxidoreductase activity*	0	-0.25	-0.75	-2.16	-1.43	-1.76	-2.55	-2.99	-3.71	-0.005	-0.855	-1.765	-2.065	-1.885	-1.855	-1.815	-1.685	-1.035	-0.03	0.1	-0.53	-1.4	-2.3	-2.35	-2.31	-2.71	-2.74	-1.11	-0.99	-0.85	-0.65	-0.14	0.1	-1.24	-1.14	-0.85	-0.52	-0.43	0.26	-1.22	-1.22	-1.29	-1.29	-0.83	-0.49	-0.501317
YIL110W	YIL110W	response to drug	S-adenosylmethionine-dependent methyltransferase activity	0	-1.96	-1.8	-1.62	-1.81	-1.7	-2.07	-2.21	-2.32	-0.19	-2.05	-1.87	-1.86	-2.14	-2.22	-2.14	-2.23	-2.26	0.03	-0.37	-0.73	-1.37	-1.97	-2.13	-2.34	-2.53	-2.28	-0.74	-0.67	-0.63	-0.57	-0.23	-0.05	-1.65	-1.06	-0.25	0.12	0.12	0.04	-0.965	-0.955	-0.685	-0.555	-0.365	-0.195	-0.19
YIL133C	RPL16A	translation	RNA binding*	0	-1.57	-1.87	-1.07	-1.44	-1.76	-1.94	-2.69	-3.26	-0.33	-4.86	-4.04	-1.84	-2.13	-2.64	-2.56	-2.47	-2.72	-0.145	-0.335	-0.335	-4.135	-3.385	-3.685	-3.285	-3.115	-3.075	-0.24	0.06	-0.1	-0.28	-0.04	0.12	-1.37	-0.85	0.1	0.05	-0.06	0.03	-0.145	-0.195	-0.025	0.075	0.085	0.315	-0.17
YIL145C	PAN6	pantothenate biosynthetic process	ligase activity*	0	-0.8	-1.02	-1.13	-2	-2.24	-2.64	-3.25	-2.44	-0.145	-1.225	-1.105	-2.085	-1.905	-2.105	-1.955	-2.285	-2.235	0.05	-0.17	-0.09	-0.4	-2.39	-2.89	-2.9	-3.16	-3.11	-0.19	0.19	-0.3	-0.25	0.01	0.28	-0.92	-0.42	-0.51	-0.46	-0.21	0.22	-1.095	-0.685	-0.675	-0.465	-0.225	-0.235	-0.44
YIR012W	SQT1	ribosome biogenesis and assembly*	molecular_function	0	-2.12	-1.83	-1.36	-2.21	-2.16	-2.81	-3.15	-2.94	0.095	-2.915	-1.985	-1.785	-2.385	-2.445	-2.335	-2.315	-2.385	0.14	-0.21	-0.49	-1.01	-1.54	-1.97	-1.99	-1.99	-2.37	-0.43	-0.3	-0.1	-0.01	0.01	0.2	-0.61	-0.44	-0.76	-0.59	-0.34	0.15	-0.845	-0.685	-0.545	-0.665	-0.065	0.065	-0.3
YIR026C	YVH1	ribosome biogenesis and assembly*	hydrolase activity*	0	-2.77	-1.99	-1.26	-1.87	-1.77	-2.46	-2.81	-2.26	-0.175	-3.965	-2.735	-1.825	-2.255	-2.035	-2.125	-2.155	-2.135	0.105	-0.675	-1.015	-1.695	-2.225	-2.605	-2.565	-2.545	-2.605	-0.23	-0.18	-0.26	-0.38	-0.05	0.26	-1.22	-1.14	-1.19	-0.8	-0.46	0.01	-1.11	-0.89	-0.75	-0.73	-0.28	-0.14	-0.05
YIR030C	DCG1	nitrogen compound metabolic process	molecular_function	0	-1.95	-2.11	-1.56	-3.66	-3.88	-4.52	-5.07	-4.49	0.62	0.35	-0.11	-0.26	-1.06	-1.15	-1.12	-1.23	-0.85	0.035	0.015	-0.435	-2.155	-3.595	-3.565	-3.665	-3.585	-3.685	-1.29	-0.73	-0.82	-0.81	-0.18	0.04	0.91	1.24	2.59	2.65	2.79	2.67	-2.625	-2.415	-2.375	-2.045	-1.745	-1.395	-0.30241
YJL136C	RPS21B	translation	structural constituent of ribosome	0	-2.28	-2.78	-2.09	-2.18	-2.19	-2.04	-2.49	-2.78	-0.14	-4.17	-3.7	-2.69	-2.29	-2.47	-2.47	-2.57	-2.54	0.295	-0.005	-0.475	-3.685	-3.405	-3.255	-3.155	-2.965	-2.925	-1.29	-0.6	-0.66	-0.6	-0.19	-0.08	-2.33	-1.56	-0.4	-0.24	0.16	0.11	-1.8	-1.59	-0.92	-0.54	-0.56	-0.3	-0.526266
YJL136C	RPS21B	translation	structural constituent of ribosome	0	-2.28	-2.78	-2.09	-2.18	-2.19	-2.04	-2.49	-2.78	-0.14	-4.17	-3.7	-2.69	-2.29	-2.47	-2.47	-2.57	-2.54	0.295	-0.005	-0.475	-3.685	-3.405	-3.255	-3.155	-2.965	-2.925	-1.29	-0.6	-0.66	-0.6	-0.19	-0.08	-2.33	-1.56	-0.4	-0.24	0.16	0.11	-1.8	-1.59	-0.92	-0.54	-0.56	-0.3	-0.526266
YJL145W	SFH5	phospholipid transport	phosphatidylinositol transporter activity	0	-1.17	-1.07	-0.89	-1.66	-2.12	-2.38	-2.27	-2.28	-0.015	-1.155	-1.055	-1.325	-1.855	-1.705	-1.805	-1.765	-2.125	0.055	-0.215	-0.425	-0.995	-2.985	-3.645	-3.565	-3.295	-3.455	-0.58	-0.46	-0.17	-0.33	-0.36	-0.29	-0.77	-0.32	0.25	0.23	0.13	-0.16	-0.935	-0.855	-0.795	-0.985	-0.755	-0.585	-0.252236
YJL148W	RPA34	ribosome biogenesis and assembly*	DNA-directed RNA polymerase activity	0	-2.69	-2	-1.37	-1.59	-1.59	-2.15	-2.43	-1.81	-0.145	-5.025	-2.925	-2.185	-2.375	-2.415	-2.555	-2.435	-2.475	0.12	-0.24	-0.55	-1.68	-2.38	-2.61	-2.74	-2.93	-2.96	-1.12	-0.7	-0.47	-0.49	-0.22	0.08	-1.99	-1.64	-0.43	0.07	0.04	0.09	-0.58	-0.39	-0.27	-0.18	0.05	-0.02	-0.170858
YJL177W	RPL17B	translation	structural constituent of ribosome	0	-2.06	-2.15	-1.69	-1.77	-2	-2.48	-2.95	-3.31	0.05	-3.65	-3.64	-2.15	-2.31	-2.56	-2.52	-2.52	-2.55	0.085	-0.105	-0.405	-3.795	-3.425	-3.245	-3.165	-3.525	-2.985	-0.53	-0.23	-0.34	-0.37	-0.26	-0.2	-0.71	-0.66	0.05	-0.24	-0.15	-0.07	-1.67	-1.25	-1.19	-0.94	-0.81	-0.78	-0.213999
YJL177W	RPL17B	translation	structural constituent of ribosome	0	-2.06	-2.15	-1.69	-1.77	-2	-2.48	-2.95	-3.31	0.05	-3.65	-3.64	-2.15	-2.31	-2.56	-2.52	-2.52	-2.55	0.085	-0.105	-0.405	-3.795	-3.425	-3.245	-3.165	-3.525	-2.985	-0.53	-0.23	-0.34	-0.37	-0.26	-0.2	-0.71	-0.66	0.05	-0.24	-0.15	-0.07	-1.67	-1.25	-1.19	-0.94	-0.81	-0.78	-0.213999
YJL177W	RPL17B	translation	structural constituent of ribosome	0	-2.06	-2.15	-1.69	-1.77	-2	-2.48	-2.95	-3.31	0.05	-3.65	-3.64	-2.15	-2.31	-2.56	-2.52	-2.52	-2.55	0.085	-0.105	-0.405	-3.795	-3.425	-3.245	-3.165	-3.525	-2.985	-0.53	-0.23	-0.34	-0.37	-0.26	-0.2	-0.71	-0.66	0.05	-0.24	-0.15	-0.07	-1.67	-1.25	-1.19	-0.94	-0.81	-0.78	-0.213999
YJL177W	RPL17B	translation	structural constituent of ribosome	0	-2.06	-2.15	-1.69	-1.77	-2	-2.48	-2.95	-3.31	0.05	-3.65	-3.64	-2.15	-2.31	-2.56	-2.52	-2.52	-2.55	0.085	-0.105	-0.405	-3.795	-3.425	-3.245	-3.165	-3.525	-2.985	-0.53	-0.23	-0.34	-0.37	-0.26	-0.2	-0.71	-0.66	0.05	-0.24	-0.15	-0.07	-1.67	-1.25	-1.19	-0.94	-0.81	-0.78	-0.213999
YJL189W	RPL39	translation	structural constituent of ribosome	0	-2	-2.32	-1.76	-1.93	-2.37	-2.94	-3.17	-3.62	-0.17	-3.94	-3.53	-2.45	-2.21	-2.82	-2.91	-2.93	-3.05	0.39	0.34	-0.04	-2.86	-3.07	-3.1	-3.35	-3.19	-3.2	-0.51	-0.07	-0.24	-0.36	-0.17	-0.16	-1.7	-1.07	0.25	0.07	0.17	-0.06	-0.015	0.005	0.275	0.465	0.325	0.605	-0.375684
YJL190C	RPS22A	translation*	structural constituent of ribosome	0	-2.43	-2.67	-2.03	-2.77	-3.06	-3.96	-4.42	-4.63	0.045	-4.435	-4.645	-3.315	-3.425	-3.915	-4.065	-4.025	-4.025	0.225	0.235	0.115	-4.355	-4.565	-4.575	-4.555	-4.605	-4.475	-0.5	-0.22	-0.2	-0.09	0.01	0.24	-1.34	-0.81	0.31	0.3	0.25	0.44	-1.03	-0.89	-0.5	-0.25	-0.2	0.06	-0.415826
YJL193W	YJL193W	biological_process*	molecular_function*	0	-1.8	-1.87	-1.84	-2.78	-2.81	-3.34	-3.62	-3.91	-0.465	-1.725	-1.915	-2.185	-2.805	-3.165	-2.885	-2.835	-2.405	-0.455	-0.845	-0.925	-1.865	-1.725	-1.545	-1.365	-1.555	-1.505	-1.38	-1.3	-0.95	-0.56	-0.4	-0.21	-1.77	-1.26	-0.72	-0.38	-0.2	0.1	-2.25	-1.9	-1.61	-1.24	-1.18	-0.71	-0.430096
YJL200C	ACO2	biological_process*	metal ion binding*	0	-2.8	-2.42	-1.51	-3.18	-2.74	-3.99	-4.08	-3.67	0.1	-1.26	-2.41	-1.36	-1.72	-1.06	-1.17	-1.28	-1.03	0.135	-0.145	-0.135	-1.515	-2.225	-2.695	-2.825	-2.875	-3.355	-0.14	-0.27	-0.64	-0.6	-0.23	-0.1	-0.63	-0.8	-0.7	-0.4	-0.01	-0.12	0.09	0.2	0.36	0.28	0.69	0.69	-0.0160896
YJL208C	NUC1	ribosome biogenesis and assembly*	hydrolase activity*	0	-2.3	-0.96	-0.59	-2.35	-2.38	-3.33	-3.65	-3.46	-0.19	-3.59	-2.65	-2.56	-2.96	-2.77	-2.73	-2.58	-2.74	0.12	-0.23	-0.45	-1.53	-2.27	-2.3	-2.27	-2.32	-2.46	-0.51	-0.38	-0.47	-0.22	0.13	0.18	-1.5	-1.32	-1.06	-0.68	-0.55	-0.41	0.04	0.13	0.24	0.26	0.55	0.76	-1.23371
YJR069C	HAM1	DNA repair*	hydrolase activity*	0	-1.72	-1.62	-1.55	-3.17	-3.34	-4.07	-4.41	-4.27	0.055	-1.025	-1.155	-2.155	-2.585	-2.305	-2.365	-2.285	-2.625	0.3	0	0.01	-1	-2.52	-2.42	-2.54	-2.54	-2.53	-0.34	-0.24	-0.15	-0.12	0.02	0.36	-1.16	-1.01	-0.3	0.12	0.24	0.2	-0.475	-0.315	-0.375	-0.305	-0.145	0.035	-1.26301
YJR070C	LIA1	ribosome biogenesis and assembly*	metal ion binding*	0	-3.07	-2.29	-1.7	-2.01	-1.65	-2.66	-2.79	-2.6	-0.045	-4.745	-2.995	-2.365	-2.765	-2.615	-2.695	-2.595	-2.925	0.03	-0.57	-0.64	-1.46	-2.45	-3.06	-3.07	-3.17	-3.24	-0.74	-0.83	-0.38	-0.2	0.15	0.29	-0.92	-0.67	-1.66	-1.3	-0.82	-0.01	-2.14	-1.7	-1.64	-1.48	-0.9	-0.92	-0.268818
YJR094W-A	RPL43B	translation	metal ion binding*	0	-1.63	-2.1	-1.41	-1.11	-0.95	-0.76	-1.13	-1.29	-0.76	-4.62	-3.39	-2.88	-2.21	-2.34	-2.2	-2.37	-2.05	-0.26	-0.4	-0.77	-3.34	-3.09	-2.66	-2.39	-2.05	-2.01	-0.75	-0.22	-0.2	-0.24	0.12	0.17	-2.06	-1.62	-0.69	-0.09	-0.01	0.04	-2.315	-2.035	-1.495	-1.035	-1.065	-0.615	-0.664924
YJR145C	RPS4A	translation*	RNA binding*	0	-1.7	-1.98	-1.38	-1.59	-1.78	-2.19	-2.53	-3.03	0.195	-2.885	-3.545	-1.875	-2.075	-2.335	-2.425	-2.385	-2.335	0.05	-0.01	-0.43	-3.95	-3.68	-4.08	-4.07	-4.14	-3.88	-0.9	-0.59	-0.31	-0.31	-0.06	0.13	-2.06	-1.86	-1.15	-0.63	-0.28	0.08	-2.11	-1.68	-1.43	-1.23	-0.76	-1.03	-0.358586
YJR147W	HMS2	regulation of transcription, DNA-dependent*	molecular_function*	0	-1.39	-1.94	-2.02	-1.86	-2.13	-2.23	-2.36	-2.4	-0.28	-1.24	-1.55	-2.03	-2.48	-2.7	-2.85	-2.77	-2.56	0.025	-0.175	-0.475	-1.645	-1.815	-2.255	-2.295	-2.675	-2.925	-0.95	-0.93	0.24	0.09	-0.27	-0.45	-0.96	-0.63	-1.15	-0.91	-0.99	0.03	-2.68	-2.24	-2.24	-1.75	-1.49	-1.37	-0.660321
YKL001C	MET14	response to drug*	nucleotide binding*	0	0.22	-0.37	-2	-1.88	-2.47	-3.22	-3.97	-3.58	-0.12	-1.26	-1.96	-2.73	-1.99	-1.58	-1.39	-0.93	0.54	0.035	0.415	-0.095	-2.005	-4.355	-4.165	-4.085	-3.975	-3.525	-0.16	0.22	0.1	0.11	0.33	0.49	-0.72	-0.11	0.66	0.54	0.48	0.15	-1.385	-1.225	-0.915	-0.695	-0.485	0.005	-0.851021
YKL006W	RPL14A	translation	RNA binding*	0	-1.57	-1.83	-1.18	-1.42	-1.45	-1.87	-3.38	-2.6	0.1	-2.86	-2.77	-1.7	-1.54	-2.2	-2.05	-2.27	-2.55	0.1	-0.08	-0.47	-3.38	-3.51	-3.72	-3.29	-3.58	-3.32	-1.08	-0.63	-0.39	-0.19	0.17	0.2	-2.4	-2.03	-0.74	-0.25	0.05	0.23	-1.305	-1.105	-0.185	0.115	0.245	0.675	-0.327643
YKL006W	RPL14A	translation	RNA binding*	0	-1.57	-1.83	-1.18	-1.42	-1.45	-1.87	-3.38	-2.6	0.1	-2.86	-2.77	-1.7	-1.54	-2.2	-2.05	-2.27	-2.55	0.1	-0.08	-0.47	-3.38	-3.51	-3.72	-3.29	-3.58	-3.32	-1.08	-0.63	-0.39	-0.19	0.17	0.2	-2.4	-2.03	-0.74	-0.25	0.05	0.23	-1.305	-1.105	-0.185	0.115	0.245	0.675	-0.327643
YKL006W	RPL14A	translation	RNA binding*	0	-1.57	-1.83	-1.18	-1.42	-1.45	-1.87	-3.38	-2.6	0.1	-2.86	-2.77	-1.7	-1.54	-2.2	-2.05	-2.27	-2.55	0.1	-0.08	-0.47	-3.38	-3.51	-3.72	-3.29	-3.58	-3.32	-1.08	-0.63	-0.39	-0.19	0.17	0.2	-2.4	-2.03	-0.74	-0.25	0.05	0.23	-1.305	-1.105	-0.185	0.115	0.245	0.675	-0.327643
YKL009W	MRT4	telomere maintenance*	molecular_function	0	-3.64	-2.99	-2.27	-2.38	-2.58	-3	-3.1	-2.85	-0.135	-6.135	-3.985	-2.705	-2.305	-2.435	-2.775	-2.835	-2.835	0.24	-0.48	-0.69	-1.69	-2.2	-2.17	-2.5	-2.49	-2.75	-0.96	-0.87	-0.91	-0.83	-0.41	0.05	-1.88	-1.49	-0.69	-0.16	-0.2	-0.07	-1.58	-1.3	-1.17	-1.01	-0.81	-0.6	0.03
YKL027W	YKL027W	biological_process	molecular_function*	0	-0.94	-1.23	-0.79	-2.2	-2.92	-3.5	-3.62	-3.2	-0.085	-1.435	-1.815	-1.885	-1.965	-1.885	-1.895	-1.855	-1.925	0	-0.08	-0.56	-1.69	-2.69	-2.62	-2.78	-2.65	-2.8	-0.52	-0.35	0.08	-0.04	-0.1	0.17	-0.49	-0.39	-0.74	-0.25	-0.23	0.05	-1.32	-1.06	-0.93	-1.09	-0.54	-0.67	-0.536728
YKL081W	TEF4	translation*	translation elongation factor activity	0	-1.33	-1.17	-1.17	-1.66	-1.64	-2.55	-3.29	-3.59	-0.015	-2.555	-2.605	-2.465	-3.305	-3.795	-3.855	-3.775	-3.785	0.12	0.09	0.22	-0.54	-0.7	-1.09	-0.92	-1	-1.91	-1.39	-1.56	-1	-0.63	-0.28	-0.11	-1.12	-0.94	-1.98	-1.68	-1.16	-0.25	0.135	0.405	0.335	0.375	0.685	0.745	-0.783331
YKL081W	TEF4	translation*	translation elongation factor activity	0	-1.33	-1.17	-1.17	-1.66	-1.64	-2.55	-3.29	-3.59	-0.015	-2.555	-2.605	-2.465	-3.305	-3.795	-3.855	-3.775	-3.785	0.12	0.09	0.22	-0.54	-0.7	-1.09	-0.92	-1	-1.91	-1.39	-1.56	-1	-0.63	-0.28	-0.11	-1.12	-0.94	-1.98	-1.68	-1.16	-0.25	0.135	0.405	0.335	0.375	0.685	0.745	-0.783331
YKL120W	OAC1	transport*	transporter activity*	0	-1.39	-2	-2.21	-3.66	-3.73	-4.15	-4.03	-3.93	-0.255	-3.095	-3.665	-3.335	-3.515	-3.385	-3.655	-3.735	-2.515	-0.275	-0.565	-0.835	-2.865	-3.475	-3.555	-3.675	-3.715	-3.815	-0.69	-0.79	-0.81	-0.71	-0.26	0.25	-1.6	-1.14	-0.77	-0.1	0.02	0.3	-1.84	-1.47	-1.39	-1.24	-0.51	-0.3	-0.699305
YKL154W	SRP102	protein targeting to ER*	nucleotide binding*	0	-1.33	-1.6	-1.75	-2.61	-2.76	-2.98	-3.05	-2.89	-0.47	-0.9	-1.56	-1.98	-2.26	-2.48	-2.66	-2.67	-2.96	-0.575	-0.705	-0.925	-1.955	-2.515	-2.985	-2.945	-3.285	-3.445	-1.5	-0.94	-0.94	-1.01	-0.43	-0.21	-2.32	-1.91	-0.39	-0.28	0.25	0.07	-0.48	-0.8	-0.48	0.03	-0.1	0.1	-0.903089
YKL212W	SAC1	exocytosis*	inositol or phosphatidylinositol phosphatase activity*	0	-0.9	-1.07	-1.19	-2.3	-2.4	-3.33	-3.59	-3.5	0.03	-0.99	-1.73	-2.44	-3.06	-3.04	-2.9	-2.88	-3.04	-0.02	-0.14	-0.17	-0.94	-1.8	-2.33	-2.44	-2.4	-2.31	-0.93	-0.76	-0.25	-0.2	-0.27	-0.3	-0.7	-0.74	-0.56	-0.43	-0.13	-0.06	-0.08	0.18	0.15	0.2	0.3	0.28	-0.744269
YKL216W	URA1	metabolic process*	catalytic activity*	0	-3.68	-2.19	-1.58	-2.16	-2.16	-2.86	-3.28	-3.2	0.035	-4.125	-2.935	-2.225	-2.785	-2.755	-2.885	-2.885	-3.325	0.445	-0.265	-0.755	-1.785	-2.195	-2.585	-2.435	-2.235	-2.685	-0.48	-0.64	-0.23	-0.02	0.2	0.34	-1.27	-0.95	-0.52	-0.21	-0.15	0.24	-0.555	-0.375	-0.035	-0.135	0.165	0.525	-0.19
YKR057W	RPS21A	translation*	structural constituent of ribosome	0	-2.38	-2.74	-2	-1.72	-1.97	-1.81	-2.2	-2.33	-0.135	-3.965	-3.605	-2.775	-2.525	-2.815	-2.885	-2.865	-2.775	0.36	0.12	-0.39	-3.07	-3.43	-3.32	-3.38	-3.19	-3.03	-1.27	-0.67	-0.57	-0.62	-0.12	0.03	-2.58	-1.78	-0.48	-0.33	0.03	0.21	-1.915	-1.665	-1.015	-0.555	-0.545	-0.155	-0.455014
YKR092C	SRP40	ribosome biogenesis and assembly*	molecular_function	0	-3.82	-3.69	-1.77	-2.96	-2.25	-2.23	-1.89	-1.27	-0.005	-4.105	-3.875	-3.205	-3.065	-2.895	-2.665	-2.505	-1.775	0.055	-0.745	-1.235	-3.445	-4.165	-4.615	-4.615	-4.735	-4.465	-1.06	-0.83	-0.4	-0.25	-0.11	-0.02	-0.62	-0.49	-1.45	-1.36	-0.56	0.02	-2.88	-2.34	-1.96	-1.52	-0.79	-0.76	-0.41
YKR094C	RPL40B	translation*	structural constituent of ribosome*	0	-1.76	-2.25	-1.69	-1.65	-1.79	-2.11	-2.4	-2.61	0.005	-3.155	-2.875	-1.815	-1.395	-1.675	-1.705	-1.845	-1.835	0.175	0.065	-0.285	-3.465	-3.165	-2.675	-2.905	-3.075	-2.615	-0.28	0.15	-0.12	-0.28	-0.04	-0.01	-0.91	-0.67	0.06	0	0.12	-0.01	-1.09	-0.98	-0.72	-0.4	-0.58	-0.58	-0.463155
YKR094C	RPL40B	translation*	structural constituent of ribosome*	0	-1.76	-2.25	-1.69	-1.65	-1.79	-2.11	-2.4	-2.61	0.005	-3.155	-2.875	-1.815	-1.395	-1.675	-1.705	-1.845	-1.835	0.175	0.065	-0.285	-3.465	-3.165	-2.675	-2.905	-3.075	-2.615	-0.28	0.15	-0.12	-0.28	-0.04	-0.01	-0.91	-0.67	0.06	0	0.12	-0.01	-1.09	-0.98	-0.72	-0.4	-0.58	-0.58	-0.463155
YLL045C	RPL8B	translation*	structural constituent of ribosome	0	-2.42	-2.53	-1.52	-1.7	-1.88	-2.41	-3.15	-3.71	-0.155	-3.885	-4.115	-2.135	-2.325	-2.605	-2.565	-2.545	-2.725	0.045	-0.055	-0.305	-3.995	-3.245	-3.165	-2.835	-2.625	-2.965	-0.72	-0.66	-0.55	-0.26	-0.11	-0.07	-0.98	-0.86	-0.99	-0.87	-0.57	0.06	-1.665	-1.405	-0.995	-0.945	-0.415	-0.425	-0.207929
YLL045C	RPL8B	translation*	structural constituent of ribosome	0	-2.42	-2.53	-1.52	-1.7	-1.88	-2.41	-3.15	-3.71	-0.155	-3.885	-4.115	-2.135	-2.325	-2.605	-2.565	-2.545	-2.725	0.045	-0.055	-0.305	-3.995	-3.245	-3.165	-2.835	-2.625	-2.965	-0.72	-0.66	-0.55	-0.26	-0.11	-0.07	-0.98	-0.86	-0.99	-0.87	-0.57	0.06	-1.665	-1.405	-0.995	-0.945	-0.415	-0.425	-0.207929
YLR029C	RPL15A	translation	RNA binding*	0	-1.08	-1.54	-0.73	-1.08	-1.23	-1.66	-2.53	-3.23	-0.24	-2.16	-3.59	-1.59	-2.17	-2.91	-3.06	-2.82	-2.66	-0.14	-0.53	0.03	-3.99	-3.68	-3.83	-3.41	-2.93	-3.42	0.84	0.76	0.49	0.04	0.21	0.26	-0.42	-0.08	0.34	0.28	0.18	-0.12	0.075	0.275	0.465	0.355	0.575	0.545	-0.298941
YLR029C	RPL15A	translation	RNA binding*	0	-1.08	-1.54	-0.73	-1.08	-1.23	-1.66	-2.53	-3.23	-0.24	-2.16	-3.59	-1.59	-2.17	-2.91	-3.06	-2.82	-2.66	-0.14	-0.53	0.03	-3.99	-3.68	-3.83	-3.41	-2.93	-3.42	0.84	0.76	0.49	0.04	0.21	0.26	-0.42	-0.08	0.34	0.28	0.18	-0.12	0.075	0.275	0.465	0.355	0.575	0.545	-0.298941
YLR048W	RPS0B	translation*	DNA binding*	0	-1.34	-1.6	-0.99	-1.36	-1.51	-1.65	-2.29	-2.88	-0.295	-4.415	-4.275	-2.345	-2.655	-2.945	-2.905	-2.725	-2.995	-0.25	-0.18	-0.3	-4.13	-3.77	-4.14	-3.55	-3.49	-3.49	-0.12	-0.42	-0.03	0.09	0.01	0.08	-0.73	-0.34	-0.24	-0.21	-0.28	0.05	-0.43	-0.21	0.19	0.25	0.65	0.57	-0.17173
YLR048W	RPS0B	translation*	DNA binding*	0	-1.34	-1.6	-0.99	-1.36	-1.51	-1.65	-2.29	-2.88	-0.295	-4.415	-4.275	-2.345	-2.655	-2.945	-2.905	-2.725	-2.995	-0.25	-0.18	-0.3	-4.13	-3.77	-4.14	-3.55	-3.49	-3.49	-0.12	-0.42	-0.03	0.09	0.01	0.08	-0.73	-0.34	-0.24	-0.21	-0.28	0.05	-0.43	-0.21	0.19	0.25	0.65	0.57	-0.17173
YLR048W	RPS0B	translation*	DNA binding*	0	-1.34	-1.6	-0.99	-1.36	-1.51	-1.65	-2.29	-2.88	-0.295	-4.415	-4.275	-2.345	-2.655	-2.945	-2.905	-2.725	-2.995	-0.25	-0.18	-0.3	-4.13	-3.77	-4.14	-3.55	-3.49	-3.49	-0.12	-0.42	-0.03	0.09	0.01	0.08	-0.73	-0.34	-0.24	-0.21	-0.28	0.05	-0.43	-0.21	0.19	0.25	0.65	0.57	-0.17173
YLR058C	SHM2	one-carbon compound metabolic process*	transferase activity*	0	-2.68	-2.07	-1.88	-2.05	-1.73	-1.75	-2.01	-2.09	-0.115	-2.985	-2.835	-2.505	-3.175	-3.115	-3.145	-3.175	-3.285	0.075	-0.085	-0.595	-2.165	-2.695	-2.855	-2.595	-2.745	-2.795	-1.1	-1.17	-0.66	-0.3	-0.12	0.33	-0.29	-0.32	-1.49	-1.15	-1.01	0.04	-1.715	-1.515	-1.435	-1.365	-0.545	-0.335	-0.407809
YLR060W	FRS1	translation*	nucleotide binding*	0	-0.94	-0.95	-1.12	-2.66	-2.66	-3.98	-4.56	-4.15	0.135	-1.775	-1.875	-2.205	-3.365	-3.495	-3.475	-3.425	-3.665	0.08	-0.15	-0.3	-1.28	-2.7	-3.39	-3.31	-3.41	-3.39	-0.93	-0.58	-0.23	-0.08	-0.1	-0.03	-0.14	-0.23	-0.62	-0.64	-0.21	0.05	-1.005	-0.595	-0.605	-0.755	-0.165	-0.585	-0.772545
YLR061W	RPL22A	translation	structural constituent of ribosome	0	-2.18	-2.67	-1.91	-2.65	-3	-3.78	-4.37	-4.83	0.135	-4.605	-4.265	-2.855	-3.035	-3.665	-3.795	-3.815	-3.865	0.26	0.15	-0.07	-4.29	-4.76	-4.84	-4.66	-4.52	-4.48	-0.9	-0.47	-0.53	-0.5	-0.15	-0.21	-1.49	-1.18	0.01	0.14	0.28	-0.11	-1.01	-0.61	-0.08	-0.02	0.07	0.44	-0.302008
YLR062C	BUD28	biological_process	molecular_function	0	-1.87	-2.88	-1.65	-1.87	-2.64	-3.03	-3.1	-2.67	-0.645	-2.755	-2.615	-2.565	-2.225	-3.135	-3.145	-3.235	-3.295	0.355	0.445	0.085	-3.005	-3.575	-3.845	-3.845	-3.725	-3.905	-1.15	-0.7	-0.89	-0.51	0.04	0.09	-0.91	-0.2	-0.26	-0.2	-0.02	0.16	-1.07	-0.83	-0.96	-0.74	-0.63	0.75	-0.31
YLR073C	YLR073C	biological_process	molecular_function	0	-3.05	-3.04	-2.22	-2.43	-2.61	-3.13	-3.09	-2.63	-0.11	-3.42	-3.25	-2.3	-3.11	-3.47	-3.62	-3.5	-3.44	0.055	-0.895	-1.215	-3.025	-3.175	-3.405	-3.375	-3.395	-3.395	-1.23	-1.27	-1.05	-0.79	-0.34	-0.09	-2	-1.35	-0.78	-0.3	-0.33	0.16	-1.675	-1.485	-0.915	-0.415	-0.395	-0.005	-0.0937858
YLR083C	EMP70	biological_process	molecular_function	0	-2.15	-1.7	-1.47	-2	-1.77	-2.34	-2.86	-2.51	-0.39	-1.65	-1.51	-1.98	-1.83	-2.08	-1.97	-2.2	-2.28	-0.535	-0.595	-0.765	-1.455	-2.445	-2.785	-2.945	-2.795	-2.935	-0.41	-0.19	-0.52	-0.28	-0.17	-0.12	-0.09	0.26	0.11	0.04	0.03	0.09	-1.095	-0.945	-0.885	-0.645	-0.685	-0.445	-0.419572
YLR146C	SPE4	pantothenate biosynthetic process*	transferase activity*	0	-1.14	-1	-1.24	-2.4	-2.29	-2.69	-2.77	-2.77	-0.125	-1.825	-2.245	-2.175	-2.345	-2.275	-2.115	-2.305	-2.285	-0.09	-0.4	-0.83	-1.76	-2.23	-2.34	-2.47	-2.4	-2.46	-0.9	-0.49	-0.45	-0.11	0.27	0.46	-2.08	-1.29	-0.57	-0.25	-0.14	0.42	-1.56	-1.23	-0.95	-0.61	-0.48	-0.35	-1.06
YLR175W	CBF5	cell cycle*	DNA binding*	0	-2.75	-2.38	-2.18	-2.47	-2.34	-3.22	-3.81	-3	-0.125	-6.005	-4.065	-3.305	-3.935	-4.135	-4.005	-4.105	-4.135	0.08	-0.15	-0.62	-2	-2.44	-3.08	-2.98	-3.38	-3.28	-0.97	-0.82	-0.33	-0.17	0.07	0.04	-1.34	-1.25	-0.81	-0.39	0.06	0.1	0.855	1.055	0.955	1.225	1.445	1.825	-0.153198
YLR179C	YLR179C	biological_process	molecular_function	0	-2.3	-2.52	-1.94	-3.1	-2.98	-3.64	-4.18	-4.03	0.255	-0.255	-1.645	-2.575	-2.725	-2.375	-1.905	-1.605	-1.225	-0.045	0.025	-0.045	-1.275	-3.045	-3.245	-3.355	-3.275	-3.365	-0.41	-0.02	-0.11	-0.08	0.01	0.17	-0.01	0.29	-0.04	-0.07	0.11	0.33	-0.17	0.36	0.51	0.53	0.69	1	-1.36696
YLR180W	SAM1	one-carbon compound metabolic process*	nucleotide binding*	0	-2.32	-2.47	-2.59	-2.89	-3.04	-3.42	-4.22	-4.11	0.3	-1.43	-2.29	-2.63	-2.8	-2.56	-2.48	-2.36	-2.55	-0.05	-0.27	-0.62	-3.09	-5.62	-5.44	-5.54	-5.56	-5.01	-1.43	-1.21	-0.58	-0.16	-0.22	-0.14	-0.55	-0.12	-1.02	-0.64	-0.59	0.21	-2.595	-1.745	-1.365	-1.165	-0.375	-0.445	-0.748214
YLR180W	SAM1	one-carbon compound metabolic process*	nucleotide binding*	0	-2.32	-2.47	-2.59	-2.89	-3.04	-3.42	-4.22	-4.11	0.3	-1.43	-2.29	-2.63	-2.8	-2.56	-2.48	-2.36	-2.55	-0.05	-0.27	-0.62	-3.09	-5.62	-5.44	-5.54	-5.56	-5.01	-1.43	-1.21	-0.58	-0.16	-0.22	-0.14	-0.55	-0.12	-1.02	-0.64	-0.59	0.21	-2.595	-1.745	-1.365	-1.165	-0.375	-0.445	-0.748214
YLR185W	RPL37A	translation	metal ion binding*	0	-1.95	-2.45	-1.68	-1.84	-2.09	-2.51	-2.77	-3.08	-0.015	-3.805	-3.525	-1.905	-1.585	-1.935	-1.965	-1.765	-1.825	0.235	0.275	0.025	-3.625	-3.085	-2.895	-2.805	-2.645	-2.765	0.1	0.27	0	-0.05	0.16	0.22	-1.13	-0.23	0.83	0.61	0.6	0.24	-0.315	-0.285	0.115	0.285	0.275	0.575	-0.105159
YLR186W	EMG1	ribosome biogenesis and assembly*	snoRNA binding	0	-2.06	-1.86	-1.36	-1.95	-1.92	-2.45	-2.49	-2.53	-0.015	-3.825	-2.345	-1.795	-2.065	-2.085	-2.095	-2.125	-2.325	0.255	0.035	-0.205	-1.975	-2.275	-2.325	-2.375	-2.585	-2.605	-1.01	-0.64	-0.47	-0.35	0.01	0.35	-1.42	-1.12	-0.79	-0.55	-0.17	0.34	-1.875	-1.605	-1.425	-1.145	-0.775	-0.475	-0.29
YLR196W	PWP1	rRNA processing	molecular_function	0	-3.31	-2.57	-1.86	-2.47	-2.5	-3.51	-4.06	-3.58	0.005	-5.885	-3.515	-2.705	-3.275	-3.295	-3.385	-3.195	-3.225	0.325	-0.285	-0.605	-1.595	-2.125	-2.535	-2.485	-2.715	-2.845	-0.69	-0.58	-0.08	-0.09	0.09	0.32	-1.03	-1.12	-1.18	-0.84	-0.31	0.17	-0.17	0.05	-0.04	0.12	0.43	0.51	-0.01
YLR197W	SIK1	ribosome biogenesis and assembly*	molecular_function	0	-3.3	-2.43	-1.92	-2.53	-2.11	-3.25	-3.75	-3.44	0.03	-5.61	-4.19	-3.45	-4.09	-4.24	-4.28	-4.31	-4.28	0.245	-0.115	-0.535	-1.865	-2.525	-2.915	-2.945	-3.125	-3.135	-1.08	-0.86	-0.47	-0.37	-0.21	0	-2.51	-2.2	-0.95	-0.48	-0.08	-0.3	0.53	0.75	0.96	1.12	1.35	1.3	-0.239702
YLR249W	YEF3	translation*	nucleotide binding*	0	-2.4	-1.48	-1.43	-2.05	-1.42	-2.91	-3.86	-3.17	0	-3.6	-2.45	-1.53	-3.02	-3.35	-3.27	-3.35	-3.51	0.165	0.275	0.275	-0.855	-1.765	-2.645	-2.395	-2.425	-2.535	-0.15	-0.32	-0.12	0.01	0.07	0.27	0.53	0.32	0.02	-0.18	-0.03	0.27	1.11	1.13	1.04	0.96	0.99	0.8	-0.273585
YLR264W	RPS28B	translation*	structural constituent of ribosome	0	-2.06	-2.47	-2.01	-2.6	-2.87	-3.18	-3.91	-3.74	-0.045	-3.705	-3.285	-2.525	-2.955	-3.365	-3.455	-3.525	-3.405	0.175	-0.145	-0.695	-3.005	-3.075	-3.235	-3.275	-3.205	-3.095	-1.24	-0.8	-0.6	-0.59	-0.2	-0.18	-2.98	-2.17	-0.26	-0.08	0.07	0.01	-1.23	-0.86	-0.26	-0.02	0.17	0.34	-0.320383
YLR264W	RPS28B	translation*	structural constituent of ribosome	0	-2.06	-2.47	-2.01	-2.6	-2.87	-3.18	-3.91	-3.74	-0.045	-3.705	-3.285	-2.525	-2.955	-3.365	-3.455	-3.525	-3.405	0.175	-0.145	-0.695	-3.005	-3.075	-3.235	-3.275	-3.205	-3.095	-1.24	-0.8	-0.6	-0.59	-0.2	-0.18	-2.98	-2.17	-0.26	-0.08	0.07	0.01	-1.23	-0.86	-0.26	-0.02	0.17	0.34	-0.320383
YLR293C	GSP1	transport*	nucleotide binding*	0	-2.03	-1.95	-2.03	-2.91	-3.09	-3.77	-3.88	-3.89	-0.02	-2.52	-2.22	-2.46	-3.17	-3.55	-3.71	-3.78	-3.99	0.2	-0.06	-0.23	-1.55	-2.78	-3.22	-3.42	-3.75	-3.62	-1.48	-1.39	-0.91	-0.64	-0.2	0.07	-1.5	-1.45	-1.17	-0.89	-0.5	0.11	-1.445	-1.405	-1.225	-0.805	-0.615	-0.485	-0.414574
YLR325C	RPL38	translation	structural constituent of ribosome	0	-2.46	-2.61	-2.01	-1.81	-2.09	-2.32	-2.31	-2.8	0.035	-4.715	-4.245	-3.005	-2.785	-3.295	-3.475	-3.395	-3.405	0.305	0.065	-0.265	-4.005	-3.535	-3.285	-3.435	-3.205	-3.345	-1.03	-0.55	-0.42	-0.66	-0.26	-0.15	-3.6	-2.76	-0.57	-0.13	0.02	-0.42	-1.195	-0.935	-0.225	0.055	0.025	0.135	-0.390013
YLR340W	RPP0	translation*	structural constituent of ribosome	0	-0.71	-1.09	-0.38	-0.52	-0.68	-0.77	-1.27	-1.57	-0.215	-2.525	-2.955	-1.645	-1.855	-2.005	-1.925	-1.975	-1.975	-0.26	-1.02	-0.32	-3.57	-3.55	-3.53	-3.14	-3.17	-2.92	-0.13	-0.56	-0.15	0.15	-0.08	-0.14	-0.76	-0.22	-0.6	-0.42	-0.44	-0.14	-0.635	-0.155	0.025	0.125	0.555	0.355	-0.19
YLR342W	FKS1	endocytosis*	transferase activity*	0	-1.25	-0.99	-1.61	-2.89	-2.56	-2.84	-2.28	-2.44	-0.535	-0.725	-1.145	-2.605	-2.985	-2.795	-2.555	-2.655	-2.695	-0.545	-0.815	-0.505	-1.665	-3.205	-2.915	-3.075	-3.225	-2.955	-1.12	-1.02	-1.02	-0.47	-0.18	-0.34	-0.35	-0.12	-0.54	-0.44	-0.39	-0.14	-1.2	-0.9	-0.88	-0.5	-0.5	-0.35	-0.69828
YLR344W	RPL26A	translation	RNA binding*	0	-2.45	-2.53	-1.74	-1.93	-2.15	-2.68	-3.67	-3.63	-0.05	-4.6	-3.89	-2.61	-2.33	-2.63	-2.63	-2.63	-2.36	0.2	-0.12	-0.53	-4.12	-3.84	-3.81	-3.96	-4.06	-3.92	-1.3	-0.5	-0.4	-0.43	-0.15	-0.03	-2.63	-2.36	-0.45	-0.54	-0.06	0.09	-1.815	-1.575	-0.925	-0.645	-0.445	-0.245	-0.286107
YLR359W	ADE13	purine nucleotide biosynthetic process*	catalytic activity*	0	-1.9	-1.52	-1.45	-2.28	-2.29	-2.39	-2.66	-2.79	0.26	-2.19	-2.46	-2.78	-3.21	-3.08	-3.12	-3.14	-3.41	0.21	-1.04e-17	-0.8	-1.81	-2.43	-2.6	-2.75	-2.99	-3.01	-0.9	-0.64	-0.36	-0.31	-0.16	-0.03	-0.88	-1.08	-0.79	-0.36	-0.37	-0.16	-0.69	-0.69	-0.53	-0.64	-0.25	-0.31	-0.839555
YLR367W	RPS22B	translation	structural constituent of ribosome	0	-1.48	-2.08	-1.63	-2.09	-2.48	-2.44	-2.25	-2.61	-0.365	-3.325	-4.085	-3.345	-2.905	-2.795	-3.425	-3.965	-3.835	0.19	0.14	-0.36	-3.95	-4.82	-4.15	-3.78	-3.55	-3.25	-1.19	-0.7	-0.45	-0.39	0.1	0.29	-2.62	-1.7	-0.35	0.05	0.05	0.43	-2.245	-1.995	-1.545	-0.865	-0.925	-0.705	-0.418727
YLR367W	RPS22B	translation	structural constituent of ribosome	0	-1.48	-2.08	-1.63	-2.09	-2.48	-2.44	-2.25	-2.61	-0.365	-3.325	-4.085	-3.345	-2.905	-2.795	-3.425	-3.965	-3.835	0.19	0.14	-0.36	-3.95	-4.82	-4.15	-3.78	-3.55	-3.25	-1.19	-0.7	-0.45	-0.39	0.1	0.29	-2.62	-1.7	-0.35	0.05	0.05	0.43	-2.245	-1.995	-1.545	-0.865	-0.925	-0.705	-0.418727
YLR367W	RPS22B	translation	structural constituent of ribosome	0	-1.48	-2.08	-1.63	-2.09	-2.48	-2.44	-2.25	-2.61	-0.365	-3.325	-4.085	-3.345	-2.905	-2.795	-3.425	-3.965	-3.835	0.19	0.14	-0.36	-3.95	-4.82	-4.15	-3.78	-3.55	-3.25	-1.19	-0.7	-0.45	-0.39	0.1	0.29	-2.62	-1.7	-0.35	0.05	0.05	0.43	-2.245	-1.995	-1.545	-0.865	-0.925	-0.705	-0.418727
YLR372W	SUR4	telomere maintenance*	fatty acid elongase activity	0	-2.48	-1.96	-1.84	-3.28	-3.16	-4.26	-4.72	-4.72	-0.355	-2.745	-2.675	-4.215	-5.305	-5.575	-5.505	-5.515	-5.505	-0.385	-0.545	-0.645	-2.355	-4.755	-5.165	-5.185	-5.495	-5.265	-1.63	-1.11	-1.04	-0.71	-0.22	-0.19	-1.9	-1.11	-0.45	-0.33	-0.22	-0.19	-1.555	-1.265	-0.735	-0.035	-0.165	0.215	-0.865431
YLR388W	RPS29A	translation	metal ion binding*	0	-2.09	-2.44	-1.72	-1.95	-2.11	-2.48	-2.77	-3.1	-0.1	-4.25	-3.58	-2.43	-2.21	-2.56	-2.61	-2.54	-2.38	0.28	0.24	-0.06	-3.5	-3.26	-2.95	-2.99	-3.15	-2.84	-0.2	-0.04	0.02	-0.1	0.14	0.17	-1.34	-0.67	0.76	0.55	0.42	0.25	-0.83	-0.74	-0.67	-0.22	-0.44	-0.13	-0.452241
YLR406C	RPL31B	translation	structural constituent of ribosome	0	-2.19	-2.81	-2.02	-1.82	-1.92	-1.86	-2.31	-2.54	-0.175	-4.925	-3.835	-2.305	-2.545	-3.155	-3.185	-3.105	-3.055	0.255	0.055	-0.475	-4.225	-3.725	-3.705	-3.755	-4.005	-3.545	-1.57	-0.82	-0.71	-0.79	-0.18	-0.13	-3.41	-3.08	-1.4	-0.52	-0.11	-0.07	-1.59	-1.56	-0.88	-0.6	-0.23	0.09	-0.18029
YLR406C	RPL31B	translation	structural constituent of ribosome	0	-2.19	-2.81	-2.02	-1.82	-1.92	-1.86	-2.31	-2.54	-0.175	-4.925	-3.835	-2.305	-2.545	-3.155	-3.185	-3.105	-3.055	0.255	0.055	-0.475	-4.225	-3.725	-3.705	-3.755	-4.005	-3.545	-1.57	-0.82	-0.71	-0.79	-0.18	-0.13	-3.41	-3.08	-1.4	-0.52	-0.11	-0.07	-1.59	-1.56	-0.88	-0.6	-0.23	0.09	-0.18029
YLR406C	RPL31B	translation	structural constituent of ribosome	0	-2.19	-2.81	-2.02	-1.82	-1.92	-1.86	-2.31	-2.54	-0.175	-4.925	-3.835	-2.305	-2.545	-3.155	-3.185	-3.105	-3.055	0.255	0.055	-0.475	-4.225	-3.725	-3.705	-3.755	-4.005	-3.545	-1.57	-0.82	-0.71	-0.79	-0.18	-0.13	-3.41	-3.08	-1.4	-0.52	-0.11	-0.07	-1.59	-1.56	-0.88	-0.6	-0.23	0.09	-0.18029
YLR432W	IMD3	metabolic process*	metal ion binding*	0	-1.79	-1.05	-1.38	-0.87	-0.86	-1.7	-2	-2.27	0.405	-3.665	-3.255	-3.275	-3.775	-3.315	-3.155	-3.145	-3.285	0.355	0.125	-0.505	-1.085	-1.345	-2.215	-2.135	-2.305	-2.235	-1.23	-1.18	-0.58	-0.34	-0.02	0.07	-0.82	-0.52	-0.97	-0.67	-0.42	0.07	-1.095	-0.635	-0.545	-0.525	-0.035	0.035	-0.387917
YLR441C	RPS1A	translation	structural constituent of ribosome	0	-1.52	-1.75	-1.14	-0.87	-1.29	-1.69	-1.75	-2.71	0.045	-3.075	-2.865	-1.335	-1.605	-2.005	-2.115	-2.085	-2.275	-0.09	-0.25	-0.6	-3.52	-3.4	-3.44	-3.49	-3.1	-3.46	-0.2	-0.17	-0.2	-0.31	-0.27	-0.22	-1.2	-0.77	0.04	0.12	-0.24	-0.46	-0.92	-0.77	-0.52	-0.61	-0.36	-0.55	-0.172097
YLR441C	RPS1A	translation	structural constituent of ribosome	0	-1.52	-1.75	-1.14	-0.87	-1.29	-1.69	-1.75	-2.71	0.045	-3.075	-2.865	-1.335	-1.605	-2.005	-2.115	-2.085	-2.275	-0.09	-0.25	-0.6	-3.52	-3.4	-3.44	-3.49	-3.1	-3.46	-0.2	-0.17	-0.2	-0.31	-0.27	-0.22	-1.2	-0.77	0.04	0.12	-0.24	-0.46	-0.92	-0.77	-0.52	-0.61	-0.36	-0.55	-0.172097
YLR448W	RPL6B	translation*	RNA binding*	0	-2.34	-2.68	-1.99	-2.78	-2.87	-3.18	-3.46	-3.85	-0.06	-4.43	-3.83	-2.6	-2.33	-2.62	-2.51	-2.54	-2.42	0.14	0.03	-0.24	-3.57	-3.14	-3	-3.02	-3.27	-2.79	-0.78	-0.53	-0.58	-0.44	-0.1	0.08	-1.7	-1.31	-0.23	-0.36	-0.06	-0.01	-1.645	-1.425	-1.165	-0.845	-0.855	-0.725	-0.00722719
YML018C	YML018C	biological_process	molecular_function	0	-1.78	-2.17	-2.43	-1.89	-2.26	-2.65	-2.92	-2.87	-0.56	-1.97	-2.3	-2.2	-2.16	-2.1	-2.01	-1.89	-1.15	-0.51	-0.56	-1.27	-2.61	-2.93	-2.98	-2.93	-3.03	-2.9	-1.59	-1.38	-1.34	-1	-0.55	-0.39	-0.47	-0.55	-0.89	-0.85	-0.52	-0.07	-1.74	-1.61	-1.56	-1.15	-1	-0.65	-0.373862
YML024W	RPS17A	translation*	structural constituent of ribosome	0	-1.54	-1.89	-1.39	-1.96	-2.13	-2.38	-3.13	-3.36	0.06	-3.4	-3.68	-2.42	-2.26	-2.69	-2.65	-2.79	-2.68	0.095	-0.165	-0.365	-3.905	-3.635	-3.535	-3.595	-3.565	-3.275	-0.59	0.2	-0.07	-0.4	-0.17	-0.28	-2.05	-1.87	0.09	-0.06	0.27	-0.16	-1.175	-0.795	-0.515	-0.305	-0.435	-0.535	-0.34
YML026C	RPS18B	translation	RNA binding*	0	-2.17	-2.62	-1.85	-2.19	-2.65	-2.95	-3.86	-3.92	-0.08	-4.13	-3.76	-2.46	-2.37	-2.9	-3.03	-3.1	-3	0.235	0.105	-0.315	-3.855	-3.655	-3.955	-4.035	-4.055	-3.875	-1.39	-0.69	-0.64	-0.65	-0.31	-0.32	-2.92	-2.38	-0.59	-0.39	-0.09	-0.17	-1.53	-1.23	-0.54	-0.48	-0.13	-0.23	-0.294263
YML056C	IMD4	biological_process*	metal ion binding*	0	-3.48	-3.35	-2.99	-4.11	-4.06	-4.42	-4.74	-4.56	-0.05	-4.58	-4.2	-4.68	-5.07	-4.61	-4.47	-4.35	-4.25	0.21	-0.31	-0.95	-2.31	-3.86	-4.16	-4.25	-4.56	-4.28	-1.68	-1.78	-1.33	-0.57	-0.03	0.44	-2.77	-2.28	-1.81	-1.47	-0.62	0.25	-3.03	-2.49	-2.15	-1.72	-1.39	-0.83	-0.476211
YML056C	IMD4	biological_process*	metal ion binding*	0	-3.48	-3.35	-2.99	-4.11	-4.06	-4.42	-4.74	-4.56	-0.05	-4.58	-4.2	-4.68	-5.07	-4.61	-4.47	-4.35	-4.25	0.21	-0.31	-0.95	-2.31	-3.86	-4.16	-4.25	-4.56	-4.28	-1.68	-1.78	-1.33	-0.57	-0.03	0.44	-2.77	-2.28	-1.81	-1.47	-0.62	0.25	-3.03	-2.49	-2.15	-1.72	-1.39	-0.83	-0.476211
YML063W	RPS1B	translation	structural constituent of ribosome	0	-2.02	-2.4	-1.79	-1.9	-2.19	-2.63	-3.17	-3.31	-0.16	-3.79	-3.96	-2.52	-2.27	-2.82	-2.92	-3.04	-3.21	-0.155	-0.495	-0.665	-4.335	-4.245	-4.575	-4.575	-4.825	-4.795	-0.9	-0.51	-0.47	-0.45	-0.27	-0.18	-1.82	-1.74	-0.55	-0.33	-0.32	-0.36	-1.33	-1.25	-1.09	-0.95	-0.74	-0.76	-0.140822
YML073C	RPL6A	translation*	RNA binding*	0	-1.76	-1.96	-1.38	-1.32	-1.4	-1.48	-2.01	-2.71	-0.02	-4.27	-3.6	-2.12	-1.6	-1.79	-1.78	-1.85	-1.84	0.135	0.105	-0.095	-3.915	-2.945	-2.715	-2.565	-2.605	-1.905	-0.21	-0.06	-0.17	-0.15	-0.03	0.12	-1.35	-1.26	-0.01	-0.05	0.05	0.05	-0.765	-0.705	-0.535	-0.285	-0.425	-0.545	-0.0628026
YMR011W	HXT2	transport*	transporter activity*	0	2.31	-0.93	1.12	-1.59	-0.94	-1.64	-2.06	-0.97	0.095	0.285	0.565	-1.215	-3.855	-3.315	-2.725	-2.155	-2.285	-0.68	0.64	-0.42	-1.21	-5.32	-6.04	-5.9	-6.08	-4.69	1.61	0.31	-0.36	-1.14	-0.41	0.75	-1.47	-1.09	-1.02	-0.67	-0.74	-0.83	-1.325	-0.105	1.055	1.675	2.355	2.435	0.0528832
YMR093W	UTP15	ribosome biogenesis and assembly*	snoRNA binding	0	-2.5	-1.95	-1.5	-1.89	-1.81	-2.52	-2.84	-2.4	0.03	-4.77	-2.92	-2.17	-2.77	-2.94	-3	-2.89	-2.72	0.045	-0.505	-0.825	-1.765	-2.155	-2.415	-2.365	-2.425	-2.345	-1	-0.79	-0.44	-0.24	0.02	0.14	-1.28	-0.76	-0.6	-0.32	-0.18	0.21	-1.01	-0.86	-0.61	-0.5	-0.2	0.04	-0.0781159
YMR116C	ASC1	telomere maintenance*	signal transducer activity	0	-1.08	-1.21	-0.81	-1.59	-1.7	-2.07	-2.51	-2.93	-0.17	-2.86	-3.89	-2.21	-2.31	-2.94	-2.95	-2.86	-2.89	-0.075	-0.535	0.065	-3.905	-3.615	-3.595	-3.175	-2.815	-2.815	0.03	-0.39	-0.19	0.17	0.09	-0.07	-1.21	-0.5	-0.6	-0.33	-0.38	-0.17	-0.41	-0.28	0.07	0.24	0.43	0.83	-0.188645
YMR116C	ASC1	telomere maintenance*	signal transducer activity	0	-1.08	-1.21	-0.81	-1.59	-1.7	-2.07	-2.51	-2.93	-0.17	-2.86	-3.89	-2.21	-2.31	-2.94	-2.95	-2.86	-2.89	-0.075	-0.535	0.065	-3.905	-3.615	-3.595	-3.175	-2.815	-2.815	0.03	-0.39	-0.19	0.17	0.09	-0.07	-1.21	-0.5	-0.6	-0.33	-0.38	-0.17	-0.41	-0.28	0.07	0.24	0.43	0.83	-0.188645
YMR131C	RRB1	ribosome biogenesis and assembly*	molecular_function	0	-3.15	-2.35	-1.56	-1.85	-1.71	-2.86	-3.71	-2.66	-0.07	-4.5	-2.83	-2.18	-2.63	-2.93	-2.96	-2.98	-3.09	0.32	-0.2	-0.46	-1.28	-1.92	-2.36	-2.39	-2.55	-2.47	-0.65	-0.44	-0.4	-0.44	-0.16	-0.02	-1	-0.88	-0.7	-0.55	-0.17	-0.12	-0.55	-0.49	-0.36	-0.37	-0.08	-0.2	-0.176296
YMR142C	RPL13B	translation*	structural constituent of ribosome	0	-1.82	-1.88	-1.09	-1.5	-1.75	-2.25	-2.76	-3.22	0.21	-3.31	-3.01	-1.46	-1.6	-1.92	-1.93	-1.81	-1.93	0.29	0.29	0.09	-3.34	-2.97	-2.9	-2.49	-2.6	-2.34	-0.16	-0.16	-0.15	-0.27	-0.15	-0.16	-1.34	-1.21	-0.11	-0.19	-0.1	-0.24	-0.44	-0.18	-0.07	0.09	0.03	-0.18	-0.190678
YMR143W	RPS16A	translation*	structural constituent of ribosome	0	-1.52	-1.98	-1.53	-1.73	-2.19	-2.67	-2.87	-3.58	-0.025	-3.025	-2.745	-1.725	-1.605	-2.015	-2.095	-2.125	-1.815	0.19	-0.02	-0.26	-3.33	-2.82	-2.81	-2.94	-2.59	-2.81	-0.3	-0.16	-0.23	-0.25	0	0.03	-1.63	-0.95	0.07	0.01	-0.1	0.11	-0.865	-0.835	-0.445	-0.235	-0.295	-0.045	-0.3
YMR194W	RPL36A	translation	RNA binding*	0	-2.23	-2.68	-1.95	-2.01	-2.1	-2	-2.22	-2.06	-0.18	-4.13	-3.28	-2.31	-1.86	-2.08	-2.04	-2.06	-1.92	0.295	0.095	-0.435	-3.365	-3.005	-2.695	-2.835	-3.025	-2.575	-1.72	-0.92	-0.97	-0.92	-0.23	-0.19	-2.97	-2.59	-1.15	-0.74	0.13	0.01	-2.22	-2.07	-1.38	-0.84	-0.74	-0.25	-0.346644
YMR194W	RPL36A	translation	RNA binding*	0	-2.23	-2.68	-1.95	-2.01	-2.1	-2	-2.22	-2.06	-0.18	-4.13	-3.28	-2.31	-1.86	-2.08	-2.04	-2.06	-1.92	0.295	0.095	-0.435	-3.365	-3.005	-2.695	-2.835	-3.025	-2.575	-1.72	-0.92	-0.97	-0.92	-0.23	-0.19	-2.97	-2.59	-1.15	-0.74	0.13	0.01	-2.22	-2.07	-1.38	-0.84	-0.74	-0.25	-0.346644
YMR217W	GUA1	biosynthetic process*	nucleotide binding*	0	-3.98	-2.81	-1.8	-2.44	-1.91	-3.59	-4.15	-4.12	0.15	-4.17	-3.06	-2.35	-3.55	-3.7	-3.61	-3.56	-3.85	0.165	-0.255	-0.635	-1.795	-3.255	-3.855	-3.815	-3.845	-3.945	-0.64	-0.77	-0.13	0.03	0.26	0.45	-0.38	-0.12	-0.9	-0.41	-0.36	0.59	-1.17	-0.93	-0.91	-0.83	-0.37	-0.22	-0.233335
YMR230W	RPS10B	translation	structural constituent of ribosome	0	-1.76	-2.08	-1.49	-1.44	-1.94	-1.88	-1.67	-2.3	-0.045	-3.435	-3.065	-1.935	-1.875	-2.465	-2.605	-2.575	-2.645	0.405	0.235	-0.135	-3.165	-3.515	-3.635	-3.715	-3.395	-3.675	-0.89	-0.37	-0.29	-0.27	-0.09	-0.13	-2.62	-1.75	-0.11	0.07	0.15	0.02	-1.065	-1.075	-0.465	-0.105	-0.145	0.185	-0.36
YMR241W	YHM2	transport*	DNA binding*	0	-2.43	-1.35	-0.7	-2.27	-1.73	-2.88	-2.88	-2.66	0.135	-1.805	-2.555	-2.455	-3.145	-2.765	-2.715	-2.715	-2.765	0.02	0.11	-0.26	-1.68	-2.85	-3.55	-3.84	-3.96	-3.88	-0.61	-0.69	-0.23	-0.09	0.01	0.41	0.28	0.49	0.01	0.67	0.39	0.7	-0.28	0.04	0.09	-0.22	0.15	0.36	-1.09101
YMR242C	RPL20A	translation	structural constituent of ribosome	0	-2.08	-2.77	-2.18	-2.66	-2.75	-2.9	-3.33	-3.98	0.15	-3.7	-4.44	-2.58	-2.84	-3.12	-3.21	-2.95	-3.04	0.09	-0.1	-0.61	-4.57	-4.65	-4.43	-4.03	-3.69	-3.88	-1.43	-1.02	-0.84	-0.52	-0.33	-0.1	-2.71	-2.1	-1.12	-0.73	-0.44	-0.05	-1.66	-1	-0.42	-0.11	0.37	0.53	-0.35
YMR290C	HAS1	ribosome biogenesis and assembly*	nucleotide binding*	0	-3.89	-2.69	-1.88	-1.99	-1.32	-2.13	-2.42	-2.21	-0.015	-4.865	-3.535	-2.845	-3.155	-2.915	-2.905	-2.855	-2.605	0.26	-0.53	-0.71	-1.83	-2.55	-2.78	-2.8	-2.57	-2.61	-1.19	-1.04	-0.6	-0.41	-0.07	0.11	-1.08	-0.95	-1.03	-0.98	-0.54	0.23	-0.705	-0.335	-0.355	-0.235	0.265	0.145	-0.34
YMR296C	LCB1	biosynthetic process*	transferase activity*	0	-0.64	-1.04	-1.26	-2.03	-2.31	-3.1	-3.33	-3.52	-0.445	-1.155	-1.125	-1.805	-2.085	-2.235	-2.255	-2.295	-2.475	-0.545	-0.745	-0.605	-0.995	-1.865	-2.175	-2.285	-2.455	-2.395	-0.54	-0.96	-0.38	-0.13	-0.17	-0.14	0.05	0.07	-1.32	-1.07	-0.72	0.01	-1.705	-1.365	-1.355	-1.035	-0.735	-0.745	-0.406932
YMR309C	NIP1	transport*	translation initiation factor activity	0	-1.38	-1.53	-1.47	-1.96	-1.94	-2.35	-2.45	-2.63	-0.015	-3.335	-2.645	-2.205	-2.585	-2.815	-2.815	-2.855	-2.905	0.19	-0.14	-0.38	-1.79	-2.01	-2.12	-1.98	-1.88	-2	-0.62	-0.66	-0.32	-0.16	-0.06	0	-0.3	-0.11	0.14	-0.19	-0.1	0.08	-0.525	-0.255	-0.055	-0.025	0.155	-0.035	0.0515906
YMR318C	ADH6	aldehyde metabolic process*	metal ion binding*	0	-0.54	-1.24	-1.95	-4.35	-4.53	-5.23	-5.24	-5.47	0.145	-0.175	-1.165	-2.755	-4.585	-4.625	-4.725	-4.695	-4.725	-0.005	-0.055	-0.275	-1.705	-5.045	-5.655	-6.125	-6.195	-5.565	-0.21	-0.39	-0.29	-0.21	0.13	0.46	-1.78	-1.35	-1.74	-1.21	-1.09	-0.31	-1.7	-1	-0.49	-0.23	0.59	0.98	-1.16964
YMR321C	YMR321C	biological_process	molecular_function*	0	-2.07	-1.96	-1.17	-2.66	-3.29	-4.22	-4.54	-5.07	-0.135	-2.295	-2.455	-2.425	-3.705	-3.855	-3.775	-3.835	-3.485	-0.185	-0.555	-0.855	-2.115	-3.115	-3.965	-4.395	-4.775	-4.935	-0.08	0.38	-0.58	-0.71	-0.34	-0.16	-2.55	-1.92	-0.92	-0.66	-0.33	-0.18	-2.01	-1.93	-1.57	-1.36	-1.1	-1.1	-0.86
YNL062C	GCD10	ribosome biogenesis and assembly*	RNA binding*	0	-3.24	-2.14	-1.34	-1.71	-1.83	-2.55	-3	-2.94	-0.135	-4.555	-2.985	-2.265	-2.775	-3.085	-3.025	-3.035	-3.105	0.16	-0.6	-0.6	-1.4	-2.26	-2.97	-3.04	-2.9	-3.08	-0.81	-0.84	-0.5	-0.52	-0.29	-0.01	-1.36	-1.07	-0.76	-0.36	-0.08	-0.08	-0.965	-0.715	-0.585	-0.625	-0.215	-0.505	0.0445225
YNL067W	RPL9B	translation	structural constituent of ribosome	0	-1.62	-1.98	-1.13	-1.7	-1.84	-1.92	-2.06	-2.2	0.125	-2.895	-3.765	-1.925	-2.405	-2.965	-3.175	-3.105	-3.235	0.185	0.215	0.025	-3.595	-3.595	-3.365	-3.075	-2.445	-3.015	-0.19	-0.21	0	-0.09	0.1	0.12	-1.39	-0.64	0.27	0.36	0.21	-0.06	-0.39	-0.11	0.22	0.15	0.43	0.52	-0.122887
YNL067W	RPL9B	translation	structural constituent of ribosome	0	-1.62	-1.98	-1.13	-1.7	-1.84	-1.92	-2.06	-2.2	0.125	-2.895	-3.765	-1.925	-2.405	-2.965	-3.175	-3.105	-3.235	0.185	0.215	0.025	-3.595	-3.595	-3.365	-3.075	-2.445	-3.015	-0.19	-0.21	0	-0.09	0.1	0.12	-1.39	-0.64	0.27	0.36	0.21	-0.06	-0.39	-0.11	0.22	0.15	0.43	0.52	-0.122887
YNL069C	RPL16B	translation	RNA binding*	0	-1.62	-1.94	-1.36	-1.76	-1.95	-2.43	-2.82	-3.79	-0.295	-3.895	-4.345	-2.495	-2.515	-2.945	-2.925	-2.745	-2.815	-0.18	-0.32	-0.29	-4.2	-3.7	-3.65	-3.19	-2.9	-3.11	-0.19	-0.14	-0.09	-0.12	-0.03	0.02	-1	-0.38	0.17	0.1	-0.04	0.02	0.44	0.5	0.62	0.75	0.84	1.08	-0.243261
YNL096C	RPS7B	translation*	structural constituent of ribosome	0	-1.97	-2.51	-1.8	-2.28	-2.48	-3.16	-3.46	-3.63	-0.04	-4.45	-3.44	-2.15	-2.29	-2.49	-2.33	-2.22	-2.15	0.145	-0.115	-0.565	-4.015	-3.375	-3.455	-3.485	-3.415	-3.405	-0.26	-0.18	-0.25	-0.41	-0.13	0.06	-1.62	-1.1	-0.12	-0.18	-0.12	-0.33	-0.645	-0.465	-0.365	-0.265	-0.035	0.165	-0.185175
YNL096C	RPS7B	translation*	structural constituent of ribosome	0	-1.97	-2.51	-1.8	-2.28	-2.48	-3.16	-3.46	-3.63	-0.04	-4.45	-3.44	-2.15	-2.29	-2.49	-2.33	-2.22	-2.15	0.145	-0.115	-0.565	-4.015	-3.375	-3.455	-3.485	-3.415	-3.405	-0.26	-0.18	-0.25	-0.41	-0.13	0.06	-1.62	-1.1	-0.12	-0.18	-0.12	-0.33	-0.645	-0.465	-0.365	-0.265	-0.035	0.165	-0.185175
YNL141W	AAH1	ribosome biogenesis and assembly*	hydrolase activity*	0	-4.26	-3.88	-2.41	-3.28	-2.73	-3.17	-4.1	-2.89	0.24	-3.81	-2.57	-2.77	-2.86	-3.32	-3.24	-3.49	-3.26	0.29	-0.74	-0.84	-2.14	-4.14	-4.56	-4.62	-5.04	-4.59	-0.9	-0.9	-0.61	-0.46	0.14	0.44	-0.07	0.56	0.54	0.78	0.68	1.14	-1.15	-0.77	-0.52	-0.41	-0.11	-0.07	-0.283703
YNL153C	GIM3	protein folding*	unfolded protein binding*	0	-1.45	-1.73	-1.38	-2.34	-2.83	-3.02	-3.74	-3.04	-0.11	-1.51	-1.78	-2.06	-2.48	-2.51	-2.39	-2.42	-2.46	0.205	0.015	-0.175	-0.785	-1.775	-1.905	-2.245	-2.135	-2.015	-0.29	0.12	-0.43	-0.53	-0.4	-0.09	-0.7	-0.38	0.34	-0.02	0.06	-0.24	-0.35	-0.03	-0.01	-0.06	-0.03	0.01	-1.03
YNL162W	RPL42A	translation*	structural constituent of ribosome	0	-1.6	-2	-1.22	-1.54	-1.87	-2.13	-2.8	-3.5	-0.11	-4.47	-3.4	-1.49	-1.45	-2.03	-2	-1.94	-2.1	0.07	0.07	-0.01	-3.4	-2.81	-2.92	-2.78	-2.38	-2.8	0.15	0.21	0.07	-0.1	-0.1	-0.05	-0.74	-0.09	0.8	0.7	0.4	-0.06	0.03	0.05	0.38	0.41	0.28	0.47	-0.141984
YNL178W	RPS3	translation*	RNA binding*	0	-1.23	-1.46	-0.93	-1.35	-1.35	-1.75	-2.32	-3.01	-0.32	-3.39	-4.22	-2.08	-2.19	-2.47	-2.71	-2.83	-3.01	-0.19	-0.66	-0.1	-4.34	-3.58	-3.19	-2.7	-2.51	-2.62	-0.12	-0.01	-0.07	-0.14	-0.07	0.12	-1.58	-1.31	-0.57	0.04	-0.16	-0.18	-0.315	-0.085	0.165	0.235	0.495	0.275	-0.234812
YNL220W	ADE12	telomere maintenance*	nucleotide binding*	0	-1.28	-0.72	-1.01	-2.75	-2.78	-3.3	-3.8	-3.14	0.17	-1.39	-2.09	-2.57	-3.13	-2.82	-2.76	-2.83	-2.61	0.09	0.28	-0.16	-0.49	-2.18	-2.71	-2.69	-3	-2.48	-0.43	-0.42	-0.8	-0.64	-0.2	0.09	-1.22	-1.06	-0.49	-0.36	-0.26	-0.16	-0.565	-0.195	-0.035	-0.055	0.225	0.285	-1.18862
YNL247W	YNL247W	translation*	nucleotide binding*	0	-1.82	-1.22	-1.05	-1.97	-2.03	-2.92	-3.46	-3.16	0.1	-2.06	-1.86	-1.96	-2.18	-2.21	-2.19	-2.29	-2.4	0.235	0.185	-0.035	-1.055	-1.845	-2.065	-2.145	-2.235	-2.305	-0.5	-0.61	-0.15	-0.03	0.02	0.09	-0.44	-0.47	-0.61	-0.58	-0.17	0.1	-0.935	-0.625	-0.595	-0.455	-0.135	-0.045	-0.634423
YNL248C	RPA49	transcription*	transferase activity*	0	-3.33	-2.9	-2.08	-2.26	-2.05	-2.76	-3.03	-2.83	0	-5.06	-3.76	-2.72	-2.65	-2.71	-2.71	-2.7	-3.02	0.205	-0.495	-0.715	-1.955	-2.115	-2.065	-1.965	-1.985	-2.175	-1.35	-1.3	-0.92	-0.75	-0.32	-0.12	-2.28	-1.7	-1.25	-0.8	-0.49	0.19	-1.495	-1.225	-0.995	-0.885	-0.455	-0.305	-0.03
YNL301C	RPL18B	translation	structural constituent of ribosome	0	-1.92	-2.62	-2.12	-2.7	-2.57	-2.56	-2.18	-2.42	-0.15	-2.49	-3.2	-2.73	-3.09	-3.45	-3.83	-4.28	-4.78	-0.01	-0.35	-0.86	-3.84	-4.13	-3.42	-3.01	-3.17	-2.97	-1.82	-1.44	-1.3	-1.14	-0.28	0.09	-2.79	-2.54	-1.82	-1.09	-0.68	0.12	-4.41	-3.89	-3.53	-3.26	-2.66	-2.2	-0.352645
YNL301C	RPL18B	translation	structural constituent of ribosome	0	-1.92	-2.62	-2.12	-2.7	-2.57	-2.56	-2.18	-2.42	-0.15	-2.49	-3.2	-2.73	-3.09	-3.45	-3.83	-4.28	-4.78	-0.01	-0.35	-0.86	-3.84	-4.13	-3.42	-3.01	-3.17	-2.97	-1.82	-1.44	-1.3	-1.14	-0.28	0.09	-2.79	-2.54	-1.82	-1.09	-0.68	0.12	-4.41	-3.89	-3.53	-3.26	-2.66	-2.2	-0.352645
YNL302C	RPS19B	translation*	structural constituent of ribosome	0	-1.46	-1.67	-1.2	-1.61	-1.67	-2.23	-2.77	-3.23	0.065	-3.445	-3.205	-2.055	-1.875	-2.095	-2.075	-2.125	-2.065	0.175	0.265	0.015	-3.525	-3.305	-3.155	-3.005	-3.315	-2.895	-0.46	-0.08	0.15	-0.04	0.07	0.16	-2	-1.6	-0.2	0.13	0.28	0.06	-1.06	-1.02	-0.49	-0.17	-0.28	-0.28	-0.48
YOL020W	TAT2	transport*	amino acid transmembrane transporter activity*	0	-2.36	-2.57	-2.45	-1.66	-0.86	-0.5	-0.17	0.22	-0.745	-3.095	-3.525	-3.845	-3.835	-2.725	-2.375	-2.155	-2.685	-0.46	-0.52	-1.15	-2.33	-3.21	-3.95	-4.16	-3.71	-3.94	0.27	0.08	-0.13	-0.21	-0.15	0.01	-4	-3.04	-2.72	-2.39	-1.82	-0.82	-0.695	0.115	0.245	0.595	0.765	1.105	-0.537475
YOL028C	YAP7	transcription*	DNA binding*	0	-1	-1.08	-0.99	-2.31	-2.76	-3.33	-4	-3.1	-0.07	-0.27	-1.27	-1.64	-2.72	-2.77	-2.76	-2.92	-2.78	-0.025	-0.365	-1.155	-1.265	-2.055	-2.585	-2.555	-2.675	-2.975	-0.51	-0.04	0.06	0.26	-0.19	-0.22	0.42	0.24	-0.04	-0.25	0.07	-0.18	-1.24	-0.76	-0.77	-0.76	-0.52	-1.31	-0.86061
YOL039W	RPP2A	translation*	structural constituent of ribosome	0	-1.84	-2.23	-1.68	-2.16	-2.62	-3.46	-4.07	-4.17	-0.055	-4.195	-3.935	-2.945	-3.205	-3.675	-3.795	-3.875	-3.945	0.205	0.065	-0.395	-4.115	-4.385	-4.505	-4.485	-4.975	-4.505	-1.52	-1	-0.42	-0.09	0.12	0.2	-3.05	-2.48	-0.97	-0.49	0.14	0.32	-2.105	-1.865	-0.995	-0.375	-0.355	-0.045	-0.25
YOL040C	RPS15	translation*	structural constituent of ribosome	0	-1.36	-1.52	-1.02	-1.22	-1.48	-2.02	-2.54	-3.15	-0.25	-3.78	-3.79	-2.05	-2.31	-2.75	-2.82	-2.77	-2.9	-0.2	-0.24	-0.37	-3.77	-3.28	-3.4	-3.34	-3.56	-3.3	-0.46	-0.38	-0.2	-0.3	-0.04	0.07	-1.61	-1.51	-0.65	-0.38	-0.21	0.15	-0.87	-0.71	-0.66	-0.43	-0.32	-0.35	-0.216909
YOL077C	BRX1	ribosome biogenesis and assembly*	rRNA primary transcript binding*	0	-3.98	-2.75	-1.69	-2.24	-2.16	-3.1	-3.52	-3.37	-0.025	-5.695	-3.705	-2.475	-3.305	-3.665	-3.845	-3.715	-3.835	0.18	-0.4	-0.8	-1.65	-2.1	-2.55	-2.61	-2.53	-2.88	-0.83	-0.5	-0.48	-0.51	-0.1	0.05	-2.12	-1.22	0.01	-0.06	0.21	-0.01	-0.16	-0.08	0.04	0.07	0.23	0.06	-0.0312245
YOL080C	REX4	rRNA processing*	hydrolase activity*	0	-3.61	-2.94	-2.11	-3.09	-2.9	-3.51	-3.66	-3.05	-0.05	-4.12	-2.79	-2.25	-2.46	-2.26	-2.11	-1.95	-2.09	0.255	-0.725	-0.755	-1.585	-2.505	-2.595	-2.475	-2.325	-2.445	-1.46	-1.01	-0.86	-0.99	-0.44	0.06	-2.04	-1.46	-0.34	-0.4	0.01	-0.15	-1.01	-0.93	-0.63	-0.59	-0.09	-0.13	-0.18
YOL097C	WRS1	translation*	nucleotide binding*	0	-1.91	-1.82	-1.65	-2.53	-2.6	-3.24	-3.43	-3.58	0.075	-2.135	-2.165	-2.405	-3.085	-2.975	-2.975	-2.945	-3.025	0.15	-0.12	-0.32	-1.5	-2.57	-2.67	-2.75	-2.81	-3.03	-1.26	-0.98	-0.69	-0.48	-0.11	0.03	-1.58	-1.48	-1.25	-0.69	-0.12	0.25	-2.125	-1.705	-1.285	-1.155	-0.485	-0.565	-0.579048
YOL120C	RPL18A	translation	structural constituent of ribosome	0	-2.3	-2.93	-2.11	-2.85	-3.4	-3.77	-4.02	-4.4	-0.12	-4.02	-4.07	-3	-3.25	-3.72	-3.88	-3.95	-4.11	0.135	-0.105	-0.635	-4.435	-4.895	-4.845	-4.805	-5.125	-4.675	-1.72	-1.35	-0.89	-0.57	-0.04	0.08	-3.39	-2.44	-1.53	-0.68	-0.5	0.13	-2.06	-1.62	-1	-0.63	-0.32	0.11	-0.233081
YOL124C	TRM11	ribosome biogenesis and assembly*	transferase activity*	0	-4.74	-2.74	-1.83	-2.54	-2.07	-3.18	-3.42	-2.92	-0.03	-5.76	-3.43	-2.59	-3.55	-3.66	-3.87	-3.74	-3.79	0.04	-0.96	-1.17	-2.4	-3.34	-3.92	-4.13	-4.17	-4.63	-0.89	-0.72	-0.43	-0.4	-0.18	0.07	-1.96	-1.59	-0.87	-0.61	-0.26	-0.06	-1.355	-1.185	-1.095	-0.935	-0.675	-0.505	-0.190477
YOR063W	RPL3	translation*	structural constituent of ribosome	0	-1.47	-1.7	-0.88	-1.45	-1.49	-2.16	-2.33	-2.49	-0.1	-2.58	-3.88	-1.66	-2.58	-3.28	-3.44	-3.42	-3.57	0.055	0.245	0.045	-3.385	-3.525	-3.725	-3.455	-3.325	-3.675	-0.17	-0.22	-0.05	-0.06	-0.1	-0.06	-0.36	-0.22	-0.4	-0.25	-0.17	0.08	-0.77	-0.71	-0.58	-0.76	-0.46	-0.49	-0.285894
YOR079C	ATX2	metal ion transport*	metal ion transmembrane transporter activity*	0	-0.85	-0.93	-1.11	-2.2	-2.59	-3.34	-3.7	-3.72	-0.505	-0.605	-1.115	-1.705	-1.985	-1.875	-1.695	-1.675	-1.835	-0.615	-0.575	-0.685	-1.365	-2.285	-2.215	-2.255	-2.425	-2.215	-0.47	-0.45	-0.08	0.02	0.02	-0.04	-1.33	-0.89	0.01	0.22	0.2	0.25	-1.38	-1.42	-1.32	-0.87	-1.03	-0.45	-0.920391
YOR095C	RKI1	ribosome biogenesis and assembly*	isomerase activity*	0	-2.93	-0.59	0.85	-1.37	-1.23	-2.33	-2.47	-2.1	-0.09	-4.34	-3.35	-2.31	-2.21	-2.55	-2.76	-3.04	-3.19	0.29	-0.16	-0.75	-2.32	-2.41	-2.83	-3.02	-3.28	-3.66	-0.23	0.09	0.67	0.52	0.24	0.23	-2.53	-1.69	-0.48	-0.06	0.04	0.16	-2.32	-1.93	-1.64	-1.28	-1.25	-1.11	-0.04
YOR096W	RPS7A	translation*	structural constituent of ribosome	0	-1.88	-2.2	-1.55	-1.52	-1.9	-2.29	-2.78	-3.31	0.065	-3.495	-3.915	-2.375	-2.035	-2.675	-2.765	-2.735	-2.855	0.32	0.24	4.16e-17	-3.79	-3.49	-3.47	-3.55	-3.67	-3.49	-0.67	-0.39	-0.28	-0.35	-0.11	0.02	-2.28	-1.73	-0.27	0.24	0.15	0	-0.93	-0.75	-0.23	-0.03	-0.02	0.25	-0.22199
YOR096W	RPS7A	translation*	structural constituent of ribosome	0	-1.88	-2.2	-1.55	-1.52	-1.9	-2.29	-2.78	-3.31	0.065	-3.495	-3.915	-2.375	-2.035	-2.675	-2.765	-2.735	-2.855	0.32	0.24	4.16e-17	-3.79	-3.49	-3.47	-3.55	-3.67	-3.49	-0.67	-0.39	-0.28	-0.35	-0.11	0.02	-2.28	-1.73	-0.27	0.24	0.15	0	-0.93	-0.75	-0.23	-0.03	-0.02	0.25	-0.22199
YOR108W	LEU9	metabolic process*	transferase activity*	0	-2.85	-2.93	-2	-3.29	-3.1	-3.64	-3.72	-3.67	-0.08	-4.45	-4.4	-3.28	-3.29	-3.35	-3.37	-3.25	-2.24	-0.015	-0.205	-0.755	-2.615	-2.855	-3.085	-3.315	-3.495	-3.785	-0.08	-0.07	-0.66	-0.45	-0.06	0.33	-1.56	-1.25	-1.47	-1.24	-0.68	0.14	-1.755	-1.515	-1.495	-1.455	-0.575	-0.405	-0.18
YOR128C	ADE2	purine nucleotide biosynthetic process*	ATP binding*	0	-1.93	-1.52	-1.29	-2.17	-2.28	-2.5	-2.83	-3.01	0.195	-1.485	-1.425	-1.665	-2.715	-2.585	-2.635	-2.695	-3.035	0.205	-0.025	-0.545	-1.035	-1.545	-2.015	-1.835	-1.935	-1.895	-0.2	-0.11	-0.02	0.05	0.01	0.2	-0.3	-0.17	-0.16	-0.1	-0.02	0.07	-0.6	-0.36	-0.46	-0.46	-0.3	-0.19	-0.438852
YOR167C	RPS28A	translation	structural constituent of ribosome	0	-1.69	-1.95	-1.34	-1.85	-2.35	-2.39	-2.42	-2.5	0.03	-2.77	-2.47	-1.72	-2.07	-2.58	-2.64	-2.48	-2.75	0.425	0.295	-0.045	-1.765	-2.745	-2.845	-3.075	-2.345	-3.045	-1.64	-1.02	-0.82	-0.48	0.07	-0.03	-3.56	-2.26	-0.75	-0.12	0.01	0.22	-0.43	-0.4	0.51	0.71	0.84	1.4	-0.27823
YOR167C	RPS28A	translation	structural constituent of ribosome	0	-1.69	-1.95	-1.34	-1.85	-2.35	-2.39	-2.42	-2.5	0.03	-2.77	-2.47	-1.72	-2.07	-2.58	-2.64	-2.48	-2.75	0.425	0.295	-0.045	-1.765	-2.745	-2.845	-3.075	-2.345	-3.045	-1.64	-1.02	-0.82	-0.48	0.07	-0.03	-3.56	-2.26	-0.75	-0.12	0.01	0.22	-0.43	-0.4	0.51	0.71	0.84	1.4	-0.27823
YOR203W	YOR203W	biological_process	molecular_function	0	-2.22	-3.29	-1.65	-4.21	-4.35	-4.59	-4.48	-3.85	-0.075	-1.535	-2.065	-1.155	-1.485	-1.695	-1.925	-2.075	-1.055	-0.075	0.115	-0.415	-2.635	-3.755	-4.165	-4.505	-4.425	-4.755	0.59	0.52	-0.35	-0.22	0.04	0.45	-0.81	-0.43	-0.99	-0.63	-0.07	0.9	-3.055	-3.045	-2.845	-2.495	-1.445	-0.505	-0.719796
YOR206W	NOC2	ribosome biogenesis and assembly*	molecular_function	0	-3.25	-2.05	-1.36	-1.95	-1.68	-2.42	-2.5	-2.23	0.025	-6.055	-3.315	-2.575	-2.925	-3.055	-3.315	-3.255	-3.325	0.22	-0.35	-0.75	-1.49	-2.04	-2.45	-2.43	-2.45	-2.48	-1.02	-0.73	-0.49	-0.67	-0.36	-0.21	-1.42	-0.97	-0.52	-0.29	0.08	-0.14	-1.54	-1.23	-1.11	-1.11	-0.99	-0.99	-0.03
YOR224C	RPB8	transcription*	transferase activity*	0	-1.57	-1.55	-1.36	-2.13	-2.24	-2.4	-2.5	-2.4	-0.085	-2.825	-2.455	-2.515	-2.985	-2.985	-2.915	-2.895	-2.725	0.26	0.06	-0.21	-1.52	-2.16	-2.35	-2.25	-2.24	-2.2	-1.11	-0.63	-0.45	-0.32	0.08	0.32	-1.14	-0.6	-0.33	-0.28	0.04	0.26	-0.42	-0.11	0.08	0.39	0.59	1.09	-0.73452
YOR234C	RPL33B	translation	structural constituent of ribosome	0	-1.82	-2.54	-1.77	-1.76	-1.93	-2.23	-2.06	-2.73	-0.225	-4.285	-3.565	-2.335	-1.875	-2.185	-2.175	-2.025	-1.885	0.2	0.02	-0.4	-3.6	-2.96	-2.71	-2.91	-2.73	-2.87	-0.79	-0.55	-0.51	-0.38	-0.06	0.03	-1.6	-1.14	-0.32	0.02	0.1	0.21	-1.5	-1.21	-0.92	-0.53	-0.56	-0.25	-0.323719
YOR271C	YOR271C	biological_process*	molecular_function*	0	-2.4	-1.96	-1.23	-2.68	-2.99	-3.62	-3.9	-3.39	0	-1	-1.51	-1.6	-2.07	-2.19	-2.32	-2.26	-2.49	0.025	-0.255	-0.505	-1.155	-1.845	-2.225	-2.395	-2.325	-2.315	-0.01	-0.27	0.26	0.27	0.14	0.41	-0.43	-0.37	-1.08	-0.74	-0.38	0.32	-1.305	-1.145	-1.095	-1.045	-0.345	-0.125	-0.816205
YOR272W	YTM1	ribosome biogenesis and assembly*	molecular_function	0	-3.98	-2.55	-1.4	-2.05	-1.99	-2.9	-3.46	-3.18	-0.1	-5.09	-3.11	-2.04	-2.6	-2.86	-2.88	-2.93	-2.77	0.09	-0.78	-0.97	-1.47	-1.67	-2.14	-2.37	-2.26	-2.56	-1.02	-1.04	-0.47	-0.39	-0.24	-0.08	-0.97	-0.97	-1.06	-1.12	-0.69	-0.07	-1.4	-1.23	-1.13	-1.23	-0.75	-0.65	0.16
YOR293W	RPS10A	translation	structural constituent of ribosome	0	-2.04	-2.09	-1.37	-1.4	-1.88	-2.07	-3.03	-2.95	-0.01	-4.44	-3.77	-2.24	-2.03	-2.73	-2.81	-2.84	-3.07	0.45	0.27	0.02	-3.2	-3.14	-3.26	-3.44	-3.65	-3.41	-0.85	-0.29	-0.12	-0.26	-0.03	-0.07	-2.53	-1.48	0.22	0.11	0.29	0.03	-0.905	-0.935	-0.215	0.075	-0.065	0.185	-0.357434
YOR293W	RPS10A	translation	structural constituent of ribosome	0	-2.04	-2.09	-1.37	-1.4	-1.88	-2.07	-3.03	-2.95	-0.01	-4.44	-3.77	-2.24	-2.03	-2.73	-2.81	-2.84	-3.07	0.45	0.27	0.02	-3.2	-3.14	-3.26	-3.44	-3.65	-3.41	-0.85	-0.29	-0.12	-0.26	-0.03	-0.07	-2.53	-1.48	0.22	0.11	0.29	0.03	-0.905	-0.935	-0.215	0.075	-0.065	0.185	-0.357434
YOR309C	YOR309C	biological_process	molecular_function	0	-2.76	-2.59	-1.9	-2.28	-2.18	-2.71	-3.27	-2.16	-0.03	-4.64	-3.56	-3.31	-3.27	-3.34	-3.47	-3.68	-3.56	0.33	-0.01	-0.35	-2.14	-2.88	-2.97	-2.94	-3.3	-3.02	-1.09	-1	-0.53	-0.35	0	0.15	-2.11	-1.34	-0.6	-0.42	-0.1	-0.04	-0.985	-0.585	-0.315	-0.265	-0.095	0.285	-0.305973
YOR309C	YOR309C	biological_process	molecular_function	0	-2.76	-2.59	-1.9	-2.28	-2.18	-2.71	-3.27	-2.16	-0.03	-4.64	-3.56	-3.31	-3.27	-3.34	-3.47	-3.68	-3.56	0.33	-0.01	-0.35	-2.14	-2.88	-2.97	-2.94	-3.3	-3.02	-1.09	-1	-0.53	-0.35	0	0.15	-2.11	-1.34	-0.6	-0.42	-0.1	-0.04	-0.985	-0.585	-0.315	-0.265	-0.095	0.285	-0.305973
YOR309C	YOR309C	biological_process	molecular_function	0	-2.76	-2.59	-1.9	-2.28	-2.18	-2.71	-3.27	-2.16	-0.03	-4.64	-3.56	-3.31	-3.27	-3.34	-3.47	-3.68	-3.56	0.33	-0.01	-0.35	-2.14	-2.88	-2.97	-2.94	-3.3	-3.02	-1.09	-1	-0.53	-0.35	0	0.15	-2.11	-1.34	-0.6	-0.42	-0.1	-0.04	-0.985	-0.585	-0.315	-0.265	-0.095	0.285	-0.305973
YOR310C	NOP58	ribosome biogenesis and assembly*	molecular_function	0	-2.94	-2.53	-2.03	-3.03	-2.79	-3.92	-4.17	-3.55	0.04	-5.42	-4.25	-3.71	-4.18	-4.39	-4.44	-4.58	-4.31	0.31	-0.12	-0.5	-2.43	-3.33	-3.54	-3.68	-3.84	-3.73	-1.57	-1.24	-0.72	-0.54	-0.14	0.01	-2.64	-2.28	-1.34	-0.82	-0.33	-0.14	-0.525	-0.005	0.105	0.485	0.675	0.845	-0.164693
YOR340C	RPA43	transcription*	DNA-directed RNA polymerase activity	0	-3.31	-2.33	-1.31	-1.87	-1.98	-2.6	-3.2	-2.2	-0.06	-5.12	-3.26	-2.45	-2.89	-3.2	-3.35	-3.39	-3.52	0.235	-0.265	-0.475	-1.425	-1.905	-2.705	-2.695	-3.075	-2.905	-0.9	-0.73	-0.5	-0.58	-0.16	0.06	-1.99	-1.81	-0.99	-0.32	-0.11	-0.01	-0.2	-0.28	-0.08	-0.23	0.27	0.36	0.0463938
YOR342C	YOR342C	biological_process	molecular_function	0	-1.28	-1.13	-0.62	-1.56	-1.5	-1.58	-1.52	-1.26	0.075	-2.535	-1.735	-1.875	-2.225	-2.085	-2.005	-1.995	-1.985	0.175	-0.205	-0.565	-1.745	-2.245	-2.375	-2.475	-2.625	-2.225	-0.94	-0.86	0.09	0.11	0.08	-0.11	-1.84	-1.4	-0.93	-0.66	-0.52	-0.48	-1.73	-1.48	-0.99	-0.77	-0.73	-0.74	-0.583105
YOR375C	GDH1	amino acid metabolic process*	oxidoreductase activity*	0	-2.72	-1.72	-0.74	-2.82	-2.28	-4.11	-4.38	-3.03	0.74	-2.49	-3.91	-4.36	-4.84	-4.8	-4.79	-4.77	-3.95	0.23	0.13	-0.13	-1.48	-3.67	-4.3	-4.89	-5.27	-4.41	-0.96	-0.9	-0.06	-0.16	0.06	0.17	0.23	0.06	-0.16	0.27	0.53	0.87	0.875	1.135	1.125	0.965	1.275	1.405	-1.07793
YPL079W	RPL21B	translation	structural constituent of ribosome	0	-1.76	-1.87	-1.31	-2.19	-2.3	-2.76	-3.57	-3.7	0.025	-4.305	-3.015	-1.795	-1.895	-2.205	-2.215	-2.325	-2.445	0.12	0.07	-0.19	-3.57	-3.16	-3.1	-2.91	-3.43	-2.83	-0.68	-0.11	-0.09	-0.28	-0.09	0.05	-1.79	-2.08	-0.28	-0.32	0.1	0	-1.14	-1.01	-0.71	-0.34	-0.42	-0.42	-0.389259
YPL090C	RPS6A	translation*	structural constituent of ribosome	0	-1.47	-1.7	-1.04	-1.37	-1.52	-1.98	-2.8	-3.36	-0.295	-3.935	-3.915	-2.045	-1.955	-2.215	-2.225	-2.145	-2.245	-0.145	-0.435	-0.065	-3.765	-3.085	-3.155	-2.775	-2.555	-2.705	0.09	0.17	0.23	-0.04	0.03	0.04	-1.3	-1.12	0.03	0.27	0.21	-0.15	-0.06	0.15	0.32	0.28	0.39	0.13	-0.374405
YPL131W	RPL5	translation*	RNA binding*	0	-1.25	-1.63	-0.81	-1.18	-1.29	-1.85	-2.59	-3.1	-0.25	-3.45	-4.28	-2.11	-2.57	-3.29	-3.37	-3.29	-3.42	-0.275	-0.765	-0.415	-4.515	-4.205	-4.325	-4.165	-4.015	-3.985	-0.34	-0.52	-0.14	-0.15	-0.05	0.17	-0.97	-0.63	-0.68	-0.64	-0.41	0.2	-0.255	-0.125	-0.025	-0.015	0.335	0.165	-0.390317
YPL143W	RPL33A	translation	structural constituent of ribosome	0	-1.66	-2.17	-1.55	-1.72	-1.95	-2.24	-2.54	-3.07	-0.095	-3.485	-3.285	-1.945	-1.565	-1.685	-1.525	-1.305	-0.865	0.125	0.135	-0.175	-3.375	-2.995	-2.555	-2.545	-2.185	-2.145	-0.53	-0.41	-0.28	-0.12	0.09	0.11	-1.27	-0.74	0.04	0.14	0.19	0.33	-1.38	-1.07	-0.85	-0.53	-0.56	-0.33	-0.373916
YPL183C	YPL183C	biological_process	molecular_function	0	-2.37	-1.94	-1.51	-1.72	-1.81	-2.34	-2.74	-2.19	-0.185	-4.045	-3.025	-2.365	-2.795	-2.385	-2.055	-1.975	-1.595	0.045	-0.475	-0.815	-1.855	-2.095	-2.575	-2.725	-2.735	-2.725	-0.65	-0.4	-0.16	-0.12	0.04	0.1	-1.32	-0.84	-0.24	-0.07	0.01	0.18	-1.34	-1.12	-1.01	-0.91	-0.67	-0.19	-0.04
YPL220W	RPL1A	translation	structural constituent of ribosome	0	-1.66	-1.66	-1.15	-1.39	-1.69	-2.22	-2.5	-3.36	-0.27	-3.61	-3.62	-2.44	-2.99	-3.25	-3.27	-3.41	-3.37	-0.145	-0.155	-0.255	-3.365	-3.585	-3.695	-3.575	-3.305	-3.375	-0.2	-0.13	0.04	0.01	0.06	0.11	-1.24	-0.41	0.27	0.22	0.03	0.08	-1.525	-1.185	-1.075	-0.815	-0.735	-0.755	-0.48
YPL227C	ALG5	protein amino acid N-linked glycosylation	transferase activity*	0	-1.62	-1.36	-1.37	-2.58	-2.43	-2.88	-3.11	-3.19	-0.355	-0.825	-1.255	-2.315	-2.705	-2.285	-2.245	-2.135	-2.235	-0.345	-0.545	-0.445	-1.035	-2.225	-2.295	-2.265	-2.345	-2.595	-1.1	-0.69	-0.67	-0.71	-0.42	-0.19	-1.67	-1.32	-0.3	-0.03	0.22	-0.08	-0.275	-0.245	0.125	0.305	0.215	0.175	-1.12
YPL246C	RBD2	biological_process	molecular_function*	0	-0.58	-0.68	-0.62	-1.84	-2.65	-3.24	-4.08	-3.55	-0.245	-0.975	-0.565	-0.995	-2.395	-2.845	-2.605	-2.465	-2.825	-0.425	-0.675	-0.785	-0.665	-2.055	-2.995	-2.995	-3.085	-3.065	-0.73	-0.62	-0.38	0	-0.16	-0.31	-0.42	0.14	-0.26	-0.1	-0.27	-0.08	-1.4	-1.13	-0.99	-0.58	-0.85	-0.61	-0.281465
YPL249C-A	RPL36B	translation	RNA binding*	0	-1.38	-1.43	-0.96	-0.81	-1.15	-1.58	-1.92	-2.44	0.15	-3.32	-2.71	-1.35	-1.21	-1.61	-1.65	-1.68	-1.66	0.24	-0.03	-0.22	-3.13	-3.07	-3	-3.09	-3.14	-2.8	-1.14	-0.39	-0.52	-0.51	-0.28	-0.19	-1.84	-2.03	-0.91	-0.59	0.04	-0.27	-1.775	-1.225	-0.655	-0.445	-0.305	-0.465	-0.385233
YPL263C	KEL3	biological_process	molecular_function	0	-2.07	-1.46	-1.21	-2.58	-2.71	-3	-2.95	-2.62	-0.06	-4.08	-2.83	-2.51	-2.42	-2.06	-1.82	-1.64	-1.55	0.115	-0.255	-0.505	-1.705	-2.475	-2.295	-2.215	-1.985	-2.205	-0.84	-0.6	-0.36	-0.14	-0.07	-0.04	-0.75	-0.51	-0.91	-0.73	-0.42	-0.14	-0.95	-0.51	-0.4	-0.53	-0.21	-0.19	-0.74
YPL273W	SAM4	amino acid biosynthetic process*	transferase activity*	0	-1.98	-1.84	-1.1	-2.64	-3.29	-4.08	-4.65	-5.08	-0.105	-2.255	-2.405	-2.345	-3.615	-3.855	-3.765	-3.935	-3.625	-0.185	-0.405	-0.785	-2.075	-3.075	-4.045	-4.315	-4.775	-4.945	-0.02	0.51	-0.5	-0.58	-0.31	-0.21	-2.44	-1.78	-0.88	-0.69	-0.31	-0.13	-2.765	-2.505	-1.885	-1.695	-1.385	-1.515	-0.37
YPR043W	RPL43A	translation	metal ion binding*	0	-1.64	-1.86	-1.27	-1.77	-1.84	-2.15	-3.33	-2.96	0.045	-3.775	-3.255	-1.885	-1.905	-2.305	-2.165	-2.245	-2.255	0.18	0.23	-0.01	-3.5	-3.17	-3.12	-2.9	-3.4	-2.64	-0.48	0.11	-0.14	-0.33	-0.13	-0.1	-1.42	-1.47	0.28	0.14	0.43	0.05	-0.84	-0.76	-0.27	0.01	-0.17	0.15	-0.210864
YPR043W	RPL43A	translation	metal ion binding*	0	-1.64	-1.86	-1.27	-1.77	-1.84	-2.15	-3.33	-2.96	0.045	-3.775	-3.255	-1.885	-1.905	-2.305	-2.165	-2.245	-2.255	0.18	0.23	-0.01	-3.5	-3.17	-3.12	-2.9	-3.4	-2.64	-0.48	0.11	-0.14	-0.33	-0.13	-0.1	-1.42	-1.47	0.28	0.14	0.43	0.05	-0.84	-0.76	-0.27	0.01	-0.17	0.15	-0.210864
YPR060C	ARO7	amino acid biosynthetic process*	catalytic activity*	0	-1.58	-2.09	-2.01	-3.5	-3.85	-3.92	-3.61	-2.47	0.08	0.25	-1.04	-1.96	-2.74	-2.73	-2.67	-2.69	-2.43	0.18	0.06	-0.14	-1.71	-3.63	-3.69	-3.26	-2.76	-2.99	-1.09	-0.94	-0.9	-0.64	-0.31	0.02	-0.61	0.1	0.56	0.62	0.69	0.67	-1.295	-0.745	-0.715	-0.355	-0.075	0.155	-1.19426
YPR102C	RPL11A	translation*	RNA binding*	0	-1.93	-2.33	-1.65	-1.99	-2.36	-2.87	-3.95	-3.68	-0.015	-3.335	-3.595	-2.525	-2.495	-2.865	-2.845	-2.965	-3.125	0.185	-0.075	-0.455	-3.555	-3.675	-3.555	-3.655	-3.525	-3.855	-1.19	-0.65	-0.6	-0.49	-0.27	-0.34	-2.81	-2.6	-0.8	-0.47	-0.19	-0.38	-1.325	-1.285	-0.565	-0.365	-0.085	0.115	-0.27
YPR167C	MET16	metabolic process*	transferase activity*	0	-0.77	-1.42	-2.28	-2.51	-3.02	-3.84	-4.21	-4.55	-0.005	-0.385	-1.615	-1.935	-1.435	-1.135	-0.985	-0.785	1.155	-0.025	0.215	-0.405	-1.785	-3.345	-3.305	-3.245	-3.485	-3.465	-0.53	-0.28	-0.9	-0.89	-0.29	0.01	-1.08	-1.08	-0.11	0.06	0.33	0.09	-1.785	-1.695	-1.575	-1.305	-0.915	-0.735	-0.642144
YAL020C	ATS1	tRNA modification*	molecular_function	0	-0.15	-0.15	-0.04	1.07	1.13	1.39	1.16	1.17	-0.07	-0.34	0.03	0.28	0.52	0.48	0.54	0.65	0.7	0.14	0.16	-0.09	-0.33	0.45	0.45	0.34	0.25	0.24	0.21	0.41	0.19	0.32	0.08	0.07	1.27	0.76	-0.79	-0.6	-0.49	0.17	-1.58	-1.3	-1.28	-1	-0.57	-0.33	-0.329612
YAL038W	CDC19	glycolysis*	transferase activity*	0	-0.17	-0.18	-1.32	1.29	1.27	1.31	0.67	-0.97	-0.065	-0.755	-0.495	0.095	0.405	0.065	-0.235	-0.215	-0.435	-0.21	-0.83	-0.02	0.03	0.2	0.33	0.59	0.5	0.44	-0.47	-1.57	-0.7	-0.61	-0.25	0.5	1.65	1.44	-0.19	0.2	0.2	1.01	1.875	1.785	1.365	0.975	1.495	1.315	1.5043
YAL039C	CYC3	cytochrome c-heme linkage	metal ion binding*	0	2.11	2.4	0.88	0.82	1.04	0.8	1.02	1.5	-0.045	0.425	0.335	0.255	0.335	0.415	0.405	0.495	0.585	0.06	0.13	0.22	0.27	0.03	-0.25	-0.54	-0.58	-0.25	-0.91	-0.74	-0.12	0.19	0.08	-0.16	0.71	0.14	-1.42	-1.08	-0.62	-0.13	-1.09	-0.97	-0.66	-0.69	-0.05	-0.16	-1.60303
YAL053W	FLC2	transport*	FAD transmembrane transporter activity	0	-0.33	-0.12	-0.09	0.03	0.62	0.63	1.05	1.18	-0.33	-0.03	0.11	-0.22	0.1	0.6	0.98	1.05	1.29	-0.69	-0.84	-0.63	-0.58	-0.47	0.28	0.44	0.55	0.74	0.48	0.34	0.58	0.5	0.18	0.06	1.24	0.75	-0.14	-0.1	-0.26	0.17	-1.22	-1.35	-1.54	-1.28	-1.16	-1.03	-0.00065631
YAR014C	BUD14	regulation of transcription, DNA-dependent*	protein phosphatase type 1 regulator activity	0	-0.93	-0.76	-0.52	-0.37	-0.27	-0.13	-0.15	-0.35	-0.015	-0.875	-0.585	-0.715	-0.595	-0.565	-0.525	-0.535	-0.445	0.19	0.09	-0.1	-0.54	-0.46	-0.28	-0.19	-0.3	-0.27	-0.12	-0.04	-0.15	-0.1	-0.03	-0.01	0.16	-0.12	-0.54	-0.43	-0.24	-0.19	-0.035	0.065	0.105	0.145	0.185	0.145	-0.387269
YBL008W	HIR1	transcription*	transcription corepressor activity	0	-0.69	-0.62	-0.69	-0.39	-0.05	0.13	0.41	0.57	-0.085	-0.175	-0.375	-0.255	0.235	0.485	0.405	0.365	0.405	0.135	-0.115	0.035	-0.395	-0.215	0.005	0.095	0.325	0.255	0.01	-0.13	-0.22	-0.22	-0.01	0.18	0.49	0.2	0.11	-0.12	-0.16	-0.02	0.09	0.12	-0.1	-0.15	-0.03	0.12	-0.632983
YBL016W	FUS3	cell cycle*	nucleotide binding*	0	-0.31	-0.18	-0.14	-0.15	-0.31	-0.79	-0.8	-0.51	-0.055	-0.655	-0.205	-0.145	-0.485	-0.475	-0.455	-0.405	-0.345	0.155	0.005	-0.225	0.125	-0.115	-0.525	-0.685	-0.755	-0.765	-0.01	0.12	0.28	0.18	0.12	0.3	-0.19	-0.25	-0.63	-0.64	-0.24	0.27	0.145	0.205	-0.315	-0.465	-0.385	-0.375	-1.04
YBL023C	MCM2	transcription*	nucleotide binding*	0	-0.32	-0.27	-0.23	-0.39	-0.4	-0.7	-1.12	-1.24	0.23	0.5	0.19	-0.2	-0.04	0.49	0.54	0.63	0.71	0.38	0.44	0.36	0.18	0.32	1.22	1.43	1.53	1.44	-0.04	0.03	-0.14	-0.06	0.01	0.03	0.99	0.76	0.44	0.35	0.06	0.19	0.34	0.51	0.26	0.19	0.21	0.28	0.157377
YBL026W	LSM2	rRNA processing*	RNA binding*	0	0.04	-0.01	-0.24	-0.14	-0.34	-0.09	0.02	0.01	0.105	1.855	1.555	1.325	0.055	-0.195	-0.265	-0.075	-0.055	0.52	0.54	0.42	-0.06	-0.89	-0.7	-0.7	-0.87	-0.59	-0.09	0.83	0.39	0.05	0.48	0.42	-0.92	-0.83	0.79	0.91	0.86	0.56	-0.46	-0.67	-0.49	0.06	-0.35	0.09	-0.238194
YBL026W	LSM2	rRNA processing*	RNA binding*	0	0.04	-0.01	-0.24	-0.14	-0.34	-0.09	0.02	0.01	0.105	1.855	1.555	1.325	0.055	-0.195	-0.265	-0.075	-0.055	0.52	0.54	0.42	-0.06	-0.89	-0.7	-0.7	-0.87	-0.59	-0.09	0.83	0.39	0.05	0.48	0.42	-0.92	-0.83	0.79	0.91	0.86	0.56	-0.46	-0.67	-0.49	0.06	-0.35	0.09	-0.238194
YBL026W	LSM2	rRNA processing*	RNA binding*	0	0.04	-0.01	-0.24	-0.14	-0.34	-0.09	0.02	0.01	0.105	1.855	1.555	1.325	0.055	-0.195	-0.265	-0.075	-0.055	0.52	0.54	0.42	-0.06	-0.89	-0.7	-0.7	-0.87	-0.59	-0.09	0.83	0.39	0.05	0.48	0.42	-0.92	-0.83	0.79	0.91	0.86	0.56	-0.46	-0.67	-0.49	0.06	-0.35	0.09	-0.238194
YBL036C	YBL036C	amino acid metabolic process	pyridoxal phosphate binding*	0	-0.84	-0.67	-0.58	-0.59	-0.39	-0.2	-0.32	-0.09	-0.035	-0.435	-0.425	-0.465	-0.835	-0.625	-0.675	-0.565	-0.825	0.06	-0.02	-0.15	-0.16	-0.52	-0.49	-0.44	-0.48	-0.42	-0.11	-0.18	-0.34	-0.15	-0.11	-0.17	-0.57	-0.39	0.4	0.18	0.2	-0.04	0.465	0.325	0.505	0.395	0.475	0.515	0.068319
YBL054W	YBL054W	ribosome biogenesis and assembly	molecular_function*	0	-3.7	-2.24	-1.04	-0.02	0.65	0.43	0.34	0.74	0.06	-4.14	-2.46	-0.83	-0.39	0.35	0.47	0.65	0.85	0.27	-1.04	-0.99	-0.95	-0.02	0.79	0.89	1.18	1.27	0.3	-0.21	0.18	0.04	0.07	0.09	0.4	0.29	-0.43	-0.64	-0.37	0.05	0.29	-0.33	-0.75	-0.9	-0.75	-0.51	0.22
YBL093C	ROX3	transcription*	RNA polymerase II transcription mediator activity	0	-0.51	-0.5	-0.64	0.69	0.85	1.01	1.06	1.21	0.095	0.485	0.565	0.795	0.525	0.645	0.565	0.765	0.705	-0.3	-0.35	-0.21	0.05	0.17	0.12	0.01	-0.24	-0.03	-0.46	-0.13	-0.37	-0.47	-0.42	-0.12	-0.75	-0.37	0.12	0.13	0.29	-0.08	-0.53	-0.66	-0.58	-0.9	-0.67	-0.91	0.164351
YBL103C	RTG3	transcription*	DNA binding*	0	-0.3	-0.36	0.12	0.24	0.28	0.56	0.58	0.68	0.05	-0.13	-0.14	0.22	0.46	0.5	0.49	0.45	0.9	0.14	0.08	-0.07	0.04	0.58	0.62	0.7	0.68	0.66	0.52	0.59	0.17	0.02	-0.21	-0.2	0.33	0.14	0.08	-0.08	0.02	-0.31	1.11	0.94	0.67	0.64	0.55	0.45	0.567468
YBR025C	OLA1	ATP catabolic process	nucleotide binding*	0	-1.03	-0.96	-1.21	0.17	0.03	-0.15	-0.48	-1.14	0.105	-2.645	-2.415	-0.655	-0.035	-0.015	-0.155	-0.235	-0.565	0.195	0.105	-0.015	-1.045	-0.315	-0.505	-0.465	-0.695	-1.155	-0.8	-1.14	-0.89	-0.37	-0.17	0	-0.94	-0.95	-0.56	-0.39	-0.12	0.25	-0.48	-0.56	-0.57	-0.6	-0.2	-0.03	0.597937
YBR055C	PRP6	mRNA processing*	binding*	0	-0.57	-0.52	-0.63	-0.41	-0.29	-0.39	-0.22	-0.13	-0.175	-1.235	-0.855	-0.595	-0.465	-0.405	-0.325	-0.445	-0.425	-0.02	-0.2	-0.39	-0.69	-0.5	-0.45	-0.65	-0.49	-0.32	-0.48	-0.16	-0.17	-0.2	-0.23	-0.28	-0.49	-0.86	-0.57	-0.51	-0.17	-0.29	-0.21	-0.39	-0.44	-0.47	-0.61	-0.61	0.15
YBR060C	ORC2	DNA replication*	chromatin binding*	0	-0.53	-0.47	-0.32	-0.28	-0.28	-0.51	-0.61	-0.87	0.13	-1.02	-0.77	-0.91	-0.47	-0.34	-0.37	-0.4	-0.49	0.3	0.2	0.17	-0.61	-0.37	-0.34	-0.32	-0.46	-0.4	-0.62	-0.47	-0.25	-0.32	0.01	0.04	-0.68	-0.61	-0.46	-0.53	-0.14	0.05	-0.115	-0.125	-0.115	-0.075	0.025	0.265	-0.238518
YBR065C	ECM2	mRNA processing*	molecular_function*	0	-0.68	-0.89	-0.91	-0.02	0.6	0.87	0.96	1.7	-0.425	-0.485	-0.255	-0.065	0.295	0.295	0.385	0.235	0.535	-0.11	-0.48	-0.67	-0.29	0.68	0.83	1.04	0.47	1.01	-0.21	0.24	-0.05	-0.31	-0.12	0.03	0.32	0.07	0.47	0.28	0.4	-0.16	0.94	0.38	0.53	0.23	0.44	-0.06	0.668969
YBR080C	SEC18	transport*	nucleotide binding*	0	0.42	0.1	-0.16	-0.64	-0.77	-1.13	-1.15	-1.72	0.175	1.185	0.375	0.105	-0.175	-0.255	-0.365	-0.355	-0.595	0.03	0.19	0.34	0.22	0.05	-0.1	-0.13	-0.11	-0.28	-0.18	-0.2	0.03	0.19	0.02	0.04	0.8	0.62	0.18	-0.04	-0.19	0.18	-0.705	-0.485	-0.645	-0.685	-0.615	-0.675	-0.225916
YBR153W	RIB7	riboflavin biosynthetic process	oxidoreductase activity*	0	0.04	0.18	-0.22	-0.2	-0.17	-0.2	0.07	0.09	-0.015	-0.165	-0.245	0.025	0.165	0.155	0.125	0.225	0.275	0.22	0.12	0.12	-0.02	0.22	0.33	0.22	0.34	0.25	-0.02	0.2	-0.04	0.05	0.21	0.15	-0.13	0.25	0.34	0.25	0.12	0.2	0.065	0.105	0.175	0.155	0.235	0.285	-1.14467
YBR160W	CDC28	transcription*	nucleotide binding*	0	0.22	0.21	0.29	-0.18	-0.28	-0.32	-0.06	-0.05	0.04	0.15	0.09	-0.24	-0.3	-0.27	-0.23	-0.16	-0.22	-0.07	-0.07	0.08	-0.23	-0.92	-1.26	-1.25	-1.35	-1.26	-0.3	-0.3	-0.15	-0.1	0.21	0.16	-0.28	-0.26	-0.24	-0.06	0.02	0.21	-0.09	0.02	-0.01	-0.02	0.14	0.45	-0.932505
YBR195C	MSI1	DNA repair*	transcription regulator activity	0	-0.45	-0.31	-0.35	0.01	0.13	0.26	0.39	0.19	0.1	-0.09	0.37	0.65	0.58	0.61	0.61	0.61	0.42	0.225	-0.055	0.125	0.345	0.385	0.545	0.645	0.625	0.565	-0.43	-0.41	-0.01	-0.23	-0.08	-0.07	0.47	0.27	-0.46	-0.2	-0.18	0.21	0.57	0.69	0.64	0.44	0.83	0.53	-0.433001
YBR197C	YBR197C	biological_process	molecular_function	0	-0.64	-0.28	-0.23	0.65	0.93	1.61	1.89	1.75	0.11	-0.19	-0.19	0.59	0.56	0.72	0.8	0.9	0.89	0.225	-0.135	-0.215	-0.085	0.035	-0.055	0.115	0.215	0.175	-0.35	-0.3	-0.27	-0.14	-0.36	-0.19	-0.17	-0.07	-0.02	-0.38	-0.11	-0.19	-1.495	-1.195	-0.725	-0.835	-0.355	-0.415	0.329795
YBR202W	MCM7	transcription*	nucleotide binding*	0	-0.21	0.03	0.17	0.34	-0.01	-0.12	-0.32	-1.11	0.18	0.25	0.39	0.14	-0.07	-0.29	-0.44	-0.47	-0.71	0.31	0.49	0.32	-0.02	-1	-0.94	-0.97	-1.23	-1.1	0.03	-0.05	0.09	0.2	0.22	0.13	0.88	0.61	0	0.1	-0.07	0.43	-0.095	-0.175	-0.195	-0.175	-0.065	-0.275	0.029659
YBR211C	AME1	cell cycle*	molecular_function	0	0.29	-0.07	-0.12	0.12	0.16	0.45	0.45	1.15	0.05	0.56	0.39	0.07	0.05	-0.13	-0.13	0.04	0.43	0.14	0.23	-0.03	0.19	-0.04	-0.04	0.01	-0.15	0.18	-0.11	0.17	0.06	-0.03	0	-0.04	-0.34	-0.1	0.6	0.76	0.58	0.17	0.805	0.625	0.695	0.745	0.665	0.685	-0.702273
YBR227C	MCX1	biological_process*	nucleotide binding*	0	-0.9	-0.82	-0.67	-0.84	-0.86	-1.06	-1.22	-1.52	0.01	1.13	-0.08	-0.32	-0.56	-0.48	-0.54	-0.57	-0.73	-0.115	-0.235	-0.215	-0.195	-0.225	-0.275	-0.285	-0.195	-0.305	0	-0.14	0.13	-0.06	-0.12	0.26	0.85	0.85	0.72	0.61	0.73	0.59	-0.445	-0.465	-0.475	-0.895	-0.235	-0.475	0.0745347
YBR239C	YBR239C	biological_process*	molecular_function*	0	-0.51	-0.49	-0.47	-0.47	-0.5	-0.48	-0.15	-0.21	-0.005	-0.305	-0.765	-0.625	-0.475	-0.215	-0.255	-0.205	-0.015	0.24	0.02	-0.22	-0.5	-0.12	-0.02	-0.08	-0.08	-0.15	-0.16	-0.13	-0.3	-0.22	-0.19	-0.15	0	0	0.15	0.13	-0.15	0.06	-0.095	-0.225	-0.125	-0.045	0.025	0.215	-0.69
YBR242W	YBR242W	biological_process	molecular_function*	0	-1.49	-0.93	-0.4	0.59	0.63	0.91	0.69	0.99	0.07	-0.89	-0.45	-0.18	0.36	0.11	0.05	0.14	-0.11	0.47	0.1	-0.15	0.04	0.43	0.49	0.25	0.08	1.11e-16	-0.29	0.03	-0.64	-0.64	-0.21	0.06	-0.87	-0.55	0.06	0.22	0.16	-0.06	0.365	0.255	0.175	0.055	0.005	0.225	-0.05
YBR244W	GPX2	response to oxidative stress	oxidoreductase activity*	0	-0.85	-0.9	-0.99	-0.52	-0.48	-0.11	-0.01	0.65	-0.24	0.17	-0.15	-0.18	-0.03	-0.04	-0.12	-0.07	-2.78e-17	0.14	0.27	0.51	0.81	0.25	0.4	0.29	0.26	0.44	-0.1	0.2	-0.11	-0.41	-0.3	0.21	-1.43	-1.05	0.46	0.45	0.5	0.4	0.01	-0.31	-0.05	-0.04	-0.04	0.36	0.31
YBR245C	ISW1	transcription*	nucleotide binding*	0	-0.71	-0.56	-0.46	-0.44	-0.33	-0.41	-0.58	-0.44	0.015	-0.045	0.005	-0.295	0.035	0.145	0.135	0.085	-0.035	0.115	0.285	0.395	0.025	-0.105	-0.025	0.145	0.155	0.345	-0.2	-0.33	-0.31	-0.11	0	0.08	0.46	0.32	0.19	0.21	0.19	0.13	0.72	0.74	0.76	0.69	0.67	0.78	-0.217515
YBR281C	DUG2	proteolysis*	hydrolase activity*	0	0.3	-0.03	-0.68	-0.36	-0.32	-0.5	-0.56	-0.99	0.215	0.295	-0.475	-0.645	-0.345	-0.185	-0.215	-0.165	-0.225	0.255	0.375	0.085	-0.885	-1.075	-0.825	-0.745	-0.485	-0.665	-0.47	-0.58	-0.53	-0.29	-0.09	0.08	-0.08	-0.02	0.07	0.3	0.28	0.2	0.31	0.42	0.53	0.62	0.63	0.92	-0.403493
YCL011C	GBP2	telomere maintenance*	nucleotide binding*	0	-0.49	-0.43	-0.55	0.18	0.33	0.44	0.3	0.23	0.03	-0.76	-0.72	-0.3	0.07	0.08	0.1	0.17	0.21	0.13	-0.06	-0.2	-0.51	0.16	0.24	0.26	0.42	0.26	-0.23	-0.17	-0.2	-0.06	-0.03	0.01	0.55	0.3	-0.28	-0.41	-0.04	-0.15	-0.165	-0.035	0.115	-0.065	0.235	0.045	-0.27
YCL016C	DCC1	telomere maintenance*	molecular_function	0	0.05	0.01	-0.07	0.1	0.04	0.03	0.32	0.45	-0.065	-0.175	-0.315	-0.355	-0.295	-0.255	-0.195	-0.055	0.035	0.07	-0.12	-0.1	-0.32	-0.27	-0.05	0.08	0.16	0.03	0.07	0.11	0.12	0.28	0.1	0.05	-0.16	-0.16	-0.52	-0.32	-0.22	-0.21	-0.085	-0.105	-0.285	-0.385	-0.175	-0.055	0.126678
YCL031C	RRP7	rRNA processing*	molecular_function	0	-0.6	-0.82	-0.87	-0.29	-0.11	0.17	-0.02	0.05	0.03	-1.54	-1.24	-0.97	-0.97	-0.89	-1.06	-0.99	-1.2	0.275	0.155	-0.105	-0.725	-0.595	-0.525	-0.525	-0.435	-0.435	-0.56	-0.73	-0.35	-0.23	-0.11	0.01	-1.01	-0.73	-0.22	0.09	0.08	-0.14	0.445	0.385	0.685	0.605	0.665	0.575	-0.25
YCR008W	SAT4	protein amino acid phosphorylation*	nucleotide binding*	0	-0.5	-0.48	-0.58	-0.63	0.34	0.51	1.37	2.6	-0.15	-1.13	-0.8	-0.74	-0.8	-0.99	-1.04	-1.08	-0.92	0.115	-0.025	-0.095	-0.065	0.125	0.005	0.125	0.015	-0.025	-0.93	-0.6	-0.59	-0.36	-0.36	-0.49	-0.56	-0.98	-0.76	-1.21	-0.7	-0.47	-0.11	-0.24	-0.04	0.11	-0.02	0.27	-0.545693
YCR020C-A	MAK31	telomere maintenance*	peptide alpha-N-acetyltransferase activity	0	-0.73	-0.29	-0.04	-0.27	-0.45	-0.35	-0.89	-0.37	-0.17	-0.24	-0.73	-1.28	-0.9	-0.83	-0.77	-0.95	0.41	0.245	0.085	-0.205	0.185	-0.635	-0.535	-0.895	-0.945	-0.635	-0.3	0.41	-0.07	-0.15	0.22	-0.06	-1.67	-1.78	-0.12	0.16	0.5	0.41	0.645	0.895	1.175	1.415	0.745	1.135	0.99893
YCR026C	NPP1	metabolic process*	hydrolase activity*	0	-0.24	0	-0.06	0.4	0.39	0.43	0.35	-0.03	-0.235	0.045	0.145	0.085	0.255	0.195	0.185	0.155	-0.025	-0.34	-0.4	-0.36	-0.19	0.12	0.12	0.09	0.18	0.11	-0.3	-0.32	-0.27	-0.23	-0.35	-0.29	0.63	0.24	-0.43	-0.39	-0.26	-0.32	-0.04	0.1	0.04	-0.09	-0.11	-0.14	0.04
YCR027C	RHB1	small GTPase mediated signal transduction*	nucleotide binding*	0	-0.09	-0.33	-0.53	-0.72	-0.45	-0.16	-0.14	0.21	0.055	0.545	-0.365	-0.495	-0.675	-0.645	-0.665	-0.725	-0.625	0.095	0.095	-0.175	-0.845	-1.045	-1.295	-1.285	-1.085	-1.445	-0.39	-0.16	-0.16	-0.02	0.13	0.33	-0.93	-0.38	0.16	0.2	0.17	0.39	0.15	0.23	0.41	0.57	0.66	1	-0.44
YCR035C	RRP43	rRNA processing*	hydrolase activity*	0	-0.95	-0.86	-0.82	-1.13	-1.01	-0.92	-1	-1.05	0.04	-0.86	-0.77	-0.61	-0.93	-0.9	-0.88	-0.89	-0.62	0.19	-0.07	-0.13	-0.12	-0.23	-0.33	-0.21	-0.01	-0.21	0	-0.02	-0.41	-0.39	-0.31	-0.18	0.07	0.11	0.06	0.14	-0.15	-0.35	0.26	0.27	0.24	-0.02	0.24	0.23	-0.48
YCR037C	PHO87	transport*	inorganic phosphate transmembrane transporter activity*	0	-0.38	-0.25	-0.22	0.02	-0.05	-0.23	-0.13	-0.44	-0.255	-1.065	-0.745	-0.815	-0.755	-0.735	-0.785	-0.835	-1.085	-0.58	-0.61	-0.71	-0.16	0.21	-0.14	-0.36	-0.42	-0.35	-0.36	-0.33	-0.32	-0.21	-0.09	-0.18	-0.56	-0.4	-0.52	-0.68	-0.33	-0.29	-0.225	-0.295	-0.675	-0.745	-0.935	-0.705	-0.06
YCR047C	BUD23	metabolic process*	transferase activity*	0	-2.53	-1.62	-0.64	-0.28	0.02	0	0.1	0.77	-0.13	-2.87	-1.37	-0.73	-0.18	0.2	0.3	0.21	0.38	0.11	-0.45	-0.63	-0.77	0.02	0.06	-0.17	0.07	-0.12	0.12	0.01	0.31	0.13	-0.03	0.18	1.59	1.23	-0.63	-0.6	-0.34	0.34	-1.95	-1.53	-1.62	-1.63	-1.25	-1.03	-0.12
YCR054C	CTR86	biological_process*	molecular_function	0	-0.83	-0.5	-0.23	-0.58	-0.86	-1.28	-1.45	-2.05	0.225	-0.755	-0.105	0.145	-0.005	0.095	0.085	-0.005	-0.015	0.35	-0.3	-0.36	0.14	0.03	-0.45	-0.36	-0.39	-0.33	0.03	-0.05	-0.25	-0.38	-0.05	-0.12	-0.54	-0.48	-0.08	0.15	0.04	0.08	-0.3	-0.31	-0.21	-0.18	-0.24	-0.27	0.446452
YCR059C	YIH1	regulation of amino acid metabolic process	molecular_function	0	-1.4	-0.72	-0.41	-0.57	-0.39	-0.49	-0.42	-0.38	-0.15	-1.71	-1.24	-0.97	-1.08	-0.74	-0.43	-0.38	-0.35	-0.015	-0.145	-0.285	-0.485	-0.545	-0.705	-0.705	-0.475	-0.745	0.03	0.16	-0.09	-0.2	-0.21	0.08	0.51	0.26	-1.31	-1.31	-0.93	-0.17	-1.845	-1.405	-1.485	-1.395	-0.805	-0.705	-0.770299
YDL039C	PRM7	response to drug*	molecular_function	0	0.09	-0.32	-0.27	-0.02	-0.19	-0.03	-0.88	0.56	-0.06	-0.08	-0.05	-0.11	0.14	-0.18	-0.29	-0.59	-0.83	0.17	0.04	0.05	-0.2	-0.32	-0.42	-0.44	-0.83	-0.72	-0.78	-1.09	-0.65	-0.09	0.01	-0.07	-1.02	-0.74	-0.88	-0.34	-0.31	0.1	-0.135	-0.035	-0.075	0.445	0.375	0.475	-0.197921
YDL042C	SIR2	transcription*	hydrolase activity*	0	-0.79	-0.62	-0.32	0.01	0.03	0.05	0.28	-0.24	0.175	-0.285	-0.215	0.025	0.415	0.385	0.335	0.235	0.135	0.45	0.21	0.12	-0.27	0.01	0.1	0.14	0.05	0.3	-0.24	-0.41	0.15	0.14	0.28	0.3	0.31	0.05	-0.54	-0.09	0.07	0.51	-0.91	-0.79	-0.76	-0.75	-0.61	-0.23	0.09
YDL043C	PRP11	mRNA processing*	metal ion binding*	0	-0.26	-0.26	-0.44	0.22	0.19	0.28	0.45	-0.18	-0.015	-1.035	-0.835	-0.325	-0.205	-0.265	-0.385	-0.415	-0.745	0.27	-0.18	-0.34	-0.49	-0.23	-0.17	-0.15	0.02	-0.19	-0.13	-0.35	-0.35	-0.21	-0.44	-0.01	-0.49	-0.32	0.55	0.71	0.35	-0.07	-0.68	-0.86	-0.59	-0.63	-0.51	-0.82	0.58
YDL073W	YDL073W	biological_process	molecular_function	0	-0.9	-0.69	-0.49	-0.47	-0.57	-0.82	-1.19	-1.22	-0.075	-0.495	-0.455	-0.395	-0.165	-0.135	-0.155	-0.205	-0.005	0.055	-0.075	-0.285	-0.485	-0.145	-0.045	0.085	0.115	0.375	-0.21	0.11	-0.1	-0.29	-0.08	0.18	-0.39	-0.54	0.13	-0.07	0.17	0.09	-0.235	-0.235	-0.105	0.165	0.045	0.045	0.27
YDL080C	THI3	positive regulation of transcription from RNA polymerase II promoter*	metal ion binding*	0	-0.1	-0.2	-0.26	0.5	0.49	0.66	0.9	0.5	0.055	0.085	-0.505	-0.015	0.075	-0.125	-0.295	-0.065	-0.135	0.145	-0.005	-0.215	-0.385	0.175	0.025	0.185	0.265	0.095	-0.4	-0.19	0.01	-0.16	-0.36	-0.25	0.32	-0.07	-0.56	-0.36	-0.26	-0.18	-1.05	-0.9	-0.9	-1.12	-0.81	-0.9	-0.255598
YDL087C	LUC7	mRNA processing*	mRNA binding	0	0.45	-0.26	-0.4	-0.68	-0.51	-0.54	-0.53	-0.84	-0.23	1.27	-0.03	-0.02	-0.24	-0.44	-0.57	-0.56	-0.42	-0.12	0.05	-0.19	0.25	0.32	0.18	0.31	0.37	0.07	0.49	0.23	0.09	-0.05	-0.23	0.16	0.83	0.61	0.27	0.09	0.2	0.04	-1.05	-0.83	-0.56	-0.81	-0.43	-0.56	1.29723
YDL098C	SNU23	mRNA processing*	metal ion binding*	0	-0.46	-0.67	-0.72	-0.31	-0.15	0.1	-0.13	0.53	-0.11	-0.19	-0.21	-0.25	0.26	0.04	0.12	0.1	-0.05	0.11	0.05	0.12	-0.27	-0.1	0.21	0.09	0.22	0.33	-0.48	0.12	-0.33	-0.35	-0.1	0.04	-0.9	-0.44	0.34	0.31	0.06	-0.32	0.295	0.295	0.255	0.205	0.055	0.205	-0.598738
YDL108W	KIN28	transcription*	nucleotide binding*	0	-0.44	-0.48	-0.49	-0.05	0.23	0.69	0.75	0.36	0.07	-0.11	-1.04e-17	0.06	0.36	0.54	0.62	0.59	0.67	0.17	-0.08	-0.1	-0.2	0.02	0.22	0.06	0.22	0.24	-0.11	-0.06	-0.27	-0.44	-0.03	0.2	-0.83	-0.84	-0.64	-0.04	-0.09	0.13	0.19	0.23	0.25	0.22	0.44	0.48	-0.18
YDL116W	NUP84	transport*	structural molecule activity	0	-0.26	-0.28	-0.17	-0.6	-0.53	-0.85	-0.64	-0.94	0.075	-0.395	-0.375	-0.705	-0.825	-0.855	-0.925	-0.995	-1.115	0.28	0.1	0.06	-0.33	-0.57	-0.47	-0.57	-0.56	-0.54	-0.33	-0.3	-0.18	-0.28	-0.21	-0.14	-0.68	-0.62	0.02	0.48	0	-0.01	-0.215	-0.195	-0.025	0.015	0.005	0.065	0.31
YDL122W	UBP1	ubiquitin cycle*	hydrolase activity*	0	-0.79	-0.53	-0.66	-0.38	-0.15	-0.26	-0.35	-0.23	-0.035	-1.815	-1.105	-0.755	-0.625	-0.535	-0.605	-0.715	-0.545	0.1	-0.08	-0.19	-0.66	-0.21	-0.2	-0.19	-0.39	-0.2	-0.64	-0.6	-0.21	-0.23	-0.12	-0.12	-0.72	-0.81	-0.64	-0.46	-0.27	-0.23	-0.625	-0.495	-0.275	-0.095	-0.085	-0.565	-0.27
YDL177C	YDL177C	biological_process	molecular_function	0	-0.63	-0.61	-0.55	-0.14	0.09	0.11	0.53	1.04	-0.335	-0.785	-0.685	-0.845	-0.565	-0.225	-0.275	-0.365	-0.225	0.075	0.045	0.015	-0.325	-0.165	0.035	-0.015	-0.215	0.065	-0.19	0.11	-0.17	-0.24	0.09	0.06	-1	-0.65	-0.11	0.31	0.23	-0.15	-0.26	-0.29	-0.06	0.12	-0.09	0.03	-0.588257
YDL180W	YDL180W	biological_process	molecular_function	0	0.17	0.08	-0.26	0.21	0.46	0.48	0.87	1.49	-0.375	0.065	-0.315	-0.015	0.365	0.155	0.065	0.005	-0.005	-0.475	-0.165	-0.465	-0.735	-0.495	-0.575	-0.565	-0.505	-0.555	-0.16	-0.21	-0.42	-0.21	-0.13	-0.16	0.09	0.04	-0.07	-0.17	-0.21	-0.09	0.295	0.235	0.125	0.175	-0.045	0.195	-0.308831
YDL182W	LYS20	metabolic process*	transferase activity*	0	-1.81	-1.5	-0.71	-0.51	0.27	-0.32	0.01	0.44	-0.365	-1.495	-1.625	-0.515	-0.025	0.535	0.315	0.285	0.795	-0.24	-0.06	0.19	-0.28	-0.08	-0.1	-0.05	-0.12	-0.36	0.2	-0.16	-0.42	-0.52	-0.51	-0.06	-1.52	-1.56	-1.9	-1.91	-1.56	-0.82	0.045	-0.025	-0.215	-0.345	-0.255	-0.185	-0.0869274
YDL182W	LYS20	metabolic process*	transferase activity*	0	-1.81	-1.5	-0.71	-0.51	0.27	-0.32	0.01	0.44	-0.365	-1.495	-1.625	-0.515	-0.025	0.535	0.315	0.285	0.795	-0.24	-0.06	0.19	-0.28	-0.08	-0.1	-0.05	-0.12	-0.36	0.2	-0.16	-0.42	-0.52	-0.51	-0.06	-1.52	-1.56	-1.9	-1.91	-1.56	-0.82	0.045	-0.025	-0.215	-0.345	-0.255	-0.185	-0.0869274
YDL209C	CWC2	cell cycle*	molecular_function*	0	-1.04	-0.77	-0.27	0.04	0.36	0.57	0.37	0.71	-0.08	-0.58	-0.3	0.22	0.38	0.38	0.38	0.22	0.28	0.135	0.105	0.005	0.275	1.085	1.195	1.425	1.575	1.325	-0.19	-0.21	-0.3	-0.24	-0.07	0.14	0.28	0.15	0	0.15	0.39	0.13	1.085	0.895	0.845	0.735	1.005	0.585	0.00662505
YDR014W	RAD61	response to radiation	molecular_function	0	0.07	0.21	-0.19	0.65	0.7	0.63	0.73	0.52	-0.155	0.065	-0.055	0.095	0.435	0.425	0.275	0.175	0.095	-0.06	-0.12	-0.05	-0.06	0.53	0.78	0.86	0.85	0.76	0.18	0.28	-0.23	-0.06	-0.14	0.17	-0.04	-0.02	0.41	0.71	0.02	-0.06	-0.28	-0.15	-0.17	-0.22	-0.24	-0.1	0.696294
YDR026C	YDR026C	biological_process*	DNA binding	0	-0.97	-0.83	-0.71	-0.6	-0.54	-0.67	-0.55	-0.47	0.175	-0.075	-0.445	-0.145	-0.085	0.085	0.085	0.135	0.185	0.15	-0.09	-0.29	-0.99	-0.69	-0.69	-0.51	-0.38	-0.4	-0.16	-0.27	-0.36	-0.39	-0.36	-0.2	0.61	0.29	0.04	0.07	0.02	-0.23	-0.75	-0.65	-0.63	-0.64	-0.72	-1.01	-0.15
YDR045C	RPC11	transcription*	transferase activity*	0	-0.6	-0.78	-0.53	0.09	0.21	0.31	-0.67	0.58	-0.2	-1.36	-0.44	-0.72	0.09	-0.22	-0.12	-0.51	-0.82	0.29	0.02	-0.06	-0.59	-1.18	-1.33	-1.35	-1.84	-1.51	-0.73	-0.08	-0.52	-0.61	-0.07	0.12	-1.53	-1.15	0.21	0.24	0.35	0.03	-0.49	-0.58	-0.09	0.12	0.12	0.46	-0.39
YDR049W	YDR049W	biological_process	molecular_function*	0	-0.51	-0.46	-0.56	-0.49	-0.58	-0.58	-0.54	-0.49	-0.005	-0.415	-0.415	0.265	0.465	0.185	0.265	0.225	0.205	0.245	0.105	0.015	-0.285	0.565	0.245	0.215	0.425	-0.005	0.02	-0.3	-0.38	-0.32	-0.26	-0.2	0.51	0.3	-0.09	-0.1	-0.14	-0.31	-0.26	-0.25	-0.26	-0.58	-0.32	-0.3	-0.285013
YDR065W	YDR065W	vacuolar acidification	molecular_function	0	0.25	0.19	-0.43	-0.3	-0.21	-0.31	-0.19	-1.01	-0.115	-0.455	-1.015	-0.315	-0.235	-0.345	-0.515	-0.505	-0.725	0.16	-0.07	-0.05	-0.46	0.11	0.23	0.4	0.27	-0.27	-0.19	-0.01	-0.54	-0.5	-0.23	-0.1	-0.6	-0.48	0.04	0.17	0.19	-0.27	0.14	0.2	0.25	0.03	0.16	0.09	0.0318701
YDR066C	YDR066C	biological_process	molecular_function	0	0.59	0.38	-0.02	0.54	0.17	0.28	0.36	0.02	0.08	0.85	0.38	0.52	0.34	0.47	0.46	0.42	0.15	0.07	0.24	-0.08	0.07	0.1	0.13	0.09	0.21	-0.15	0.22	0.51	-0.05	-0.09	0.25	0.33	0.15	0.37	1.01	0.73	0.59	0.44	-0.05	0.03	0.11	0.12	0.21	0.32	0.346973
YDR075W	PPH3	response to drug*	hydrolase activity*	0	-1.52	-0.91	-0.29	0.1	0.48	0.59	0.51	0.83	0.16	-0.58	-0.36	0.28	0.39	0.79	0.77	0.79	0.74	0.225	0.205	-0.015	-0.415	-0.505	-0.545	-0.425	-0.435	-0.525	0.33	0.39	0.55	0.29	0.12	0.21	0.12	0.43	0.95	0.89	0.64	0.4	2.78e-17	-0.07	-0.05	0.02	0.1	0.08	-0.0763096
YDR081C	PDC2	regulation of transcription*	DNA binding*	0	-0.66	-0.42	-0.19	0.08	0.03	-0.24	0.15	-0.14	0.115	-0.215	-0.005	0.175	0.145	0.155	0.035	0.035	0.075	0.15	-0.08	-0.25	-0.17	-0.02	0.14	0.16	-0.02	0.31	0.3	0.23	0.35	0.26	0.17	0.14	0.75	0.67	0.24	0.3	0.06	0.2	-0.775	-0.775	-0.895	-0.835	-0.895	-1.075	0.53
YDR089W	YDR089W	membrane organization and biogenesis	molecular_function	0	-1.85	-2.42	-2.53	-2.4	-1.64	-1.64	-1.26	-0.95	0.17	0.39	-0.38	-0.85	-0.87	-1.04	-0.85	-0.7	0.3	0.12	0.1	-0.19	0.18	2.12	2.6	2.81	2.72	2.42	-0.84	-0.71	-0.86	-0.61	-0.33	-0.39	0.11	0.6	0.61	0.59	0.39	0.28	0.685	0.425	0.265	0.245	0.095	0.135	-0.527781
YDR090C	YDR090C	biological_process	molecular_function	0	-0.87	-0.84	-0.71	-0.18	0.09	0.27	0.85	1.09	0.315	1.395	0.345	-0.255	-0.515	-0.595	-0.495	-0.415	-0.115	-0.76	-0.82	-1.14	-1.07	-1.05	-1.22	-1.03	-1.34	-1.24	-0.77	-0.73	-0.55	-0.46	-0.31	-0.31	0.32	0.74	0.92	1.26	1.2	1.1	-1.29	-1.29	-1.07	-0.91	-1.02	-0.84	-0.611052
YDR110W	FOB1	DNA recombination*	rDNA binding	0	-1.73	-1.21	-0.76	-0.51	-0.56	-0.49	-0.73	-0.53	0.055	-1.585	-0.835	-0.095	-0.005	-0.065	-0.235	-0.195	-0.345	0.305	-0.255	-0.365	-0.415	0.395	0.335	0.345	0.495	0.295	-0.02	0.01	-0.11	-0.32	-0.2	-0.09	-0.1	-0.05	0.22	0.26	0.14	-0.24	0.71	0.75	0.85	0.66	0.7	0.35	-0.06
YDR117C	TMA64	biological_process*	RNA binding*	0	-0.18	-0.38	-0.57	-0.71	-0.73	-0.56	-0.47	-0.4	0.105	0.235	-0.195	-0.575	-0.545	-0.475	-0.475	-0.455	-0.405	0.075	0.235	0.345	-0.155	-0.385	-0.605	-0.395	-0.425	-0.545	-0.19	-0.38	-0.02	-0.19	-0.19	0.01	0.25	-0.12	-0.01	-0.12	-0.07	0.03	0.115	0.095	-0.215	-0.415	-0.145	-0.275	-0.313961
YDR121W	DPB4	transcription*	transferase activity*	0	-1.37	-0.92	0.05	-0.43	-0.22	-0.06	0.07	0.57	0.01	-1.16	-0.54	-0.64	-0.96	-0.88	-0.68	-0.51	-0.4	0.305	0.095	-0.045	-0.505	-0.865	-0.895	-0.665	-0.635	-0.555	-0.02	0.01	-0.15	-0.21	-0.03	0.38	-0.79	-0.23	0.2	0.39	0.57	0.21	-1.04	-1.06	-1	-1.07	-1.14	-1.09	-0.382255
YDR123C	INO2	transcription*	DNA binding*	0	-2.21	-1.99	-1.18	-0.75	-0.6	-0.54	-0.42	0.03	-0.035	-0.965	-1.745	-0.785	0.275	0.065	-0.035	-0.165	-0.175	0.095	-0.535	-1.195	-1.305	-0.515	-0.265	-0.105	-0.125	-0.575	-0.23	-0.22	0	0	-0.32	-0.26	0.24	-0.05	-0.16	-0.55	-0.17	-0.08	-1.435	-1.625	-1.375	-1.435	-1.315	-1.465	-0.155877
YDR135C	YCF1	transport*	nucleotide binding*	0	-0.47	-0.56	-0.75	-0.67	-0.62	-0.79	-0.78	-1.25	-0.41	0.19	-0.35	-0.35	-0.42	-0.55	-0.67	-0.69	-0.86	-0.53	-0.44	-0.37	-0.38	-0.18	-0.36	-0.37	-0.4	-0.48	-0.23	-0.25	-0.16	-0.31	-0.22	-0.18	0.06	-0.09	-0.05	-0.13	0.16	0.08	0.19	0.21	0.11	0.26	0.1	0.27	0.548007
YDR139C	RUB1	ubiquitin cycle*	protein tag	0	-0.61	-0.91	-0.89	-0.77	-0.8	-0.25	-0.64	-0.15	-0.065	-0.205	-0.545	-0.755	-0.605	-0.525	-0.315	-0.235	-0.215	0.265	0.125	0.185	0.235	-0.045	0.085	-0.085	0.245	0.075	-0.42	-0.12	-0.53	-0.57	-0.29	-0.18	-0.35	-0.26	0.4	0.27	0.27	-0.25	0.73	0.92	1.05	1.01	1.1	1.31	0.24
YDR140W	MTQ2	methylation*	transferase activity*	0	-0.72	-0.56	-0.43	-0.16	0.04	0.26	0.27	0.39	0.1	0.63	0.4	0.43	0.42	0.56	0.44	0.36	0.34	0.21	0.06	0.02	0.07	0.32	0.4	0.44	0.41	0.31	0.37	0.2	-0.17	-0.14	0.08	0.3	-0.07	-0.14	0.48	0.44	0.4	0.42	1.135	0.915	0.795	0.885	0.835	1.175	0.1
YDR151C	CTH1	transcription*	metal ion binding*	0	-0.12	-0.36	-0.56	-0.17	-0.46	-0.64	-0.57	-0.86	0.13	-0.09	-0.36	0.31	-0.1	-0.33	-0.46	-0.5	-0.59	0.09	0.25	-0.33	-0.31	-0.13	-0.26	0.09	-0.29	-0.18	-0.05	-0.28	-0.33	-0.35	-0.25	-0.06	-0.51	-0.6	-0.32	-0.08	0.03	0.16	-0.825	-0.715	-0.975	-0.805	-0.665	-0.605	1.04236
YDR152W	GIR2	biological_process*	molecular_function*	0	-1.09	-0.69	-0.63	-0.1	0.2	0.1	0.02	0.36	0.02	-2.22	-1.39	-0.87	-0.61	-0.46	-0.57	-0.52	-0.61	0.335	0.055	-0.115	-0.565	-0.405	-0.285	-0.235	-0.345	-0.115	-0.5	-0.32	-0.34	-0.4	-0.12	0.01	-1.18	-1.12	-0.37	0.06	0.15	-0.08	0.12	0.16	0.32	0.28	0.32	-0.06	-0.323081
YDR153C	ENT5	transport*	lipid binding*	0	0.13	0.04	0.14	0.42	0.22	-0.13	-0.18	-0.24	0.2	0.41	0.07	0.35	0.71	0.39	0.32	0.25	-0.11	0.25	0.2	0.15	0.22	0.41	0.38	0.4	0.45	0.32	0.04	-0.22	0.06	0.06	0.02	0.06	0.96	0.8	0.05	0.16	0.13	0.12	-0.205	-0.275	-0.485	-0.725	-0.635	-0.625	-0.160967
YDR167W	TAF10	transcription*	general RNA polymerase II transcription factor activity*	0	-0.19	0.03	0	0.05	0.28	0.9	0.63	1.5	0.115	-0.165	0.065	-0.205	-0.385	-0.135	0.015	0.075	0.155	0.295	0.325	0.245	0.205	-0.465	-0.335	-0.285	-0.115	-0.185	-0.06	0.29	-0.24	-0.18	0	-0.04	0.05	-0.11	-0.1	0.13	-0.05	-0.09	-0.11	0.07	0.4	0.26	0.45	0.33	-0.99077
YDR191W	HST4	transcription*	hydrolase activity*	0	-0.11	-0.02	-0.15	0.61	0.64	0.69	0.37	-0.12	-0.14	0	0.26	0.08	0.07	-0.01	-0.09	-0.27	-0.47	0.085	0.345	0.075	0.415	-0.125	-0.295	-0.295	-0.345	-0.245	0.21	0.15	0.23	0.1	0.12	0.17	0.31	0.34	0.66	0.64	0.22	0.11	0.41	0.1	0	-0.11	-0.38	-0.03	0.076877
YDR206W	EBS1	telomere maintenance*	molecular_function	0	-0.73	-0.47	-0.2	0.33	0.45	0.59	0.77	0.45	-0.105	-0.625	-0.325	-0.165	-0.185	-0.025	-0.075	-0.085	-0.085	0.105	-0.105	-0.255	-0.125	0.015	-0.125	0.055	-0.145	0.065	-0.21	-0.06	-0.03	-0.14	-0.08	-0.12	0	0.12	0.14	0.16	0.17	-0.02	-0.165	0.065	0.015	0.035	-0.115	-0.115	0.53
YDR207C	UME6	transcription*	metal ion binding*	0	-0.15	-0.84	-0.41	-0.22	0.23	0.17	0.93	1.17	0.135	0.345	-0.015	0.235	0.805	0.705	0.585	0.625	0.505	0.27	0.06	-0.16	-0.67	-0.05	0.07	0.48	0.4	0.43	-0.1	-0.32	0.33	0.25	0.12	-0.04	0.44	-0.03	-0.58	-0.15	0.08	-0.09	-0.315	-0.725	-0.505	-0.625	-0.535	-0.585	0.261965
YDR211W	GCD6	translation*	nucleotidyltransferase activity*	0	-1.41	-1.01	-0.88	-1.05	-0.84	-0.87	-1.1	-0.83	0.11	-1.7	-1.24	-1.01	-0.92	-0.61	-0.49	-0.5	-0.56	0.26	0.04	-0.07	-0.17	1.17	0.42	0.01	-0.4	-0.7	-0.37	-0.47	-0.3	-0.26	-0.33	-0.24	-0.3	-0.46	-0.25	-0.11	0.04	-0.1	0.54	0.58	0.43	0.28	0.46	0.37	-0.201503
YDR222W	YDR222W	biological_process	molecular_function	0	-3.01	-2.84	-1.57	-3.2	-3.14	-3.49	-3.32	-3.21	-0.375	-2.145	-1.035	0.525	1.985	1.625	1.045	0.465	0.575	0.045	-0.955	-1.255	-0.855	1.085	1.735	1.735	2.035	1.655	2.06	1.25	0.87	1	0.16	0.68	1.83	1.44	0.67	0.87	0.66	1.09	-0.91	-1.68	-2.3	-2.66	-2.63	-1.93	0.365903
YDR232W	HEM1	metabolic process*	transferase activity*	0	-0.54	0.58	0.37	0.71	1.23	1.04	1.1	1.07	0.04	-1.95	-1.06	-0.53	-0.91	-0.74	-0.82	-0.65	-0.75	0.045	-0.155	-0.295	-0.475	-0.355	-0.715	-0.655	-0.365	-0.435	0.09	-0.21	0.05	0.23	0.17	-0.19	0.63	0.49	-1.32	-0.88	-1.22	-0.63	-0.61	-0.15	-0.14	0.09	0.38	0.4	-0.19498
YDR235W	PRP42	mRNA processing*	RNA binding	0	-0.16	-0.18	-0.28	-0.52	-0.34	-0.5	-0.54	-0.36	0.08	-0.12	-0.11	-0.48	-0.55	-0.43	-0.39	-0.4	-0.53	0.14	0.02	-0.04	-0.24	-0.4	-0.15	-0.24	-0.31	-0.2	-0.03	0.42	0.28	0.01	0.05	0.13	-0.97	-0.67	0.52	0.69	0.48	0.16	-0.625	-0.645	-0.535	-0.335	-0.595	-0.805	-0.528855
YDR243C	PRP28	mRNA processing*	nucleotide binding*	0	-0.75	-0.52	-0.35	-0.98	-0.2	-0.57	-0.48	-0.53	-0.085	0.355	0.075	-0.145	-0.295	-0.075	-0.025	-0.035	0.265	-0.055	-0.405	-0.245	0.315	0.445	0.635	0.615	0.775	0.515	-0.45	-0.12	-0.18	-0.3	-0.09	-0.07	0.71	0.39	0.32	0.42	0.32	0.16	0.15	-0.2	-0.17	-0.55	-0.43	-0.31	0.683202
YDR249C	YDR249C	biological_process	molecular_function	0	-1.06	-1.03	-1.05	-0.4	-0.18	-0.02	0.45	0.64	-0.13	-0.39	-0.56	-0.09	0.24	0.24	0.32	0.06	0.19	-0.175	-0.485	-0.805	-1.095	-0.385	-0.345	-0.455	-0.605	-0.375	0.02	0.24	-0.1	0.04	0.07	0.31	-0.44	-0.23	0.33	0.45	0.34	0.34	-0.355	-0.475	-0.535	-0.205	-0.525	-0.225	-0.3
YDR253C	MET32	transcription*	metal ion binding*	0	0.67	0.09	-1.25	0.96	0.36	0.42	-0.16	-0.81	-0.125	0.085	-0.495	-0.425	0.305	0.745	0.755	1.125	2.125	0.125	0.305	-0.645	-1.675	-2.335	-1.625	-1.415	-1.365	-1.035	-0.46	-0.1	-0.35	-0.47	-0.18	-0.04	-0.45	-0.18	0.63	0.46	0.36	-0.2	-0.59	-0.9	-0.81	-0.72	-0.88	-0.85	-0.337022
YDR267C	CIA1	biological_process*	molecular_function*	0	-0.46	-0.28	-0.18	-0.51	-0.36	-0.64	-0.81	-0.88	0.055	-0.305	-0.265	-0.445	-0.365	-0.225	-0.205	-0.185	-0.465	0.125	0.165	0.065	-0.465	-0.965	-0.995	-0.905	-0.845	-1.105	-0.37	-0.27	-0.26	-0.3	0	0.04	-0.56	-0.13	0.15	-0.05	0.09	0.22	-0.195	0.085	0.175	0.235	0.425	0.745	-0.882906
YDR295C	HDA2	transcription*	histone deacetylase activity	0	-0.04	-0.17	-0.39	-0.72	-0.6	-1.08	-0.96	-1.32	0.13	-0.2	-0.13	-0.27	-0.04	-0.16	-0.21	-0.24	-0.31	0.37	0.18	0.09	-0.17	-0.51	-0.25	-0.02	0.21	0.13	-0.1	-0.14	-0.12	-0.36	-0.18	-0.16	0.32	-0.02	-0.08	0.09	0.13	-0.33	0.31	0.27	0.19	-0.08	-0.09	-0.28	-0.35
YDR297W	SUR2	metabolic process*	catalytic activity*	0	-0.75	-0.19	-0.18	0.46	0.89	1.03	0.98	1.09	-0.15	-0.28	0.49	0.23	0.43	0.57	0.58	0.46	0.72	-0.49	-0.61	-0.26	-1.18	-1.63	-0.95	-0.99	-0.52	-0.16	-1.5	-1.4	-1.03	-0.72	-0.13	-0.17	-0.73	-0.55	-1.09	-0.76	-0.68	-0.34	0.155	0.125	0.105	0.345	0.655	0.965	-0.719133
YDR310C	SUM1	transcription*	DNA binding*	0	-0.55	-0.45	-0.34	0.53	0.94	1.03	1.3	1.37	0.015	-0.645	-0.145	0.035	0.525	0.555	0.485	0.415	0.325	0.185	0.075	0.225	0.185	0.335	0.385	0.605	0.605	0.575	-0.25	-0.32	-0.08	-0.18	-0.2	-0.24	1.25	0.64	-0.54	-0.55	-0.3	-0.27	-0.115	0.205	0.035	0.025	-0.075	-0.555	0.386929
YDR312W	SSF2	ribosome biogenesis and assembly*	rRNA binding	0	-1.53	-0.61	-0.48	-0.6	-0.29	-0.35	-0.38	0.38	0	-1.53	-0.86	-0.43	-0.1	-0.18	-0.26	-0.23	-0.34	0.335	0.015	0.005	-0.265	-0.445	-0.305	-0.265	-0.275	-0.265	-0.13	-0.07	-0.11	-0.23	0.05	0.11	-0.11	-0.23	-0.25	0.1	0.07	-0.06	0.32	0.3	0.42	0.21	0.29	0.22	-0.17
YDR333C	YDR333C	biological_process	molecular_function	0	-0.33	-0.61	-0.74	-0.6	-0.7	-0.53	-0.29	-0.32	0.095	-0.395	-0.695	-0.615	-0.485	-0.545	-0.695	-0.875	-0.815	0.195	0.205	-0.055	-0.615	-0.555	-0.535	-0.395	-0.355	-0.275	-0.26	-0.34	-0.13	-0.2	-0.05	0.01	-0.3	-0.18	-0.11	-0.04	-0.1	0.07	-0.325	-0.285	-0.295	-0.325	-0.375	-0.055	-0.0282276
YDR339C	FCF1	rRNA processing*	molecular_function	0	-1.16	-1.04	-0.67	-0.59	-0.25	-0.33	0.02	-0.02	-0.1	-1.68	-1.01	-0.98	-0.88	-0.77	-0.76	-0.62	-0.69	0.235	0.045	-0.085	-0.345	-0.305	-0.135	-0.205	-0.155	-0.025	-0.22	-0.01	-0.11	-0.35	0.01	0.15	-1.31	-0.73	0.33	0.53	0.39	0.09	-0.25	-0.38	-0.28	-0.23	-0.35	-0.37	-0.52
YDR346C	SVF1	response to oxidative stress	molecular_function	0	-0.86	-0.63	-0.48	-0.37	0.04	-0.24	-0.43	-0.31	0.05	-0.93	-0.41	-0.14	0.19	0.33	0.27	0.25	0.07	0.1	-0.07	-0.05	-0.46	-0.36	-0.36	-0.42	-0.62	-0.78	-0.17	-0.07	0	-0.36	-0.1	-0.05	-0.09	-0.12	0.28	0.37	0.29	0.03	0.085	0.105	0.255	0.255	0.305	0.205	-0.06
YDR349C	YPS7	biological_process*	hydrolase activity*	0	-0.74	-0.44	-0.41	-0.44	-0.21	-0.28	0.21	0.51	-0.31	-0.52	-0.62	-0.66	-1.01	-0.77	-0.56	-0.44	-0.27	-0.545	-0.705	-0.765	-0.545	-0.735	-0.845	-0.765	-1.045	-0.685	0.03	0.09	0.19	0.06	0.01	0.11	0.16	0.37	-0.25	-0.23	-0.22	0.08	-0.625	-0.585	-0.785	-0.645	-0.865	-0.745	-0.02
YDR352W	YDR352W	biological_process	molecular_function	0	-0.93	-0.63	-0.53	-0.44	-0.69	-0.84	-0.82	-0.86	-0.21	1.19	0.72	0.37	-0.06	-0.13	-0.14	-0.29	-0.48	-0.52	-0.64	-0.65	-0.43	-0.61	-0.59	-0.71	-0.75	-0.84	-0.48	-0.35	-0.48	-0.32	-0.12	-0.05	0.87	1.22	0.62	0.48	0.57	0.79	-1.11	-1.01	-1.09	-0.92	-0.8	-0.66	-0.45
YDR364C	CDC40	cell cycle*	RNA splicing factor activity, transesterification mechanism	0	-0.44	-0.27	-0.24	0.79	1.15	1.51	1.7	1.62	-0.04	-0.86	-0.44	0.13	0.22	0.25	0.24	0.2	0.18	-0.075	-0.445	-0.575	-0.595	0.095	-0.215	-0.315	-0.125	-0.345	-0.19	-0.08	-0.16	-0.1	-0.12	-0.1	0.04	0.03	0.28	0.1	0.14	0.04	-1.095	-1.015	-0.755	-0.785	-0.625	-0.835	0.43
YDR416W	SYF1	cell cycle*	molecular_function	0	-0.35	-0.35	-0.24	0.03	0.09	0.13	0.16	0.19	0.075	-0.105	-0.015	0.145	0.345	0.375	0.395	0.345	0.295	0.225	0.105	-0.165	-0.295	-0.135	0.105	0.095	0.145	0.215	-0.02	-0.03	0.23	0.11	0.19	0.21	0.22	0.36	0.07	0.33	0.11	0.27	-0.56	-0.55	-0.65	-0.7	-0.69	-0.43	0.26
YDR420W	HKR1	cell wall organization and biogenesis*	osmosensor activity	0	-0.19	-0.11	-0.22	0.44	0.51	0.42	0.45	0.18	-0.305	-0.365	-0.245	-0.075	0.115	0.275	0.335	0.215	0.065	-0.31	-0.47	-0.56	-0.57	-0.05	0.28	0.29	0.22	0.22	-0.33	-0.22	-0.09	-0.31	-0.14	-0.19	0.21	-0.04	-0.42	-0.46	-0.41	-0.11	-0.865	-0.965	-0.895	-0.685	-0.705	-0.695	1.07
YDR433W	YDR433W	biological_process	molecular_function	0	0.36	-0.32	-0.39	-1.19	-0.37	-0.82	-0.17	1.29	-0.185	0.135	-0.325	-0.785	-0.735	-0.875	-0.725	-0.625	-0.265	0.045	0.405	0.495	0.375	-0.385	-0.615	-0.515	-0.745	-0.535	0.1	-0.27	0.7	0.79	0.54	0.5	1.22	0.78	-1.12	-0.66	-0.35	0.41	-0.885	-0.735	-0.515	-0.305	0.195	0.705	-0.22671
YDR439W	LRS4	cell cycle*	molecular_function	0	0.13	-0.09	-0.31	0.29	0.37	0.65	0.84	0.6	0.11	0.52	0.13	-0.03	0.04	0.02	0.1	0.06	0.07	0.115	-0.045	-0.175	-0.535	-0.065	-0.035	-0.055	-0.205	0.015	-0.47	-0.39	-0.21	-0.27	-0.32	-0.12	-0.6	-0.73	0.05	0.13	0.23	-0.17	-0.465	-0.565	-0.335	-0.265	-0.495	-0.895	0.15453
YDR448W	ADA2	transcription*	metal ion binding*	0	-0.38	-0.54	-0.49	-0.43	-0.49	-0.51	-0.96	-0.56	-0.13	-0.44	-0.25	-0.16	0.29	0.05	-0.15	-0.23	-0.03	-0.045	0.045	-0.095	-0.325	0.225	0.055	0.125	-0.285	-0.115	-0.34	-0.13	-0.04	-0.01	-0.01	0.11	0.54	-0.01	0.03	-0.02	0.42	0.22	1.92	1.62	1.91	1.96	2.08	1.56	-0.18
YDR459C	PFA5	protein amino acid palmitoylation	transferase activity*	0	-0.39	-0.29	-0.46	-0.01	0.43	0.63	0.66	0.83	-0.08	0.76	0.01	0.21	0.25	0.44	0.52	0.57	0.62	-0.3	-0.33	-0.42	-0.6	-0.13	-0.12	0	-0.04	0.05	-0.01	0.08	-0.18	-0.08	0.02	0.18	-0.05	0.34	0.46	0.46	0.4	0.46	0.04	0.05	-0.03	0.19	0.1	0.33	-0.15
YDR463W	STP1	positive regulation of transcription from RNA polymerase II promoter*	metal ion binding*	0	-0.16	-0.22	-0.01	0.45	0.55	0.82	1.14	1.15	-0.095	-0.495	-0.235	0.085	0.125	0.075	0.035	-0.015	0.405	-0.04	-0.14	-0.19	0.09	0.5	0.55	0.48	0.64	0.47	0.07	-0.12	0.16	-0.04	-0.18	-0.29	0.28	0.24	-0.2	-0.12	0.04	-0.18	-0.765	-0.695	-0.605	-0.975	-0.745	-0.975	0.789146
YDR472W	TRS31	transport*	Ras guanyl-nucleotide exchange factor activity	0	-0.5	-0.69	-0.83	-0.45	-0.27	-0.13	-0.09	-0.18	-0.27	-0.28	-0.46	-0.41	-0.34	0.57	0.44	0.21	0.21	-0.375	-0.365	-0.385	-0.905	-1.085	-1.215	-1.055	-1.395	-1.055	-0.37	-0.2	-0.12	-0.05	0.14	0.43	-0.35	-0.43	-0.32	-0.12	0.04	0.59	-1.99	-1.67	-1.61	-1.46	-1.14	-0.94	-0.455181
YDR478W	SNM1	rRNA processing*	hydrolase activity*	0	-1.46	-1.47	-1.04	-0.71	-0.49	-0.43	-0.5	-0.35	-0.33	-1.47	-1.65	-0.93	-0.6	-0.65	-0.67	-0.62	-0.49	0.2	-0.09	-0.34	-0.36	0.21	0.29	0.41	0.48	0.47	-0.06	-0.1	-0.24	-0.33	-0.28	0.09	-0.54	-0.41	-0.16	0.23	0.15	-0.06	0.905	0.815	0.865	0.795	1.495	0.825	-0.178099
YDR482C	CWC21	biological_process*	molecular_function	0	-0.44	-0.81	-0.59	-1.07	-0.71	-0.65	-0.99	-0.31	0.325	0.985	0.305	0.265	-0.335	-0.285	-0.065	0.165	0.425	0.28	0.07	-0.37	-0.44	-0.66	-0.58	-0.42	-0.39	-0.49	0.13	0.42	0.04	-0.22	-0.11	0	0.52	0.64	0.54	0.49	0.53	0.39	-0.09	-0.15	-0.03	-0.22	-0.23	-0.33	-1.03849
YDR483W	KRE2	protein amino acid glycosylation*	transferase activity*	0	0.01	-0.02	-0.33	-0.02	0.12	0.07	0.12	-0.04	-0.29	0.12	-0.23	-0.12	-0.56	-0.51	-0.43	-0.38	-0.66	-0.475	-0.285	-0.245	0.355	0.655	0.655	0.725	0.745	0.815	0.28	0.16	0.09	0.02	-0.06	0	0.38	0.48	0.6	0.59	0.47	0.42	0.48	0.2	0.02	-0.09	-0.38	-0.46	0.0676009
YDR514C	YDR514C	biological_process	molecular_function	0	-1.43	-0.99	-0.64	-0.81	-0.6	-0.66	-0.65	-0.16	-0.18	-2.6	-2.03	-1.37	-0.64	-0.36	-0.26	-0.21	-0.19	0.13	-0.29	-0.4	-1.11	-0.59	-0.24	-0.02	0.15	-0.08	-0.22	-0.36	-0.3	-0.01	0.31	0.24	0.06	-0.01	-0.26	-0.09	0.06	0.03	0.025	0.115	0.225	0.115	0.435	0.455	-0.74
YDR524C	AGE1	transport*	metal ion binding*	0	-0.36	-0.05	-0.36	0.27	0.15	0.3	0.16	-0.07	0.05	0.11	-0.03	0.15	0.23	0.34	0.44	0.24	0.31	0.105	-0.135	-0.355	-0.825	-0.945	-0.715	-0.455	-0.415	-0.345	-0.29	-0.08	-0.11	-0.06	-0.08	0	0.2	0.2	0.49	0.44	0.12	0.25	-1.65	-1.82	-1.77	-1.64	-1.6	-1.79	0.46323
YDR541C	YDR541C	biological_process*	catalytic activity*	0	-0.52	-0.73	-0.94	-0.91	-0.86	-0.95	-0.81	-1.41	-0.165	0.255	-0.265	-0.285	-0.345	-0.205	-0.105	-0.175	-0.125	-0.27	-0.43	-0.38	-0.11	0.2	0.12	-0.08	-0.06	-0.54	-0.73	-0.45	-0.31	-0.43	-0.4	-0.11	-1.09	-1.12	-1.43	-1.56	-0.95	-0.56	-0.365	-0.715	-0.795	-0.725	-0.635	-0.475	-0.455383
YEL006W	YEA6	transport*	transporter activity*	0	-0.31	-0.35	-0.31	0.15	0.27	0.62	0.64	0.9	0.165	1.485	0.875	0.745	0.485	0.355	0.295	0.285	0.305	0.025	-0.035	-0.055	0.155	0.485	0.345	0.355	0.035	0.165	-0.34	-0.24	-0.19	-0.37	-0.12	-0.05	0.56	0.61	0.61	0.78	0.59	0.79	-1.005	-1.065	-0.885	-0.815	-0.795	-0.875	-0.17
YEL018W	EAF5	transcription*	molecular_function	0	-0.45	-0.59	-0.41	-0.86	-0.78	-0.81	-0.82	-0.46	0.125	0.335	-0.305	-0.365	-0.355	-0.305	-0.395	-0.455	-0.515	0.225	0.085	-0.225	-0.745	-0.885	-0.955	-0.845	-0.805	-1.035	-0.45	-0.05	-0.05	-0.13	-0.15	0.08	-0.82	-0.65	0.13	0.3	0.43	-0.01	-0.375	-0.505	-0.405	-0.325	-0.185	-0.535	-0.47
YEL022W	GEA2	ER to Golgi vesicle-mediated transport*	guanyl-nucleotide exchange factor activity*	0	-0.77	-0.7	-0.52	-0.42	-0.45	-0.65	-0.95	-1.32	0.09	-0.62	-0.55	-0.6	-0.39	-0.27	-0.3	-0.29	-0.13	0.255	0.405	0.335	-0.315	-0.115	0.135	0.345	0.545	0.505	-0.06	0.05	0.19	0.18	0.06	0.09	0.2	0.21	0.5	0.41	0.36	0.19	0.01	0.11	0.08	0.15	0.18	0.32	-0.0447368
YEL029C	BUD16	cell cycle*	molecular_function*	0	-1.13	-1.26	-1.02	-0.96	-0.8	-0.65	-0.88	-0.37	-0.2	-0.66	-0.5	-0.65	-0.47	-0.3	-0.21	-0.34	-0.25	-0.09	-0.22	-0.44	-0.86	-0.75	-0.8	-0.81	-0.76	-0.8	-0.29	0.06	-0.37	-0.35	-0.19	0.07	-0.9	-0.35	0.12	0.17	0.17	0.31	-0.745	-0.545	-0.455	-0.385	-0.115	0.045	-0.4
YEL032W	MCM3	transcription*	nucleotide binding*	0	-0.37	-0.09	-0.04	0.05	0.01	-0.7	-1.04	-1.64	0.075	0.385	0.415	0.035	-0.335	-0.295	-0.255	-0.335	-0.415	0.105	0.425	0.145	0.015	-1.325	-1.545	-1.445	-1.445	-1.185	0.42	0.25	0.41	0.41	0.22	0.2	1.76	1.49	0.42	0.14	-0.07	0.28	-0.575	-0.225	-0.505	-0.475	-0.475	-0.465	-0.0712239
YEL036C	ANP1	protein amino acid N-linked glycosylation	mannosyltransferase activity*	0	-1.18	-0.66	-0.63	-0.65	-0.62	-0.88	-0.99	-0.83	-0.385	-1.495	-0.955	-0.895	-0.695	-0.635	-0.555	-0.415	-0.555	-0.26	-0.46	-0.34	-0.77	-0.61	-0.48	-0.24	-0.2	-0.32	-0.19	-0.48	-0.29	-0.28	-0.07	-0.17	0.33	-0.19	-1.05	-1.12	-0.6	-0.36	-0.71	-0.69	-0.88	-0.81	-0.63	-0.35	-0.61741
YEL037C	RAD23	response to DNA damage stimulus*	protein binding, bridging*	0	0.57	0.28	0.12	0.4	0.72	0.94	0.97	1.46	-0.005	0.075	-0.085	-0.135	0.805	0.825	0.965	1.015	0.745	0.07	0.35	0.47	0.29	0.05	0.02	-0.08	0.01	-0.26	0.69	0.28	0.66	0.61	0.42	0.46	1.29	0.69	-0.69	-0.64	-0.2	0.2	-0.375	-0.245	-0.245	-0.365	0.255	0.385	0.44
YEL038W	UTR4	biological_process*	molecular_function*	0	0.6	0.11	-0.5	-0.32	0.08	0.36	0.58	1.23	0	1.13	0.85	0.69	0.19	0.24	0.37	0.41	0.45	-0.18	-0.13	0.18	0.42	-0.54	-0.7	-0.49	-0.54	-0.27	0.02	0.1	-0.2	0.06	0.31	0.28	0.12	0.8	0.57	0.54	0.19	0.36	-0.1	-0.27	-0.16	0.08	-0.18	-0.26	0.289995
YEL043W	YEL043W	biological_process	molecular_function	0	-0.07	-0.08	-0.04	0.43	0.66	0.58	0.83	0.68	-0.355	-0.535	-0.545	-0.505	-0.105	-0.025	-0.255	-0.055	-0.225	-0.39	-0.23	-0.33	-0.56	-0.29	-0.3	-0.04	-0.54	-0.28	0.1	-0.14	0.18	0.05	0.12	0	0.49	0.15	-0.44	-0.8	-0.3	-0.04	-0.835	-0.755	-0.825	-0.675	-0.815	-0.795	-0.14
YEL046C	GLY1	amino acid metabolic process*	catalytic activity*	0	0.14	0.08	-0.12	0.13	0	-0.98	-1.3	-0.93	0.015	-1.355	-0.595	-0.005	0.005	-0.535	-0.765	-0.955	-0.385	-0.08	-0.2	-0.1	0.26	0.21	-0.35	-0.54	-0.56	-1.08	0.94	0.56	-0.04	0	-0.3	-0.53	1.11	0.79	-0.87	-0.81	-1.1	-0.55	-0.94	-0.93	-1.15	-1.11	-0.78	-0.63	0.201435
YEL063C	CAN1	transport*	amino acid transmembrane transporter activity*	0	-0.37	-0.52	-0.24	-0.82	-0.6	-0.65	-0.33	0.15	0.185	0.235	0.425	1.125	0.985	0.795	0.515	0.385	0.565	-0.12	-0.31	-0.58	-0.57	-0.57	-0.91	-1.23	-1.33	-1.13	-1.08	-0.92	0.9	0.75	-0.93	-1.32	0.54	0.11	-1.04	-0.91	-0.8	-0.6	-1.135	-0.805	-0.715	-0.375	-0.325	-0.625	-0.454324
YER002W	NOP16	ribosomal large subunit biogenesis and assembly	molecular_function	0	-1.9	-1.39	-0.77	0.28	0.84	1.28	0.86	1.78	-0.015	-1.785	-0.675	-0.665	-0.765	-0.455	-0.475	-0.495	-0.405	0.2	-0.13	-0.39	-0.56	-0.63	-0.48	-0.31	-0.53	0.2	-0.12	-0.29	0.2	-0.02	-0.11	0.01	0.14	0.16	0.63	0.73	0.82	0.24	0.295	0.075	-0.025	-0.195	-0.055	-0.355	-0.109138
YER005W	YND1	protein amino acid glycosylation	hydrolase activity*	0	-0.45	-0.32	-0.72	0.07	0.11	0.2	0.25	0.34	-0.085	-0.115	-0.225	-0.205	-0.105	-0.065	0.005	-0.065	-0.005	-0.065	-0.205	-0.165	-0.375	-0.065	-0.035	-0.215	-0.135	0.015	-0.3	-0.17	-0.16	-0.09	0.08	0.19	0.27	0.27	0.16	0	0.03	0.4	-0.7	-0.69	-0.75	-0.65	-0.69	-0.45	-0.34
YER029C	SMB1	mRNA processing*	RNA binding*	0	-0.38	-0.32	0.06	-0.08	-0.09	0.26	0.17	0.35	0.2	0.47	0.33	0.35	0.69	1.01	1.1	1.29	1.16	0.37	0.32	0.3	0.17	-0.15	0.09	0.22	0.31	0.19	-0.2	-0.25	-0.1	-0.24	-0.27	-0.12	-0.23	0.13	0.4	0.51	0.36	-0.09	-0.21	0.07	0.13	-0.18	-0.04	-0.2	-0.59
YER038C	KRE29	response to DNA damage stimulus*	molecular_function	0	-0.73	-0.18	-0.38	0.84	1.12	1.35	1.74	1.13	-0.03	-0.44	-0.7	0.43	0.33	0.21	0.25	0.22	0.24	-0.045	-0.435	-0.635	-0.445	0.815	0.815	0.965	1.285	0.935	0.85	0.72	0.19	-0.19	-0.06	0.13	0.79	0.81	0.65	0.58	0.33	0.14	-0.82	-1.11	-0.82	-1.1	-0.78	-1.6	0.75
YER052C	HOM3	metabolic process*	transferase activity*	0	-0.2	-0.23	-0.54	-0.9	-1.11	-2.24	-2.74	-3.19	-0.065	-2.695	-2.375	-0.285	0.295	0.135	-0.045	-0.115	0.955	-0.16	0.06	-0.01	-0.36	0.55	0.57	0.55	0.08	-0.41	0.34	-0.02	-0.38	-0.28	-0.04	-0.04	-0.64	-1.02	-1.6	-1.38	-1.08	-0.42	1.08	0.78	0.43	0.48	0.46	0.6	0.259567
YER060W	FCY21	biological_process*	nucleobase transmembrane transporter activity	0	-1.23	-1.72	-1.06	-2.81	-2.17	-2.41	-1.87	-1.22	-0.045	2.375	0.535	-0.565	-0.655	-0.465	-0.035	0.065	0.615	-0.475	-0.675	-0.275	-0.065	0.725	1.075	1.165	1.575	1.375	-2.5	-2.91	-0.69	0.21	0.24	0.11	1.89	2.12	0.86	1.14	1.36	1.87	-0.165	0.235	0.335	0.625	0.485	0.535	0.16
YER062C	HOR2	metabolic process*	hydrolase activity*	0	1.5	0.92	-0.58	-0.82	-1.41	-2.25	-2.68	-2.77	0.205	1.395	1.565	0.785	-1.245	-1.785	-1.795	-1.925	-1.025	0.1	0.81	2.29	3.26	2.82	2.69	2.82	2.75	2.29	1.15	0.78	0.19	-0.33	0.14	0.13	0.16	-0.33	-0.78	-0.68	-0.64	-0.42	2.525	2.625	2.445	2.115	2.285	2.055	-0.0378543
YER064C	YER064C	regulation of transcription	molecular_function	0	-0.55	-0.42	-0.19	0.79	1.09	1.3	1.87	2.22	-0.16	-0.91	-1.07	-0.61	0.1	0.39	0.66	0.8	1.04	0.05	-0.22	-0.39	-0.93	-0.33	-0.2	-0.15	-0.24	-0.16	1.09	0.54	0.45	0.24	0.36	0.46	-1.38	-1.19	-1.09	-1.04	-0.82	-0.58	0.14	0.07	0.07	0.16	0.46	0.55	-0.286752
YER092W	IES5	biological_process	molecular_function	0	0.08	-0.04	-0.01	0.19	0.07	-0.03	-0.19	-0.19	-0.225	0.005	-0.145	-0.315	-0.355	-0.225	-0.035	0.125	0.845	0.095	0.175	-0.005	-0.005	-0.205	0.085	0.015	0.065	0.005	0.32	0.79	-0.05	-0.2	0.07	-0.04	-0.64	-0.15	0.43	0.29	0.32	-0.15	-0.08	0.03	0.1	0.11	0.04	0.06	-0.1
YER128W	YER128W	biological_process	molecular_function	0	-0.49	-0.25	-0.35	-0.27	-0.1	-0.14	0.18	-0.1	0.135	-0.455	-0.575	-0.345	-0.675	-0.585	-0.555	-0.525	-0.325	0.37	-0.02	0.12	0.09	0.46	0.58	0.68	0.54	0.44	0.69	0.69	-0.13	-0.27	-0.19	-0.04	-0.47	-0.49	-0.05	0.01	0.03	-0.15	1.295	0.975	1.165	0.845	0.885	0.805	0.138643
YER132C	PMD1	meiosis*	molecular_function	0	-0.74	-0.46	-0.4	0.29	0.38	0.31	0.05	0.43	0.04	-0.18	0.02	0.67	0.61	0.37	0.28	0.16	0.06	0.245	0.115	-0.035	0.235	1.255	1.175	1.325	1.435	1.425	0.22	-0.01	0.36	0.19	0.14	0.03	0.87	0.61	0.1	0.13	0.16	0.21	0.285	0.185	0.035	-0.085	-0.225	-0.025	0.248059
YER137C	YER137C	biological_process	molecular_function*	0	-1.38	-1.22	-0.63	-0.18	-0.06	-0.5	-0.6	0.12	-0.18	-2	-1.54	-0.62	-0.38	-0.88	-0.98	-0.94	-0.87	0.375	-0.375	-0.375	-0.915	0.375	0.425	0.765	0.585	0.345	-0.24	-0.04	-0.66	-0.63	-0.36	-0.21	-1.01	-0.84	-0.02	-0.02	0.05	-0.34	0.98	0.69	0.45	0.6	0.52	0.57	0.06
YER148W	SPT15	transcription*	DNA binding*	0	-1.08	-0.9	-0.74	-0.62	0.26	0.41	0.67	1.44	0.06	-0.73	-0.78	-0.69	-0.96	-0.57	-0.3	-0.3	0.19	0.005	-0.095	-0.225	-0.435	-0.915	-0.845	-0.695	-0.805	-0.515	-0.17	0.09	0.03	-0.14	-0.03	0.07	-0.4	0.02	0.58	0.7	0.64	0.06	-0.545	-0.385	-0.365	-0.515	-0.505	-0.765	-0.929315
YER151C	UBP3	ubiquitin cycle*	hydrolase activity*	0	-0.48	-0.64	-0.69	-0.89	-0.8	-0.79	-0.64	-0.45	0.05	-0.4	-0.24	-0.34	-0.36	-0.49	-0.53	-0.6	-0.64	0.195	0.045	0.025	-0.275	-0.385	-0.495	-0.345	-0.375	-0.275	-0.07	-0.31	0.5	0.4	0.11	0.2	0.5	0.15	-0.44	0.17	0.33	0.09	-0.65	-0.66	-0.47	-0.87	-0.41	-0.69	-0.28
YER174C	GRX4	transport*	electron carrier activity*	0	-0.11	0.43	0.38	0.13	0.2	0.33	0.41	0.17	-0.11	-0.09	0.1	0.93	1.25	1.08	0.9	0.92	1.24	-0.175	0.045	-0.165	-0.145	0.005	-0.095	-0.315	-0.325	-0.085	0.6	0.74	0.2	0.39	0.75	0.78	0.17	0.37	0.76	0.62	0.39	0.64	0.59	0.53	0.76	0.51	0.14	0.17	-0.577669
YFL002C	SPB4	ribosome biogenesis and assembly*	nucleotide binding*	0	-1.18	-0.47	-0.27	-0.35	-0.34	-0.26	-0.59	-0.32	0.11	-0.85	-0.42	-0.46	-0.8	-0.69	-0.68	-0.61	-0.63	0.345	-0.095	-0.295	0.105	0.175	0.145	0.275	0.225	0.355	-0.51	-0.6	-0.29	-0.5	-0.26	-0.14	-0.55	-0.59	-0.34	-0.31	-0.08	-0.25	1.4	0.9	0.68	0.49	0.61	0.58	0.05
YFL021W	GAT1	transcription*	metal ion binding*	0	-1.63	-1.19	-0.26	-1.17	-1.07	-1.73	-1.42	-0.99	0.205	-1.115	-0.875	-0.205	0.695	0.965	0.945	0.915	1.425	0.42	-0.03	-0.43	-0.14	-0.33	-0.37	-0.34	-0.28	-0.09	0.32	0.16	0.99	1.16	0.27	-0.05	2.48	2.12	0.42	0.67	0.53	1.24	-2.885	-2.855	-2.965	-2.845	-2.695	-2.785	0.092612
YFL023W	BUD27	protein folding*	molecular_function*	0	-2.02	-1.32	-0.55	-0.1	0.11	-0.05	-0.19	-0.17	-0.04	-1.56	-1.57	-0.51	-0.03	-0.17	-0.39	-0.38	-0.45	0.265	-0.405	-0.475	-0.635	0.455	0.645	0.815	0.895	0.895	-0.17	-0.24	0.24	0.08	0.13	0.26	0.54	0.12	-0.68	-0.3	0.17	0.12	-0.58	-0.48	-0.36	-0.68	-0.33	-0.79	0.35
YFL050C	ALR2	transport*	magnesium ion binding*	0	0.27	-0.31	-0.41	0.42	0.59	0.74	1.16	1.55	-0.165	0.235	-0.185	-0.135	-0.305	-0.405	-0.295	-0.055	0.165	0.1	-0.22	-0.55	-0.59	-0.38	-0.57	-0.56	-0.49	-0.44	0.3	0.62	0.27	0.36	-0.05	-0.01	0.53	0.33	0.49	0.3	0.32	0.13	-0.955	-0.815	-0.665	-0.665	-0.775	-0.935	-0.01
YFR034C	PHO4	transcription*	DNA binding*	0	-0.95	-0.39	-0.23	-0.42	0.06	0.1	0.18	0.91	-0.2	-1.09	-0.69	-0.73	-0.71	-0.55	-0.66	-0.84	-0.56	-0.085	-0.365	-0.715	-0.445	-0.165	-0.535	-0.555	-0.575	-0.605	-0.4	0.53	0.68	0.73	0.19	0.03	1	0.53	-0.92	-1.04	-0.19	0.29	-1.51	-0.77	-0.62	-0.41	-0.09	-1.54	-0.80861
YFR036W	CDC26	cell cycle*	protein binding*	0	-0.47	-0.11	0.01	-0.06	0.22	-0.04	0.54	0.65	0.11	0.49	0.39	0.63	0.6	0.45	0.4	0.4	0.2	0.24	-0.2	-0.03	0.22	0.13	0.1	0.21	0.24	0.12	-0.74	-0.12	-0.57	-0.23	-0.29	-0.26	-0.6	-0.92	-0.58	-0.52	-0.14	-0.42	-0.22	-0.28	-0.22	-0.17	-0.04	-0.07	-0.581742
YFR038W	YFR038W	biological_process	molecular_function*	0	-1.29	-0.91	-0.63	-0.55	-0.52	-0.72	-0.87	-1.11	0.1	-0.42	-0.23	-0.06	-1.04e-17	-0.2	-0.38	-0.37	-0.54	0.345	0.115	0.105	-0.185	0.075	-0.045	0.185	0.115	0.115	-0.4	-0.29	-0.36	-0.38	-0.28	-0.08	-0.06	-0.42	-0.3	-0.28	-0.16	-0.04	0.87	0.82	0.81	0.78	0.81	0.61	0.129753
YGL043W	DST1	transcription*	metal ion binding*	0	-0.67	-0.46	-0.43	-0.41	-0.11	0.01	0.17	0.13	0.045	-0.495	-0.655	-0.755	-0.775	-0.505	-0.495	-0.575	-0.565	0.2	0.21	0.12	-0.5	-0.62	-0.64	-0.49	-0.65	-0.5	-0.27	-0.15	-0.43	-0.49	-0.23	0.17	-0.55	-0.66	-0.35	-0.36	-0.08	-0.11	-1.135	-0.965	-0.875	-0.825	-0.505	-0.685	-0.52
YGL044C	RNA15	mRNA processing*	nucleotide binding*	0	-0.09	-0.31	-0.5	-0.11	-0.01	0.04	-0.14	-0.19	0.155	0.035	-0.005	-0.085	-0.285	-0.045	0.005	0.105	-0.075	0.18	0.08	0.04	-0.06	0.21	0.14	0.25	0.28	0.14	-0.1	-0.26	0.02	-0.14	0.06	0.14	0.06	-0.05	-0.1	-0.06	0.17	0.03	-0.125	0.035	0.055	-0.045	0.205	-0.275	0.139296
YGL079W	YGL079W	biological_process	molecular_function	0	0.02	-0.04	-0.18	0.02	-0.02	0.04	0.2	-0.01	0.06	0.2	0.2	0.24	0.31	0.41	0.36	0.39	0.28	0.185	0.065	0.015	0.525	0.675	0.855	0.885	0.915	0.995	0.25	0.45	-0.21	-0.24	-0.1	0.06	-0.53	-0.32	0.51	0.34	0.2	-0.15	0.71	0.48	0.39	0.35	0.09	0.25	0.690845
YGL098W	USE1	transport*	SNAP receptor activity	0	0.55	0.17	-0.26	0.1	0.27	0.62	0.5	0.61	-0.17	0.8	0.06	0.25	0.17	0.38	0.29	0.33	0.4	-0.01	0.23	0.07	0.48	0.98	0.81	0.84	0.76	0.56	0	0.14	-0.1	-0.11	0.05	0.19	-0.34	-0.26	0.2	0.28	0.06	-0.1	-0.085	-0.135	-0.035	-0.105	0.035	-0.075	0.392944
YGL122C	NAB2	mRNA polyadenylation*	metal ion binding*	0	0.29	-0.34	-0.45	-0.39	0.08	0.09	0.44	0.49	-0.195	-0.585	-0.765	-1.115	-0.405	-0.545	-0.725	-0.755	-0.385	-0.16	0.03	-0.26	-0.99	-1.06	-0.99	-0.99	-1.03	-0.9	0.13	-0.21	0.2	0.27	0.34	0.38	0.82	0.42	-0.94	-0.63	-0.29	0.25	-1.885	-1.735	-1.525	-1.415	-0.905	-0.955	-0.44
YGL140C	YGL140C	biological_process	molecular_function	0	-0.46	-0.8	-0.77	-1.05	-0.97	-1	-0.92	-1	-0.095	1.145	0.535	0.295	0.015	-0.055	-0.165	-0.175	-0.055	-0.345	-0.315	-0.505	-0.335	-0.175	-0.225	0.105	0.205	0.225	-0.32	-0.2	-0.04	-0.07	-0.07	-0.05	0.95	0.92	0.85	0.38	0.52	0.43	0.16	0.19	0.19	0.4	0.31	0.42	0.63
YGL172W	NUP49	transport*	structural molecule activity	0	-0.12	-0.36	-0.39	-0.61	-0.44	-0.4	-0.23	-0.12	0.07	0.15	-0.09	-0.42	-0.36	-0.43	-0.48	-0.59	-0.48	0.08	0.08	0.07	-0.08	-0.43	-0.35	-0.42	-0.44	-0.48	-0.39	-0.33	-0.26	-0.14	-0.12	-0.11	0.34	0.24	-0.59	-0.52	-0.26	-0.14	-0.89	-0.61	-0.77	-0.91	-0.57	-0.75	-0.980679
YGL174W	BUD13	mRNA processing*	molecular_function	0	-0.21	-0.28	-0.39	0.02	0.44	0.73	0.84	1.25	0.215	1.075	0.485	0.265	0.275	0.785	0.975	0.945	1.245	0.27	0.09	0.01	-0.35	0.2	0.55	0.8	0.95	1.16	0.55	0.47	-0.28	-0.39	-0.09	0.17	0.35	0.46	0.72	0.56	0.76	0.18	0.1	0.13	0.13	-0.18	-0.13	-0.11	0.321879
YGL178W	MPT5	cell wall organization and biogenesis*	RNA binding*	0	0.17	-0.33	-0.29	-0.16	-0.27	-0.9	-1.2	-1.69	-0.325	-0.315	-0.305	-0.355	-0.145	-0.315	-0.265	-0.285	-0.255	-0.04	-0.17	-0.02	-0.11	0.26	0.44	0.43	0.15	0.52	0.32	-0.08	-0.22	-0.19	-0.03	-0.07	0.67	0.01	-0.28	-0.2	0	0.18	1.475	1.225	0.965	1.195	1.005	1.115	-0.299793
YGL184C	STR3	amino acid biosynthetic process*	catalytic activity*	0	-0.33	-1.43	-1.17	-0.45	-0.58	-0.63	-0.76	-0.66	0.005	-0.875	-1.025	0.185	0.745	0.785	0.705	0.865	2.335	0.05	-0.15	-1.63	-1.54	-0.48	-0.3	0.13	0.03	-0.09	0.92	0.31	-0.34	-0.48	-0.23	-0.06	0.43	0.05	-0.28	-0.04	-0.2	0.15	0.125	-0.175	-0.075	-0.235	0.305	0.635	0.844708
YGL186C	TPN1	transport*	nucleobase transmembrane transporter activity*	0	-0.95	-0.69	-0.78	-0.34	-0.2	-0.47	-0.76	-0.74	-0.225	-0.145	-0.185	0.555	0.445	0.345	0.255	0.305	0.055	-0.365	-0.165	-0.765	-0.755	-0.255	-0.415	-0.375	-0.525	-0.475	0.26	0.31	-0.1	-0.23	-0.33	0.04	0.54	0.88	0.53	0.69	0.48	0.6	-1.35	-1.24	-1.2	-0.99	-0.81	-0.5	-0.273
YGL201C	MCM6	transcription*	nucleotide binding*	0	-0.26	-0.44	-0.42	-0.17	0.09	0.15	-0.01	0.31	0.19	0.16	0.03	-0.26	-0.13	-0.01	-0.05	-0.09	-0.02	0.31	0.35	0.16	-0.28	-0.8	-0.8	-0.62	-0.61	-0.48	-0.28	-0.2	-0.06	-0.02	-0.03	0.02	0.51	0.45	0.46	0.28	0.24	0.13	0.935	1.005	0.955	0.945	0.955	1.075	0.0605199
YGL203C	KEX1	proteolysis*	hydrolase activity*	0	-0.68	-0.69	-0.71	-0.95	-1.02	-1.28	-1.65	-1.42	-0.23	0.33	-0.22	-0.21	-0.37	-0.36	-0.35	-0.31	-0.44	-0.385	-0.235	-0.195	-0.165	-0.055	-0.325	-0.135	0.005	-0.015	0.03	-0.35	0.13	-0.08	0.01	-0.07	0.81	0.68	-0.06	-0.18	0.09	0.21	-0.56	-0.69	-0.73	-0.81	-0.59	-0.35	-0.548068
YGL211W	NCS6	response to drug*	molecular_function	0	-0.85	-0.52	-0.5	-0.15	0.07	0.11	0.27	0.02	-0.02	-0.34	-0.66	-0.47	-0.78	-0.68	-0.58	-0.63	-0.74	-0.115	-0.525	-0.685	-0.735	-0.665	-0.875	-0.835	-0.615	-0.745	-0.2	0.04	-0.35	-0.31	-0.26	-0.02	0.16	0.07	-0.46	-0.7	-0.42	-0.36	-1.665	-1.175	-0.945	-1.135	-0.475	-0.965	-0.51
YGL215W	CLG1	cell cycle	cyclin-dependent protein kinase regulator activity	0	-0.35	-0.68	-0.48	-0.25	-0.18	-0.17	-0.07	0.32	-0.15	-0.68	-0.59	-0.64	-0.73	-0.87	-0.81	-0.85	-0.77	0.18	-0.03	-0.25	0.07	0.3	0.15	0.02	-0.38	-0.05	0.17	0.15	0.01	-0.04	-0.06	-0.2	0.19	-0.15	-0.45	-0.52	-0.36	-0.12	0.17	0.39	0.51	0.79	0.38	0.25	-0.24
YGL255W	ZRT1	transport*	zinc ion binding*	0	-1.21	-1.27	-1.58	0.08	1.45	1.69	2.48	4.03	-1.59	-1.72	-2.05	-1.63	-1.47	-1.15	-0.9	-0.8	-0.61	-1.95	-1.97	-2.07	-1.92	-0.84	-1.05	-0.9	-1.08	-0.93	1.4	0.92	-0.16	-1.25	-2.57	-3.06	-2.73	-2.81	-3.43	-3.19	-3.3	-3.21	-3.46	-3.05	-2.57	-1.85	-1.61	-1.5	-0.13
YGR003W	CUL3	cell cycle*	protein binding*	0	-1.02	-0.63	-0.27	-0.01	0.03	-0.16	-0.06	-0.59	0.045	-0.025	0.185	0.365	0.395	0.425	0.265	0.285	0.245	0.24	-0.14	-0.12	0.24	0.62	0.7	0.84	1.03	1.05	0.22	0.26	-0.02	-0.34	-0.07	-0.07	0.37	0.1	0.27	0.31	0.03	0.01	0.655	0.625	0.525	0.415	0.455	0.435	0.81
YGR004W	PEX31	peroxisome organization and biogenesis	molecular_function	0	-0.5	-0.79	-0.88	-0.3	-0.42	-0.08	0.09	0.23	-0.31	-0.21	-0.85	-0.94	-0.96	-0.76	-0.69	-0.64	-0.73	-0.295	-0.525	-0.675	-1.085	-0.945	-0.825	-0.685	-0.655	-0.595	-0.87	-0.73	-0.33	-0.17	-0.22	-0.21	-0.53	-0.56	-0.42	-0.63	-0.44	-0.11	-0.8	-0.81	-0.9	-0.57	-0.52	-0.48	-0.19
YGR058W	PEF1	axial cellular bud site selection	zinc ion binding*	0	-0.15	0.08	-0.13	-0.33	-0.39	-0.39	-0.17	-0.58	0.065	0.075	-0.255	0.085	-0.075	-0.325	-0.485	-0.505	-0.645	0.175	-0.225	-0.335	-0.355	-0.155	-0.195	-0.195	0.015	-0.115	0.03	-0.16	-0.17	0.2	0.11	-0.24	-0.07	-0.19	-0.37	-0.35	-0.28	-0.18	-0.395	-0.285	-0.305	-0.245	-0.115	-0.275	-0.58
YGR072W	UPF3	telomere maintenance*	molecular_function	0	-0.28	-0.23	-0.29	0.45	0.57	0.35	0.4	0.5	0.045	-0.415	-0.205	-0.075	0.275	0.305	0.365	0.395	0.355	0.305	0.085	0.035	-0.135	0.115	0.405	0.515	0.465	0.195	-0.16	-0.29	-0.38	-0.45	-0.27	-0.17	-0.05	-0.09	0.05	0.37	0.15	-0.04	-1.045	-1.255	-1.045	-1.155	-1.015	-1.115	-0.34
YGR079W	YGR079W	biological_process	molecular_function	0	-2.48	-2.57	-1.34	-0.39	0.08	-0.37	-0.39	0.86	-0.035	-2.045	-0.545	0.735	1.455	1.505	1.415	1.245	1.255	0.06	-0.66	-0.11	0.86	1.02	0.93	0.95	0.96	1.08	-0.35	-0.31	-0.36	-0.27	-0.26	0.12	0.45	0.42	-0.56	-0.42	-0.44	0.19	0.76	0.79	0.52	0.55	0.89	0.68	0.0240953
YGR093W	YGR093W	biological_process	molecular_function	0	-1.4	-0.73	-0.62	-0.39	-0.28	-0.46	-0.2	-0.7	0.055	-0.705	-0.625	-0.325	-0.395	-0.385	-0.325	-0.235	-0.325	-0.045	-0.465	-0.645	-0.885	-0.585	-0.265	-0.455	-0.215	-0.575	-0.34	-0.26	-0.4	-0.66	-0.25	-0.12	-0.53	-0.43	-0.29	0.08	-0.16	-0.46	-0.885	-0.975	-0.975	-1.095	-0.955	-0.995	-0.19
YGR095C	RRP46	rRNA processing*	hydrolase activity*	0	-1.2	-1.09	-0.82	0.14	0.21	0.24	0.14	0.11	-0.045	-1.585	-0.805	-0.235	0.105	0.295	0.245	0.215	0.165	0.18	-0.24	-0.46	-0.6	-0.11	0.12	0.22	0.3	0.2	-0.23	-0.16	-0.44	-0.52	-0.13	0.05	-0.31	-0.15	-0.22	-0.26	-0.31	-0.23	-0.295	-0.295	-0.285	-0.365	-0.235	0.025	-0.0459989
YGR096W	TPC1	transport*	binding*	0	-0.4	-0.36	-0.34	0.13	-0.03	-0.06	0.12	0.32	-0.235	-0.715	-0.475	-0.245	0.005	0.095	0.115	0.175	0.295	-0.04	-0.27	-0.35	-0.57	-0.3	-0.13	0	0.14	-0.09	-0.49	-0.65	-0.3	-0.19	0.15	0.17	-0.55	-0.17	-0.86	-0.55	-0.55	0.05	-1.25	-1.26	-1.09	-1	-0.88	-0.26	0.460043
YGR125W	YGR125W	biological_process*	molecular_function*	0	-0.68	-1.11	-1.22	-0.85	-0.98	-1.32	-1.3	-1.53	0.225	1.045	0.415	1.095	1.595	2.185	2.155	2.165	2.225	-0.39	-0.33	-0.81	-0.89	-1.43	-1.41	-1.48	-1.5	-1.46	-0.73	-0.65	-0.49	-0.46	-0.29	-0.42	2.26	1.96	2.13	1.89	1.88	1.46	-1.895	-1.735	-1.665	-1.205	-1.525	-1.825	-0.0968468
YGR129W	SYF2	cell cycle*	RNA splicing factor activity, transesterification mechanism	0	-0.28	0.01	0.54	0.66	0.63	0.56	0.25	0.14	-0.34	-2.05	-0.28	-0.1	-0.92	-1.14	-1.16	-0.93	-0.87	0.05	-0.08	-0.14	0.78	1.52	1.4	1.3	1.32	1.29	0.68	0.73	0.16	-0.16	-0.08	0.16	-0.65	-0.2	0.4	0.28	0.32	-0.23	0.75	0.88	0.79	0.66	0.4	0.06	0.36
YGR155W	CYS4	metabolic process*	catalytic activity*	0	0.35	0.18	-0.85	0.38	0.76	0	-0.21	-0.67	0.21	0.45	-0.45	-0.32	-0.04	-0.17	-0.28	-0.11	0.21	0.09	0.01	-0.28	-0.84	-1.11	-0.9	-0.98	-1.06	-0.93	-0.75	-0.77	-0.36	-0.37	-0.05	0.1	0.29	0.28	-0.22	0.11	0.16	0.41	-0.675	-0.585	-0.515	-0.475	-0.275	-0.245	-0.520774
YGR210C	YGR210C	biological_process	molecular_function*	0	-1.23	-0.6	-0.58	0.18	-0.01	-0.21	-0.54	-1.09	0.065	-1.125	-0.645	-0.095	0.175	0.065	-0.065	0.015	-0.035	0.12	0.13	-0.1	-0.47	0.19	-0.05	-0.14	-0.12	-0.72	-0.2	-0.34	0.05	0.18	0.16	0.22	0.87	0.63	-0.05	-0.04	0.23	0.34	-0.285	-0.255	-0.375	-0.425	-0.305	-0.405	-0.352603
YGR239C	PEX21	protein import into peroxisome matrix*	protein binding	0	-1.25	-0.39	0.81	-0.51	-0.49	-1	-1.16	-0.84	-0.03	0.36	0.03	0.72	0.94	1	0.89	0.88	1.15	-0.055	-0.185	-0.465	-0.395	-0.395	-0.575	-0.655	-0.855	-0.895	1.17	1.31	1.09	0.55	0.21	0.16	0.41	0.08	-0.14	-0.29	-0.12	0.02	-0.19	-0.16	-0.16	-0.18	-0.26	-0.15	-0.747779
YGR251W	YGR251W	rRNA processing	molecular_function	0	-2.4	-1.42	-0.79	-0.1	-0.05	-0.01	-0.05	0.31	-0.175	-2.115	-0.725	0.275	0.665	0.735	0.745	0.785	0.695	0.175	-0.315	-0.425	-0.435	0.235	0.365	0.215	0.245	0.385	0.15	0.05	-0.23	-0.45	-0.12	0.1	0.26	0.11	0.07	0.2	0.04	-0.06	-0.13	-0.03	-0.01	-0.06	0.05	-0.16	0.136212
YGR260W	TNA1	transport*	nicotinamide mononucleotide transmembrane transporter activity	0	-0.5	-0.36	0.08	-0.31	-0.13	-1.06	-0.85	-0.78	-0.59	-1.74	-0.56	-0.44	-0.77	-0.51	-0.51	-0.64	-1.02	-0.475	-0.375	-0.605	0.025	1.075	0.235	-0.235	-0.745	-0.735	-0.51	-0.47	-0.49	-0.65	-0.6	-0.63	-0.93	-1.19	-1.25	-1.19	-1.13	-0.95	-0.64	-0.43	-0.83	-0.63	-0.83	-0.61	0.343472
YGR262C	BUD32	transcription*	nucleotide binding*	0	-0.46	-0.24	-0.27	0.08	0.32	0.63	0.85	1.02	0.06	-0.06	0.08	0.11	0.27	0.42	0.44	0.42	0.38	0.15	0.01	-0.1	-0.37	-0.56	-0.52	-0.77	-0.67	-0.67	-0.44	-0.23	-0.24	-0.27	0.18	0.14	-0.88	-0.53	-0.38	-0.27	0.01	0.19	-0.365	-0.155	0.145	0.205	0.425	0.445	-0.87
YGR280C	PXR1	ribosome biogenesis and assembly*	molecular_function*	0	-2.33	-2.4	-1.13	-0.51	-0.36	-0.15	-0.03	0.37	0.255	-1.535	-1.505	-0.565	-0.105	-0.355	-0.565	-0.295	0.825	0.74	-0.15	-0.16	-0.47	-0.19	0.14	0.44	0.49	-0.23	-0.48	-0.91	-0.27	-0.22	0.02	0.21	-0.85	-0.51	-1.05	-0.64	-0.21	0.08	-1.87	-1.62	-1.2	-1.52	-1.02	-1.5	0.044978
YHL026C	YHL026C	biological_process	molecular_function	0	-1.24	-1.03	-0.81	-0.04	0.17	0.59	0.86	1	-0.285	-1.025	-0.705	-0.275	0.175	0.085	-0.025	-0.055	-0.065	-0.14	-0.47	-0.83	-0.35	0.18	0.27	0.15	0.14	0.21	-0.73	-0.7	-0.13	0.08	0.07	0.14	0.55	0.39	-0.32	-0.22	-0.15	0.44	-0.65	-0.83	-1.22	-1.01	-1.24	-0.82	-0.09
YHL029C	YHL029C	metabolic process*	molecular_function*	0	-0.33	-0.48	-0.37	-0.1	-0.09	-0.08	-0.12	-0.24	0.03	-0.02	-0.26	0.16	0.32	0.3	0.13	0.01	0.05	0.24	-0.1	-0.22	-0.4	-2.78e-17	0.25	0.42	0.42	0.45	0.23	-0.01	0.12	0.27	0.14	0.16	0.67	0.7	0.03	0.07	-0.18	0.52	-0.275	-0.245	-0.335	-0.205	0.065	0.085	0.06
YHR031C	RRM3	DNA replication*	nucleotide binding*	0	-2.04	-0.69	-0.23	-1.27	-0.75	-1.34	-1.32	-1.8	-0.005	-0.195	0.535	0.165	-0.275	-0.055	0.015	0.045	-0.035	0.12	-0.39	-0.11	0.17	-0.42	-0.86	-0.72	-0.94	-0.91	-0.3	-0.35	-0.32	-0.36	-0.38	-0.44	0.36	0.22	0.24	0.05	-0.03	-0.1	0.14	0.3	0.3	0.22	0.16	0.06	-0.329999
YHR040W	BCD1	snoRNA metabolic process	metal ion binding*	0	-1.91	-1.06	-0.47	0.44	0.79	0.97	0.85	1.07	-0.11	-2.92	-1.38	-0.2	0.31	0.6	0.66	0.72	0.6	0.045	-0.615	-0.795	-0.785	0.425	0.515	0.665	0.725	0.805	0	-0.15	-0.12	-0.3	-0.1	-0.03	0.37	-0.11	-1.24	-0.98	-0.53	-0.16	-0.91	-0.65	-0.79	-0.62	-0.5	-0.84	0.0305237
YHR069C	RRP4	rRNA processing*	hydrolase activity*	0	-1.49	-0.78	-0.58	-0.47	-0.55	-0.81	-0.99	-0.99	0.11	-1.85	-0.64	-0.11	-0.31	-0.32	-0.43	-0.46	-0.64	0.165	-0.095	-0.215	-0.525	-0.425	-0.515	-0.535	-0.485	-0.355	-0.12	-0.03	0.12	0.07	0.07	0.17	-0.38	-0.31	-0.04	-0.02	0.1	0.24	-0.79	-0.68	-0.6	-0.7	-0.42	-0.4	0.205491
YHR072W	ERG7	metabolic process*	catalytic activity*	0	-0.86	0.09	0.24	0.11	0.02	-0.21	-0.55	-0.56	0.24	0.66	0.65	0.73	-0.25	-0.11	0.05	0.22	0.18	0.295	0.285	0.025	0.735	0.205	0.195	0.475	0.765	0.295	0.6	0.53	0.6	0.34	0.27	0.39	1.39	1.05	0.47	0.1	0.25	0.28	0.325	0.475	0.335	0.105	0.235	0.285	-0.3
YHR081W	LRP1	telomere maintenance*	molecular_function	0	-2.29	-1.67	-0.83	0.05	0.66	1.03	0.92	1.65	-0.1	-2.37	-1.16	-0.71	-0.42	-0.16	-0.15	0	0.07	0.255	-0.225	-0.535	-0.595	0.005	0.285	0.405	0.205	0.475	-0.03	0.42	0.08	-0.1	-0.24	0.07	-0.88	-0.78	0.47	0.31	0.45	0.06	0.395	0.265	0.225	0.215	0.155	-0.115	-0.02
YHR092C	HXT4	transport*	transporter activity*	0	3.45	1.21	-0.3	-0.59	-0.91	-0.94	-1.21	-1.33	-0.76	-2.03	-1.11	-0.78	-1.42	-1.65	-1.67	-1.74	-0.56	-1.105	-0.855	-0.905	-0.185	1.795	2.475	2.735	2.765	4.185	-2.03	-3.16	-3.25	-2.94	-2.35	0.55	0.96	1.13	1.24	1.7	1.49	1.88	1.29	1.38	1.39	1.85	2.27	2.61	-0.07
YHR134W	WSS1	response to DNA damage stimulus*	molecular_function	0	0.02	-0.27	-0.44	0.36	0.85	1.24	1.13	1.21	-0.13	0.23	-0.39	-0.22	-0.14	0	0.18	0.04	0.19	-0.105	0.025	-0.265	-0.255	0.315	0.355	0.405	0.595	0.245	-0.02	0.16	-0.07	-0.01	0	0.24	-0.58	-0.47	-0.18	0.05	0.07	-0.16	-0.52	-0.61	-0.22	-0.29	-0.07	-0.1	0.15
YHR167W	THP2	transcription*	nucleic acid binding	0	-0.78	-0.86	-1.08	-0.98	-0.67	-0.65	-0.37	0.12	-0.055	-0.625	-0.775	-0.865	-0.585	-0.415	-0.325	-0.345	-0.275	0.1	-0.11	-0.12	-0.84	-0.75	-0.36	-0.48	-0.44	-0.39	-0.38	-0.07	-0.4	-0.5	-0.24	0.11	-0.88	-0.51	0.3	0.17	0.36	-0.07	-0.09	0.08	0.15	0.29	0.51	0.43	-1.26
YHR182W	YHR182W	biological_process*	molecular_function	0	-0.22	-0.1	-0.16	0.25	0.49	0.64	1.25	1.21	-0.055	0.205	-0.005	0.135	0.545	0.645	0.555	0.645	0.585	0.155	0.025	-0.045	-0.065	0.875	0.835	0.775	0.635	0.545	-0.47	-0.39	-0.19	-0.2	-0.35	-0.46	-0.25	-0.46	-0.54	-0.35	-0.3	-0.26	-0.255	-0.415	-0.585	-0.505	-0.505	-0.855	0.0312811
YHR205W	SCH9	protein amino acid phosphorylation*	nucleotide binding*	0	-0.51	-0.68	-0.39	-0.15	0.16	0.2	0.7	1	-0.16	0.35	0.68	0.91	0.87	0.69	0.55	0.5	0.55	-0.09	-0.29	-0.25	-0.2	-0.23	-0.53	-0.63	-0.78	-0.59	0.26	-0.21	0.16	0.4	0.22	0.26	1.66	1.66	0.05	0.13	-0.04	0.75	-0.255	-0.335	-0.765	-0.455	-0.265	-0.305	0.15
YHR206W	SKN7	transcription*	DNA binding*	0	-0.71	-0.82	-0.51	0.12	0.4	0.6	1.06	1.26	-0.06	-0.79	-0.27	-0.05	-0.04	0.06	0	0.1	0.1	-0.005	-0.075	-0.245	-0.335	-0.425	-0.595	-0.505	-0.655	-0.485	0.01	0.09	0.28	0.42	0.1	0.26	0.24	0.3	-0.2	-0.24	-0.15	0.35	-0.83	-0.77	-0.8	-0.65	-0.49	-0.34	0.4
YIL061C	SNP1	nuclear mRNA splicing, via spliceosome	nucleotide binding*	0	-0.61	-0.79	-0.7	-0.61	-0.38	-0.38	-0.09	0.08	-0.13	-0.49	-0.48	-0.43	-0.13	0.1	0.15	0.22	0.22	0.02	-0.19	-0.26	-0.34	-0.23	-0.31	-0.54	-0.38	-0.58	-1.5	-1.27	1.12	0.98	-1.15	-1.53	-0.66	-0.97	-1.75	-1.67	-1.42	-1.35	-1.735	-1.485	-1.495	-1.135	-1.025	-1.125	-0.05
YIL092W	YIL092W	biological_process	molecular_function	0	-0.45	-0.42	-0.39	0.34	0.61	0.62	0.92	0.9	0.035	1.095	-0.015	0.155	0.395	0.555	0.585	0.525	1.055	-0.015	-0.285	-0.695	-0.445	0.215	0.425	0.365	0.485	0.285	0.12	-0.07	0.1	-0.22	-0.43	-0.3	0.17	-0.09	0.19	0.32	0.11	-0.08	-1.35	-1.64	-1.54	-1.57	-1.63	-1.87	0.56
YIL104C	SHQ1	snoRNA metabolic process	molecular_function	0	-1.52	-1.31	-1.12	-0.82	-0.63	-0.74	-0.76	-0.5	-0.035	-2.335	-1.305	-0.735	-0.445	-0.405	-0.475	-0.385	-0.425	0.115	-0.505	-0.665	-1.035	-0.485	-0.355	-0.345	-0.365	-0.485	-0.87	-0.78	-0.62	-0.62	-0.35	-0.04	-1	-1.03	-0.45	-0.25	-0.14	-0.08	-0.55	-0.47	-0.45	-0.4	-0.14	-0.34	0.06
YIL130W	ASG1	biological_process*	molecular_function*	0	-0.54	-0.3	-0.38	0.35	0.48	0.23	0.1	-0.18	0.245	-0.755	-0.295	0.025	-0.105	-0.155	-0.275	-0.455	-0.635	0.295	0.085	-0.175	-0.235	0.145	0.095	0.155	-0.035	0.195	-0.24	0	0.36	0.2	-0.03	-0.05	-0.06	0.1	0.24	0.2	0.18	0.24	-0.015	-0.085	0.035	0.135	-0.045	-0.255	0.39
YIL159W	BNR1	actin filament organization*	actin binding*	0	-1.14	-0.3	-0.37	-0.11	0.03	-0.03	-0.07	0.21	0.06	-0.41	-0.25	-0.35	0.23	0.63	0.66	0.77	1.33	0.205	0.015	0.035	-0.295	-0.295	0.245	0.685	0.715	1.015	-0.05	-0.3	-0.37	-0.29	0.1	-0.18	0.6	0.03	-0.02	0.15	0.07	0	0.745	0.575	0.505	0.775	0.555	0.695	-0.08
YIL161W	YIL161W	biological_process	molecular_function	0	-0.05	0.1	0.05	0.48	0.71	1.07	1.11	1.42	-0.03	-0.1	-0.35	-0.36	-0.54	-0.23	0.01	0.4	0.49	0.06	0.03	-0.11	-0.02	0.13	0.45	0.35	0.56	0.12	0.35	0.42	0.08	-0.06	-0.24	-0.19	0.27	0.6	0.66	0.61	0.28	-0.2	0.485	0.535	0.525	0.145	0.205	-0.125	-0.44
YIL165C	YIL165C	biological_process*	molecular_function*	0	0.21	0.02	-0.56	-1.72	-1.92	-1.97	-2.13	-2.09	0.63	3.31	1.92	2.28	1.31	1.98	2.21	2.41	3.66	-0.57	-1.11e-16	-0.47	-1.06	-1.61	-1.79	-1.97	-1.88	-2.16	0.57	0.72	-0.31	-0.33	0.08	0.2	2.55	2.54	2.16	2.15	2.03	1.83	-2.13	-1.92	-1.75	-1.51	-0.89	-0.66	-0.73
YIR017C	MET28	transcription*	DNA binding*	0	0.64	0.59	-0.32	0.39	-0.15	-0.9	-1.88	-2.83	-0.15	0.14	-0.29	-0.41	-0.02	0.36	0.5	0.67	2.62	0.11	0.24	-0.29	-0.72	-1.33	-1.27	-1.38	-1.26	-1.5	0.09	0.65	-0.24	-0.4	-0.23	-0.2	0.24	0.11	0.02	0.08	0.05	-0.6	-1.445	-1.505	-1.255	-1.395	-0.995	-1.105	0.12408
YIR023W	DAL81	transcription*	metal ion binding*	0	-0.49	-0.26	-0.07	0.27	0.39	0.2	0.16	0.14	0.255	0.645	0.425	0.565	0.665	0.515	0.465	0.425	0.205	0.21	0.21	0.16	0.19	0.43	0.28	0.42	0.48	0.63	0.24	0.01	0.4	0.32	0.14	0.16	1.15	1.05	0.34	0.11	0.41	0.4	-0.335	-0.335	-0.425	-0.535	-0.455	-0.325	-0.392668
YIR028W	DAL4	transport*	nucleobase transmembrane transporter activity*	0	-1.41	-1.49	-1.25	-2.52	-2.31	-2.5	-2.87	-3.04	2.77	5.12	5.7	4.45	3.62	3.65	3.54	3.69	3.07	-0.61	-0.37	-2.05	-1.67	-0.84	-0.77	-1.12	-1.32	-1.76	0.46	0.6	0.3	0.38	0.15	0.16	5.56	5.11	3.83	4.11	3.89	4.45	-3.075	-3.545	-3.645	-3.245	-3.795	-3.355	-0.416835
YJL012C	VTC4	vacuole fusion, non-autophagic*	molecular_function	0	-0.35	-0.64	-1.16	-1.5	-1.27	-1.14	-0.75	-0.74	-0.025	0.405	-0.225	-0.745	-1.145	-1.075	-1.055	-1.145	-1.395	1.265	1.975	2.385	2.905	1.905	1.355	1.255	1.505	1.275	-0.19	-0.08	-0.16	-0.03	-0.16	-0.16	0.85	0.81	0.54	0.32	0.28	0.45	2.185	2.425	2.155	2.085	2.215	1.915	0.0290584
YJL014W	CCT3	protein folding*	nucleotide binding*	0	-0.56	-0.51	-0.59	-1.03	-0.75	-0.79	-0.77	-0.43	0.085	-0.245	-0.405	-0.705	-0.435	-0.215	-0.295	-0.255	-0.475	0.14	0.22	0.16	-0.15	-0.51	-0.61	-0.71	-0.89	-0.95	0.19	0.34	0.29	0.46	0.36	0.37	0.24	0.03	-0.24	0.05	0.02	0.36	0.19	0.11	0.12	0.1	0.39	0.24	-0.322758
YJL024C	APS3	transport*	molecular_function	0	-0.15	-0.12	-0.25	-0.13	-0.23	-0.39	-0.18	-0.12	-0.12	-0.1	-0.16	-0.81	-0.94	-1.17	-1.22	-1.3	-1.28	0.11	-0.2	-0.11	-0.29	-0.44	-0.38	-0.28	-0.64	-0.37	-0.33	-0.19	-0.13	-0.15	0.03	0.15	-1.42	-1.57	-0.56	-0.25	-0.07	0.09	-0.36	-0.39	-0.47	-0.31	-0.23	-0.46	-0.164391
YJL041W	NSP1	transport*	structural molecule activity*	0	-0.52	-0.25	-0.08	0.19	0.29	0.24	0.21	-0.38	0.17	-0.34	-0.22	-0.3	-0.38	-0.18	-0.18	-0.11	-0.17	0.26	0.08	0.2	0.17	0.28	0.19	0.29	0.37	0.31	0.44	0.16	0.48	0.26	0.16	0.06	0.94	0.7	-0.3	-0.47	-0.01	-0.01	-0.73	-0.59	-0.79	-0.98	-0.6	-0.77	0.502267
YJL071W	ARG2	telomere maintenance*	acetylglutamate kinase activity*	0	-0.25	-0.2	0.25	-0.19	-0.09	-0.11	-0.04	-0.06	-0.08	-1.34	-1.29	-0.64	-0.29	-0.12	-0.12	-0.07	0.05	-0.04	-0.04	-0.24	-0.86	-0.37	-0.32	-0.28	-0.37	-0.5	0.54	0.5	-0.25	-0.3	-0.07	0.22	-0.53	-0.56	-0.53	-0.35	-0.3	0.15	0	0.1	0.2	0.11	0.58	0.46	0.151647
YJL072C	PSF2	DNA replication*	molecular_function	0	-0.25	-0.66	-0.6	-0.49	-0.37	0.14	0.3	0.26	-0.075	-0.325	-1.005	-0.835	-0.635	-0.545	-0.535	-0.535	-0.295	0.14	-0.04	-0.05	-1.07	-0.93	-0.73	-0.61	-0.52	-0.57	0.18	0.29	-0.4	-0.48	0.07	0.27	-1.44	-0.97	0.08	0.15	0.17	0.21	0.045	0.115	0.545	0.615	0.865	0.965	-0.195507
YJL098W	SAP185	cell cycle*	protein serine/threonine phosphatase activity	0	-2.41	-1.27	-0.52	-0.2	0.21	-0.01	-0.01	0.19	0.06	-2.1	-0.59	0.1	0.26	0.37	0.32	0.28	0.1	0.175	-0.365	-0.465	-0.625	-0.365	-0.205	-0.065	0.065	-0.035	-0.17	-0.08	-0.05	-0.2	-0.14	-0.2	0.52	0.48	0.49	0.42	0.32	0.14	-0.025	-0.085	-0.165	-0.145	-0.095	-0.255	0.152909
YJL101C	GSH1	response to drug*	ligase activity*	0	0.75	0.18	-0.83	0.43	0.1	-0.05	-0.42	-0.73	0.005	-0.015	0.005	0.365	0.665	0.515	0.465	0.605	1.085	0.18	0.58	0.14	0.38	0.68	0.77	0.76	0.84	0.7	-0.26	-0.43	-0.21	-0.12	-0.03	-0.07	0.2	0.09	0.11	-0.01	-0.22	0.11	0.375	0.385	0.425	0.305	0.265	0.385	0.694174
YJL110C	GZF3	transcription*	metal ion binding*	0	-0.4	-0.47	-0.51	-0.37	-0.14	-0.14	0.17	0.35	-0.08	0.54	-0.05	0.6	0.46	0.23	0.08	0.07	0.38	-0.05	0.01	-0.39	-0.22	-0.17	-0.59	-0.63	-0.51	-0.54	-0.42	-0.29	0.23	0.23	-0.11	-0.13	0.71	0.58	0.43	0.44	0.37	0.42	0.705	0.745	0.735	0.535	0.715	0.635	-0.151658
YJL129C	TRK1	transport*	potassium ion binding*	0	-0.62	-0.48	-0.34	-0.45	-0.52	-0.42	-0.14	-0.02	-0.39	-0.49	1.11e-16	0.08	0.26	0.24	0.09	0.05	-0.13	-0.19	-0.37	-0.39	0.21	0.14	0.23	0.15	0.2	0	-0.2	-0.26	-0.06	-0.09	-0.15	-0.17	0.16	0.03	0	-0.07	-0.05	-0.01	-1	-0.92	-0.92	-0.82	-0.98	-0.92	-0.1
YJL139C	YUR1	protein amino acid N-linked glycosylation*	transferase activity*	0	0.15	0.02	-0.7	-0.48	-0.24	-0.22	-0.2	-0.46	-0.58	-0.41	-0.91	-1.03	-0.69	-0.47	-0.52	-0.56	-0.67	-0.585	-0.435	-0.465	-0.645	-0.565	-0.755	-0.865	-0.995	-1.055	0.24	0.27	0.06	0.02	-0.04	0.08	-0.34	-0.46	-0.26	-0.32	-0.21	-0.11	-0.99	-0.97	-0.92	-0.84	-0.85	-0.85	0.351984
YJL162C	JJJ2	biological_process*	molecular_function*	0	-1.27	-0.61	-0.49	-0.12	0	0.14	0.47	0.35	-0.125	-0.545	-0.535	0.065	0.795	0.815	0.705	0.705	0.695	0.095	-0.425	-0.615	-0.475	0.615	0.995	1.005	1.255	0.945	-0.15	-0.03	-0.24	-0.56	-0.31	-0.2	0.05	-0.03	0.54	0.28	0.12	-0.34	-0.605	-0.735	-0.665	-0.665	-0.895	-1.205	0.47
YJL197W	UBP12	biological_process*	hydrolase activity*	0	-0.31	-0.5	-0.7	-0.4	-0.29	-0.29	-0.49	-0.47	0.055	-0.515	-0.575	-0.145	-0.155	-0.105	-0.255	-0.255	-0.335	0.25	0.13	0.01	0.06	0.67	0.44	0.53	0.86	0.69	-0.24	-0.39	-0.2	-0.11	-0.07	0.02	0.13	-0.06	0.08	0	0.01	-0.06	0.8	0.65	0.72	0.57	0.64	0.74	-0.123781
YJL203W	PRP21	mRNA processing*	RNA binding	0	-0.04	-0.37	-0.51	-0.3	-0.16	0.2	0.2	0.68	-0.035	0.125	-0.325	-0.455	-0.625	-0.445	-0.525	-0.435	-0.535	-0.025	0.025	-0.025	-0.375	-0.565	-0.675	-0.565	-0.665	-0.585	-0.18	-0.13	-0.05	-0.22	-0.2	0.12	-0.5	-0.52	0.08	0.05	0.32	-0.09	-0.165	0.045	0.015	-0.045	-0.055	-0.405	-0.403516
YJR014W	TMA22	biological_process*	RNA binding*	0	-0.39	-0.14	-0.26	-0.11	-0.15	-0.01	0.01	-0.06	0.23	-0.42	-0.49	-0.23	-0.53	-0.39	-0.25	-0.04	0	0.38	0.26	0.1	-0.18	-0.53	-0.55	-0.43	-0.32	-0.57	0.31	0.27	-0.16	-0.27	-0.15	0.16	-0.32	-0.05	0.43	0.62	0.14	0	-0.505	-0.415	-0.195	-0.505	-0.195	-0.515	-0.510496
YJR024C	YJR024C	biological_process	molecular_function*	0	-0.73	-0.3	-0.2	-0.27	-0.41	-0.73	-1.21	-1.67	0.085	-0.055	0.095	0.305	0.295	0.315	0.305	0.225	-0.065	0.26	0.12	0.15	0.08	-0.28	-0.18	-0.14	-0.02	-0.12	-0.07	0.16	-0.16	0.03	0.25	0.25	-0.33	-0.07	-0.32	0.03	-0.27	0.28	0.295	0.295	0.555	0.645	0.705	0.635	-0.644706
YJR055W	HIT1	telomere maintenance	molecular_function*	0	-1.07	-0.25	-0.28	0.08	0.63	0.71	0.86	1.73	0.02	-1.4	-0.51	0.55	0.94	0.93	0.84	0.68	1	0.37	-0.28	-0.25	-0.14	0.5	0.99	0.96	0.93	0.98	-0.2	-0.15	-0.04	-0.39	-0.08	0.09	-1.11	-0.87	0.65	0.46	0.35	0.03	0.515	-0.045	0.345	0.545	0.225	0.245	0.412617
YJR067C	YAE1	biological_process	molecular_function	0	-0.43	-0.58	-0.54	0.43	0.63	1.08	1.04	1.58	-0.285	-1.375	-1.055	-0.765	-0.245	-0.165	-0.185	-0.285	-0.205	0.155	-0.195	-0.225	-0.885	0.345	0.775	0.545	0.415	0.645	-0.25	-0.02	-0.26	-0.28	0.06	0.22	-1.81	-1.14	-0.14	0.26	0.39	0.09	0.275	0.105	0.255	0.495	0.425	0.615	-0.677263
YJR072C	NPA3	biological_process	nucleotide binding*	0	-1.26	-0.42	-0.11	-0.15	0	-0.23	-0.34	0.41	0.01	-2.51	-1.06	-0.58	-0.11	0.01	0.14	0.29	0.04	0.28	-0.09	0.02	-0.29	-0.26	-0.32	-0.17	-0.21	-0.3	0.43	0	0.07	0.06	0.12	0.26	0.7	0.23	-0.64	-0.39	-0.04	0.04	-0.065	0.045	-0.035	-0.335	0.195	-0.045	-0.279818
YJR097W	JJJ3	peptidyl-diphthamide biosynthetic process from peptidyl-histidine	molecular_function*	0	-1.27	-1.43	-0.87	-0.25	-0.13	-0.06	-0.71	0.26	-0.17	-0.58	0.27	0.14	0.77	0.44	0.53	0.19	-0.16	0.145	-0.245	-0.175	-0.495	-0.465	-0.735	-0.705	-1.245	-1.265	-0.23	0.24	-0.13	-0.37	-0.01	0.18	-2.02	-1.3	0.21	0.3	0.21	0.18	0.62	0.58	0.96	1.33	1.09	1.33	-0.36
YJR111C	YJR111C	biological_process	molecular_function	0	-0.57	-0.77	-0.25	-0.59	-0.68	-1.45	-1.25	-1.13	-0.15	-0.92	-0.96	-0.38	-0.04	0.06	0.02	0.04	0.5	-0.04	-0.15	-0.16	-0.43	0.06	-0.05	-0.25	-0.49	-0.45	0.88	0.7	0.48	0.04	-0.06	0.16	-0.79	-0.58	-0.67	-0.56	-0.49	0.21	-0.56	-0.64	-0.67	-0.73	-0.3	-0.1	-0.0049355
YJR129C	YJR129C	biological_process	S-adenosylmethionine-dependent methyltransferase activity	0	-1.86	-1.1	-0.57	-0.17	-0.29	-0.53	-0.29	-0.16	-0.365	-1.395	-1.055	-0.715	-0.705	-0.605	-0.495	-0.335	-0.385	-0.12	-0.55	-0.49	-0.5	-0.56	-0.57	-0.67	-0.69	-0.62	-0.08	-0.19	0.16	0.22	0.3	0.37	0.37	-0.03	-0.79	-0.2	-0.26	0.25	-0.985	-0.895	-0.775	-0.795	-0.525	-0.665	0.307662
YJR132W	NMD5	intracellular protein transport*	binding*	0	-1.05	-0.92	-0.86	-0.51	-0.32	-0.45	-0.58	-0.6	-0.035	-1.915	-1.465	-1.055	-0.725	-0.555	-0.635	-0.505	-0.495	0.335	0.045	-0.175	-0.555	0.065	0.205	0.205	0.075	0.155	-0.17	-0.45	-0.04	0.07	0.14	0.3	0.04	-0.43	-0.3	-0.48	-0.3	0.17	-0.55	-0.52	-0.39	-0.12	0.09	0.09	-0.12
YJR137C	ECM17	electron transport*	metal ion binding*	0	0.57	0.18	-1.01	-0.07	-0.21	-1.14	-2.08	-3.02	0.225	-0.595	-1.455	-0.795	0.195	0.725	1.005	1.385	2.105	0.055	0.395	0.025	-1.205	-2.005	-1.755	-1.345	-1.135	-1.065	0.57	0.43	0.18	0.18	0.36	0.5	1.04	0.73	0.47	0.15	0.17	0.3	-0.015	0.035	-0.195	-0.275	-0.115	0.335	-0.206557
YKL019W	RAM2	peptide pheromone maturation*	transferase activity*	0	0.04	0.04	-0.13	-0.35	-0.87	-0.9	-0.78	-1.56	0.06	0.59	0.06	0.16	-0.41	-0.45	-0.47	-0.26	-0.33	0.145	0.135	0.085	0.085	-0.215	-0.325	-0.415	-0.305	-0.395	-0.19	0.01	0.06	0.26	0.21	0.08	0.16	0.44	-0.8	-0.53	-0.48	0.34	-0.12	-0.09	-0.25	-0.2	0.06	0.09	-0.342361
YKL054C	DEF1	telomere maintenance*	molecular_function	0	0.28	-0.13	-0.21	-0.25	0.03	0.11	0.28	0.36	0.115	-0.575	-0.425	-0.505	0.445	0.065	-0.055	-0.205	-0.285	0.235	0.145	0.075	-0.555	-0.935	-0.865	-0.815	-0.885	-0.815	-0.04	-0.25	0.44	0.56	0.51	0.3	0.71	0.47	-0.82	-0.77	-0.07	0.26	-1.495	-1.415	-1.135	-1.105	-0.975	-1.285	-0.457742
YKL072W	STB6	biological_process	molecular_function	0	-2.44	-2.98	-2.36	-0.88	-0.38	-0.54	-0.79	-0.59	-0.12	-0.28	-0.07	0.12	0.27	0.24	0.19	0	0.2	0.14	-0.09	-0.2	0.16	0.6	0.69	0.7	0.66	0.75	-0.9	-0.95	-1.46	-1.45	-0.98	-0.34	0.22	0.06	0.17	0.18	-0.15	-0.39	0.75	0.63	0.48	0.32	0.24	0.11	0.16104
YKL079W	SMY1	exocytosis*	nucleotide binding*	0	0.71	0.49	0.06	0.45	0.48	0.25	0.35	0.61	0.115	0.105	0.245	0.225	0.745	0.705	0.685	0.745	0.685	0.24	0.29	0.29	0.35	0.42	0.84	0.65	0.57	0.61	0.16	0.12	0.31	0.22	0.19	0.15	0.06	0.02	-0.05	0.23	0.05	0	-0.2	-0.36	-0.43	-0.48	-0.57	-0.51	-0.427955
YKL082C	RRP14	ribosome biogenesis and assembly*	molecular_function	0	-2.6	-1.6	-0.98	0.2	0.67	0.91	0.58	1.45	-0.095	-4.245	-1.795	-0.545	-0.365	-0.155	-0.235	0.165	-0.035	0.145	-0.175	-0.425	-0.375	0.615	0.645	0.905	1.195	1.155	0.03	-0.12	-0.09	-0.17	-0.23	0.09	-0.41	-0.42	-0.36	0.2	0.16	-0.2	0.875	0.685	0.635	0.275	0.465	-0.305	0.1
YKL114C	APN1	telomere maintenance*	metal ion binding*	0	-0.41	-0.43	-0.3	-0.48	-0.42	-0.37	-0.44	-0.14	-0.025	-0.435	-0.755	-0.795	-0.585	-0.385	-0.375	-0.245	-0.015	0.1	0.28	0.29	-0.23	-0.46	-0.65	-0.77	-0.74	-1.03	-0.04	-0.09	0.02	-0.12	0.07	0.29	-0.8	-0.62	-0.06	0.14	0.14	-0.03	-0.105	-0.095	0.075	-0.045	0.185	-0.045	-0.61
YKL139W	CTK1	telomere maintenance*	nucleotide binding*	0	-0.3	-0.25	-0.62	0.03	0.36	0.71	0.98	1.14	-0.025	-1.045	-0.905	-0.395	0.015	0.065	-0.025	-0.045	0.145	0.135	-0.165	-0.315	-0.455	-0.005	0.155	0.305	0.555	0.395	-0.31	-0.52	-0.54	-0.52	-0.5	-0.35	0.32	0.15	0.28	0.16	0.02	-0.52	0.12	0.22	0.18	0.03	0.13	-0.14	0.02
YKL156W	RPS27A	translation	metal ion binding*	0	-1.56	-2.29	-1.64	-0.89	-0.13	0.36	0.4	0.59	-0.52	-2.65	-2.14	-1.38	-0.05	0.44	0.48	0.5	0.96	-0.205	-0.345	-0.705	-3.025	-1.935	-1.015	-0.755	-0.585	-0.295	-0.56	-0.64	-0.73	-0.69	-0.16	-0.05	-0.95	-0.7	-0.06	0.16	0.18	0.24	-2.49	-2.51	-2.12	-1.49	-1.62	-1.2	-0.337472
YKL159C	RCN1	calcium-mediated signaling	calcium-dependent protein serine/threonine phosphatase regulator activity	0	0.77	0.29	-0.15	0.45	0.49	0.87	1	1.17	0.445	1.405	0.555	0.095	0.255	0.305	0.455	0.455	0.495	-0.015	0.205	0.235	0.205	0.625	0.775	0.695	0.695	0.795	0.47	0.01	0.15	0.17	0.23	0.2	-0.3	-0.58	-0.33	-0.23	-0.06	0.1	-0.32	-0.3	-0.27	-0.38	-0.39	-0.18	0.354502
YKR025W	RPC37	transcription*	transferase activity*	0	-1.81	-1.57	-1.15	-0.88	-0.61	-0.57	-0.54	-0.01	-0.06	-1.65	-0.81	-0.58	-0.84	-0.77	-0.75	-0.78	-0.66	0.095	-0.305	-0.435	-0.915	-0.995	-1.025	-0.695	-0.815	-0.595	0.11	0.05	-0.38	-0.39	-0.12	0.03	0.27	0.16	-0.21	-0.31	-0.05	0.03	1.215	1.345	1.265	1.195	1.415	1.385	-0.0779397
YKR036C	CAF4	regulation of transcription, DNA-dependent*	protein binding	0	-0.82	-0.6	-0.17	0.2	0.42	0.33	0.44	0.27	-0.13	-0.79	-0.65	-0.15	-0.19	-0.02	1.04e-17	0.07	0.01	-0.03	-0.35	-0.47	-0.46	0.11	0.06	3.47e-18	0.07	-0.07	0.6	0.34	0.32	0.08	-0.15	0.08	-0.01	-0.16	-0.34	-0.31	-0.36	-0.23	-0.55	-0.65	-0.55	-0.76	-0.5	-0.62	0.219061
YKR039W	GAP1	transport*	amino acid transmembrane transporter activity*	0	-1.53	-0.39	1.24	-0.64	0.84	-0.51	-0.17	0.54	-0.115	0.395	0.345	1.425	2.235	2.535	2.755	2.465	2.435	-0.215	-0.045	-0.085	-0.055	-1.165	-1.705	-1.665	-1.805	-0.895	1.11	0.84	1.73	1	0.18	-0.02	6.64	6.64	5.29	5.41	4.6	4.43	-4.205	-4.155	-4.335	-4.225	-4.265	-4.265	0.425184
YKR045C	YKR045C	biological_process	molecular_function	0	-0.09	-0.28	-0.15	0.54	0.54	0.7	0.33	1.83	-0.165	-0.565	0.065	-0.245	0.395	0.135	0.315	0.075	-0.125	0.02	-0.01	-1.11e-16	0.1	-0.26	-0.45	-0.65	-0.91	-0.71	-0.34	-0.39	-0.32	0	-0.02	0.11	-0.41	-0.49	-0.5	-0.5	-0.4	0.02	-0.395	-0.145	-0.155	0.075	0.065	0.285	-0.306799
YKR048C	NAP1	nucleosome assembly*	DNA binding*	0	0.58	0.59	0.27	0.66	1.02	1.15	1.27	1.39	0.07	0.24	0.22	0.22	0.16	0.49	0.66	0.68	0.63	-0.035	-0.175	-0.045	0.485	0.385	0.165	0.225	0.255	0.175	0.19	-0.09	0	0.08	0.02	-0.08	1.15	0.41	-1.21	-1.17	-0.59	-0.14	-1.215	-0.825	-1.025	-1.145	-0.555	-0.805	-0.234322
YKR061W	KTR2	protein amino acid N-linked glycosylation*	transferase activity*	0	0	-0.01	-0.84	-1.09	-0.98	-1.16	-1.02	-1.06	-0.17	-0.26	-0.37	-0.22	-0.36	-0.15	0.02	0.1	0.26	-0.52	-0.55	-0.34	-0.36	-0.1	0.02	0.06	0.31	0.73	0.98	1.02	1.11	0.81	0.14	0.04	0.9	0.59	0.52	0.04	0.17	0.1	0.345	0.345	0.085	0.035	-0.345	-0.655	-0.673603
YKR062W	TFA2	transcription*	general RNA polymerase II transcription factor activity*	0	0.33	0.19	-0.13	0.37	0.94	1.37	1.56	2.12	0.075	0.665	0.165	0.075	-0.325	-0.205	-0.215	-0.235	0.125	0.035	0.205	0.145	0.195	0.415	0.515	0.595	0.595	0.635	0.2	0.14	-0.11	-0.05	-0.04	0	-0.09	-0.19	0.34	0.16	0.12	-0.03	0.335	0.105	0.275	0.225	0.215	0.115	-0.252956
YKR063C	LAS1	establishment of cell polarity*	molecular_function	0	-1.61	-0.91	-0.51	0.32	0.5	0.59	0.36	0.72	-0.05	-1.87	-0.7	-0.07	0.36	0.13	0.03	-0.05	-0.34	0.265	-0.285	-0.315	0.005	0.695	0.795	0.975	0.925	0.685	0.06	0	-0.19	-0.44	-0.37	-0.17	-0.02	-0.1	0.46	0.24	0.18	-0.35	0.89	0.81	0.82	0.84	0.57	0.44	0.436258
YKR071C	DRE2	biological_process	molecular_function	0	-0.47	-0.86	-0.95	-0.35	-0.24	-0.09	0.22	0.52	0.05	-0.77	-0.96	-0.9	-0.58	-0.55	-0.8	-0.83	-0.36	0.175	0.145	-0.185	-0.845	-0.935	-1.235	-1.325	-1.485	-1.435	-0.34	-0.24	-0.4	-0.11	0.15	0.27	-1.13	-1.08	-0.56	-0.34	0.12	0.23	0.055	0.035	0.065	0.215	0.665	0.755	-0.515974
YKR072C	SIS2	G1/S transition of mitotic cell cycle*	phosphopantothenoylcysteine decarboxylase activity*	0	-0.36	-0.57	-0.24	0.47	0.75	0.91	1	1.23	-0.005	-1.515	-0.775	0.035	0.405	0.395	0.305	0.205	0.305	0.18	0.16	-0.01	-0.05	1.07	1.1	1.17	0.89	0.99	0.16	-0.16	0.14	0.11	0.01	0.03	0.54	-0.04	-1.19	-1.19	-0.73	-0.28	-0.895	-0.785	-0.935	-0.855	-0.625	-0.855	0.587133
YKR084C	HBS1	translation*	molecular_function*	0	-0.05	-0.32	-0.53	-0.52	-0.56	-0.5	-0.44	-0.79	0.02	-0.04	-0.43	-0.52	-0.57	-0.6	-0.61	-0.66	-0.8	-0.005	-0.025	0.005	-0.225	-0.455	-0.735	-0.685	-0.495	-0.825	0.1	-0.17	0.07	0.26	0.16	0.22	0.18	-0.01	-0.4	-0.32	-0.29	0.02	0.375	0.275	-0.045	-0.135	0.135	0.365	0.280106
YKR099W	BAS1	transcription*	DNA binding*	0	-1.59	-1.07	-0.56	-0.11	-0.12	-0.21	-0.04	0.16	0.165	-1.335	-0.265	0.395	0.615	0.645	0.695	0.535	0.775	0.2	-0.38	-0.46	-0.48	-0.12	0.12	-0.13	-0.07	-0.06	0.26	0.24	-0.21	-0.4	-0.14	-0.08	-0.07	0.06	-0.05	-0.17	-0.11	-0.13	-0.61	-0.7	-0.77	-0.93	-0.82	-0.74	0.197751
YLL004W	ORC3	DNA replication*	DNA binding*	0	-1.27	-0.74	-0.77	-1.1	-0.44	-0.62	-0.59	-0.37	-0.015	-0.325	-0.025	-0.345	-0.265	0.025	0.025	-0.045	-0.055	-0.015	-0.275	-0.215	-0.605	-0.945	-0.855	-0.895	-1.045	-0.665	-0.61	-0.42	-0.23	-0.31	-0.23	-0.14	-0.74	-0.74	0.16	0.22	0.06	0.07	-0.22	-0.22	-0.27	-0.25	-0.02	0.06	-0.537458
YLL010C	PSR1	response to stress	hydrolase activity*	0	0.23	-0.16	-0.3	0.05	-0.06	0.14	0.41	0.5	-0.075	0.415	0.085	-0.005	-0.145	-0.435	-0.515	-0.455	-0.245	-0.105	-0.145	-0.265	-0.335	-0.465	-0.495	-0.515	-0.615	-0.475	0.25	-0.04	0.54	0.45	0.29	-0.1	0.19	0.22	0.07	0.08	0.27	0.63	-0.37	-0.17	-0.08	0.14	0.23	-0.04	-0.224688
YLL012W	YEH1	lipid metabolic process*	hydrolase activity*	0	-0.65	-0.32	-1.13	-0.57	-0.52	-0.76	-0.8	-0.62	-0.14	0.5	0.51	0.62	-0.36	-0.06	0.2	0.18	0.13	-0.43	-0.46	-0.6	-0.48	-1.06	-0.81	-0.72	-0.44	-0.39	-0.4	-0.39	-0.58	-0.58	-0.14	-0.05	0.58	0.65	0.02	0.18	0.09	0.26	1.08	1.27	1.19	1.23	1.41	1.57	-0.243335
YLL018C-A	COX19	metal ion transport*	copper ion binding*	0	0.87	1.06	0.68	0.55	0.67	0.66	0.55	0.86	-0.175	-0.065	0.235	1.005	0.645	0.585	0.635	0.695	0.895	0.025	-0.275	-0.475	0.015	0.405	0.235	0.315	0.345	0.375	-0.19	-0.2	0.45	0.53	0.02	-0.2	0.41	0.2	-0.86	-1.1	-0.78	-0.33	-0.725	-0.515	-0.105	-0.235	-0.005	-0.185	0.500123
YLL033W	YLL033W	sporulation*	molecular_function	0	-1.31	-0.82	-0.43	0.32	0.48	0.84	1.14	0.79	-0.035	-0.695	-0.445	-0.045	-0.655	-0.345	-0.345	-0.385	-0.505	0.2	-0.2	-0.22	-0.26	0.23	0.24	0.34	0.41	0.43	0.1	0.22	0.12	-0.01	0.06	0.1	-0.76	-0.04	0.78	0.75	0.4	0.21	0.62	0.49	0.59	0.45	0.33	0.61	0.114205
YLL036C	PRP19	response to DNA damage stimulus*	ubiquitin-protein ligase activity*	0	-0.1	-0.4	-0.45	-0.41	-0.4	-0.45	-0.4	-0.33	-0.07	-0.45	-0.44	-0.38	-0.25	-0.23	-0.22	-0.3	-0.29	-0.005	-0.005	-0.065	-0.495	-0.465	-0.465	-0.535	-0.505	-0.545	-0.41	-0.43	0.05	0.15	0.2	0.25	0.02	0.02	-0.61	-0.33	-0.17	0.41	-0.225	-0.135	-0.235	-0.185	0.085	-0.015	-0.701724
YLL038C	ENT4	endocytosis*	clathrin binding	0	-0.31	-0.55	-0.41	-0.59	-0.47	-0.71	-0.88	-0.12	-0.57	-1.25	-0.55	-0.64	-0.63	-0.48	-0.32	-0.45	-0.39	-0.245	-0.425	-0.635	-0.665	-0.815	-0.715	-0.815	-1.185	-0.565	0.2	0.25	0.79	0.81	0.23	0.41	0.58	0.35	-0.77	-0.55	0.14	0.52	0.63	0.98	1.15	1.42	1.69	0.87	0.02
YLL048C	YBT1	transport*	nucleotide binding*	0	-0.94	-0.64	-0.39	0	0.15	0.13	0.34	-0.24	-0.45	-0.49	-0.37	0.02	0.27	0.05	-0.04	-0.07	-0.13	-0.31	-0.39	-0.49	-0.22	0.58	0.6	0.62	0.5	0.54	0.06	0.13	-0.28	-0.3	-0.33	-0.32	-0.16	-0.48	-0.4	-0.46	-0.32	-0.34	-0.165	-0.265	-0.345	-0.285	-0.585	-0.455	1.14189
YLL051C	FRE6	transport*	oxidoreductase activity*	0	-0.25	-0.24	-0.28	0.02	0.16	0.07	0.35	0.21	-0.5	-0.42	-0.42	-0.5	-0.69	-0.95	-0.92	-0.76	-0.27	-0.55	-0.69	-0.71	-0.7	-0.11	-0.2	-0.34	-0.6	-0.62	-0.59	-0.69	-0.21	-0.11	-0.76	-1.04	-1.28	-1.03	-1.14	-0.94	-0.87	-0.83	-2.305	-2.085	-2.005	-1.135	-0.885	-0.685	0.579255
YLL053C	YLL053C	biological_process*	molecular_function*	0	-1.31	-0.52	-0.44	-0.81	-0.44	-0.21	0.15	0.43	-0.535	-1.045	-0.755	-0.485	-0.805	-0.775	-0.675	-0.625	-0.345	-0.195	-0.645	-0.565	1.675	0.315	0.215	0.525	0.315	0.475	-0.32	0.14	-0.12	0.06	-0.72	-1.67	-0.44	-1.06	-2.11	-2.04	-2.69	-1.99	3.58	3.86	3.53	3.45	3.05	2.72	-0.146
YLL055W	YCT1	cysteine transport	ion transmembrane transporter activity*	0	0.7	-0.02	-0.47	0.81	0.2	-0.77	-1.1	-0.97	-0.26	0.23	0.67	1.01	1.43	1.23	1.4	2.05	2.47	-1.06	-0.16	-1.23	-0.38	-0.82	-1.51	-1.62	-1.56	-1.98	-0.03	-0.43	-0.46	-0.5	-0.1	-0.12	1.4	1.21	0.7	0.81	0.95	0.97	-0.13	-0.31	-0.77	-0.83	-0.79	-0.41	0.381334
YLR014C	PPR1	transcription*	metal ion binding*	0	-1.84	-1.15	-0.66	-0.2	0.19	0.01	0.19	0.13	-0.18	-2.32	-1.26	-0.51	-0.16	-0.24	-0.29	-0.36	-0.44	0.06	-0.6	-0.55	-0.05	0.31	0.21	0.23	0.23	0.17	-0.33	-0.16	-0.33	-0.73	-0.37	-0.25	-0.56	-0.78	-0.11	-0.45	-0.31	-0.36	-0.3	-0.09	-0.11	0.19	0.06	-0.23	0.07
YLR015W	BRE2	transcription*	transcription regulator activity*	0	-0.98	-0.52	0.04	0.36	0.78	1.11	1.1	1.55	-0.055	-1.255	-0.435	-0.025	0.535	0.575	0.455	0.555	0.555	0.275	-0.315	-0.195	-0.275	0.355	0.705	0.805	0.715	0.635	0.11	-0.15	-0.35	-0.44	-0.13	0.15	0.1	-0.35	-0.09	-0.23	-0.09	-0.07	0.295	0.155	0.285	0.125	0.105	0.145	-0.0559448
YLR016C	PML1	mRNA processing*	molecular_function	0	0.1	-0.15	-0.49	0.26	0.57	0.73	0.71	0.86	-0.165	0.015	-0.155	-0.325	-0.295	-0.265	-0.245	-0.215	0.105	0.195	0.265	0.175	0.155	0.215	0.195	0.205	0.105	0.355	0.14	0.43	0.04	0.06	0.26	0.3	-0.55	-0.5	0.16	-0.03	0.07	0.16	-0.69	-0.45	-0.31	0.04	-0.11	-0.37	-0.142417
YLR051C	FCF2	rRNA processing*	molecular_function	0	-1.45	-1.24	-0.68	-0.36	-0.13	0.11	0.17	0.74	-0.12	-1.89	-1.25	-0.8	-0.67	-0.71	-0.7	-0.6	-0.59	0.265	-0.135	-0.275	-0.575	-0.625	-0.535	-0.615	-0.665	-0.595	-0.1	0.09	-0.16	-0.31	-0.08	-0.02	-0.79	-0.18	0.42	0.71	0.44	0	0.145	0.085	0.265	0.245	0.275	0.085	-0.0944345
YLR052W	IES3	transcription*	molecular_function	0	0.07	-0.06	0.03	0.05	-0.09	-0.2	-0.04	-0.12	0.02	-0.34	-0.16	-0.13	-0.31	-0.58	-0.52	-0.48	-0.62	0.13	0.11	-0.11	-0.4	-0.62	-0.68	-0.78	-0.89	-0.93	-0.54	-0.43	-0.19	-0.18	-0.07	-0.06	-0.66	-0.47	0.09	-0.03	0.06	-0.01	-0.245	-0.355	-0.175	-0.085	-0.175	-0.085	0.198001
YLR057W	YLR057W	biological_process*	molecular_function*	0	-0.83	-0.21	-0.12	-0.45	-0.58	-1.06	-1.4	-1.32	-0.29	-1.55	-0.9	-0.54	-0.42	-0.47	-0.55	-0.64	-0.68	-0.19	-0.37	-0.41	-0.54	-0.29	-0.38	-0.35	-0.33	-0.3	-0.42	-0.52	-0.23	-0.21	-0.33	-0.31	-0.41	-0.85	-0.53	-0.6	-0.39	-0.31	0.17	0.1	0.03	0.05	-0.06	-0.02	-0.03
YLR086W	SMC4	cell cycle*	nucleotide binding*	0	-0.68	-0.19	-0.17	0.07	0.27	0.16	0.17	0.04	0.005	0.085	0.035	-0.065	0.115	0.085	-0.015	-0.065	-0.005	0.31	0.2	0.16	0.29	1.03	1.33	1.52	1.36	1.6	0.13	-0.06	0.02	-0.04	-0.07	-0.07	0.82	0.39	-0.03	0.22	0.21	-0.04	0.485	0.625	0.535	0.445	0.505	0.275	1.3553
YLR105C	SEN2	tRNA processing*	hydrolase activity*	0	-0.18	-0.07	-0.45	-0.05	0.18	0.3	0.24	0.27	-0.185	-0.285	-0.375	-0.095	-0.005	0.295	0.275	0.145	0.105	-0.18	-0.25	-0.36	-0.42	-0.02	0.24	0.3	0.21	0.39	-0.21	-0.12	-0.51	-0.43	-0.21	0.04	-0.36	-0.56	-0.11	-0.29	-0.1	-0.22	-0.35	-0.34	-0.36	-0.36	-0.41	-0.3	-0.795774
YLR106C	MDN1	rRNA processing*	nucleotide binding*	0	-3.18	-1.77	-1.13	-0.44	-0.49	-0.91	-0.86	-0.99	0.075	-3.055	-1.675	-0.705	-0.455	-0.155	-0.145	-0.065	-0.115	0.86	0.49	-0.08	-0.45	8.33e-17	0.51	1.01	1.04	1.18	-0.06	-0.07	0.29	0.21	0.22	0.21	0.57	0.3	-0.24	-0.38	-0.17	0.08	-0.375	-0.285	-0.325	-0.315	-0.285	-0.435	-0.169515
YLR116W	MSL5	mRNA processing*	metal ion binding*	0	0.31	0.11	0.04	1.06	1.15	1.37	1.71	1.46	0.005	-0.195	0.085	0.145	-0.185	-0.335	-0.375	-0.275	-0.085	0.095	-0.155	-0.135	0.155	0.445	0.325	0.125	0.125	0.015	-0.03	-0.51	0.01	0.12	-0.12	-0.38	1.01	0.77	-0.54	-0.73	-0.75	-0.23	-0.97	-0.82	-1	-0.8	-0.77	-0.49	0.551112
YLR138W	NHA1	transport*	antiporter activity*	0	-0.4	-0.65	-0.68	-0.17	-0.04	-0.02	-0.11	0.74	-0.17	1.11	0.41	0.46	0.45	0.5	0.58	0.51	0.47	-0.345	-0.165	-0.195	0.005	0.435	0.455	0.685	0.715	0.725	0.01	-0.01	-0.07	-0.08	-0.01	0.1	1.1	0.26	0.25	-0.14	0.24	-0.04	0.665	0.615	0.515	0.745	0.495	0.495	0.278239
YLR147C	SMD3	mRNA processing*	RNA binding*	0	-0.03	-0.27	-0.3	-0.1	-0.2	-0.34	-0.55	-0.15	-0.125	0.035	0.125	-0.045	0.095	0.265	0.275	0.215	-0.055	0.22	0.11	0.06	0.17	0.26	0.63	0.45	0.34	0.53	0.41	0.54	0.03	-0.17	0	0	-0.12	0.28	1.19	0.76	0.55	0.11	0.755	0.395	0.575	0.685	0.405	0.515	-0.06
YLR172C	DPH5	metabolic process*	transferase activity*	0	-1.51	-0.78	-0.31	-0.06	0.01	-0.06	-0.31	-0.21	0.07	-2.16	-1.25	-0.62	-0.36	-0.08	0.07	0.08	-0.22	0.145	-0.085	-0.365	-0.635	-0.825	-0.775	-0.845	-1.025	-0.955	-0.39	0.06	0.32	0.25	0.32	0.33	-0.89	-0.65	-0.26	-0.12	0.06	0.32	-0.56	-0.41	-0.35	-0.2	-0.02	-0.34	0.0305036
YLR176C	RFX1	regulation of transcription, DNA-dependent*	DNA binding*	0	0.53	-0.14	-0.12	0.16	0.64	0.84	1.39	2.01	0.125	0.535	0.205	-0.025	0.365	0.315	0.325	0.145	0.165	0.285	0.255	0.185	-0.115	-0.105	-0.015	-0.055	-0.035	0.405	-0.37	-0.11	-0.29	-0.24	0.18	-0.25	-0.28	-0.18	0.35	0.17	0.18	0.18	0.105	0.035	0.075	0.155	0.095	0.275	-0.718862
YLR187W	SKG3	biological_process	molecular_function	0	-0.28	-0.41	-0.26	-0.12	-0.01	-0.04	0.4	0.24	-0.135	-0.335	-0.235	-0.395	0.055	0.125	0.065	0.005	0.125	-0.075	-0.275	-0.245	-0.535	-0.465	-0.255	-0.285	-0.275	0.015	-0.17	-0.59	-0.06	0.07	0.08	-0.17	0.37	0.16	-0.43	-0.66	-0.46	0.03	-0.66	-0.55	-0.56	-0.38	-0.17	0.08	0.55391
YLR223C	IFH1	transcription*	transcription factor activity*	0	-1.28	-0.77	-0.7	0.22	0.24	0.28	0.38	0.63	-0.03	-1.66	-0.46	0.34	0.16	0.17	0.08	0.14	0.17	0.14	-0.31	-0.24	0.14	0.4	0.41	0.28	0.39	0.36	0	-0.21	0.03	-0.08	0.06	0.05	-0.14	-0.02	0.1	0.42	0.16	-0.02	0.88	0.51	0.39	0.48	0.27	0.26	0.11134
YLR224W	YLR224W	ubiquitin cycle*	protein binding	0	-0.01	-0.68	-1.16	-0.43	0.05	0.58	0.74	1.24	0.215	0.765	0.765	0.965	0.525	0.365	0.295	0.345	0.375	0.18	0.17	-0.1	0.19	0.37	0.19	0.19	0.11	0.33	-0.34	-0.39	-0.47	-0.38	-0.17	0.06	0.33	0.22	0.17	-0.08	-0.19	0.12	0.775	0.785	0.655	0.685	0.705	0.535	-0.0434799
YLR237W	THI7	transport*	nucleobase transmembrane transporter activity*	0	-0.64	-0.09	0.25	0.98	0.24	-0.42	-0.61	-0.88	-0.28	-0.67	-0.14	1.11	1.32	0.41	0.03	0.03	-0.25	-0.27	-0.38	-0.45	0.01	0.51	-0.13	-0.44	-0.79	-0.76	0.2	-0.08	-0.43	-0.55	-0.2	-0.23	0.24	0.01	-1.13	-0.9	-0.99	-0.36	2.47	2.22	1.23	1.54	1.03	1.27	0.42434
YLR244C	MAP1	proteolysis	hydrolase activity*	0	-1.27	-1.07	-1.03	-1.07	-0.85	-0.95	-0.64	-0.49	0.04	-0.19	-0.41	-0.56	-0.81	-0.68	-0.6	-0.57	-0.52	0.25	-0.09	-0.09	-0.36	-0.37	-0.36	-0.51	-0.41	-0.29	-0.4	-0.78	-0.45	-0.23	-0.07	0.06	-0.21	-0.04	-0.79	-0.61	-0.49	0.01	-0.345	-0.195	0.015	0.015	0.385	0.585	-0.141303
YLR245C	CDD1	pyrimidine salvage*	hydrolase activity*	0	0.11	-0.29	-0.43	-0.24	-0.16	-0.18	0.09	0.46	-0.19	0.79	0.87	0.23	0.3	0.38	0.52	0.61	0.68	-0.14	-0.3	-0.01	0.48	0.3	0.42	0.43	-0.18	0.29	-0.54	-0.54	-0.47	-0.18	0.05	0.11	-0.88	-0.09	0.16	0.5	0.43	0.5	0.355	0.495	0.515	0.875	0.735	1.145	0.202029
YLR287C-A	RPS30A	translation	structural constituent of ribosome	0	-0.84	-1.53	-1.51	-0.24	0.36	0.89	0.94	1.45	-0.285	-2.425	-2.195	-1.805	-0.205	0.255	0.395	0.265	0.615	0.24	-0.04	-0.35	-2.48	-1.77	-1	-0.93	-1.06	-0.84	-0.77	-0.01	0.04	-0.2	0.23	0.16	-1.97	-1.45	0.2	0.27	0.56	0.34	-1.23	-1.46	-0.95	-0.31	-0.62	-0.37	-0.26
YLR316C	TAD3	tRNA processing*	hydrolase activity*	0	-1.23	-1.02	-0.63	-0.04	0.39	0.05	-0.21	-0.13	-0.115	-1.795	-1.225	-0.825	-0.515	-0.105	-0.045	0.105	0.085	0.13	-0.02	-0.2	-0.61	-0.36	-0.3	-0.2	-0.31	-0.07	-0.12	-0.1	-0.45	-0.31	-0.04	0.18	-0.56	-0.69	-0.47	-0.39	0.08	0.11	-0.62	-0.54	-0.39	-0.38	-0.24	-0.19	-0.328746
YLR318W	EST2	telomere maintenance*	transferase activity*	0	-0.89	-0.59	-0.44	0.67	0.81	0.96	1.22	0.85	-0.16	-1.1	-0.95	-0.28	0.53	1.17	1.18	1.17	1.21	0.06	-0.12	-0.28	-0.63	0.37	0.86	1.38	1.64	1.78	0.22	0.5	0	-0.18	0.06	0.2	-0.15	-0.05	0.81	0.64	0.49	0.12	-0.025	-0.315	-0.445	-0.265	-0.155	-0.535	0.26
YLR321C	SFH1	transcription*	DNA-dependent ATPase activity	0	-0.49	-0.52	-0.48	-0.61	-0.61	-0.78	-0.77	-0.72	-0.04	-0.81	-0.48	-0.63	-0.57	-0.49	-0.53	-0.54	-0.68	0.125	-0.045	-0.085	-0.435	-0.595	-0.805	-0.645	-0.905	-0.745	-0.42	-0.28	-0.07	-0.02	-0.05	0.06	-0.14	-0.39	-0.2	-0.19	0.17	-0.05	1.095	1.185	1.035	1.225	1.195	0.995	-0.17
YLR323C	CWC24	biological_process*	molecular_function*	0	-1.24	-0.86	-0.2	0.15	0.55	0.68	0.85	1.06	-0.055	-0.365	-0.035	0.775	1.035	0.975	0.935	0.945	0.865	0.095	-0.305	-0.265	-0.005	0.585	0.815	1.035	1.315	0.975	0.31	0.15	-0.3	-0.37	-0.41	-0.11	0.35	0.05	0.02	-0.3	-0.12	-0.38	-0.15	-0.18	-0.21	-0.43	-0.25	-0.47	0.395252
YLR335W	NUP2	transport*	structural molecule activity	0	-1.2	-0.83	-0.52	-0.59	-0.23	-0.12	0.13	0.42	-0.045	-0.605	-0.375	-0.505	-0.325	-0.195	-0.125	-0.075	-0.015	0.13	-0.07	0.03	-0.36	-0.35	-0.28	-0.16	-0.02	-0.11	0.32	-0.13	0.19	0.23	0.25	0.13	0.8	0.51	-0.53	-0.48	-0.16	0.12	-0.775	-0.625	-0.735	-1.045	-0.615	-0.415	-0.400962
YLR336C	SGD1	RNA metabolic process*	molecular_function	0	-2.26	-1.72	-1.04	-0.48	-0.23	-0.18	-0.13	0.37	0.095	-2.615	-1.355	-0.485	-0.115	-0.065	-0.155	-0.205	0.025	0.47	-0.1	-0.3	-0.58	0.09	0.25	0.45	0.51	0.59	-0.27	-0.16	0.04	-0.24	-0.07	-0.13	-0.36	-0.23	0.45	0.31	0.27	0.13	0.02	0.04	0.09	0.14	0.16	0.33	0.287811
YLR347C	KAP95	transport*	binding*	0	-0.24	-0.54	-0.62	-0.29	-0.41	-0.41	-0.28	-0.86	0.01	-0.48	-0.44	-0.45	0.08	-0.09	-0.22	-0.3	-0.65	0.105	0.105	-0.045	-0.525	-0.665	-0.795	-0.815	-0.755	-0.885	-0.4	-0.72	-0.36	0.1	-0.06	-0.09	0.52	0.19	-0.3	-0.61	-0.29	0.18	-0.885	-0.645	-0.715	-0.545	-0.365	-0.135	0.399789
YLR357W	RSC2	transcription*	DNA binding*	0	-0.52	-0.55	-0.47	-0.13	0	0.01	0.23	0.72	-0.01	-0.45	-0.36	-0.63	-0.25	-0.25	-0.28	-0.3	-0.08	0.2	0.06	0.1	-0.27	-0.27	-0.17	0.02	-0.23	0.06	-0.47	-0.39	0.1	0.06	0.11	-0.01	0.43	0.09	-0.69	-0.54	-0.32	-0.02	-0.195	0.005	0.005	-0.065	0.235	-0.115	-0.82
YLR375W	STP3	biological_process	molecular_function*	0	-0.13	-0.35	-0.31	0.03	0.04	0.11	0.4	0.57	0.085	0.325	0.065	0.505	0.695	0.345	0.335	0.225	0.885	0.145	-0.015	-0.055	0.225	1.205	1.385	1.105	1.365	0.975	0.35	0.21	-0.02	0.3	-0.04	-0.09	0.82	0.89	-0.08	-0.14	-0.7	0.03	-0.775	-0.895	-1.005	-0.845	-0.875	-0.795	-1.03717
YLR380W	CSR1	transport*	phosphatidylinositol transporter activity	0	-1	-0.81	-0.13	-0.65	-0.63	-0.83	-0.44	-0.4	0.025	-0.005	-0.275	-0.795	-0.545	-0.385	-0.285	-0.205	-0.225	0.035	-0.105	0.255	-0.025	-0.245	-0.135	-0.235	-0.125	-0.185	0.56	0	0.43	0.48	0.24	0.27	0.94	0.9	-0.49	-0.54	-0.36	0.35	-1.73	-1.68	-1.95	-1.93	-1.67	-1.38	-0.19
YLR384C	IKI3	transport*	molecular_function	0	-1.78	-1.13	-0.85	-0.42	-0.03	-0.32	-0.61	-0.45	0.04	-1.57	-1.09	-0.58	-0.4	-0.39	-0.4	-0.33	-0.36	0.38	0.1	-0.1	-0.27	0.3	0.37	0.42	0.65	0.64	0.21	0.01	0.08	0.17	0.14	0.25	0.57	0.35	0.09	-0.21	-0.1	0.08	0.41	0.5	0.35	0.35	0.37	0.59	0.27
YLR398C	SKI2	mRNA catabolic process*	nucleotide binding*	0	-0.38	-0.36	-0.25	-0.46	-0.72	-1.28	-1.49	-1.53	0.1	0.14	0.04	0	0.25	0.17	0.14	0.07	-0.02	0.345	0.405	0.555	0.425	0.495	0.645	0.705	0.715	0.715	0.31	0.25	0.35	0.25	0.14	-0.01	0.68	0.59	0.39	0.14	0.13	0.1	0.615	0.765	0.735	0.705	0.505	0.375	0.0595587
YLR403W	SFP1	ribosome biogenesis and assembly*	metal ion binding*	0	-0.07	-0.31	-0.42	0.25	0.41	0.43	0.82	0.81	0.045	-0.025	0.175	0.525	0.625	0.255	0.115	-0.035	0.105	0.195	0.075	-0.115	0.025	0.695	0.945	0.815	0.615	0.825	-0.14	-0.07	-0.12	-0.15	0.1	0.11	0.47	0.17	-0.42	-0.26	-0.3	0.27	-0.075	-0.195	-0.225	0.055	0.205	0.065	0.0623114
YLR407W	YLR407W	biological_process	molecular_function	0	-1.39	-0.8	-0.28	0.53	0.8	0.82	1.05	1.32	-0.425	-1.365	-0.625	-0.245	-0.905	-0.715	-0.595	-0.675	-0.715	-0.82	-1	-1.43	-1.6	-1.54	-1.76	-1.73	-1.8	-1.99	-0.25	0.09	-0.13	-0.32	-0.33	-0.51	-0.33	-0.23	-0.15	-0.61	-0.47	-0.44	-1.475	-1.615	-1.795	-1.835	-1.345	-1.465	-0.215926
YLR418C	CDC73	transcription*	RNA polymerase II transcription elongation factor activity	0	0.47	0.45	0.19	0.04	-0.03	0	-0.2	-0.58	0.235	0.295	0.395	0.105	-0.305	-0.315	-0.345	-0.455	-0.695	0.19	0.27	0.19	0.18	-0.22	-0.47	-0.41	-0.55	-0.73	-0.27	0.03	0.21	0.22	0.2	0.25	-0.47	-0.19	0.17	0.27	0.35	0.47	-0.465	-0.305	-0.115	-0.105	0.045	0.055	-0.63
YLR430W	SEN1	rRNA processing*	nucleotide binding*	0	-0.44	-0.14	0.09	0.79	0.89	0.87	1.11	1.12	-0.08	-0.84	0.04	0.38	0.84	0.88	0.91	0.9	0.73	0.195	0.035	0.015	-0.025	0.545	0.655	0.825	0.525	0.945	-0.32	-0.19	0.03	-0.01	0.11	0.21	0.64	0.06	-0.58	-0.6	-0.15	0.22	-0.33	-0.28	-0.4	-0.16	-0.18	-0.22	0.17
YLR443W	ECM7	cell wall organization and biogenesis	molecular_function*	0	-0.25	-0.29	-0.44	0.12	0.41	0.88	1.14	1.13	-0.445	-0.535	-0.865	-0.725	-0.955	-0.775	-0.725	-0.555	-0.635	-0.86	-0.85	-1.1	-1.52	-1.32	-1.5	-1.32	-1.49	-1.33	0.01	0	-0.28	-0.08	-0.04	0.09	-0.2	-0.13	-0.2	-0.27	-0.15	0.11	-0.83	-0.91	-0.86	-0.63	-0.48	-0.37	-0.4
YLR451W	LEU3	transcription*	metal ion binding*	0	-0.47	-0.51	-0.03	0.6	0.49	0.77	0.98	0.97	-0.08	-0.87	-0.47	0.1	0.46	0.5	0.46	0.48	0.66	0.165	-0.045	-0.205	-0.655	0.045	0.295	0.395	0.415	0.365	0.36	0.12	-0.09	-0.09	-0.04	-0.13	0.57	0.57	0.15	-0.07	-0.11	-0.08	-0.16	-0.11	-0.14	-0.11	-0.26	-0.28	0.44
YLR455W	YLR455W	response to drug	molecular_function	0	-0.5	-0.43	-0.59	-0.67	-0.52	-0.26	0.17	0.16	0.135	0.215	0.195	-0.115	0.545	0.405	0.275	0.285	0.305	0.25	-0.04	0.09	-0.36	-0.65	-0.24	-0.34	-0.26	-0.46	-0.7	-0.57	-0.77	-0.52	-0.28	-0.25	-0.08	-0.19	0.41	0.27	0.12	-0.02	-0.94	-0.64	-0.37	-0.19	-0.29	-0.64	-0.933499
YLR462W	YLR462W	biological_process	molecular_function	0	-0.58	-0.37	-0.22	0.11	0.74	0.36	0.01	-0.1	-0.515	0.065	-0.055	-0.985	-0.745	-0.225	0.015	0.035	0.145	-0.43	-0.14	-0.05	0.74	-0.52	-0.48	-0.61	-0.95	-0.97	0.1	0.39	0.1	-0.01	0.12	0.18	0.59	0.37	0.39	0.21	-0.05	-0.07	1.01	0.93	0.36	0.33	0.17	3.47e-18	-0.25
YML005W	TRM12	tRNA processing*	transferase activity*	0	-0.76	-0.42	0.3	0.33	0.35	0.44	0.45	0.54	0.01	-0.32	-0.41	0.04	-0.11	0.06	-0.11	0.04	0.1	0.02	-0.31	-0.69	-0.55	-0.41	-0.73	-0.61	-0.74	-0.73	0.55	0.6	0.27	0.09	0.14	0.17	-0.68	-0.44	0.28	0.15	0.18	0.11	0.285	-0.065	-0.275	-0.355	-0.195	-0.135	0.57
YML011C	RAD33	response to DNA damage stimulus*	molecular_function	0	-0.37	-0.52	-0.5	-0.65	-0.52	-0.58	-0.1	-0.26	0	0.61	0.17	0.03	-0.02	0.14	0.21	0.31	0.38	0.1	0.11	0.06	0.02	0.21	0.51	0.29	0.4	0.52	0.13	0.33	0.03	0.08	0.04	-0.04	-0.97	-0.65	0.27	0.36	0.18	0.1	0.44	0.34	0.34	0.42	0.08	0.57	-1.09782
YML015C	TAF11	transcription*	general RNA polymerase II transcription factor activity*	0	-0.33	-0.31	-0.23	-0.16	-0.48	-0.88	-0.94	-1.55	0.035	-0.435	-0.275	-0.265	-0.375	-0.305	-0.205	-0.235	-0.395	0.025	-0.075	-0.235	-0.525	-0.555	-0.375	-0.205	-0.325	-0.395	-0.2	0.04	-0.28	-0.32	-0.22	-0.09	-0.24	-0.37	-0.05	0.1	0.09	-0.08	-0.925	-0.835	-0.655	-0.695	-0.645	-0.845	0.00633958
YML021C	UNG1	metabolic process*	hydrolase activity*	0	-0.71	-0.84	-0.8	-1.11	-0.83	-0.65	-0.59	-0.56	0.055	0.305	-0.455	-0.815	-0.675	-0.545	-0.425	-0.365	-0.175	-0.12	0.12	0.37	-0.27	-0.62	-0.43	-0.35	-0.33	-0.25	-0.64	-0.27	-0.58	-0.42	-0.07	0.19	-0.06	-0.15	-0.12	-0.17	0.23	0.21	-0.44	-0.39	-0.09	-0.24	0.29	0.35	-0.511802
YML023C	NSE5	response to DNA damage stimulus*	molecular_function	0	-0.18	-0.31	-0.08	0.25	-0.1	-0.21	-0.37	-0.45	0.01	-0.48	-0.48	-0.04	0.15	-0.21	-0.27	-0.22	-0.22	0.055	-0.125	-0.065	-0.355	0.255	-0.005	-0.205	-0.065	-0.215	-0.32	-0.15	-0.11	-0.02	0.24	0.16	-0.6	-0.15	0.49	0.28	0.26	0.21	-0.15	-0.16	-0.08	0.08	-0.09	0.51	0.32
YML046W	PRP39	mRNA processing*	RNA splicing factor activity, transesterification mechanism*	0	-0.67	-0.71	-0.92	-0.6	-0.29	-0.01	0.4	0.15	-0.025	-0.755	-0.955	-0.895	-0.875	-0.755	-0.865	-0.875	-0.865	0.21	0.05	-0.13	-0.73	-0.8	-0.57	-0.63	-0.66	-0.53	-0.66	-0.38	-0.39	-0.28	-0.18	-0.03	-1.03	-0.63	0.18	0.26	0.17	-0.05	-0.65	-0.5	-0.44	-0.12	-0.21	-0.19	-0.31
YML062C	MFT1	transcription*	nucleic acid binding	0	0.08	-0.03	-0.05	0.19	0.12	0.23	-0.06	0.52	0.195	0.595	0.425	0.445	0.455	0.405	0.205	0.515	0.325	0.4	0.52	0.45	0.3	0.45	0.51	0.63	0.63	0.42	0.08	-0.18	0.39	0.33	0.12	0.22	0.61	0.52	0.31	0.67	0.59	0.43	-0.4	-0.53	-0.6	-0.79	-0.68	-1	0.328603
YML067C	ERV41	transport*	molecular_function	0	-0.28	-0.37	-0.57	-0.55	-0.39	-0.42	-0.52	-0.54	-0.475	-0.065	-0.155	-0.255	-0.655	-0.355	-0.305	-0.465	-0.775	-0.585	-0.605	-0.655	-0.455	-0.915	-1.085	-1.115	-1.145	-0.845	-0.08	0.1	-0.01	-0.15	-0.24	-0.01	-0.22	-0.14	0.81	0.52	0.22	0.04	-0.67	-0.74	-0.65	-0.58	-0.75	-0.78	0.394843
YML071C	COG8	transport*	molecular_function	0	-0.13	-0.08	-0.04	0.1	0.12	0.06	0.14	0.19	0.25	0.61	0.12	0.15	0.49	0.61	0.55	0.7	0.5	0.32	0.25	0.25	-0.27	-0.14	-0.06	0.29	0.06	-0.1	-0.07	0.01	-0.39	-0.38	-0.24	0	0.28	0.26	0.1	0.47	0.16	-0.07	0.28	0.19	0.14	0	0.01	-0.65	0.348487
YML074C	FPR3	protein folding*	isomerase activity*	0	-0.3	-0.23	-0.12	-0.81	-0.82	-1.27	-1.49	-1.54	0.2	-0.42	-0.26	-0.17	-0.49	-0.58	-0.4	-0.17	-0.14	0.425	0.555	0.595	0.665	-0.125	-0.425	-0.485	-0.235	-0.555	0.37	0.08	0.53	0.6	0.28	0.6	0.5	0.35	-0.38	-0.03	-0.12	0.19	-1.115	-0.995	-1.035	-1.355	-1.045	-1.215	-0.5643
YML081W	YML081W	biological_process	molecular_function*	0	-0.97	-0.58	-0.49	0.1	0.37	0.53	0.44	1.19	-0.11	-0.29	-0.26	-0.05	0.04	0.21	0.13	-0.05	0.01	-0.03	-0.16	-0.32	-0.33	0.11	0.26	0.43	0.46	0.74	0.02	-0.04	0.19	0.15	0.08	0	0.69	0.53	0.48	0.17	-0.01	0.27	0.235	0.195	0.065	0.095	0.065	0.255	-0.204358
YML082W	YML082W	amino acid biosynthetic process*	transferase activity*	0	-1.04	-0.84	-0.46	0.02	0.32	0.25	0.43	0.61	-0.075	-3.085	-1.385	-0.395	-0.015	-0.105	-0.185	-0.165	-0.145	0.14	-0.26	-0.47	-0.78	-0.46	-0.54	-0.46	-0.32	-0.38	-0.4	-0.61	-0.15	-0.03	0.13	0.21	-0.04	-0.21	-0.6	-0.48	-0.35	0.06	-0.395	-0.335	-0.315	-0.155	0.055	0.115	-0.07
YML099C	ARG81	transcription*	metal ion binding*	0	-0.53	-0.47	-0.22	-0.13	0.07	-0.13	-0.17	-0.52	0.295	2.115	0.435	0.715	0.765	0.955	0.975	0.965	1.175	0.16	0.07	-0.08	-0.16	0.24	0.31	0.3	0.27	0.28	0.38	0.2	0.13	-0.04	0.06	-0.04	0.89	0.67	0.62	0.48	0.54	0.55	-0.81	-1.02	-0.97	-0.89	-0.84	-0.74	0.213761
YML113W	DAT1	negative regulation of transcription from RNA polymerase II promoter	DNA binding*	0	-1.93	-1.25	-0.46	0.13	0.29	0.18	0.38	0.82	-0.04	-2.82	-1.69	-0.92	-0.58	-0.45	-0.43	-0.42	-0.34	0.125	-0.355	-0.425	-0.935	-0.435	-0.365	-0.295	-0.305	-0.335	-0.17	-0.3	-0.16	0.03	0.08	0.11	0.32	0.15	-0.68	-0.87	-0.34	0.04	-1.67	-1.42	-1.27	-1.29	-0.99	-0.99	0.0436745
YML127W	RSC9	transcription*	DNA-dependent ATPase activity*	0	-0.17	-0.5	-0.55	-0.62	-0.35	-0.29	-0.44	-0.58	0.12	0.16	0.17	0.17	0.25	0.28	0.27	0.29	0.06	0.045	0.065	0.235	0.135	0.125	-0.015	0.025	0.135	-0.135	-0.19	-0.42	-0.07	0.09	0.11	0.23	0.36	0.48	-0.48	-0.11	-0.31	0.36	-0.775	-0.735	-0.675	-0.675	-0.185	0.365	-0.799328
YMR005W	TAF4	transcription*	RNA polymerase II transcription factor activity*	0	-0.48	-0.42	-0.29	-0.42	-0.14	-0.05	0.03	0.01	0.08	-0.04	-0.35	-0.27	-0.36	-0.29	-0.32	-0.23	-0.2	0.14	0.15	-5.55e-17	-0.16	-0.18	-0.17	-0.18	-0.11	-0.19	-0.22	-0.33	-0.13	-0.01	-0.11	-0.05	-0.2	-0.25	-0.35	-0.26	-0.27	-0.1	-0.53	-0.38	-0.4	-0.35	-0.28	-0.84	-0.75
YMR016C	SOK2	transcription*	DNA binding*	0	-0.96	-0.23	-0.38	1.05	1.68	1.42	1.39	2.29	-0.08	-0.63	-0.33	0.11	0.92	0.9	0.81	0.74	0.82	0.045	0.165	0.065	-0.725	0.355	0.665	0.685	0.375	0.825	0.09	0.02	0.01	0.03	0.38	0.28	0.64	0.16	-0.73	-1.01	-0.57	-0.09	-0.395	-0.705	-1.005	-0.815	-0.655	-0.445	-0.56107
YMR039C	SUB1	transcription*	DNA binding*	0	-0.01	-0.25	-0.8	-0.39	-0.4	-0.39	-0.16	0.44	0.085	0.555	-0.125	-0.175	-0.275	-0.265	-0.435	-0.115	-0.245	0.24	0.27	0.62	1.22	1.1	0.71	0.73	0.71	0.48	-0.03	-0.38	-0.48	-0.44	-0.34	-0.33	0.67	0.28	-0.1	-0.07	-0.11	-0.31	0.985	1.015	0.935	0.495	0.755	0.345	-0.830445
YMR042W	ARG80	transcription*	DNA binding*	0	-1.61	-1.12	-0.37	0.36	0.84	0.79	1.15	1.49	-0.2	-2.03	-1.69	-0.87	-0.96	-0.67	-0.58	-0.49	-0.33	-0.115	-0.575	-0.945	-1.255	-1.545	-2.275	-2.285	-2.275	-2.065	0.37	0.08	-0.3	-0.29	-0.63	-0.33	0.64	0.51	-0.55	-1.08	-0.86	-0.32	-2.185	-1.865	-1.615	-1.575	-1.135	-1.195	-0.856641
YMR055C	BUB2	cell cycle*	GTPase activator activity*	0	-1.1	-0.75	-0.4	-0.42	-0.28	-0.3	0.12	0.05	-0.065	-0.035	-0.215	-0.535	-0.595	-0.655	-0.495	-0.445	-0.685	-0.02	-0.57	-0.29	-0.54	-1.2	-0.91	-0.72	-0.67	-0.52	-0.36	-0.61	-0.15	0.13	0.06	-0.22	-0.52	-0.15	-0.39	-0.02	-0.28	0.1	-1.1	-1.07	-1	-0.79	-0.78	-0.26	0.402793
YMR059W	SEN15	tRNA processing*	tRNA-intron endonuclease activity	0	-0.46	-0.3	0	0.69	0.52	0.48	0.67	0.65	-0.29	-1.11	-0.7	-0.63	-0.62	-0.58	-0.36	-0.16	-0.01	0.095	-0.095	-0.105	0.025	0.465	0.515	0.315	0.235	0.135	-0.12	0.22	-0.24	-0.42	-0.13	-0.13	-0.96	-0.23	0.84	0.78	0.55	0.13	0.115	-0.025	0.065	0.035	-0.215	0.105	0.853787
YMR075W	RCO1	transcription*	metal ion binding*	0	-0.05	-0.14	-0.34	0.35	0.69	1.07	1.37	1.35	0.07	-0.15	-0.15	-0.11	0.31	0.4	0.39	0.32	0.35	0.235	0.105	-0.045	0.055	0.315	0.775	0.695	0.645	0.925	-0.11	-0.44	0.15	0.08	0.07	-0.02	-0.08	-0.17	0.13	0.35	0.3	0.03	-0.61	-0.93	-0.85	-0.84	-1.02	-1.34	0.83651
YMR080C	NAM7	telomere maintenance*	nucleotide binding*	0	-0.72	-0.64	-0.48	-0.31	-0.1	0.04	0.23	0.39	0	-0.74	-0.46	-0.23	-0.13	-0.2	-0.27	-0.29	-0.35	0.115	-0.105	-0.195	-0.465	-0.175	-0.215	-0.205	-0.175	-0.195	-0.25	-0.06	-0.16	-0.04	-0.08	-0.11	0.01	0.05	0.17	0	-0.06	0.08	-0.84	-0.58	-0.62	-0.51	-0.43	-0.4	0.4
YMR095C	SNO1	glutamine metabolic process*	molecular_function*	0	-1.32	-0.28	1.05	1.26	1.53	1.56	1.7	1.96	0.605	-0.465	-1.035	0.235	-0.945	-0.845	-0.405	-0.285	0.025	0.23	-0.13	-1.28	0.58	1.97	1.78	1.4	1.34	1.59	2.4	2.59	1.13	-0.16	0	0.84	-1.47	-1.44	-0.35	-0.39	-0.4	-0.03	-1.12	-1.59	-1.69	-1.98	-2.04	-1.6	0.218301
YMR108W	ILV2	amino acid biosynthetic process*	transferase activity*	0	-0.23	-0.03	0.24	-0.56	-0.34	-1.37	-1.44	-1.2	0.13	-1.25	-1.55	-0.06	0.59	0.56	0.37	0.44	0.76	0.015	0.105	0.195	-0.365	0.205	-0.255	-0.325	-0.285	-0.835	1.56	0.93	0.46	0.34	0.22	0.29	0.76	0.48	-0.57	-0.49	-0.39	0.06	0.685	0.635	0.265	-0.085	0.265	0.135	0.0232565
YMR121C	RPL15B	translation	RNA binding*	0	0.23	-0.23	-0.1	-0.46	-0.52	-0.49	-0.54	-0.46	0.065	0.675	0.355	0.295	0.255	0.405	0.405	0.425	0.325	0.285	0.485	0.615	0.535	1.095	1.225	1.335	1.465	1.105	0.69	0.7	0.41	0.33	0.02	0.12	0.69	0.56	0.25	-0.06	-0.01	-0.25	0.21	0.22	0.18	-0.14	0.06	-0.04	-0.172715
YMR127C	SAS2	transcription*	transferase activity*	0	-1.87	-0.85	-0.47	-0.26	0.04	0.13	0.18	0.48	-0.035	-0.925	-0.555	-0.335	-0.315	-0.195	-0.105	-0.115	-0.025	-0.19	-0.59	-0.69	-0.93	-0.92	-0.8	-0.68	-0.51	-0.48	-0.09	0.02	-0.67	-0.54	-0.24	-0.16	0.34	0.32	0.62	0.16	0.22	-0.03	-0.725	-0.555	-0.595	-0.705	-0.525	-0.605	-0.462428
YMR129W	POM152	transport*	structural molecule activity	0	-1.06	-0.93	-0.72	-0.72	-0.69	-0.85	-0.71	-0.78	-0.51	-1.15	-0.85	-0.83	-0.66	-0.77	-0.89	-0.9	-1.07	-0.305	-0.325	-0.385	-0.445	-0.395	-0.375	-0.345	-0.355	-0.275	-0.12	-0.18	-0.1	-0.2	-0.17	-0.24	0.02	-0.19	0.18	-0.17	0	-0.03	-0.035	-0.085	-0.225	-0.175	-0.465	-0.255	-0.21
YMR138W	CIN4	small GTPase mediated signal transduction*	nucleotide binding*	0	-1.39	-0.81	-0.6	-0.16	-0.15	0.25	0.17	0.35	-0.115	-0.505	-0.445	-0.325	-0.335	-0.165	-0.095	-0.065	-0.085	0.07	-0.15	-0.34	-0.34	-0.29	-0.21	-0.2	-0.1	-0.48	-0.05	0.42	0.2	-0.01	0.13	0.19	-1.02	-0.66	0.34	0.07	0.26	0.08	-0.33	-0.21	-0.21	0.09	-0.13	-0.29	0.49149
YMR153W	NUP53	transport*	structural molecule activity	0	-1	-0.6	-0.44	-0.15	0.12	0.2	0.34	0.43	0.075	-0.915	-0.545	-0.395	-0.155	-0.125	0.055	0.095	0.245	0.195	-0.015	0.135	0.405	0.485	0.535	0.585	0.755	0.645	0.38	0.13	0.12	-0.01	-0.11	-0.03	0.86	0.66	0.11	-0.06	0.01	0	0.59	0.67	0.51	0.39	0.43	0.12	-0.21
YMR187C	YMR187C	biological_process	molecular_function	0	-0.99	-0.31	-0.15	0	0.28	0.61	0.99	1.31	-0.02	-0.04	-0.16	0	-0.17	-0.04	0.05	0.15	0.32	0.055	-0.355	-0.275	-0.055	0.415	0.445	0.425	0.345	0.505	0.24	0.29	-0.07	-0.24	0	0.16	-0.34	-0.25	0.56	0.24	0.14	0.11	0.29	0.25	0.33	0.45	0.42	0.29	-0.05
YMR193C-A	YMR193C-A	biological_process	molecular_function	0	-0.21	-0.55	-0.18	1.07	1.18	1.28	-0.16	1.64	-0.42	-1.2	0.12	-0.09	0.93	0.46	0.7	0.26	-0.16	0.06	-0.01	0.01	-0.12	-0.4	-0.51	-0.52	-1.49	-0.72	-0.71	0.04	-0.23	-0.14	0.37	0.38	-1.89	-1.93	-1.49	-0.9	-0.22	0.2	-0.155	-0.405	0.275	0.945	0.645	0.945	0.04
YMR200W	ROT1	protein folding*	molecular_function	0	0.06	0.18	0.12	0.28	0.48	0.46	0.4	0.38	-0.305	-0.265	-0.095	-0.645	-0.775	-0.575	-0.335	-0.495	-0.525	-0.56	-0.71	-0.59	-0.52	-0.69	-0.61	-0.56	-1.02	-0.69	0.27	0.06	0.11	-0.06	0	0	-0.54	-0.82	-0.63	-0.51	-0.14	0.24	-1.525	-1.355	-1.315	-0.945	-0.945	-1.295	0.267064
YMR216C	SKY1	protein amino acid phosphorylation*	nucleotide binding*	0	-0.15	-0.04	-0.04	-0.01	0.03	0.05	0.12	-0.07	0.095	0.435	0.555	0.465	0.125	-0.085	-0.055	-0.085	0.145	0.175	0.095	0.115	0.275	0.255	0.275	0.265	0.305	0.195	-0.22	-0.31	-0.19	-0.06	-0.21	-0.49	0.97	0.73	0.46	0.06	-0.15	-0.11	0.55	0.76	0.75	0.9	0.68	0.49	-0.452551
YMR223W	UBP8	transcription*	hydrolase activity*	0	-0.28	-0.51	-0.67	0.18	0.28	0.42	0.38	0.51	-0.155	-1.385	-1.135	-0.935	-0.485	-0.525	-0.525	-0.585	-0.525	0.185	-0.005	-0.165	-0.885	-0.205	0.025	0.045	-0.085	-0.105	-0.47	-0.62	-0.6	-0.52	-0.19	-0.16	-0.86	-0.84	-0.06	-0.29	-0.08	0.04	-0.325	-0.345	-0.225	0.015	-0.085	0.385	-0.03
YMR234W	RNH1	cell wall organization and biogenesis*	hydrolase activity*	0	-0.24	-0.27	-0.39	0.17	0.36	0.5	0.46	0.47	0.14	0.44	-0.12	-0.08	0.21	0.37	0.48	0.42	0.32	0.045	-0.025	-0.045	-0.515	-0.115	-0.075	-0.015	-0.075	0.045	-0.26	-0.07	-0.15	-0.04	0.05	0.18	-0.59	-0.41	0.41	0.2	0.37	0.29	-0.27	-0.44	-0.3	0.03	-0.12	-0.02	0.29
YMR240C	CUS1	mRNA processing*	RNA binding*	0	-0.47	-0.25	-0.34	-0.14	0.2	0.28	0.46	1.13	-0.03	-0.32	-0.48	-0.44	0.09	0.27	0.33	0.21	0.43	-0.04	-0.18	-0.17	-0.33	0.02	-0.04	-0.03	0.14	-0.14	-0.4	-0.27	-0.38	-0.42	-0.43	-0.17	0.42	0.11	-0.26	-0.18	-0.16	-0.42	-0.165	0.065	-0.235	-0.545	-0.345	-0.865	-0.574622
YMR247C	RKR1	chromatin modification*	metal ion binding*	0	-0.62	-0.68	-0.17	-0.33	-0.22	-0.24	0.16	0.04	-0.03	-1.13	-0.55	-0.42	-0.11	0	-0.08	-0.04	0.15	0.355	0.115	0.025	-0.415	-0.215	-0.185	-0.165	0.115	0.155	-0.2	-0.07	-0.21	-0.16	-0.22	-0.14	-0.3	-0.4	0.1	0.01	-0.14	-0.18	0.275	0.325	0.225	0.455	0.335	0.365	0.204805
YMR259C	YMR259C	biological_process	molecular_function	0	-1.75	-1.18	-0.79	-0.31	-0.49	-0.7	-0.44	-0.68	0.1	-2.72	-0.95	-0.4	-0.25	-0.31	-0.28	-0.22	-0.31	0.435	-0.045	-0.185	-0.105	0.465	0.575	0.605	0.695	0.315	-0.48	-0.52	-0.3	-0.3	-0.05	0.19	-0.49	-0.19	0.09	-0.06	-0.05	0.15	0.435	0.465	0.355	0.605	0.475	0.905	0.26
YMR263W	SAP30	transcription*	histone deacetylase activity	0	-0.05	-0.08	0.01	-0.19	-0.48	-0.81	-1.28	-1.34	-0.015	0.045	0.055	-0.415	-0.425	-0.635	-0.705	-0.745	-0.845	0.29	0.31	0.31	0.09	-0.09	-0.02	-0.11	-0.12	-0.33	0.2	0.04	0.13	0.14	0.07	0.17	0.26	0.42	0.03	0.02	0.22	0.26	-0.2	-0.05	0.19	0.09	0.19	0.26	-0.164697
YMR268C	PRP24	mRNA processing*	nucleotide binding*	0	-0.76	-0.48	-0.37	0.4	0.5	0.42	0.46	-0.04	0.175	-0.675	-0.355	0.345	0.205	0.285	0.195	0.265	0.285	0.19	-0.21	-0.26	-0.17	0.47	0.29	0.58	0.59	0.68	-0.03	-0.17	-0.11	0.03	-0.22	-0.08	0.34	0.33	0.49	0.33	0.33	-0.07	0.23	0.3	0.07	-0.03	0.12	-0.6	0.510501
YMR269W	TMA23	ribosomal small subunit biogenesis and assembly	molecular_function	0	-2.13	-1.88	-1.15	-0.34	0.07	0.55	0.43	1.71	-0.245	-3.205	-2.125	-1.495	-1.135	-1.145	-1.095	-0.945	-0.635	0.185	-0.315	-0.495	-0.445	-0.325	-0.445	-0.515	-0.685	-0.385	-0.29	-0.17	-0.14	-0.34	-0.2	0.28	-0.87	-0.68	-0.14	0.2	0.35	0.14	0.765	0.695	0.885	0.595	0.815	0.645	-0.290527
YMR277W	FCP1	transcription*	hydrolase activity*	0	-0.8	-0.65	-0.46	-0.53	-0.45	-0.68	-0.96	-0.67	0.075	-0.685	-0.365	-0.485	0.215	0.235	0.205	0.165	-0.025	0.24	0.13	0.2	-0.48	-0.53	-0.35	-0.28	-0.42	-0.27	-0.24	-0.49	-0.09	0.07	0.13	0.13	0.68	0.45	-0.45	-0.58	-0.21	0.06	-0.64	-0.52	-0.48	-0.38	-0.24	-0.24	-0.508172
YMR283C	RIT1	tRNA processing*	transferase activity*	0	-0.13	-0.49	-0.69	-0.16	0.15	0.31	0.47	0.56	0.085	0.285	-0.565	-0.485	-0.215	0.015	-0.135	-0.125	-0.065	0.325	0.275	-0.035	-0.255	0.135	0.255	0.455	0.415	0.525	-0.34	-0.46	-0.38	-0.32	-0.1	-0.17	-0.51	-0.51	0.1	0.21	0.24	0.09	0.28	0.09	0.17	0.3	0.31	0.37	-0.532378
YNL004W	HRB1	poly(A)+ mRNA export from nucleus	nucleotide binding*	0	-0.24	-0.23	-0.11	-0.37	-0.37	-0.45	-0.65	-0.89	0.015	-0.685	-0.725	-0.575	-0.495	-0.305	-0.275	-0.235	0.385	-0.02	-0.17	-0.27	-0.32	-0.21	-0.28	-0.31	-0.13	-0.36	0.2	0.16	0.09	0.1	-0.03	0	0.34	0.24	-0.33	-0.41	-0.31	-0.1	0.025	0.205	0.105	0.115	0.285	0.265	-0.72
YNL039W	BDP1	transcription*	DNA binding*	0	-0.3	-0.26	-0.21	-0.28	-0.29	-0.31	-0.57	-0.28	0.325	0.355	0.295	0.395	0.275	0.365	0.325	0.285	0.265	0.27	0.32	0.22	0.12	0.41	0.36	0.67	0.89	0.93	-0.03	-0.33	0.01	0	-0.27	-0.35	0.98	0.76	0.16	0.12	0.16	-0.15	0.36	0.32	0.32	0.08	0.12	-0.07	-0.37
YNL042W	BOP3	response to mercury ion	molecular_function	0	0.02	-0.2	-0.52	0.22	0.45	0.44	0.75	0.39	0.105	0.605	0.565	0.995	0.675	0.695	0.625	0.675	0.625	0.195	0.195	-0.025	0.725	1.015	0.975	0.735	0.795	0.915	0.05	-0.07	0.35	0.45	0.03	-0.03	0.79	0.8	0.74	0.49	0.68	0.66	-1.26	-1.11	-1.2	-1.33	-1.56	-1.73	0.0013726
YNL050C	YNL050C	biological_process	molecular_function	0	-0.8	-0.64	-0.4	0.1	0.43	0.95	0.96	0.63	-0.175	-1.285	-0.605	-0.255	0.005	0.305	0.465	0.465	0.435	0.135	-0.135	-0.135	-0.145	0.125	0.255	0.265	0.395	0.345	0.07	0.03	-0.26	-0.43	-0.12	-0.01	-0.13	0.11	0.54	0.55	0.51	-0.05	0.235	0.275	0.165	0.015	0.095	-0.385	-0.54
YNL064C	YDJ1	transport*	metal ion binding*	0	-0.56	-0.91	-0.88	-0.04	-0.13	-0.03	-0.22	-0.26	0.235	-1.935	-0.915	0.725	1.285	1.275	1.125	1.075	0.635	0.195	0.335	0.305	0.085	1.145	0.755	1.085	0.775	0.425	0.53	-0.15	-0.12	-0.16	0.07	0.23	0.11	-0.7	-0.65	-0.37	-0.03	0.17	0.405	-0.185	-0.335	-0.575	-0.055	-0.135	0.824319
YNL068C	FKH2	regulation of transcription, DNA-dependent*	DNA binding*	0	-1.38	-0.59	-0.3	-0.14	0.06	-0.14	0.03	-0.06	-0.095	-1.075	-0.085	0.425	1.165	0.845	0.735	0.455	0.655	0.2	-0.12	-0.24	-0.39	0.75	1.09	1.16	1.21	1.18	-0.1	-0.27	0	-0.11	0	-0.02	0.97	0.66	-0.03	-0.42	-0.14	-0.01	0.285	0.255	-0.165	-0.035	-0.285	-0.365	0.511928
YNL074C	MLF3	response to drug	molecular_function	0	0.23	-0.58	-0.25	-0.36	-0.02	-0.11	0.53	0.71	0.055	0.715	0.105	-0.045	-0.075	0.005	0.155	0.205	0.465	-0.145	-0.135	-0.105	0.045	0.205	0.255	0.255	0.215	0.605	-0.03	-0.43	0.07	0.33	0.23	0.27	-0.01	0.06	-0.52	-0.2	-0.14	0.36	-0.33	-0.49	-0.57	-0.36	-0.1	0.14	-0.79
YNL076W	MKS1	transcription*	transcription repressor activity	0	-0.06	-0.08	-0.1	0.17	0.28	0.14	0.27	0.41	0.12	0.18	0.2	0.42	0.68	0.75	0.69	0.64	0.81	0.15	0.09	0.06	0.21	0.61	0.79	0.77	0.67	0.93	0.22	0.01	0.51	0.48	0.27	0.21	0.92	0.7	0.07	0.04	-0.04	0.07	-0.445	-0.515	-0.735	-0.725	-0.725	-0.945	-0.25
YNL101W	AVT4	transport*	transporter activity*	0	-0.79	-0.87	-0.66	-0.42	-0.09	0.1	0.66	1.16	0.055	0.815	0.555	0.505	0.455	0.375	0.325	0.235	0.285	-0.145	-0.265	-0.555	-0.475	-0.395	-0.515	-0.705	-0.845	-0.655	-0.45	-0.48	-0.24	-0.2	-0.13	-0.27	1.08	1.1	1.19	0.96	0.88	0.82	-0.77	-0.86	-0.85	-0.49	-0.75	-0.69	-0.337691
YNL128W	TEP1	spore wall assembly (sensu Fungi)*	hydrolase activity*	0	-0.33	-0.11	0.01	0.46	0.45	0.6	0.72	0.38	0.31	1.22	0.26	0.07	0.34	0.77	0.79	0.78	0.53	0.16	0.03	-0.26	0.07	0.49	0.47	0.5	0.7	0.4	0.7	0.58	0.1	0.07	-0.15	0.09	0.83	0.76	0.77	0.87	0.46	0.23	0.39	0.18	-0.08	-0.02	-0.28	-0.49	0.221229
YNL158W	PGA1	GPI anchor biosynthetic process*	mannosyltransferase activity	0	-0.42	-0.41	-0.52	-0.5	-0.72	-0.6	-0.6	-1.36	-0.1	0.4	-0.54	-0.28	-0.58	-0.62	-0.61	-0.47	-0.4	-0.155	-0.285	-0.625	-0.625	-0.485	-0.725	-0.355	-0.185	-0.515	-0.47	-0.43	-0.15	0.08	-0.26	-0.25	-0.05	0.19	-0.14	-0.37	-0.15	-0.02	-0.705	-0.455	-0.235	-0.245	-0.075	-0.225	-0.220543
YNL163C	RIA1	translation*	nucleotide binding*	0	-0.91	-0.68	-0.38	-0.26	-0.34	-0.98	-1.46	-1.47	0.14	-1.21	-0.32	0.54	0.57	0.27	0.07	0.05	-0.25	0.31	2.78e-17	-0.12	-0.11	0.45	0.23	0.3	0.57	0.37	-0.01	-0.08	0.17	0.14	-0.03	-0.05	0.7	0.55	0.39	0.17	0.09	0.14	0.45	0.5	0.39	0.17	0.33	0.38	0.374801
YNL186W	UBP10	ubiquitin cycle*	hydrolase activity*	0	-1.45	-0.92	-0.38	-0.23	-0.02	-0.12	0.38	0.18	-0.205	-2.235	-0.705	-0.045	-0.135	-0.205	-0.285	-0.295	-0.475	-0.095	-0.455	-0.705	-0.705	-0.305	-0.385	-0.225	-0.365	-0.185	0.07	-0.35	0.06	0.01	-0.01	0.09	0.73	0.21	-1	-0.54	-0.29	-0.04	-0.57	-0.75	-0.86	-0.95	-0.83	-0.82	0.24
YNL187W	YNL187W	transport	molecular_function	0	-0.08	-0.29	-0.68	0.16	0.33	0.61	1.08	0.88	-0.385	0.005	-0.595	-0.545	-0.415	-0.475	-0.355	-0.205	-0.175	-0.22	-0.43	-0.58	-0.52	-0.25	-0.54	-0.71	-0.66	-0.83	-0.71	-0.32	-0.08	-0.18	-0.64	-0.34	0.09	-0.3	-0.62	-1.2	-0.66	-0.4	-0.815	-0.595	-0.515	-0.765	-0.435	-0.985	-0.0088687
YNL190W	YNL190W	response to osmotic stress	molecular_function	0	-0.65	-0.18	-0.61	-0.35	-0.1	-0.55	-0.1	0.01	-0.38	-0.56	-0.26	0.29	-0.01	-0.1	-0.05	-0.27	0.6	-0.42	-0.44	-0.52	0.01	0.64	0.03	-0.1	0.08	0.74	-0.16	-0.51	0.21	0.46	-0.04	-0.33	0.77	0.24	0.01	0.07	-0.02	0.23	-1.495	-1.215	-1.075	-0.975	-0.985	-1.615	0.706214
YNL199C	GCR2	transcription*	transcription activator activity	0	-0.22	-0.1	-0.2	0.7	0.88	1.05	0.81	0.79	0.115	-0.705	-0.405	-0.105	0.045	-0.125	-0.315	-0.285	-0.315	0.23	0.19	-0.04	0.11	0.68	0.65	0.88	0.73	0.61	-0.29	-0.15	-0.11	0.04	-0.01	-0.01	0.08	-0.09	0.04	-0.14	-0.02	-0.14	0.235	0.035	-0.095	-0.085	-0.245	-0.225	-0.9
YNL201C	PSY2	response to DNA damage stimulus*	molecular_function	0	-0.66	-0.5	-0.56	-0.16	0.08	0.19	0.33	0.45	0.115	-0.435	-0.025	0.095	0.085	-0.045	-0.165	-0.235	-0.385	0.3	0.19	0.16	0.02	-0.02	-0.04	0.03	0.28	0.32	-0.06	0.03	0.19	0.09	-0.13	-0.13	-0.03	0.18	0.27	0.37	0.27	-0.1	0.815	0.755	0.755	0.645	0.625	0.745	-0.0865263
YNL221C	POP1	rRNA processing*	hydrolase activity*	0	-1.15	-1.04	-0.78	-0.68	-0.7	-1.34	-1.7	-1.72	-0.135	-2.165	-1.565	-0.865	-0.465	-0.375	-0.335	-0.255	0.185	0.24	-0.03	-0.4	-0.77	-0.04	-0.02	-1.39e-17	-0.15	-0.29	0.17	0.21	-0.05	-0.12	-0.2	-0.11	0.15	-0.24	-0.53	-0.75	-0.47	-0.34	-0.095	-0.015	-0.115	-0.155	-0.045	-0.225	-0.00193607
YNL227C	JJJ1	protein folding*	metal ion binding*	0	-1.41	-0.7	-0.21	0.11	0.39	0.29	0.43	0.94	-0.06	-1.58	-0.82	-0.33	0.48	0.85	1.28	1.74	2.88	0.385	-0.075	-0.045	-0.235	-0.015	0.415	0.445	0.295	0.175	0.09	0.17	-0.02	-0.05	0.11	0.24	-0.4	-0.57	-0.18	0.01	0.36	0.05	-0.59	-0.92	-0.84	-1.11	-0.95	-0.67	-0.24
YNL232W	CSL4	rRNA processing*	hydrolase activity*	0	-1.26	-0.84	-0.59	-0.59	-0.46	-0.45	-0.69	-0.01	-0.06	-1.55	-0.95	-0.6	-0.22	-0.13	-0.11	-0.14	-0.12	0.135	-0.085	-0.265	-0.635	-0.245	-0.095	-0.245	-0.485	-0.385	-0.18	-0.08	-0.22	-0.13	-0.1	0.06	-0.84	-0.81	-0.4	-0.16	0.08	0.01	-0.345	-0.185	-0.185	-0.105	-0.065	-0.125	-0.624243
YNL233W	BNI4	barrier septum formation*	protein binding	0	-0.41	-0.16	-0.2	-0.41	-0.44	-0.93	-1.05	-1.12	-0.065	0.495	0.175	-0.255	-0.165	-0.005	0.025	0.065	0.095	-0.145	-0.015	0.015	-0.405	-0.975	-0.655	-0.645	-0.615	-0.455	-0.79	-0.49	-0.61	-0.37	-0.29	-0.4	0.2	-0.04	0.1	-0.4	0.07	-0.08	-0.19	0.1	-0.1	0.07	0.09	0.01	-0.722183
YNL238W	KEX2	proteolysis*	hydrolase activity*	0	-0.76	-0.92	-0.89	-0.64	-0.63	-0.5	-0.34	-0.74	-0.41	-0.39	-0.44	-0.54	-0.44	-0.47	-0.52	-0.53	-0.63	-0.275	-0.245	-0.105	-0.515	-0.715	-0.605	-0.625	-0.415	-0.445	-0.44	-0.38	-0.1	0.06	0.04	0.12	0.46	0.5	0.16	0.17	0.04	0.41	-0.31	-0.19	-0.25	0.01	-0.02	-0.09	-0.59
YNL244C	SUI1	translation*	translation initiation factor activity	0	-1.06	-1.05	-1.12	-0.41	-0.13	0.24	0.22	0.47	0.035	-1.665	-1.065	-0.875	-0.745	-0.805	-0.965	-1.015	-1.005	0.295	0.305	0.165	-0.435	-0.445	-0.395	-0.375	-0.235	-0.345	-0.68	-0.4	-0.54	-0.41	-0.11	0.16	-0.65	-0.27	0.61	0.17	0.27	0.15	-0.765	-0.715	-0.585	-0.305	-0.425	-0.065	-0.213002
YNL245C	CWC25	mRNA processing*	molecular_function	0	-0.76	-0.44	-0.26	0.86	0.9	1.1	1.33	1.16	0.02	0.11	0.23	0.77	0.51	0.52	0.48	0.42	0.26	0.16	-0.15	0.04	0.17	0.25	-0.25	-0.18	0.05	-0.17	0.43	0.45	0.34	0.34	0.09	0.22	0.83	0.74	-0.02	-0.31	-0.24	0.26	-1.355	-1.085	-1.165	-0.895	-0.515	-0.675	0.493437
YNL254C	YNL254C	biological_process	molecular_function	0	-0.98	-0.89	-0.69	-0.17	-0.19	-0.59	-0.79	-1.58	-0.39	-0.98	-0.68	-0.3	-0.11	0.07	0.02	-0.09	-0.22	-0.155	-0.625	-0.725	-0.585	0.465	0.345	0.405	0.345	0.205	0.28	0.22	-0.08	-0.18	-0.39	-0.07	1.05	0.6	0.38	-0.08	0.03	0	-0.71	-0.44	-0.58	-0.58	-0.39	-0.9	0.505237
YNL261W	ORC5	DNA replication*	nucleotide binding*	0	-0.01	0.06	-0.48	-0.14	-0.81	-1.24	-1.64	-1.96	0.05	-0.22	-0.17	0.16	-0.15	-0.55	-0.76	-0.78	-1.08	0.195	0.135	0.005	0.065	0.605	0.355	0.355	0.305	0.265	-0.16	-0.26	-0.13	-0.12	0.14	0.42	-0.53	-0.59	0.03	0.1	0.18	0.43	0.2	0.12	0.18	0.28	0.49	0.64	0.11
YNL276C	YNL276C	biological_process	molecular_function	0	0.48	0.12	-0.98	0.08	-0.11	-0.73	-0.53	0.16	-0.445	-0.985	-0.845	-1.035	-0.565	-0.335	-0.325	-0.125	1.155	0.15	0.05	-0.33	-0.79	-1.58	-1.7	-1.93	-1.5	-1.15	-0.06	0.11	-0.19	0.14	0.33	0.49	1.13	1.08	0.42	0.38	0.35	0.19	0.145	0.215	0.015	-0.155	0.255	0.665	-0.37
YNL277W	MET2	amino acid biosynthetic process*	transferase activity*	0	0.35	0.38	-0.86	0.66	0.41	-0.34	-0.94	-1.51	-0.045	-0.415	-0.475	-0.475	-0.085	0.125	0.375	0.735	2.115	0.045	-0.005	-0.455	-0.865	-2.235	-1.985	-1.865	-1.675	-1.305	-0.54	-0.53	-0.49	-0.29	-0.09	-0.16	0.71	0.34	-0.43	-0.65	-0.39	-0.18	-1.595	-1.345	-1.125	-1.145	-0.725	-0.745	-0.409877
YNL281W	HCH1	telomere maintenance*	chaperone binding*	0	-0.54	-0.93	-1.08	-0.21	-0.77	-0.76	-0.88	-1.16	0.05	-0.85	-0.5	0.18	0.29	0.33	0.29	0.25	0.03	0.225	0.365	0.365	-0.395	0.125	0.375	0.205	0.145	-0.345	0.25	0.18	-0.22	-0.16	-0.03	0.1	-0.88	-1.08	-0.16	-0.34	0.11	0.07	0.05	-0.4	-0.33	-0.23	0.03	0.4	0.727292
YNL282W	POP3	rRNA processing*	ribonuclease P activity*	0	-1.27	-1.22	-0.88	0.11	0	0.1	0.13	0.62	-0.375	-1.635	-1.355	-0.765	-0.005	0.025	0.105	0.265	0.295	-0.04	-0.53	-0.61	-1.17	0.43	0.46	0.47	0.28	0.46	-0.99	-0.69	-0.62	-0.69	-0.12	0.05	-0.64	-1.05	-0.95	-0.73	-0.02	-0.02	0.6	0.45	0.93	0.81	0.94	0.99	-0.0742052
YNL299W	TRF5	cell cycle*	transferase activity*	0	-2.32	-1.15	-0.62	-0.49	-0.19	-0.31	-0.35	0.01	0.065	-0.955	-0.095	0.225	0.245	0.265	0.185	0.305	0.305	0.22	-0.48	-0.33	-0.13	0.07	0.21	0.48	0.58	0.63	-0.51	-0.6	-0.47	-0.52	-0.41	-0.26	0.39	0.11	0.01	-0.15	0.03	-0.28	0.34	0.44	0.29	0.17	0.22	0.06	0.02
YNL308C	KRI1	ribosome biogenesis and assembly*	molecular_function	0	-2.59	-1.5	-1.01	-0.69	-0.07	0.07	0.12	0.95	0.05	-3.93	-1.92	-1.34	-0.65	-0.14	0.03	0.16	0.3	0.41	-0.18	-0.23	-0.66	-0.43	-0.07	0.14	0.08	0.21	-0.39	-0.47	-0.08	-0.19	-0.11	0.17	-0.44	-0.2	-0.35	0.1	0.23	0.1	-0.45	-0.35	-0.35	-0.64	-0.47	-0.84	-0.07
YNL311C	YNL311C	ubiquitin-dependent protein catabolic process	protein binding	0	-1	-1.03	-0.6	-0.86	-0.7	-0.67	-0.35	-0.07	0.135	0.335	-0.485	-0.125	-0.075	-0.125	-0.175	-0.245	0.135	0.075	0.215	0.145	0.125	0.425	0.545	0.395	0.345	0.235	0.39	0.35	0.28	0.07	-0.2	-0.13	0.5	0.4	0.6	0.39	0.41	0.51	0.115	0.055	0.135	0.125	0.095	0.035	0.31
YNR018W	YNR018W	biological_process	molecular_function	0	0.17	0.78	0.51	-0.09	-0.23	-0.52	-0.71	-0.2	0.045	0.405	0.785	0.485	-0.365	-0.335	-0.285	-0.285	-0.595	0.085	0.015	0.025	0.635	-0.305	-0.785	-0.905	-0.685	-0.765	0.23	0.35	0.47	0.4	0.12	-0.08	0.33	0.22	-0.7	-0.93	-0.58	-0.59	0.795	0.815	0.455	0.205	0.215	-0.095	-0.639187
YNR024W	YNR024W	biological_process	molecular_function	0	-1.14	-1.14	-0.38	-0.26	-0.16	-0.03	-0.35	0.44	-0.185	-2.975	-1.885	-1.275	-1.005	-0.905	-0.745	-0.495	-0.455	0.195	-0.255	-0.515	-0.545	-0.385	-0.495	-0.595	-0.675	-0.695	-0.25	-0.06	-0.26	-0.12	-0.29	-0.11	-1.23	-1	-0.04	0.25	0.32	-0.21	0.31	0.21	0.24	0.22	0.18	-0.24	0.18
YNR029C	YNR029C	biological_process	molecular_function*	0	-0.26	-0.04	-0.07	0.21	0.43	0.52	0.36	0.29	-0.015	-0.805	-0.475	-0.225	-0.155	0.125	0.155	0.115	0.085	0.08	0.07	0.14	0.02	0.04	-0.25	-0.27	-0.12	-0.25	-0.08	0	0.04	0.07	-0.07	-0.01	-0.17	-0.24	-0.04	-0.04	0.04	-0.16	0.355	0.665	0.675	0.495	0.665	0.405	0.04
YNR055C	HOL1	transport	transporter activity	0	-0.07	-0.21	-0.43	0.06	0.15	0.12	0.02	-0.36	-0.24	-0.5	-0.49	-0.3	-0.51	-0.6	-0.55	-0.4	-0.68	-0.365	-0.625	-0.895	-1.145	-0.565	-0.715	-0.755	-0.735	-0.775	-0.66	-0.74	-0.51	-0.29	-0.38	-0.41	-0.02	-0.01	-0.27	-0.4	-0.39	-0.3	-1.125	-0.845	-0.795	-0.455	-0.395	-0.115	-0.09
YNR058W	BIO3	biotin biosynthetic process	transferase activity*	0	-0.28	-0.2	0.86	0.24	0	-0.14	-0.05	-0.26	-0.23	-0.02	-0.59	-0.37	-0.05	0.3	0.49	0.53	0.71	-0.16	-0.29	-0.37	-0.1	0.63	0.63	0.61	0.57	0.32	2.47	1.51	2.14	1.06	0.53	0.54	-0.11	0.18	-0.09	-0.02	0.13	0.27	-1.06	-1.43	-1.9	-1.81	-1.82	-1.54	-0.323156
YOL002C	IZH2	lipid metabolic process*	metal ion binding*	0	-0.05	0.01	-0.33	0	-0.24	-0.43	-0.67	-0.37	-0.31	-0.3	-0.26	-0.11	0.02	-0.03	0.16	0.05	0.09	-0.39	-0.44	-0.19	0.02	0.35	0.6	0.53	0.7	0.61	-0.14	-0.07	-0.01	0.26	-0.06	-0.17	0.34	0.42	0.82	0.42	0.12	-0.11	0.7	0.16	0.09	0.09	-0.33	-0.12	-0.982698
YOL022C	YOL022C	biological_process*	molecular_function	0	-2.3	-1.34	-0.88	-0.8	-0.19	-0.05	0.1	0.79	0.055	-2.615	-1.105	-0.525	-0.805	-0.815	-0.865	-1.015	-1.065	0.275	-0.415	-0.605	-0.635	-0.335	-0.065	-0.075	0.135	-0.135	0.06	0.03	-0.22	-0.23	-0.05	0.1	-0.25	-0.1	0.54	0.08	0.01	-0.06	0.01	0.02	0.04	0.01	0.11	0.19	0.14
YOL066C	RIB2	RNA processing*	hydrolase activity*	0	-0.16	-0.26	-0.24	0.11	0.26	0.15	0.33	0.07	0.005	-0.515	-0.155	-0.035	0.405	0.435	0.365	0.465	0.865	0.13	-0.05	-0.13	-0.07	0.12	0.03	-0.02	0.02	0.01	-0.55	-0.3	-0.12	-0.03	-0.16	-0.11	0.04	0	-0.63	-0.51	-0.37	-0.24	-0.375	-0.415	-0.455	-0.605	-0.425	-0.255	-0.194294
YOL103W	ITR2	transport*	transporter activity*	0	-0.63	-0.71	-0.62	-0.43	-0.24	-0.32	-1.08	0.07	-0.365	-0.855	-0.385	-0.685	0.015	-0.425	-0.265	-0.535	-0.745	-0.37	-0.44	-0.38	-0.6	-0.89	-0.93	-1.05	-1.33	-1.07	-0.8	-0.54	-0.46	-0.51	-0.36	-0.35	0.12	-0.11	-0.52	-0.7	-0.28	-0.25	-0.97	-0.6	-0.45	-0.25	-0.16	-0.42	-0.39
YOL115W	PAP2	cell cycle*	transferase activity*	0	-0.92	-0.89	-1	-0.53	-0.38	-0.06	-0.22	-0.13	0.055	-0.915	-0.755	-0.405	-0.185	0.125	0.045	-0.005	-0.075	0.155	-0.095	-0.245	-0.935	-0.985	-0.965	-0.725	-0.635	-0.675	-0.61	-0.68	-0.23	-0.09	0.03	0.11	0.12	0.05	-0.33	0.05	0.15	0.14	-0.4	-0.31	-0.33	-0.2	-0.06	0.03	-0.36
YOL119C	MCH4	transport	transporter activity*	0	-0.13	-0.17	-0.74	-0.94	-0.85	-0.93	-0.87	-0.96	-0.425	-0.215	-0.235	0.205	0.255	-0.265	-0.265	0.075	0.105	-0.9	-0.77	-0.51	-0.37	0.55	0.29	0.07	-0.15	-0.34	0.53	0.54	-0.16	-0.46	-0.47	-0.07	1.11	0.76	0.73	0.07	0.56	0.57	-0.2	0.06	-0.07	-0.01	-0.12	-0.1	0.960668
YOL128C	YGK3	protein amino acid phosphorylation*	nucleotide binding*	0	-1.98	-1.73	-1.18	-1.91	-1.93	-2.3	-2.11	-1.61	0.685	3.225	2.815	2.725	1.935	1.825	1.795	1.845	2.225	0.11	-0.54	-0.85	-0.68	-0.98	-1.04	-0.77	-0.69	-0.6	0.15	-0.07	-0.12	-0.22	-0.27	-0.03	2.97	2.9	2.59	1.96	1.36	0.98	-0.73	-0.73	-0.79	-0.84	-0.73	-0.58	-0.150656
YOL130W	ALR1	transport*	magnesium ion binding*	0	-0.95	-1.34	-0.85	-0.19	0.26	0.27	0.46	0.3	-0.085	-0.495	-0.545	-0.425	-0.675	-0.605	-0.675	-0.575	-0.215	0.31	0.23	0.33	1	1.05	0.83	1.09	1.17	1.36	0.2	-0.01	0.17	0.03	-0.15	0.08	1.02	0.98	0.37	-0.05	-0.01	0.2	0.41	0.6	0.5	0.38	0.32	-0.02	0.185831
YOL135C	MED7	transcription*	transcription coactivator activity*	0	-0.1	-0.03	0	0.67	0.81	1.02	1.23	1.5	-0.005	-0.035	0.095	0.095	0.385	0.465	0.615	0.735	0.755	0.23	0.19	0.19	0.42	0.7	0.93	0.87	0.96	1.03	-0.35	-0.68	-0.36	-0.31	-0.27	-0.27	0.42	0.25	-0.63	-0.94	-0.55	-0.53	-0.25	-0.15	-0.34	-0.32	-0.24	-0.02	0.0191513
YOL142W	RRP40	rRNA processing*	hydrolase activity*	0	-1.58	-1.15	-0.52	-0.21	-0.15	-0.19	-0.3	0.18	0.015	-1.055	-0.475	-0.335	-0.215	0.065	0.095	0.005	0.115	0.175	-0.235	-0.215	-0.435	-0.415	-0.215	-0.225	-0.175	-0.075	-0.07	-0.04	-0.19	-0.1	-0.01	0.14	-0.73	-0.38	0.01	-0.21	-0.15	0.13	-0.245	-0.255	-0.345	-0.165	-0.095	0.275	-0.27
YOL145C	CTR9	transcription*	DNA binding*	0	-0.19	-0.18	-0.09	-0.15	-0.16	-0.32	-0.46	-0.77	0.23	-0.21	-0.3	-0.32	-0.53	-0.6	-0.65	-0.57	-0.43	0.36	0.3	0.34	0.09	4.16e-17	0.02	0.12	0.32	-0.12	0.14	-0.04	0.25	0.07	0.04	-0.1	0.71	0.92	0.38	0.45	0.2	-0.06	0.39	0.57	0.44	0.23	0.3	-0.04	-0.23
YOR001W	RRP6	ribosome biogenesis and assembly*	hydrolase activity*	0	-1.63	-1.14	-0.68	-0.23	-0.03	-0.07	-0.08	-0.01	-0.015	-2.645	-1.285	-0.715	-0.895	-0.815	-0.825	-0.785	-0.885	0.26	-0.13	-0.33	-0.3	0.02	-0.18	0.13	-0.04	0.13	-0.2	-0.32	-0.03	-0.12	-0.12	-0.16	0.24	-0.13	-0.21	-0.42	-0.2	-0.1	0.525	0.645	0.365	0.325	0.335	0.255	0.3
YOR047C	STD1	transcription*	protein kinase activator activity	0	-1.12	-1.5	-1.8	-1.01	-1.07	-0.54	-0.54	-0.39	-0.07	-0.33	0.29	0.65	0.52	0.49	0.37	0.32	0.54	0.11	0.04	-0.1	0.32	0.19	0.18	0.18	-0.04	0.33	-0.88	-0.51	-0.54	-0.41	-0.75	-0.11	1.11	0.89	1.18	1.04	0.8	0.76	-0.585	-0.635	-0.635	-0.635	-0.775	-1.105	-0.14
YOR048C	RAT1	transcription*	hydrolase activity*	0	-1.14	-1.03	-0.9	-0.96	-0.66	-0.71	-0.47	-0.42	-0.215	-0.505	-0.495	-0.345	-0.395	-0.425	-0.395	-0.425	-0.455	-0.11	-0.38	-0.49	-0.58	-0.67	-0.73	-0.64	-0.73	-0.72	-0.15	-0.23	0.14	0.17	0.1	0.1	0.48	0.34	-0.01	0.16	0.18	0.26	-0.295	-0.325	-0.165	-0.165	0.065	-0.085	0.100975
YOR056C	NOB1	ribosome biogenesis and assembly*	hydrolase activity*	0	-2.55	-1.38	-0.37	0.01	0.15	-0.28	-0.51	-0.24	0.045	-2.815	-1.185	-0.255	0.445	0.445	0.455	0.655	0.675	0.33	-0.19	-0.17	-0.27	0.16	0.13	0.14	0.19	-0.11	0.23	-0.14	-0.19	-0.35	-0.04	0.13	0.37	0.14	-0.38	-0.22	0.05	0.11	0.41	0.34	0.31	0.17	0.41	0.31	-0.19
YOR066W	YOR066W	biological_process*	molecular_function	0	0.03	-0.06	-0.2	0.41	0.42	0.3	0.13	-0.45	0.1	0.66	0.64	0.46	0.56	0.34	0.33	0.19	0.07	0.005	0.095	-0.015	0.565	0.625	0.475	0.505	0.435	0.535	-0.12	-0.74	-0.16	-0.11	0.02	-0.27	0.97	0.84	0.49	0.43	0.45	0.58	-0.295	-0.405	-0.465	-0.425	-0.575	-0.705	0.348824
YOR078W	BUD21	telomere maintenance*	snoRNA binding	0	-1.64	-1.09	-0.52	-0.27	-0.01	0.04	0.04	0.33	0.055	-1.825	-1.335	-0.745	-0.875	-0.665	-0.635	-0.575	-0.645	0.33	0.04	-0.09	-0.49	-0.47	-0.54	-0.26	-0.3	-0.31	-0.57	-0.35	-0.38	-0.38	-0.36	-0.01	-0.47	-0.2	0.19	0.39	0.45	-0.03	0.42	0.41	0.47	0.32	0.48	0.15	-0.092333
YOR098C	NUP1	transport*	protein binding*	0	-1.2	-1.1	-0.71	-0.79	-0.16	-0.14	0.32	0.48	-0.23	-1.69	-1.16	-1.21	-0.94	-0.63	-0.69	-0.7	-0.5	0.035	-0.395	-0.415	-0.815	-1.215	-0.925	-0.775	-0.735	-0.495	-0.1	-0.27	0.23	0.43	0.3	0.19	0.52	0.37	-0.56	-0.47	-0.5	0.3	-1.345	-1.045	-0.905	-0.915	-0.345	-0.395	0.09
YOR116C	RPO31	transcription*	transferase activity*	0	-1.6	-1.19	-0.83	-0.26	-0.14	-0.05	0.01	-0.05	0.165	-2.585	-1.575	-0.845	-0.685	-0.555	-0.575	-0.655	-0.735	0.37	0.01	-0.24	-0.52	-0.02	0.08	0.22	0.37	0.41	-0.11	-0.13	-0.26	-0.15	0.21	0.34	-0.29	-0.02	-0.29	-0.31	-0.09	0.14	0.72	0.81	0.73	0.8	0.87	1.16	0.116197
YOR119C	RIO1	cell cycle*	nucleotide binding*	0	-0.61	-0.29	-0.17	0.87	0.71	0.32	-0.05	-0.02	-0.205	-2.595	-1.035	-0.005	0.375	0.205	0.165	0.245	0.275	0.16	-0.42	-0.71	-0.51	0.99	1.14	1.28	1.35	1.42	0.03	-0.01	0.24	0.07	-0.03	0.16	-0.38	-0.61	-0.25	0.05	0.08	-0.02	0.92	0.83	0.86	0.9	0.95	1.23	0.535685
YOR127W	RGA1	signal transduction*	metal ion binding*	0	-0.07	-0.3	-0.37	-0.22	-0.16	-0.2	0	-0.04	-0.075	-0.125	-0.625	-0.835	-0.685	-0.545	-0.435	-0.335	-0.045	0.11	0.17	-0.1	-0.43	-0.12	0.05	0.1	0.02	0.23	-0.06	0.04	0	0.02	0.11	0.1	0.41	0.06	0.11	0.02	0.14	0.19	0.695	0.735	0.605	0.775	0.565	0.605	-0.138207
YOR144C	ELG1	cell cycle*	molecular_function	0	-1.44	-0.61	-0.55	-0.57	-0.76	-1.28	-1.49	-1.75	0.09	-0.38	-0.26	-0.47	-0.19	-0.14	-0.27	-0.32	-0.53	0.135	-0.015	0.175	-0.195	-0.395	-0.165	0.035	-0.025	0.165	-0.6	-0.48	-0.49	-0.28	-0.13	-0.14	-0.16	-0.33	-0.05	0.03	0.14	0.01	0.35	0.25	0.23	0.29	0.2	0.18	-0.501555
YOR151C	RPB2	transcription*	transferase activity*	0	-0.19	-0.48	-0.55	-0.44	-0.12	0.03	-0.05	0.17	0.19	-0.17	-0.54	-0.63	-0.49	-0.4	-0.51	-0.58	-0.66	0.175	0.335	0.145	-0.345	-0.545	-0.635	-0.525	-0.585	-0.635	-0.33	-0.25	0.01	-0.08	-0.13	-0.18	-0.22	-0.17	0.24	0.15	0.29	0.14	0.535	0.605	0.795	0.745	0.825	0.885	0.01
YOR154W	SLP1	biological_process	molecular_function	0	-0.91	-0.63	-0.23	0.25	0.29	0.29	-0.51	0.5	-0.295	-0.465	0.255	0.245	0.815	0.545	0.625	0.315	-0.015	-0.1	-0.25	-0.4	-0.05	-0.17	-0.22	-0.24	-0.33	-0.24	-0.15	0.06	-0.18	-0.24	-0.2	-0.12	0.49	0.4	0.53	0.29	0.21	-0.01	-0.085	-0.155	-0.195	-0.055	-0.355	-0.575	0.4
YOR160W	MTR10	protein import into nucleus*	binding*	0	-0.06	-0.14	-0.32	0.25	0.08	-0.21	-0.55	-0.96	0.09	-0.19	0.06	0.31	0.35	0.23	0.04	-0.01	-0.35	0.18	0.2	0.16	0.23	0.49	0.33	0.45	0.57	0.6	-0.15	-0.08	0.05	0.19	0.19	0.17	0.35	0.53	0.62	0.42	0.36	0.4	0.035	0.205	0.105	0.185	0.075	0.265	0.4
YOR166C	SWT1	transcription*	molecular_function	0	-0.44	-0.47	-0.64	-0.41	-0.21	0.05	0.03	-0.2	0.075	-0.345	-0.705	-0.275	-0.465	-0.615	-0.765	-0.945	-1.365	0.105	-0.105	-0.265	-0.775	-0.455	-0.335	-0.305	-0.075	-0.145	-0.28	-0.28	-0.4	-0.32	-0.3	-0.15	-0.31	-0.17	0.28	-0.01	-0.01	-0.2	-0.14	-0.06	0.04	-0.04	0.04	-0.17	0.616875
YOR179C	SYC1	mRNA processing*	RNA binding	0	0.28	0.12	0.17	-0.2	-0.44	-0.67	-0.76	-0.74	-0.11	0.95	0.55	0.43	0.61	0.71	0.89	1.03	1.54	0.11	-0.03	0.04	-0.23	0.44	0.94	1.05	1.36	1.05	0.37	0.64	0.47	0.53	0.27	0.36	-0.29	-0.39	0.61	0.54	0.73	0.19	1.425	0.875	0.855	1.025	0.885	0.935	-0.130106
YOR182C	RPS30B	translation*	structural constituent of ribosome	0	-1.74	-2.27	-1.79	-0.46	0.83	1.58	1.24	1.56	-0.62	-4.16	-3.03	-1.83	-0.23	0.15	0.09	-0.1	0.44	-0.07	-0.21	-0.78	-2.97	-0.74	0.31	0.28	-0.17	1.19	-0.58	-0.2	-0.28	-0.39	0.08	0.03	-1.81	-1.64	-0.16	0.25	0.32	0.17	-1.285	-1.595	-1.185	-0.545	-0.715	-0.425	-0.314251
YOR188W	MSB1	establishment of cell polarity	molecular_function	0	-1.67	-0.77	-0.54	-0.68	-0.43	-0.61	-0.46	-0.32	0.025	-1.035	-0.475	-0.695	-0.295	-0.245	-0.255	-0.235	-0.365	0.185	-0.255	-0.155	-0.845	-0.985	-0.805	-0.755	-0.795	-0.605	-0.3	-0.32	-0.13	-0.15	0.12	-0.01	0.8	0.6	-0.23	-0.23	0.01	0.17	0.005	0.195	0.125	0.185	0.195	0.355	-0.568486
YOR207C	RET1	transcription*	transferase activity*	0	-1.77	-1.25	-0.81	-0.54	-0.19	-0.35	-0.35	-0.36	0.045	-3.085	-1.755	-0.995	-0.955	-0.835	-0.775	-0.805	-0.775	0.21	-0.17	-0.38	-0.8	-0.49	-0.33	-0.27	-0.16	0.03	-0.13	-0.05	-0.12	-0.15	0.12	0.13	-0.21	-0.03	0.28	0.13	0.25	0.24	-0.335	-0.085	0.205	0.345	0.255	0.535	0.18
YOR212W	STE4	signal transduction*	signal transducer activity	0	-0.39	-0.53	-0.9	-0.53	-0.39	-0.6	-1.16	-1.02	0.095	-0.165	-0.245	-0.685	-0.775	-0.755	-0.615	-0.635	-0.635	0.185	0.335	0.155	-0.235	-0.785	-0.675	-0.605	-0.465	-0.325	-0.91	-0.42	-0.31	-0.36	-0.25	-0.04	-0.89	-0.61	0.18	0.26	0.22	0.01	-0.295	-0.005	0.155	0.105	0.285	-0.345	-0.366323
YOR217W	RFC1	cell cycle*	nucleotide binding*	0	-0.52	-0.53	-0.66	-0.5	-0.21	-0.05	0	-0.26	-0.135	-0.615	-0.675	-0.855	-0.475	-0.385	-0.435	-0.495	-0.555	-0.035	-0.105	-0.155	-0.685	-0.225	0.065	0.115	0.155	0.235	-0.8	-0.85	-0.76	-0.51	-0.15	-0.17	0.17	-0.33	-0.73	-0.78	-0.19	-0.09	-1.22	-0.95	-1.11	-1.03	-0.75	-0.73	-0.03
YOR238W	YOR238W	biological_process	molecular_function	0	-0.02	-0.02	-0.28	-0.02	-0.36	-0.47	-0.65	-1.56	0.12	0.76	0.28	-0.18	-0.49	-0.49	-0.42	-0.4	-0.52	0.09	-0.13	-0.27	-0.7	-1.05	-0.76	-0.8	-0.87	-0.96	0.08	0.35	0.13	-0.09	-0.13	0.09	-0.52	-0.5	0.45	0.66	0.46	0.08	-0.995	-1.095	-0.925	-0.795	-0.925	-1.205	0.228271
YOR274W	MOD5	tRNA processing*	nucleotide binding*	0	-0.74	-0.37	-0.26	-0.27	-0.14	-0.03	-0.3	0.06	0.13	0.33	-0.09	0.09	-0.05	-0.02	0	0.03	0.03	0.155	0.015	-0.145	0.415	0.705	0.475	0.615	0.555	0.565	-0.02	0.08	0.13	0.1	-0.06	0.07	0.73	0.47	0.7	0.5	0.43	0.04	1.66	1.39	1.08	0.85	0.73	0.38	0.0559323
YOR278W	HEM4	porphyrin biosynthetic process*	lyase activity*	0	0.51	0.08	0.13	-0.68	-0.69	-0.83	-0.53	-0.55	0.03	0.45	0.09	-0.26	-0.64	-0.25	-0.31	-0.17	-0.14	0.07	0.16	0.19	-0.25	-1.07	-1.1	-0.95	-0.94	-0.9	0.02	0.32	0.38	0.46	0.37	0.46	-0.67	-0.04	0.49	0.37	0.19	0.36	0.045	-0.015	-0.045	0.145	0.035	0.065	0.642507
YOR279C	RFM1	telomere maintenance*	unfolded protein binding	0	0.23	0.06	-0.1	0.24	0.15	-0.03	-0.48	-0.72	0.1	1.08	0.59	0.57	0.47	0.45	0.42	0.45	0.19	0.13	0.19	0.21	0.25	0.54	0.71	0.76	0.73	0.48	0.17	0.06	-0.07	-0.03	-0.16	-0.04	0.99	0.66	0.31	0.67	0.51	0.18	0.72	0.67	0.56	0.33	0.46	0.18	-0.914025
YOR307C	SLY41	transport*	molecular_function*	0	-0.91	-0.64	-0.22	-0.07	0.18	0.23	0.28	0.01	-0.13	-0.76	-0.49	-0.63	-0.55	-0.55	-0.58	-0.54	-0.49	-0.115	-0.325	-0.285	-0.105	0.355	0.635	0.655	0.365	0.275	-0.55	-0.41	-0.2	-0.22	-0.21	-0.14	-0.27	0.05	0.27	0.15	0.14	0.22	-0.155	-0.075	-0.155	0.005	-0.045	-0.045	0.110119
YOR308C	SNU66	mRNA processing*	RNA splicing factor activity, transesterification mechanism	0	-0.65	-0.49	-0.45	-0.19	-0.15	-0.2	-0.15	-0.03	-0.065	-0.645	-0.495	0.005	0.195	0.215	0.145	0.145	0.245	0.105	-0.255	-0.255	-0.225	0.295	0.375	0.615	0.805	0.575	-0.07	-0.2	0.13	0.16	-0.07	0.08	1.01	0.6	0.05	0.12	0.01	-0.03	0.33	0.56	0.39	0.3	0.46	0.44	0.173209
YOR322C	LDB19	cell cycle*	molecular_function	0	-0.16	-0.15	-0.19	0.19	0.33	0.4	0.77	0.87	0.035	-0.135	-0.215	-0.065	0.035	0.035	-0.095	-0.165	0.015	0.09	0.13	-0.02	-0.08	0.13	0.14	2.78e-17	0.02	-0.01	0.12	-0.08	0.18	0.2	0.15	0.13	0.51	0.15	-0.52	-0.52	-0.36	0.11	-0.315	-0.355	-0.505	-0.355	-0.335	-0.135	0.11
YOR332W	VMA4	transport*	hydrolase activity*	0	0.51	0.2	-0.07	-0.4	-0.38	-0.29	-0.5	-0.86	0.465	1.845	1.135	1.125	0.575	0.585	0.655	0.705	0.585	0.035	0.135	0.525	0.585	-0.205	-0.245	-0.005	0.375	0.055	-0.13	-0.27	-0.09	-0.14	-0.22	-0.23	1.18	1.27	1.19	0.62	0.64	0.28	-0.135	0.165	0.015	-0.245	-0.105	-0.195	0.347679
YOR337W	TEA1	transcription*	metal ion binding*	0	-2.36	-1.71	-0.92	-1.5	-1.63	-2.52	-2.71	-2.64	-0.035	-0.595	-0.225	0.865	0.935	0.735	0.685	0.615	0.595	0.085	-0.425	-0.515	-0.365	0.615	0.465	0.225	-0.095	-0.525	0.57	0.4	0.12	-0.26	-0.22	0.02	1.13	0.66	0.12	-0.13	-0.04	0.3	-0.365	-0.565	-0.915	-0.995	-0.925	-0.805	0.0348715
YOR370C	MRS6	intracellular protein transport*	GTPase activator activity*	0	-0.22	-0.22	-0.24	-0.05	0.23	0.17	0.33	0.69	0.05	-1.29	-0.86	-0.57	-0.65	-0.78	-0.85	-0.96	-0.92	0.135	0.185	0.015	-0.215	0.135	-0.015	-0.155	-0.175	0.065	-0.29	-0.18	0.08	0.08	0.21	0.24	0.26	0.02	-0.25	-0.07	0.02	0.35	-0.25	-0.1	-0.21	-0.04	-0.06	0.1	-0.48691
YPL023C	MET12	methionine metabolic process	oxidoreductase activity*	0	-0.01	-0.24	-0.17	0.4	0.62	0.91	1.27	1.31	0.24	0.64	0.27	0.25	0.12	0.09	0.14	0.13	2.78e-17	0.125	0.175	-0.015	-0.225	-0.365	-0.315	-0.405	-0.305	-0.355	0.18	0.01	0.29	0.33	0.2	0.09	0.74	0.6	0	0.01	0.13	0.4	-0.46	-0.27	-0.32	-0.25	-0.18	-0.1	-0.194245
YPL038W	MET31	transcription*	metal ion binding*	0	-1.13	-2.06	-0.68	-0.93	-0.34	-0.29	-0.17	0.31	-0.09	-0.29	-0.81	-0.61	-0.42	-0.48	-0.67	-0.78	-0.71	0.175	-0.165	-0.605	-0.995	-0.165	0.245	0.245	0.215	0.275	0.14	0.44	-0.11	-0.5	-0.53	-0.33	-0.8	-0.69	-0.16	-0.31	-0.28	-0.7	-0.065	-0.045	0.085	0.115	-0.095	-0.405	-0.664259
YPL042C	SSN3	transcription*	nucleotide binding*	0	-0.08	-0.2	-0.25	-0.25	-0.34	-0.33	-0.04	-0.28	-0.04	0.02	-0.48	-0.24	-0.41	-0.52	-0.63	-0.65	-0.78	-0.005	-0.045	-0.275	-0.365	-0.215	-0.375	-0.325	-0.095	-0.385	-0.23	-0.22	-0.25	-0.08	-0.12	-0.16	0.58	0.54	-0.02	-0.3	-0.33	-0.19	-0.275	-0.315	-0.545	-0.595	-0.455	-0.365	-0.774486
YPL046C	ELC1	RNA elongation from RNA polymerase II promoter*	ubiquitin-protein ligase activity*	0	0.84	0.57	0.24	0.32	0.18	0.29	0.5	0.67	-0.025	0.705	0.435	0.345	0.335	0.335	0.425	0.425	0.665	0.235	0.355	0.455	0.795	0.735	0.715	0.525	0.635	0.555	0.26	0.53	-0.02	-0.2	0.12	0.07	-0.33	-0.06	0.94	0.62	0.4	0.07	0.93	0.83	0.8	0.95	0.6	0.94	0.0480948
YPL047W	SGF11	transcription*	molecular_function	0	-0.92	-0.74	-0.66	-0.66	-0.64	-0.66	0.32	-0.65	-0.145	1.345	0.025	-0.035	-0.135	-0.375	-0.365	-0.485	-0.455	-0.005	-0.335	-0.055	-0.375	-0.225	-0.165	-0.365	0.135	-0.165	-0.34	0.09	-0.37	-0.23	-0.13	0.01	-0.69	-0.55	0.11	0.1	0.13	0.32	-0.4	-0.47	-0.47	-0.18	-0.14	0.01	-0.125169
YPL051W	ARL3	transport*	nucleotide binding*	0	-0.31	-0.39	-0.28	0.03	0.13	0.34	0.16	1.06	-0.165	0.205	-0.045	-0.125	0.165	0.545	0.635	0.595	0.985	0.07	0.07	-0.04	-0.12	0.11	0.5	0.53	0.46	0.44	0.28	0.35	0.07	-0.31	-0.07	-0.09	-0.63	-0.11	0.9	0.8	0.5	-0.04	0.785	0.385	0.345	0.625	0.415	0.485	0.256294
YPL055C	LGE1	transcription*	molecular_function	0	-0.33	-0.58	-0.61	0.1	0.58	0.55	0.59	1.19	-0.105	-0.395	-0.625	-0.525	-0.075	-0.045	0.005	-0.055	0.315	0.065	0.115	-0.085	-0.135	0.445	0.395	0.375	0.215	0.325	0.1	-0.02	0.22	0.13	0.15	0.23	0.42	0.02	-0.31	-0.45	-0.1	0.23	-0.635	-0.645	-0.555	-0.615	-0.395	-0.505	0.221866
YPL058C	PDR12	transport*	nucleotide binding*	0	-2.09	-2.31	-1.8	-2.29	-1.75	-1.52	-1.05	-0.63	-0.875	-0.755	-1.225	-0.555	0.335	0.355	0.095	0.185	0.755	-0.46	-0.57	-0.39	-0.55	0.79	0.86	1.06	1.08	1.57	2.38	2.17	1.2	-0.26	-0.85	-0.81	-0.68	-0.82	-1.25	-1.91	-1.75	-1.66	2.81	2.99	2.63	2.41	1.54	1.61	0.00956418
YPL069C	BTS1	transport*	transferase activity*	0	-0.56	-0.94	-0.72	-1.12	-0.9	-0.72	-0.34	-0.52	0.065	-0.165	-0.375	-0.355	-0.365	-0.255	-0.315	-0.295	-0.325	0.17	-0.25	-0.25	-0.62	-0.55	-0.49	-0.46	-0.31	-0.36	-0.02	-0.18	0.08	0.28	-0.04	0.09	-0.21	-0.34	0.14	0.08	0.02	0.11	-0.335	-0.315	-0.415	-0.315	-0.365	-0.235	0.61
YPL083C	SEN54	tRNA processing*	tRNA-intron endonuclease activity	0	-0.43	-0.29	-0.5	-0.14	0.17	0.55	0.69	0.77	-0.04	-0.31	-0.74	-0.92	-0.65	-0.4	-0.4	-0.4	-0.37	0.04	0.01	0.02	-0.48	-0.49	-0.31	-0.18	-0.29	-0.11	0.16	-0.01	-0.09	-0.15	-0.09	0.13	-0.09	-0.49	0.07	-0.03	0.09	-0.06	0.01	0.09	0.16	0.06	0.06	-0.07	0.255017
YPL088W	YPL088W	aldehyde metabolic process	oxidoreductase activity*	0	-0.18	-0.14	-1.38	-1.35	-1.22	-0.99	-0.84	-0.64	0.13	0.84	0.94	0.71	0.02	0.42	0.47	0.39	0.49	-0.605	-0.615	-0.035	0.525	0.925	1.395	2.065	1.685	1.135	0.42	1.02	1.15	0.98	0.12	0.12	1.4	0.72	1.11	0.62	0.83	0.66	0.16	0.06	-0.21	-0.23	-0.29	-0.62	-0.0953593
YPL101W	ELP4	transcription*	molecular_function	0	-1.3	-1.03	-0.41	-0.43	-0.35	-0.25	-0.14	-0.3	-0.01	-0.63	-0.14	0.07	0.32	0.53	0.55	0.59	0.28	0.105	-0.175	-0.235	0.015	-0.105	-0.075	0.025	0.235	0.045	0.19	0	0.02	0.06	-0.2	-0.16	0.92	0.74	0.07	-0.43	-0.39	-0.22	0.005	0.225	-0.065	-0.235	-0.005	-0.195	-0.03
YPL105C	YPL105C	biological_process	molecular_function	0	-0.42	-0.7	-0.49	-0.45	-0.44	-0.29	0.09	-0.2	-0.01	-0.4	-0.49	-0.68	-0.41	-0.44	-0.51	-0.6	-0.58	0.19	-0.07	-0.21	-0.68	-0.87	-0.97	-1.01	-1.1	-1.03	-0.35	-0.5	0.21	0.1	-0.01	0.05	0.45	0.23	-0.47	-0.44	-0.17	-0.09	-1.265	-0.795	-0.745	-0.715	-0.485	-0.615	-0.42
YPL106C	SSE1	telomere maintenance*	nucleotide binding*	0	-0.57	-0.4	-0.94	-0.15	-0.55	-1.01	-1.41	-1.78	0.25	-0.6	-0.72	0.81	0.86	0.56	0.48	0.44	0.16	0.16	0.51	0.67	0.44	0.74	0.41	0.46	0.46	-0.16	0.83	0.12	-0.02	0.03	0.03	0.13	0.68	-0.31	-0.64	-0.57	-0.21	-0.04	0.865	0.525	0.145	-0.105	0.125	0.075	1.11634
YPL122C	TFB2	transcription*	general RNA polymerase II transcription factor activity*	0	-0.64	-0.89	-0.9	-0.43	-0.5	-0.17	0.28	0.14	-0.015	-0.545	-0.745	-0.635	-0.555	-0.605	-0.665	-0.685	-0.825	0.12	-0.14	-0.31	-0.83	-0.61	-0.59	-0.58	-0.44	-0.48	-0.4	-0.4	-0.51	-0.5	-0.35	-0.21	-0.57	-0.74	-0.11	-0.16	-0.1	-0.25	-0.3	-0.33	-0.37	-0.28	-0.34	-0.74	0
YPL128C	TBF1	transcription*	DNA binding*	0	-0.77	-0.65	-0.65	-0.94	-0.54	-0.41	-0.13	0.01	0.055	-0.385	-0.085	-0.385	-0.275	-0.295	-0.225	-0.255	-0.095	0.185	-0.105	0.075	-0.425	-0.735	-0.095	0.155	0.025	0.125	-0.39	-0.46	-0.28	-0.03	-0.03	-0.01	0.33	0.33	-0.56	-0.28	-0.51	0.23	-0.345	-0.185	-0.055	0.185	0.485	0.525	-0.91
YPL137C	GIP3	chromosome segregation*	protein phosphatase type 1 regulator activity*	0	-0.51	-0.49	-0.24	-0.32	-0.13	-0.63	-0.58	-0.52	-0.06	0.31	0.65	0.71	0.46	0.34	0.23	0.09	-0.19	-0.265	-0.035	0.165	0.475	0.895	1.185	1.085	0.835	0.915	0.55	0.51	0.37	0.16	0.29	0.38	0.58	0.26	0.4	0.29	0.15	0.27	0.495	0.245	0.165	0.245	-0.105	0.055	0.399488
YPL157W	TGS1	ribosome biogenesis and assembly*	transferase activity*	0	-1.73	-1.27	-0.81	-0.93	-0.65	-0.53	-0.68	-0.38	-0.1	-1.04	-0.71	-0.26	-0.26	0.05	0.06	0.13	-0.28	-0.07	-0.44	-0.86	-0.82	-0.86	-0.92	-0.69	-0.55	-0.82	-0.21	-0.31	-0.2	-0.07	-0.2	-0.03	-0.1	-0.49	-0.38	-0.04	-0.19	-0.21	-0.815	-0.715	-0.625	-0.695	-0.285	-0.725	0.242995
YPL169C	MEX67	transport*	RNA binding*	0	-0.57	-0.7	-0.74	-0.27	-0.29	-0.29	-0.18	-0.18	0.03	-0.63	-0.64	-0.62	-0.14	-0.05	-0.1	-0.23	-0.18	0.13	-0.01	-0.06	-0.42	-0.41	-0.37	-0.4	-0.66	-0.5	-0.48	-0.42	-0.18	-0.02	-0.02	0.06	0.03	0.02	-0.58	-0.53	-0.35	0.21	-0.755	-0.625	-0.765	-0.655	-0.505	-0.545	-0.480224
YPL181W	CTI6	transcription*	metal ion binding*	0	0.45	1.04	0.92	0.95	1.09	0.82	0.69	0.53	0.21	0.3	0.47	0.52	0.53	0.78	0.83	0.87	0.63	0.155	0.095	0.175	0.365	0.595	0.655	0.745	0.735	0.565	0.21	0.11	0.4	0.42	0.01	-0.31	0.84	0.5	-0.32	-0.23	-0.18	-0.39	-0.7	-0.24	-0.24	-0.34	-0.32	-0.79	-0.961793
YPL189W	GUP2	transport*	symporter activity*	0	-0.84	0	-0.39	-0.02	0.72	0.84	1.05	0.9	-0.41	0.81	0.33	0.5	0.31	0.86	0.79	0.99	0.93	-0.395	-0.605	-0.355	0.055	0.325	0.595	0.645	0.585	0.625	0.07	0.13	-0.52	-0.25	0.48	0	-0.53	-0.38	0.56	0.38	0.31	0	0.76	0.77	0.64	0.79	0.74	1.11	-0.644051
YPL202C	AFT2	transcription*	transcription factor activity*	0	-0.52	-0.54	-0.43	-0.39	0.1	0.34	1.14	1.93	-0.05	-0.26	-0.51	-0.12	0.41	0.43	0.39	0.37	0.78	0.035	-0.405	-0.615	-0.085	0.595	0.885	0.765	0.655	0.765	0.42	0.13	0.27	0.14	-0.24	0.14	-0.07	-0.11	0.16	0.15	0.24	0.24	-0.32	-0.67	-0.47	-0.49	-0.58	-0.95	-0.918422
YPL204W	HRR25	response to DNA damage stimulus*	nucleotide binding*	0	-0.09	-0.31	-0.48	-0.42	-0.39	-0.46	-0.27	-0.21	0.08	-0.13	-0.18	-0.35	-0.35	-0.46	-0.43	-0.48	-0.39	0.13	0.21	0.22	0.22	0.11	0.04	-0.11	-0.2	-0.1	-0.16	-0.2	0.17	0.28	0.07	0.05	0.14	0.04	-0.4	-0.27	-0.16	0.08	-0.41	-0.44	-0.55	-0.47	-0.37	-0.53	-0.558868
YPL213W	LEA1	telomere maintenance*	RNA splicing factor activity, transesterification mechanism	0	-0.21	-0.2	-0.23	-0.25	0	0.06	0.33	1.15	0.18	1.33	1.01	0.85	0.62	0.66	0.65	0.54	0.68	0.145	0.305	0.145	0.545	0.395	0.105	0.105	-0.065	0.265	0.28	0.47	0.59	0.48	0.23	0.36	0.26	0.44	1.38	1.26	1.08	0.87	0.26	0.05	-0.01	0.2	0.05	-0.36	-0.377975
YPL232W	SSO1	intracellular protein transport*	protein transporter activity*	0	0.46	0.05	0	-0.14	0.05	0.22	0.29	0.43	0.16	0.46	0.25	-0.17	0.09	0.59	0.88	0.98	1.13	0.14	0.15	0.13	0.17	-0.14	0.3	0.52	0.66	0.67	0.2	0.14	0.51	0.35	-0.24	-0.26	0.69	0.07	-0.12	-0.4	-0.32	-0.3	-0.485	-0.295	-0.385	-0.565	-0.445	-0.945	-1.06
YPL233W	NSL1	cell cycle*	molecular_function	0	-0.76	-0.33	-0.62	-0.36	-0.31	-0.23	-0.25	-0.49	-0.145	0.515	-0.115	-0.535	-0.535	-0.195	-0.365	-0.275	-0.585	-0.065	-0.345	-0.405	-0.535	-0.625	-0.835	-0.765	-0.835	-0.935	-0.39	-0.31	-0.21	0.01	-0.33	-0.25	-0.46	-0.48	-0.3	-0.29	-0.14	-0.18	0.275	0.375	0.285	0.485	0.475	0.265	-0.52
YPL235W	RVB2	transcription*	nucleotide binding*	0	-0.27	-0.34	-0.45	-0.72	-0.51	-0.55	-0.72	-0.58	0.1	-0.57	-0.67	-1.05	-1.3	-1.24	-1.15	-1.1	-1.09	0.255	0.125	0.145	-0.025	-0.415	-0.425	-0.435	-0.375	-0.405	-0.14	-0.22	-0.05	0.06	-0.07	0.07	0.09	0.03	0	0.03	0.09	-0.06	-0.165	0.025	0.075	-0.165	-0.075	0.045	-0.550007
YPL274W	SAM3	transport*	amino acid transmembrane transporter activity*	0	0.42	0.51	0.3	1.22	1.07	0.38	-0.04	-0.23	-0.6	-1.58	-0.76	-0.3	-0.75	-0.97	-0.89	-0.86	-0.44	-0.075	-0.075	-0.925	0.165	-0.675	-1.325	-1.615	-1.525	-1.285	0.85	0.97	0.8	0.54	0.8	0.58	-0.99	-0.71	-0.81	-0.41	-0.09	0.6	-1.035	-0.065	-0.035	0.485	0.625	0.555	-0.287611
YPR016C	TIF6	translation*	translation initiation factor activity*	0	-1.04	-0.74	-0.52	-0.1	0.15	0.02	0.09	-0.13	-0.03	-1.57	-1.01	-0.6	-1.01	-0.88	-1	-0.89	-1.22	0.125	0.065	-0.205	-0.475	-0.665	-0.785	-0.825	-0.785	-0.625	0.19	-0.05	0.04	0.35	0.18	0.11	-0.1	0.07	0.28	0.34	0.08	0.11	0.3	0.33	0.17	0.38	0.4	0.34	-0.419468
YPR018W	RLF2	chromatin silencing at silent mating-type cassette*	transcription regulator activity	0	-1.11	-0.76	-0.8	-0.85	-0.57	-0.27	-0.02	0.07	-0.105	-0.535	-0.825	-1.235	-0.495	-0.205	-0.255	-0.095	0.115	-0.16	-0.45	-0.45	-0.9	-1	0.17	0.34	0.54	0.22	-0.69	-0.9	-0.95	-0.78	-0.62	-0.52	0.45	0.08	-0.72	-0.52	-0.38	-0.39	0	0.12	0.13	-0.02	0	-0.26	-0.293322
YPR019W	MCM4	transcription*	nucleotide binding*	0	-0.19	-0.12	0.15	0.04	0.08	0.13	0.12	0.02	0.22	0.24	0.32	0.15	0.23	0.24	0.15	0.12	-0.03	0.365	0.335	0.205	0.165	-0.275	-0.015	0.045	0.145	0.245	0.19	-0.05	0.19	0.34	0.16	0.04	0.79	0.51	-0.51	-0.47	-0.52	0.06	0.09	-0.04	-0.2	-0.12	0.04	0.16	0.28894
YPR036W	VMA13	transport*	hydrolase activity*	0	0.32	0.36	-0.07	-0.28	-0.36	-0.8	-1.07	-2.36	0.265	1.405	0.785	0.585	0.005	0.255	0.265	0.295	0.145	-0.165	-0.155	0.105	0.255	-0.295	-0.675	-0.765	-0.705	-0.825	-0.75	-0.12	-0.07	0.02	-0.32	-0.41	0.11	-0.16	-0.26	-0.42	0.18	0.13	-0.545	-0.385	-0.605	-0.635	-0.475	-0.725	0.641748
YPR065W	ROX1	transcription*	DNA binding*	0	-0.73	-0.03	-0.1	-0.22	-0.42	-0.52	-0.01	0.52	0.01	-0.22	0.16	0.77	0.41	-0.43	-0.73	-0.83	-0.9	0.055	-0.145	-0.375	-0.015	0.385	0.255	0.365	0.535	0.435	0.27	-0.39	0.09	0.05	-0.11	-0.17	1.22	0.85	-0.37	-0.4	-0.54	-0.11	-0.32	-0.62	-0.69	-0.76	-0.8	-0.6	0.234386
YPR070W	MED1	transcription*	RNA polymerase II transcription mediator activity	0	0.05	-0.1	-0.24	-0.33	-0.34	-0.27	-0.24	-0.22	0.15	-0.19	-0.37	-0.36	-0.52	-0.43	-0.51	-0.4	-0.45	0.265	0.295	0.175	-0.135	-0.215	-0.215	-0.265	-0.065	-0.225	-0.38	-0.4	-0.25	-0.29	-0.38	-0.23	0.05	0.23	0.54	0.3	0.27	0.01	-0.45	-0.32	-0.14	-0.15	-0.08	-0.33	0.06
YPR088C	SRP54	protein targeting*	nucleotide binding*	0	-0.18	0.08	-0.14	0.14	0.36	0.53	0.52	0.66	0.13	0	-0.05	-0.29	-0.4	-0.15	-0.03	-0.07	-0.07	0.125	0.055	0.055	-0.255	-0.455	-0.405	-0.305	-0.295	-0.285	-0.44	-0.47	-0.16	-0.1	-0.24	-0.32	0.08	0.01	-0.03	-0.23	0	-0.26	-1.07	-0.64	-0.46	-0.39	-0.08	-0.38	-0.42
YPR094W	RDS3	mRNA processing*	transcription activator activity	0	0	-0.1	-0.06	-0.39	-0.46	-0.14	-0.1	0.77	-0.205	0.235	-0.085	-0.115	-0.095	-0.395	-0.465	-0.355	-0.265	0.215	0.345	0.155	0.105	-0.175	0.035	0.075	0.005	0.495	-0.14	0.02	-0.2	-0.21	0.17	-0.07	-0.64	-0.57	0.42	0.49	0	-0.24	0.83	0.68	0.91	0.74	0.79	0.8	0.05
YPR120C	CLB5	cell cycle*	cyclin-dependent protein kinase regulator activity	0	-1.37	-0.34	-0.31	-0.42	-0.25	0.03	0.26	1.19	0.1	0.4	0.15	-0.59	-0.87	-0.71	-0.69	-0.63	-0.71	-0.105	-0.095	-0.055	-0.565	-1.405	-1.325	-1.425	-1.525	-1.085	0.14	0.22	-0.03	0.03	0.2	0.2	0.51	0.48	0.48	0.43	0.24	0.23	0.14	0.22	0.16	0.35	0.04	0.25	-0.458646
YPR142C	YPR142C	biological_process	molecular_function	0	-0.3	-0.68	-0.58	-0.18	-0.25	-0.06	-0.4	0.49	-0.23	-0.45	-0.04	-0.49	0.08	-0.44	-0.17	-0.48	-0.55	0.07	-0.04	-0.03	-0.32	-0.48	-0.56	-0.69	-0.68	-0.68	-0.1	-0.56	-0.52	-0.3	-0.11	0.16	-0.54	-0.33	-0.12	0.13	-0.15	0.18	-0.68	-0.54	-0.25	-0.16	-0.33	0.14	-0.265242
YPR161C	SGV1	transcription*	nucleotide binding*	0	-0.22	-0.12	-0.09	0.19	0.38	0.39	0.51	0.75	0.04	-0.7	-0.33	-0.32	0.1	0.2	0.22	0.15	0.33	0.21	0.15	0.14	0.08	0.24	0.53	0.5	0.39	0.44	0.15	-0.01	0.35	0.32	0.14	0.02	0.52	0.26	0.09	-0.06	-0.02	-0.03	-0.01	-0.05	-0.22	-0.21	-0.22	-0.21	-0.3
YPR162C	ORC4	DNA replication*	DNA binding*	0	-0.21	-0.35	-0.6	-0.56	-0.73	-0.78	-0.66	-1.39	0.12	0.23	0.08	0.12	-0.02	0.02	-0.05	-0.05	-0.3	0.21	0.04	-0.02	-0.32	-0.44	-0.48	-0.45	-0.45	-0.63	-0.23	-0.29	0.03	0.01	0.08	0.15	-0.01	0.27	0.47	0.31	0.25	0.33	-0.235	-0.285	-0.175	-0.125	-0.095	-0.265	0.41
YPR169W	JIP5	protein monoubiquitination	molecular_function	0	-0.98	-1.07	-0.84	-0.29	-0.31	-0.57	-0.96	-0.87	-0.1	-1.11	-1.37	-0.68	-0.38	-0.43	-0.26	-0.11	0.09	0.1	-0.25	-0.54	-0.99	-0.44	-0.4	-0.19	-0.32	-0.18	-0.58	-0.51	-0.55	-0.46	-0.31	-0.24	-0.51	-0.82	-0.51	-0.36	-0.15	-0.38	0.03	-0.04	0.13	0.04	0.09	0.26	0.02
YPR186C	PZF1	transcription*	metal ion binding*	0	-1.19	-1.12	-1.12	-1.24	-1	-0.58	-0.75	-0.2	-0.02	-0.67	-0.85	-0.57	-0.58	-0.67	-0.77	-0.7	-0.67	0.225	-0.085	-0.295	-0.325	-0.015	-0.205	0.035	0.145	-0.045	-0.27	-0.12	-0.45	-0.55	-0.37	-0.22	-0.2	-0.22	0.45	-0.01	0.18	-0.26	0.805	0.515	0.595	0.655	0.425	0.545	-0.285303
YPR189W	SKI3	mRNA catabolic process*	binding*	0	0.22	0.12	-0.03	-0.08	-0.03	-0.28	-0.18	-0.18	0.28	0.65	0.52	0.32	0.49	0.52	0.27	0.22	0.23	0.525	0.575	0.665	0.555	0.465	0.585	0.735	0.745	0.815	-0.02	0.05	0.05	0.09	-0.17	-0.1	0.28	0.27	0.65	0.75	0.36	0.07	0.405	0.525	0.615	0.655	0.565	0.195	0.2
YAL019W	FUN30	chromosome organization and biogenesis (sensu Eukaryota)	molecular_function*	0	-1.87	-1.39	-0.99	-0.52	-0.15	-0.29	-0.28	0.03	0.075	-3.005	-1.975	-1.485	-1.005	-0.875	-0.925	-0.945	-0.685	0.33	-0.15	-0.29	-1.11	-0.47	-0.14	-0.04	-0.14	0.06	-0.44	-0.56	-0.37	-0.39	-0.08	-0.14	-0.32	-0.59	-0.56	-0.37	0.05	-0.05	-0.62	-0.46	-0.27	-0.37	-0.09	-0.13	-0.0383333
YAL025C	MAK16	cell cycle*	molecular_function	0	-3.28	-2.37	-1.66	-1.43	-1.1	-1.66	-2.37	-1.65	0.025	-5.285	-3.595	-2.285	-2.585	-2.635	-2.785	-2.615	-2.765	0.295	-0.325	-0.475	-1.255	-1.215	-1.495	-1.295	-1.215	-1.575	-0.49	-0.6	-0.31	-0.3	-0.05	0.08	-0.69	-0.52	-0.39	-0.48	-0.12	-0.04	-0.41	-0.11	-0.05	-0.11	0.08	-0.34	0.03
YAL036C	RBG1	ribosome biogenesis and assembly	nucleotide binding*	0	-2.39	-1.64	-1	-1.23	-1.16	-1.78	-2.09	-1.98	-0.145	-5.355	-2.935	-1.795	-2.185	-2.345	-2.365	-2.285	-2.455	0.105	-0.395	-0.685	-1.605	-1.755	-2.045	-1.915	-2.005	-2.185	-0.4	-0.39	-0.15	-0.02	0	0.04	-0.6	-0.77	-1.06	-0.62	-0.49	-0.14	-1.59	-1.45	-1.16	-1.21	-0.59	-0.41	0.112531
YAL059W	ECM1	cell wall organization and biogenesis*	molecular_function	0	-2.61	-2.02	-1.16	-0.59	-0.44	-0.77	-1.07	-0.64	-0.195	-4.265	-2.155	-0.925	-0.945	-0.905	-0.985	-0.995	-1.175	0.28	-0.51	-0.59	-0.6	-0.36	-0.55	-0.61	-0.72	-1.02	-0.35	-0.18	-0.62	-0.64	-0.04	0.25	-1.68	-1.4	-0.07	0.02	0.02	-0.04	0.11	-0.1	0.04	0.13	0.16	0.35	0.08
YBL004W	UTP20	rRNA processing*	binding*	0	-2.91	-1.75	-1	-0.51	-0.34	-0.69	-0.99	-0.99	0.09	-4.34	-1.69	-0.75	-0.47	-0.51	-0.69	-0.74	-0.83	0.65	0.23	-0.14	-0.72	-0.07	-0.18	-5.55e-17	-0.16	0.07	-0.48	-0.46	-0.1	-0.24	-0.05	0.05	-0.65	-0.66	0.05	-0.25	0	0.06	0.445	0.405	0.405	0.645	0.535	0.765	0.06
YBL024W	NCL1	ribosome biogenesis and assembly*	transferase activity*	0	-1.54	-1.46	-1.28	-1.64	-1.56	-2.27	-2.5	-2.5	0.015	-2.965	-2.195	-2.015	-2.255	-2.305	-2.395	-2.365	-2.455	0.37	0.16	-0.13	-1.21	-1.45	-1.77	-1.78	-1.97	-1.88	-0.57	-0.43	-0.2	-0.1	0.03	0.26	-0.3	-0.45	-0.35	-0.35	-0.06	0.26	-0.07	0.09	-0.14	-0.13	0.2	0.31	-0.09
YBL028C	YBL028C	ribosome biogenesis and assembly	molecular_function	0	-3.43	-2.71	-1.91	-1.57	-1.57	-1.84	-1.82	-0.95	-0.37	-2.23	-1.95	-1.12	-1.05	-1.18	-1.09	-1	-0.8	0.39	-0.09	-0.41	-0.97	-1.35	-1.65	-1.86	-1.97	-1.95	-0.8	-0.18	-0.83	-0.88	-0.38	0.08	-1.25	-0.87	0.44	0.69	0.64	0.16	0.385	0.135	0.315	0.485	0.225	0.625	0.05
YBL068W	PRS4	ribosome biogenesis and assembly*	transferase activity*	0	-1.58	-1.16	-0.82	-1.5	-1.42	-2.1	-2.08	-2.15	-0.13	-3.76	-2.07	-1.68	-1.86	-2.01	-1.95	-1.95	-2.15	0.21	-0.08	-0.04	0.07	-1.1	-1.42	-1.46	-1.54	-1.7	-0.26	-0.1	-0.11	-0.03	0.07	0.25	-1.13	-0.89	-0.43	-0.27	-0.21	0.26	0.395	0.545	0.495	0.565	0.295	0.325	-0.297704
YBL076C	ILS1	translation*	nucleotide binding*	0	-1.7	-1.42	-1.07	-1.83	-1.47	-2.19	-2.57	-2.61	0.03	-2.33	-2.1	-1.35	-1.39	-1.32	-1.36	-1.35	-1.12	0.04	-0.06	-0.11	-1.05	-1.26	-1.41	-1.39	-1.39	-1.54	0.32	0.1	-0.03	-0.03	-0.12	0.1	-0.64	-0.44	-0.37	-0.18	-0.09	-0.05	-0.17	-0.23	-0.21	-0.45	-0.14	0.07	-0.0602852
YBR031W	RPL4A	translation	RNA binding*	0	-1.16	-1	-0.36	-0.72	-0.71	-1.22	-1.84	-2.65	-0.15	-2.61	-2.78	-1.51	-2.23	-2.53	-2.34	-2.08	-2.24	-0.115	-0.705	-0.055	-2.695	-2.585	-2.885	-2.475	-2.095	-2.395	-0.08	-0.62	-0.28	0.06	-0.18	-0.28	0.05	0.45	-0.74	-0.8	-0.75	-0.19	-0.41	-0.14	-0.44	-0.22	0.04	0.28	-0.386455
YBR031W	RPL4A	translation	RNA binding*	0	-1.16	-1	-0.36	-0.72	-0.71	-1.22	-1.84	-2.65	-0.15	-2.61	-2.78	-1.51	-2.23	-2.53	-2.34	-2.08	-2.24	-0.115	-0.705	-0.055	-2.695	-2.585	-2.885	-2.475	-2.095	-2.395	-0.08	-0.62	-0.28	0.06	-0.18	-0.28	0.05	0.45	-0.74	-0.8	-0.75	-0.19	-0.41	-0.14	-0.44	-0.22	0.04	0.28	-0.386455
YBR034C	HMT1	ribosome biogenesis and assembly*	transferase activity*	0	-2.01	-1.63	-1.35	-1.95	-1.87	-2.36	-2.52	-1.86	-0.135	-3.845	-2.785	-2.205	-2.465	-2.455	-2.385	-2.295	-2.175	0	-0.56	-0.72	-1.57	-1.8	-1.82	-1.66	-1.94	-1.79	-0.75	-0.78	-0.52	-0.33	-0.02	0.14	-1.23	-1.14	-1.04	-0.82	-0.56	-0.08	-0.41	-0.29	-0.25	-0.31	0.02	0.44	-0.291194
YBR061C	TRM7	translation*	transferase activity*	0	-1.73	-1.47	-1.16	-1.8	-1.69	-2.01	-1.96	-1.71	-0.02	-2.55	-1.91	-1.8	-2.27	-2.23	-2.28	-2.24	-2.38	0.18	-0.43	-0.59	-1.15	-1.75	-1.76	-1.74	-1.9	-1.84	-0.85	-0.53	-0.71	-0.66	-0.09	0.14	-1.43	-1.14	-0.61	-0.39	-0.05	0.15	-0.56	-0.32	-0.18	-0.14	0.31	0.3	-0.22
YBR079C	RPG1	translation*	translation initiation factor activity	0	-1.25	-1.27	-1.24	-1.5	-1.4	-1.97	-2.12	-1.94	0.05	-2.43	-2.05	-1.86	-1.82	-1.73	-1.78	-1.92	-2	0.37	0.15	-0.15	-1.26	-1.5	-1.81	-1.64	-1.78	-1.7	-0.87	-0.86	-0.3	-0.17	-0.14	-0.13	-0.27	-0.64	-1.07	-1.06	-0.57	-0.17	-1.195	-0.915	-0.965	-0.755	-0.555	-0.555	-0.302802
YBR141C	YBR141C	biological_process	molecular_function	0	-3.23	-2.58	-1.43	-1.07	-0.87	-1.29	-1.53	-1.14	-0.13	-3.66	-2.51	-1.08	-1.03	-1.2	-1.22	-1.21	-1.2	0.045	-0.665	-0.745	-1.275	-0.925	-0.915	-0.915	-0.715	-0.825	-0.45	-0.5	-0.54	-0.59	-0.27	0.09	-1.13	-1.08	-0.53	0	0.1	0.02	-0.36	-0.45	-0.19	-0.39	-0.04	0.06	0.0088278
YBR142W	MAK5	ribosome biogenesis and assembly*	nucleotide binding*	0	-3.11	-2.35	-1.73	-1.59	-1.24	-1.74	-1.59	-1.27	-0.115	-4.955	-2.855	-1.865	-1.945	-2.135	-2.255	-2.155	-2.035	0.39	-0.24	-0.51	-1.38	-1.5	-1.52	-1.44	-1.43	-1.32	-1.02	-0.91	-0.52	-0.37	-0.27	-0.09	-0.9	-0.99	-0.69	-0.48	-0.17	-0.17	-0.45	-0.51	-0.44	-0.65	-0.28	-0.06	0.04
YBR143C	SUP45	translation*	translation release factor activity, codon specific	0	-1.2	-1.16	-1.21	-1.6	-1.35	-1.82	-2.05	-1.98	0.04	-2.41	-2.08	-1.98	-2.59	-2.56	-2.48	-2.33	-2.39	0.12	-0.01	-0.23	-0.96	-1.3	-1.67	-1.58	-1.63	-1.63	-0.6	-0.32	-0.2	-0.25	-0.07	0.06	-0.83	-0.47	0.25	0.31	0.36	0.19	-0.535	-0.585	-0.485	-0.475	-0.355	-0.245	-0.492904
YBR154C	RPB5	transcription*	transferase activity*	0	-1.17	-1.19	-1.25	-1.61	-1.55	-2.04	-2.05	-2.01	-0.02	-3.04	-2.27	-2.07	-2.38	-2.55	-2.67	-2.61	-2.8	0.245	0.045	-0.105	-0.975	-1.515	-1.685	-1.655	-1.805	-1.885	-0.89	-0.43	-0.5	-0.46	-0.11	0.12	-1.36	-1.06	-0.19	0.21	0.26	0	-0.785	-0.825	-0.665	-0.725	-0.465	-0.405	-0.3
YBR155W	CNS1	protein folding	binding*	0	-2.71	-2.12	-1.4	-1.33	-1.22	-1.28	-1.32	-0.95	-0.005	-3.505	-2.075	-1.135	-0.765	-0.695	-0.825	-0.875	-0.855	0.365	-0.225	-0.425	-0.775	-0.485	-0.475	-0.425	-0.495	-0.555	-0.43	-0.29	-0.53	-0.8	-0.36	0.11	-1.28	-1.21	-0.64	-0.16	0	-0.29	-0.385	-0.585	-0.385	-0.625	-0.235	-0.255	0.134697
YBR172C	SMY2	cytoskeleton organization and biogenesis	molecular_function	0	-0.45	-0.2	-0.53	-0.67	-0.64	-0.97	-0.85	-1.11	0.055	-2.475	-1.905	-1.445	-1.625	-1.715	-1.625	-1.715	-1.835	0.095	-0.295	-0.555	-1.385	-1.185	-0.965	-0.845	-1.045	-0.865	-0.78	-0.84	-0.46	-0.18	-0.08	-0.24	-0.68	-0.85	-1.25	-0.84	-0.73	-0.56	-0.875	-0.575	-0.565	-0.515	-0.335	-0.375	-0.755465
YBR247C	ENP1	ribosome biogenesis and assembly*	snoRNA binding	0	-3.13	-2.17	-1.6	-1.44	-1.07	-1.36	-1.42	-1.25	0.065	-5.145	-2.715	-1.685	-1.605	-1.635	-1.745	-1.745	-1.665	0.35	-0.61	-0.71	-1.29	-1.09	-1.11	-1.09	-1.05	-1	-0.94	-1.03	-0.59	-0.44	-0.13	0.07	-0.76	-0.86	-0.95	-0.93	-0.53	-0.07	-0.795	-0.475	-0.455	-0.485	-0.115	0.015	0.12
YBR267W	REI1	ribosome biogenesis and assembly*	molecular_function*	0	-2.74	-1.79	-0.94	-0.54	-0.46	-1.05	-1.24	-0.95	0.015	-4.535	-2.325	-1.145	-0.765	-0.825	-0.955	-0.945	-1.225	0.325	-0.335	-0.405	-0.835	-0.635	-0.785	-0.985	-0.945	-1.095	-0.21	-0.44	-0.09	-0.18	-0.07	0.1	-0.07	-0.22	-0.83	-0.8	-0.53	-0.09	-0.08	-0.11	-0.3	-0.34	-0.2	0.07	0.08
YBR271W	YBR271W	ribosome biogenesis and assembly	S-adenosylmethionine-dependent methyltransferase activity	0	-2.67	-2.28	-1.74	-1.19	-0.85	-0.61	-0.43	-0.02	-0.03	-2.98	-2.17	-0.94	-0.85	-0.85	-0.95	-0.9	-0.72	0.105	-0.685	-0.895	-1.495	-0.745	-0.725	-0.385	-0.225	-0.315	-1.05	-0.94	-0.97	-0.82	-0.52	-0.21	-0.38	-0.43	-0.44	-0.2	-0.13	-0.14	-0.14	-0.27	-0.04	0.1	0.3	0.19	0.03
YCL036W	GFD2	biological_process	molecular_function	0	-2.8	-1.92	-1.09	-0.53	-0.81	-1.19	-1.8	-2.72	-0.23	-3.35	-2.18	-0.81	-0.57	-1.09	-1.46	-1.69	-2.02	0.005	-1.115	-1.145	0.255	-0.065	-0.565	-0.545	-0.635	-0.715	-1.25	-0.96	0.06	-0.24	-0.17	0.08	-0.91	-0.7	-1.56	-1.43	-0.87	-0.37	-1.66	-1.27	-1.12	-1.18	-0.71	-0.71	0.546931
YCL054W	SPB1	rRNA processing*	transferase activity*	0	-2.93	-1.84	-1.06	-0.81	-0.55	-1.18	-1.62	-0.78	0.08	-4.22	-2.54	-1.53	-1.46	-1.41	-1.42	-1.18	-1.2	0.455	0.015	-0.005	-0.755	-0.835	-0.695	-0.475	-0.275	-0.465	-0.26	-0.48	0.03	0.06	0.14	0.2	-0.18	0.01	-0.31	-0.08	0.11	0.08	0.02	0.1	0.11	-0.25	0.15	0.32	0.01
YCL059C	KRR1	ribosome biogenesis and assembly*	RNA binding*	0	-3.26	-2.13	-1.38	-0.98	-0.65	-0.95	-1.22	-0.89	-0.04	-4.09	-1.82	-1.08	-0.97	-0.64	-0.73	-0.76	-0.86	0.29	-0.14	-0.52	-0.99	-1.12	-1.1	-0.96	-1.18	-0.98	-0.55	-0.46	-0.53	-0.56	-0.16	0.22	-0.89	-0.88	-0.7	-0.1	0.31	0.15	-0.355	-0.275	-0.185	-0.245	0.125	-0.035	-0.05
YCR016W	YCR016W	ribosome biogenesis and assembly	molecular_function	0	-2.39	-1.66	-1.33	-1.99	-1.95	-2.63	-3.12	-2.54	0.115	-3.645	-1.795	-1.335	-1.955	-1.695	-1.545	-1.495	-1.635	0.44	-0.11	-0.34	-0.69	-1.65	-1.74	-1.57	-1.47	-1.68	-0.5	-0.5	-0.62	-0.74	-0.29	-0.02	-1.05	-0.48	0.34	0.55	0.63	0.13	-0.17	-0.18	0.19	-0.04	0.19	0.01	-0.33
YCR057C	PWP2	ribosome biogenesis and assembly*	snoRNA binding	0	-2.85	-2.14	-1.48	-1.43	-1.22	-1.83	-2.1	-1.81	-0.02	-5.1	-3.47	-2.12	-2.17	-2.23	-2.43	-2.37	-2.26	0.2	-0.4	-0.63	-1.8	-1.75	-1.91	-1.87	-1.8	-1.84	-1.01	-1.02	-0.46	-0.41	0.01	0.19	-0.77	-0.73	-0.91	-0.78	-0.45	0.31	-0.62	-0.54	-0.41	-0.32	0.08	0.33	0.07
YDL031W	DBP10	ribosome biogenesis and assembly*	nucleotide binding*	0	-2.28	-1.77	-1.12	-1.03	-0.91	-1.33	-1.49	-1.2	-0.045	-2.365	-1.485	-1.055	-0.975	-1.105	-1.165	-1.185	-1.045	0.395	-0.255	-0.395	-0.425	-0.255	-0.275	-0.105	-0.215	-0.205	-0.52	-0.57	-0.29	-0.34	-0.16	-0.14	-0.62	-0.4	-0.54	-0.43	-0.29	-0.25	-0.375	-0.395	-0.365	-0.615	-0.425	-0.505	0.15
YDL051W	LHP1	tRNA processing*	nucleotide binding*	0	-2.53	-1.99	-1.35	-1.52	-1.4	-1.84	-2.17	-2.01	-0.025	-4.155	-2.705	-2.095	-2.315	-2.135	-2.195	-2.045	-2.055	0.285	-0.145	-0.485	-1.235	-1.615	-1.775	-1.595	-1.525	-1.735	-0.58	-0.31	-0.46	-0.4	-0.11	0.12	-0.89	-0.93	-0.47	-0.53	-0.14	-0.2	-0.67	-0.64	-0.62	-0.7	-0.34	-0.44	-0.225823
YDL060W	TSR1	ribosome biogenesis and assembly*	ribonucleoprotein binding	0	-3.09	-2.07	-1.4	-1.28	-1.03	-1.66	-1.6	-1.8	-0.065	-5.285	-2.645	-1.375	-1.505	-1.595	-1.735	-1.815	-1.825	0.25	-0.41	-0.64	-1.3	-0.95	-1.05	-1.25	-1.1	-1.22	-0.64	-0.5	-0.2	-0.23	0.05	0.11	-0.3	-0.43	-0.7	-0.46	-0.1	0.18	-0.99	-0.8	-0.91	-0.94	-0.81	-0.73	0.13
YDL061C	RPS29B	translation	metal ion binding*	0	-1.7	-1.95	-1.38	-1.34	-1.46	-1.74	-2.24	-2.43	-0.095	-3.545	-3.095	-1.885	-1.745	-1.955	-2.005	-1.905	-1.915	0.205	0.155	-0.135	-3.045	-2.615	-2.335	-2.175	-2.205	-2.065	0.08	0.11	0.08	-0.03	0.21	0.15	-0.87	-0.41	0.79	0.73	0.44	0.27	-0.27	-0.23	-0.09	0.1	-0.06	0.52	-0.0490118
YDL063C	YDL063C	ribosome biogenesis and assembly	molecular_function	0	-5.05	-3.18	-1.86	-1.88	-1.68	-2.39	-2.8	-2.12	0.135	-5.855	-3.885	-1.885	-1.865	-2.175	-2.305	-2.225	-2.365	0.37	-0.67	-0.8	-1.65	-1.39	-1.78	-1.69	-1.83	-1.67	-1	-0.95	-0.8	-0.78	-0.27	-0.07	-1.74	-1.46	-0.67	-0.5	-0.12	0.01	-0.405	-0.395	-0.305	-0.145	-0.075	0.145	0.06
YDL112W	TRM3	tRNA processing*	transferase activity*	0	-2.26	-1.59	-0.9	-1.14	-0.9	-0.94	-0.75	-0.78	-0.01	-2.96	-1.45	-1.01	-0.95	-0.83	-0.82	-0.7	-0.39	0.455	0.045	-0.135	-0.815	-0.935	-0.755	-0.655	-0.465	-0.325	-0.3	-0.18	0	-0.11	0.08	0.18	-0.39	-0.23	0	0.16	0.03	0.24	0.065	0.065	0.115	0.095	0.185	0.345	0.2
YDL121C	YDL121C	biological_process	molecular_function	0	-1.92	-1.29	-0.52	-1.04	-1.48	-1.83	-2.17	-2.18	-0.535	-3.265	-2.175	-1.585	-1.725	-1.905	-1.975	-1.955	-1.885	-0.165	-0.595	-0.775	-1.265	-1.595	-1.575	-1.625	-1.335	-1.835	-0.08	0.32	-0.2	-0.42	-0.08	-0.18	-1.42	-0.64	0.24	-0.05	0.06	-0.37	0.405	0.305	0.565	0.775	0.585	0.885	0.22
YDL148C	NOP14	ribosome biogenesis and assembly*	snoRNA binding	0	-2.99	-2.31	-1.6	-1.11	-0.56	-0.89	-1.14	-0.85	-0.195	-5.085	-3.215	-2.245	-1.905	-1.625	-1.525	-1.355	-1.405	0.205	-0.435	-0.635	-1.385	-0.975	-0.945	-0.725	-1.015	-0.765	-1.13	-0.93	-0.75	-0.83	-0.47	-0.22	-0.98	-1.07	-0.79	-0.66	0.02	-0.04	-0.475	-0.205	-0.105	-0.105	0.115	0.095	0.07
YDL150W	RPC53	transcription*	transferase activity*	0	-1.44	-1.32	-1.2	-1.21	-1.06	-1.3	-1.56	-1.19	0.01	-2.95	-2.13	-1.57	-1.55	-1.63	-1.73	-1.68	-1.71	0.19	-0.23	-0.51	-1.38	-1.4	-1.66	-1.48	-1.13	-1.49	-0.97	-0.93	-0.59	-0.45	-0.13	-0.15	-0.05	-0.31	-1.11	-0.57	-0.17	0.01	-1.45	-1.26	-1.06	-1.22	-0.73	-0.77	-0.12
YDL153C	SAS10	cell cycle*	snoRNA binding	0	-3.08	-1.64	-0.91	0.03	0.55	0.54	0.43	0.78	0.14	-5.02	-2.51	-1.2	-1.02	-0.74	-0.71	-0.46	-0.4	0.445	-0.055	-0.285	-0.735	-0.435	-0.265	-0.055	0.175	-0.155	-0.08	-0.32	-0.16	-0.46	-0.14	0.07	-0.42	-0.11	0.18	0.2	0.32	0.05	-0.225	-0.275	-0.175	-0.445	-0.245	-0.265	0.18
YDL167C	NRP1	ribosome biogenesis and assembly	molecular_function*	0	-2.45	-1.66	-1.04	-0.95	-0.83	-1.33	-1.62	-1.25	0	-4.08	-2.26	-1.64	-1.36	-0.46	-0.36	-0.46	-0.16	0.185	-0.285	-0.395	-1.085	-1.185	-1.025	-0.985	-0.915	-1.095	-0.74	-0.42	-0.33	-0.22	-0.03	0.07	-0.88	-0.31	-0.32	-0.28	-0.11	-0.01	-0.765	-0.435	-0.255	-0.175	-0.065	0.175	0.16
YDL201W	TRM8	ribosome biogenesis and assembly*	transferase activity*	0	-1.81	-1.27	-0.94	-0.24	-0.06	-0.2	-0.48	-0.31	0.11	-3.96	-2.29	-1.32	-1.22	-1.03	-0.93	-0.95	-1.07	0.33	-0.03	-0.31	-1.03	-0.31	-0.41	-0.25	-0.22	-0.3	-0.24	-0.47	-0.29	-0.21	0.06	0.2	-0.74	-0.63	-0.3	-0.15	0.04	0.21	-0.65	-0.52	-0.45	-0.66	-0.41	-0.27	-0.15
YDL208W	NHP2	ribosome biogenesis and assembly*	RNA binding*	0	-2.26	-1.81	-1.26	-1.35	-1.08	-1.58	-1.88	-1.48	-0.125	-4.215	-2.465	-1.855	-2.255	-2.645	-2.735	-2.645	-2.875	0.24	-0.08	-0.26	-0.96	-1.39	-1.39	-1.51	-1.85	-2	-1.08	-0.6	-0.68	-0.62	-0.33	-0.13	-1.44	-1.39	-0.69	-0.22	-0.01	-0.37	-0.325	-0.265	-0.005	-0.035	0.205	0.165	-0.335533
YDL213C	NOP6	rRNA processing*	RNA binding*	0	-2.35	-1.69	-1.19	-1.49	-1.5	-1.71	-1.97	-1.43	0.015	-2.805	-1.885	-1.255	-1.505	-1.375	-1.225	-1.075	-0.885	0.37	-0.23	-0.6	-0.96	-1.18	-1.42	-1.24	-1.49	-1.48	-0.55	-0.36	-0.52	-0.59	-0.34	0.03	-1.03	-0.98	-1.03	-0.35	-0.07	-0.26	-0.9	-0.97	-0.62	-1.08	-0.66	-0.93	-0.177933
YDR019C	GCV1	one-carbon compound metabolic process*	transferase activity*	0	-2.13	-1.59	-1.43	-1.31	-1.38	-1.02	-1.27	-1.41	0.13	-1.27	-1.1	-1.37	-2.78	-2.88	-2.89	-3.02	-3.23	0.23	0.1	-0.76	-0.9	-1.46	-1.61	-1.66	-1.82	-1.73	0.08	0.06	-0.13	-0.11	-0.11	0.12	-0.97	-0.78	-0.74	-0.27	-0.33	-0.17	-1.145	-1.235	-0.865	-1.175	-0.425	-0.595	0.229495
YDR021W	FAL1	rRNA processing	nucleotide binding*	0	-3.99	-2.36	-1.23	-1.26	-1.38	-2.51	-2.75	-2.62	0.045	-3.405	-2.185	-0.915	-0.765	-0.755	-0.845	-0.725	-0.775	0.35	-0.48	-0.48	-0.99	-1.13	-1.37	-1.32	-1.39	-1.59	-0.72	-0.69	-0.57	-0.77	-0.21	0.09	-1.15	-0.89	-0.02	0.23	0.19	0.09	-0.565	-0.685	-0.555	-0.645	-0.485	-0.365	0.14
YDR083W	RRP8	telomere maintenance*	methyltransferase activity	0	-3.58	-2.52	-1.77	-1.48	-1.2	-1.38	-1.7	-0.85	-0.085	-5.365	-3.355	-1.945	-1.825	-1.665	-1.595	-1.555	-1.385	0.27	-0.58	-0.96	-1.51	-1.14	-1.12	-0.87	-1.13	-0.9	-1.11	-0.85	-0.84	-0.84	-0.35	-0.05	-2.01	-1.79	-1.1	-0.29	-0.2	-0.26	-1.03	-1.03	-0.69	-0.67	-0.34	-0.31	-0.03
YDR087C	RRP1	ribosome biogenesis and assembly*	molecular_function	0	-3.76	-2.62	-1.44	-1.92	-1.72	-2.7	-3.25	-2.78	-0.09	-5.1	-2.89	-1.93	-2.04	-2.04	-2.11	-2.07	-2.1	0.355	-0.325	-0.395	-1.075	-1.725	-1.615	-1.765	-1.965	-2.355	-0.7	-0.59	-0.39	-0.55	-0.34	-0.1	-1.27	-1.14	-0.46	-0.09	-0.1	-0.22	-0.84	-0.61	-0.53	-0.61	-0.37	-0.4	-0.1
YDR091C	RLI1	transport*	nucleotide binding*	0	-1.85	-1.38	-1.22	-1.31	-1.19	-1.85	-2.04	-2.24	0.165	-3.565	-1.955	-1.625	-1.905	-2.045	-2.075	-2.155	-2.345	0.335	-0.105	-0.265	-1.415	-1.635	-1.685	-1.565	-1.775	-1.705	-1.06	-0.88	-0.58	-0.18	0.08	0.26	-0.43	-0.16	-0.5	-0.17	-0.25	0.4	0.13	0.36	0.42	0.4	0.76	1.31	-0.151229
YDR120C	TRM1	ribosome biogenesis and assembly*	transferase activity*	0	-3.64	-2.32	-1.24	-1.52	-1.27	-1.46	-1.38	-1.52	0	-5.26	-2.51	-1.38	-1.53	-1.64	-1.71	-1.71	-1.5	0.17	-0.48	-0.88	-1.56	-1.41	-1.65	-1.53	-1.35	-1.7	-0.66	-0.52	-0.36	-0.33	-0.18	-0.1	-0.51	-0.4	-0.84	-0.41	-0.2	-0.02	-0.525	-0.345	-0.185	-0.395	0.175	-0.215	-0.05
YDR161W	YDR161W	ribosome biogenesis and assembly	molecular_function*	0	-2.99	-1.79	-1.24	-1.13	-0.89	-1.02	-1.24	-1.19	-0.04	-4.02	-1.76	-1.27	-1.2	-1.22	-1.14	-1.22	-1.4	0.225	-0.405	-0.655	-1.045	-1.215	-1.245	-0.995	-0.905	-0.915	-0.6	-0.43	-0.55	-0.71	-0.34	-0.03	-0.9	-0.71	-0.34	-0.46	-0.19	-0.24	-0.7	-0.45	-0.4	-0.64	-0.32	-0.41	-0.12
YDR184C	ATC1	telomere maintenance*	molecular_function	0	-3.52	-2.44	-1.71	-1.17	-1.24	-1.26	-1.16	-1.18	0.035	-4.345	-3.845	-2.115	-1.365	-1.435	-1.605	-1.695	-1.565	0.21	-0.6	-0.91	-2.45	-1.87	-1.76	-1.79	-1.51	-2.11	-0.88	-0.97	-0.79	-0.71	-0.1	0.11	-1.7	-1.47	-0.54	-0.32	-0.14	0.15	-0.865	-0.795	-0.315	-0.255	-0.075	0.155	-0.239656
YDR299W	BFR2	transport*	molecular_function	0	-3.69	-2.32	-1.55	-1.48	-1.18	-1.47	-1.75	-1.42	0.01	-5.66	-3.59	-2.11	-2.15	-1.85	-2.04	-1.94	-1.99	0.22	-0.47	-0.74	-1.41	-1.25	-1.42	-1.06	-0.93	-1.07	-0.9	-0.98	-0.57	-0.54	-0.35	-0.27	-0.68	-0.48	-0.33	-0.22	0.05	-0.11	-0.39	-0.21	-0.21	-0.29	-0.2	-0.19	0.08
YDR361C	BCP1	transport*	molecular_function	0	-3.05	-2.09	-1.4	-1.54	-1.5	-1.54	-1.29	-0.99	-0.02	-2.49	-1.47	-0.9	-1.21	-1.36	-1.46	-1.4	-1.48	0.275	-0.365	-0.485	-0.905	-1.035	-1.155	-1.075	-0.985	-1.415	-0.4	-0.33	-0.35	-0.42	-0.09	0.09	-1.33	-1.1	-0.33	-0.19	-0.1	-0.1	-0.405	-0.555	-0.475	-0.655	-0.305	-0.235	-0.04
YDR395W	SXM1	transport*	binding*	0	-1.62	-1.54	-1.25	-1.44	-1.31	-1.67	-1.75	-1.71	0.06	-2.4	-2	-1.55	-1.64	-1.57	-1.66	-1.71	-1.54	0.24	0.15	-0.04	-0.96	-1.16	-1.29	-1.23	-1.33	-1.1	-0.56	-0.45	-0.35	-0.33	-0.03	0	-0.68	-0.49	-0.33	0	0.15	0.36	-0.87	-0.72	-0.62	-0.55	-0.48	-0.2	-0.198387
YDR398W	UTP5	ribosome biogenesis and assembly*	snoRNA binding	0	-3.25	-2.06	-1.52	-1.75	-1.5	-2.12	-2.49	-1.96	0.02	-4.03	-2.36	-1.65	-1.73	-1.81	-1.9	-1.95	-1.99	0.15	-0.48	-0.55	-1.39	-1.65	-1.84	-1.82	-1.85	-1.87	-1.07	-0.76	-0.2	-0.19	-0.06	0	-0.72	-0.66	-1.05	-0.83	-0.38	0.06	-1.255	-1.015	-1.025	-0.775	-0.485	-0.455	-0.11
YDR412W	YDR412W	ribosome biogenesis and assembly*	molecular_function	0	-2.1	-1.61	-1.24	-1.92	-1.72	-1.76	-1.79	-1.2	0.055	-3.145	-2.005	-1.625	-1.695	-1.425	-1.255	-1.155	-1.075	0.38	-0.13	-0.35	-1.16	-1.26	-1.18	-1.24	-1.19	-1.47	-0.6	-0.49	-0.45	-0.57	-0.18	-0.01	-1.23	-0.71	0.06	0.11	0.3	0.14	-0.68	-0.44	-0.24	-0.18	0.04	-0.18	-0.38
YDR449C	UTP6	ribosome biogenesis and assembly*	snoRNA binding	0	-3.19	-2.47	-1.7	-1.62	-1.24	-1.45	-1.56	-1.23	0.1	-5.04	-3.05	-1.77	-1.79	-1.88	-1.88	-1.83	-1.76	0.29	-0.46	-0.73	-1.9	-1.77	-1.77	-1.5	-1.3	-1.47	-0.93	-1.06	-0.77	-0.74	-0.25	-0.17	-1.61	-1.02	-0.19	-0.09	0.22	0.01	-0.495	-0.385	0.015	0.155	0.355	0.465	0.03
YDR465C	RMT2	ribosome biogenesis and assembly*	transferase activity*	0	-4.29	-2.62	-1.44	-1.19	-0.62	-1.5	-1.88	-1.46	0.06	-4.76	-3.09	-1.67	-1.76	-1.26	-1.31	-1.29	-1.38	0.235	-0.275	-0.895	-1.585	-1.625	-2.025	-1.965	-1.715	-1.785	-0.1	-0.06	-0.01	-0.04	0.05	0.19	-0.79	-0.52	-0.31	-0.27	0.04	0.1	-1.03	-0.83	-0.73	-0.74	-0.44	-0.48	0.143145
YDR496C	PUF6	ribosome biogenesis and assembly*	RNA binding*	0	-3.22	-1.94	-1.28	-1.43	-1.29	-1.85	-2.08	-1.88	0.16	-6.07	-3.12	-1.97	-2.11	-2.29	-2.38	-2.36	-2.5	0.39	-0.3	-0.48	-1.24	-1.29	-1.49	-1.54	-1.59	-1.67	-1.16	-1.11	-0.69	-0.92	-0.43	-0.18	-1.47	-1.32	-0.79	-0.16	-0.19	-0.19	-0.515	-0.405	-0.295	-0.475	-0.145	-0.235	0.05
YDR500C	RPL37B	translation	metal ion binding*	0	-1.96	-2.18	-1.67	-1.83	-1.65	-1.77	-1.96	-1.71	0	-3.55	-2.8	-1.7	-1.28	-1.25	-1.35	-1.3	-1.16	0.32	0.34	-0.11	-3.1	-2.7	-2.36	-2.28	-2.24	-2.02	-0.09	0.17	-0.08	-0.16	0.13	0.17	-1.11	-0.28	0.59	0.57	0.52	0.27	-0.47	-0.48	-0.14	0.16	-0.01	0.51	-0.397908
YDR527W	RBA50	transcription*	molecular_function	0	-2.44	-2.15	-1.52	-0.78	-0.68	-1.01	-1.12	-0.51	-0.08	-2.33	-1.67	-0.78	-0.26	-0.23	-0.26	-0.3	0.02	0.16	-0.14	-0.55	-0.99	-0.73	-0.63	-0.58	-0.63	-0.61	-0.43	-0.64	-0.79	-0.85	-0.59	-0.22	-0.67	-0.96	-1.06	-1.01	-0.57	-0.57	-0.245	-0.235	-0.345	-0.535	-0.385	-0.395	-0.00521195
YEL055C	POL5	transcription*	nucleotide binding*	0	-2.07	-1.55	-1.35	-2.07	-1.75	-2.52	-2.64	-2.93	0.025	-2.745	-1.845	-1.815	-1.815	-1.625	-1.605	-1.545	-1.675	0.235	-0.055	-0.235	-1.305	-1.775	-1.505	-1.355	-1.485	-1.415	-0.6	-0.57	-0.5	-0.48	-0.16	0.06	-0.18	-0.33	-0.21	-0.14	-0.04	0.09	-0.05	0.05	0.03	0.13	0.18	0.25	-0.0835954
YER006W	NUG1	transport*	nucleotide binding*	0	-3.62	-2.32	-1.33	-1.11	-0.74	-1.27	-1.48	-1.36	-0.045	-4.185	-3.195	-1.835	-2.015	-1.795	-1.655	-1.665	-1.775	0.2	-0.48	-0.72	-1.23	-1.27	-1.25	-1.13	-0.88	-1.1	-0.13	-0.39	-0.11	-0.17	0.02	0.11	-0.25	-0.29	-0.46	-0.2	-0.06	0.16	-0.53	-0.4	-0.54	-0.85	-0.33	-0.09	0.07
YER049W	TPA1	ribosome biogenesis and assembly*	molecular_function*	0	-2.87	-2.01	-1.48	-2.27	-2.23	-2.9	-3.27	-2.53	0.085	-2.155	-1.725	-1.465	-2.125	-2.065	-2.085	-2.135	-2.165	0.29	-0.05	-0.34	-0.49	-1	-1.5	-1.5	-1.55	-1.6	-0.41	-0.25	-0.11	-0.14	-0.1	0.19	-0.7	-0.58	-0.07	0.12	0.24	0.35	-0.985	-0.895	-0.735	-0.835	-0.535	-0.545	-0.18
YER082C	UTP7	ribosome biogenesis and assembly*	molecular_function	0	-2.23	-1.37	-0.81	-0.61	-0.41	-0.59	-0.62	-0.45	0.135	-3.905	-2.175	-1.225	-0.835	-0.795	-0.845	-0.805	-0.855	0.425	-0.295	-0.445	-0.995	-0.215	-0.015	-0.065	-0.085	-0.255	-0.61	-0.61	-0.24	-0.48	-0.14	-0.08	-0.93	-1.09	-1.03	-0.72	-0.26	-0.24	-0.44	-0.48	-0.33	-0.57	-0.4	-0.15	-0.0131772
YER086W	ILV1	metabolic process*	catalytic activity*	0	-2.39	-1.84	-1.1	-1.89	-1.61	-2.39	-2.46	-2.79	-0.06	-2.05	-1.68	-1.4	-1.41	-1.23	-1.2	-1.29	-1.09	-0.005	-0.215	-0.435	-1.115	-1.125	-1.135	-1.285	-1.675	-1.655	-0.1	-0.5	-0.4	-0.27	-0.24	-0.16	-0.98	-0.66	-1.44	-1.06	-0.61	-0.01	-1.535	-1.655	-1.605	-1.665	-0.785	-0.225	-0.15318
YER110C	KAP123	transport*	binding*	0	-4.21	-2.43	-1.42	-2.13	-2	-2.48	-2.8	-3.2	0.105	-3.535	-2.055	-1.685	-1.845	-2.005	-2.155	-2.235	-2.435	0.56	0.34	-0.15	-0.82	-1.09	-1.28	-1.23	-1.21	-1.24	-1.19	-1.48	-1.01	-0.42	-0.05	0.17	-0.55	-0.61	-0.97	-0.89	-0.57	0.25	0.085	0.285	0.345	0.375	0.775	1.085	0.111772
YER126C	NSA2	ribosome biogenesis and assembly*	molecular_function	0	-3.25	-2.24	-1.32	-1.16	-0.89	-1.54	-1.91	-1.79	-0.125	-5.655	-2.935	-1.355	-1.985	-2.215	-2.425	-2.305	-2.815	-0.04	-0.51	-0.7	-0.81	-0.81	-1.05	-0.89	-0.97	-1.12	-0.18	-0.12	-0.28	-0.48	-0.22	-0.1	-0.76	-0.31	0.42	0.37	0.21	-0.03	-0.34	-0.3	-0.34	-0.44	-0.34	-0.49	0.08
YER127W	LCP5	ribosome biogenesis and assembly*	RNA binding	0	-3.16	-2.3	-1.52	-2	-2.09	-2.39	-2.55	-1.91	-0.08	-4.61	-2.32	-1.57	-1.75	-1.8	-1.69	-1.52	-1.48	0.2	-0.49	-0.5	-0.86	-1.12	-1.35	-1.2	-1.11	-1.27	-0.44	-0.36	-0.3	-0.28	-0.14	0.28	-0.84	-0.39	-0.41	-0.38	-0.22	-0.01	-0.02	0.06	0.1	0.02	0.25	0.16	-0.055388
YFL022C	FRS2	translation*	nucleotide binding*	0	-1.52	-1.44	-1.51	-1.53	-1.36	-1.86	-2.16	-2.18	0.03	-2.47	-1.94	-1.95	-1.62	-1.73	-1.85	-1.89	-2.24	0.38	0.12	0.12	-0.76	-0.86	-0.87	-0.99	-1.21	-1.36	-0.86	-1.06	-0.46	-0.16	0.1	0.21	-0.67	-0.62	-1.42	-0.96	-0.42	0.28	-0.575	-0.455	-0.425	-0.325	0.175	0.345	-0.51671
YFR001W	LOC1	ribosomal large subunit biogenesis and assembly*	mRNA binding	0	-1.79	-1.27	-0.09	-0.46	-0.68	-0.8	-1.26	0.01	-0.095	-2.735	-1.365	-1.015	-1.435	-1.525	-1.425	-1.355	-1.565	0.365	0.195	-0.125	-0.355	-0.595	-0.705	-0.565	-0.705	-0.915	0.26	0.74	0.1	-0.38	-0.25	0.11	-0.43	-0.44	0.34	0.29	0.27	-0.3	1.065	0.945	0.955	0.955	0.955	0.795	0.11
YGL029W	CGR1	ribosome biogenesis and assembly*	molecular_function	0	-3.14	-2.69	-1.5	-1.04	-1.11	-0.95	-1.19	-0.28	-0.175	-4.495	-2.345	-0.775	-0.985	-1.305	-1.395	-1.205	-1.845	0.48	0.02	-0.21	-0.56	-0.45	-0.52	-0.44	-0.43	-0.72	-0.6	-0.63	-0.71	-0.85	-0.53	-0.2	-0.5	-0.19	0.08	0.41	0.19	-0.14	0.53	0.32	0.44	0.22	0.22	0.53	0.26
YGL030W	RPL30	translation*	structural constituent of ribosome	0	-1.28	-1.31	-0.5	-0.37	-0.32	-0.41	-1.5	-1.3	-0.34	-3.28	-3.01	-1.1	-1.25	-1.57	-1.55	-1.58	-1.51	-0.155	-0.165	-0.215	-3.435	-2.815	-2.685	-2.515	-2.565	-2.155	0.3	0.34	0.24	0.09	0.27	0.4	-0.16	0.01	0.46	0.33	0.2	0.52	-0.85	-0.65	-0.56	-0.37	-0.36	-0.35	-0.42
YGL078C	DBP3	rRNA processing*	nucleotide binding*	0	-3.26	-2.28	-1.63	-1.14	-0.76	-1.26	-1.46	-1.14	-0.015	-5.955	-3.875	-2.625	-2.685	-2.445	-2.445	-2.315	-2.235	0.245	-0.515	-0.745	-1.835	-1.725	-1.845	-1.755	-1.865	-1.745	-1.14	-1.03	-0.56	-0.49	-0.28	-0.25	-1.12	-0.91	-0.91	-0.59	-0.28	-0.12	-0.495	-0.365	-0.405	-0.365	-0.175	-0.155	0.04
YGL099W	LSG1	ribosome biogenesis and assembly*	nucleotide binding*	0	-2.01	-1.51	-1	-0.85	-0.71	-1.16	-1.33	-1.13	0.065	-3.585	-1.985	-1.185	-1.075	-0.935	-0.905	-0.835	-1.115	0.36	-0.11	-0.33	-0.88	-0.76	-0.89	-0.78	-0.98	-0.95	-0.62	-0.65	-0.11	-0.12	-0.04	0.12	-0.29	-0.31	-0.59	-0.63	-0.19	0.14	-0.615	-0.355	-0.395	-0.495	-0.135	-0.285	-0.11
YGL111W	NSA1	ribosome biogenesis and assembly*	molecular_function	0	-1.9	-1.34	-0.85	-0.91	-0.61	-1.01	-1.14	-0.95	0.045	-3.885	-1.795	-1.285	-1.445	-1.155	-0.935	-0.875	-0.785	0.31	-0.22	-0.41	-0.9	-1.01	-1.1	-0.94	-0.81	-0.94	-0.24	-0.2	-0.26	-0.44	-0.04	0.37	-0.25	-0.29	-0.41	-0.42	-0.09	0.14	-0.15	0.2	0.23	0.09	0.47	0.08	-0.09
YGL123W	RPS2	translation*	RNA binding*	0	-0.36	-0.71	-0.14	-0.33	-0.25	-0.39	-0.98	-2.02	-0.07	-2.39	-2.68	-1	-1.42	-1.83	-1.93	-1.68	-1.8	-0.09	-1.1	-0.44	-3.29	-2.44	-2.64	-2.29	-1.88	-2.1	0.17	-0.09	0.05	0.02	0.17	0.4	0.07	0.27	-0.39	-0.31	-0.25	0.18	-0.05	0.22	0.1	-0.1	0.41	0.32	-0.338717
YGL169W	SUA5	aerobic respiration	molecular_function	0	-1.96	-1.52	-1.14	-1.16	-0.87	-1.05	-0.82	-0.86	-0.325	-1.325	-1.815	-1.365	-1.125	-0.985	-1.035	-1.005	-0.855	-0.105	-0.755	-1.065	-1.595	-0.985	-0.825	-0.775	-0.625	-0.935	-0.79	-0.93	-0.6	-0.29	-0.11	0.02	-1.22	-1.12	-1.19	-0.81	-0.48	0.06	-0.57	-0.36	-0.3	-0.07	0.42	0.72	-0.34
YGL171W	ROK1	rRNA processing	nucleotide binding*	0	-3.42	-1.81	-1.1	-1.32	-1.08	-1.68	-1.88	-1.67	-0.075	-4.675	-3.045	-1.885	-1.825	-1.755	-1.645	-1.775	-1.705	0.155	-0.405	-0.685	-1.475	-1.275	-1.395	-1.385	-1.385	-1.355	-0.65	-0.55	-0.61	-0.51	-0.17	0.08	-0.55	-0.47	-0.36	-0.24	-0.01	-0.12	-0.66	-0.44	-0.5	-0.54	-0.27	-0.24	-0.15
YGL234W	ADE5,7	purine nucleotide biosynthetic process*	nucleotide binding*	0	-3.22	-2.26	-1.59	-2.22	-1.94	-2.22	-2.21	-1.98	0.32	-2.73	-2.52	-2.15	-2.43	-2.32	-2.41	-2.47	-2.82	0.215	-0.065	-0.715	-1.465	-1.585	-1.875	-1.775	-1.675	-1.865	-0.78	-1.03	-0.84	-0.61	-0.43	-0.19	-0.31	0	-1.09	-1.02	-0.97	-0.47	-1.785	-1.625	-1.565	-1.485	-1.015	-0.755	-0.471228
YGR027C	RPS25A	translation	structural constituent of ribosome	0	-1.28	-1.59	-1.07	-0.93	-1.2	-1.59	-2.04	-2.49	0.09	-2.86	-2.6	-1.5	-1.18	-1.44	-1.57	-1.53	-1.64	0.305	0.275	0.185	-2.665	-2.495	-2.385	-2.225	-2.265	-1.965	0.18	0.39	0.14	-0.05	0.13	0.1	-0.69	-0.95	0.12	0.14	0.12	-0.05	0.17	0.19	0.3	0.49	0.29	0.44	-0.21
YGR061C	ADE6	glutamine metabolic process*	nucleotide binding*	0	-2.04	-1.57	-1.26	-1.27	-1.21	-1.36	-1.52	-1.94	0.175	-1.865	-1.585	-1.395	-1.765	-1.565	-1.705	-1.705	-2.095	0.53	0.59	0.09	-0.66	-0.91	-1.18	-1.11	-1.25	-1.24	-0.42	-0.11	-0.21	-0.09	0.1	0.57	-0.16	-0.26	-0.48	-0.45	-0.22	0.41	-0.28	-0.05	-0.15	0.06	0.43	0.44	-0.247271
YGR081C	SLX9	rRNA processing	snoRNA binding	0	-1.6	-1.68	-1.12	-0.68	-0.47	-0.32	-0.21	-0.06	-0.04	-2.65	-1.79	-0.88	-1	-0.99	-1.07	-1.09	-1.03	0.29	-0.23	-0.57	-1.7	-1.58	-1.44	-1.33	-1.46	-1.59	-0.52	-0.22	-0.73	-1.06	-0.41	-0.07	-1.62	-1.08	0.09	0.53	0.37	-0.07	-1.025	-1.115	-0.735	-0.785	-0.645	-0.645	0.06
YGR090W	UTP22	rRNA processing	RNA binding*	0	-1.16	-1.43	-1.04	-0.57	-0.53	-0.79	-1.03	-1.03	0.15	-3.28	-2.27	-0.81	-0.72	-1.1	-1.26	-1.3	-1.42	0.395	0.245	-0.145	-2.045	-1.145	-1.205	-1.095	-0.995	-0.955	-0.27	-0.38	0.17	0.01	0.1	0.15	-0.15	-0.04	0.44	0.15	0.25	0.33	-0.12	0.03	0.1	0.17	0.36	0.35	0.113364
YGR103W	NOP7	cell cycle*	molecular_function	0	-4.1	-2.8	-1.6	-1.36	-0.76	-1.22	-1.63	-0.83	-0.125	-5.325	-3.425	-1.945	-1.915	-1.815	-1.755	-1.765	-1.695	0.3	-0.13	-0.55	-1.09	-1.06	-1.16	-0.9	-0.9	-0.92	-0.62	-0.55	0.01	-0.18	0.05	0.21	-0.68	-0.67	-0.45	-0.42	0.16	-0.05	0.245	0.305	0.305	0.125	0.605	0.445	0.06
YGR118W	RPS23A	translation*	structural constituent of ribosome	0	-1.06	-1.36	-0.85	-1.01	-1.21	-1.51	-2.44	-2.62	-0.285	-3.515	-3.055	-1.655	-1.445	-1.965	-1.995	-2.015	-2.135	-0.08	-0.06	0.03	-3.05	-2.26	-2.26	-2.06	-2.14	-2.1	0	0.29	0.21	-0.12	0.07	0.03	-1.31	-1.12	0.39	0.49	0.45	0.01	0.175	0.115	0.475	0.495	0.505	0.345	-0.29
YGR145W	ENP2	ribosome biogenesis and assembly*	molecular_function	0	-4.56	-2.5	-1.42	-1.45	-1.06	-1.75	-1.87	-1.29	0.03	-5.3	-2.62	-1.3	-1.36	-1.54	-1.5	-1.45	-1.34	0.385	-0.435	-0.655	-0.955	-0.735	-0.915	-0.795	-0.715	-0.855	-0.73	-0.79	-0.71	-0.56	-0.15	0.01	-0.92	-0.79	-0.57	-0.14	0	0	0.345	0.335	0.395	0.355	0.625	0.535	0.060237
YGR158C	MTR3	rRNA processing*	hydrolase activity*	0	-1.87	-1.18	-0.74	-1.08	-1.15	-1.46	-1.45	-1.96	-0.015	-1.875	-1.375	-1.365	-1.805	-1.895	-1.925	-1.825	-1.875	0.08	-0.33	-0.37	-1.2	-1.54	-1.85	-1.89	-1.86	-2.02	-0.69	-0.65	-0.65	-0.54	-0.29	-0.12	-1.25	-0.82	-0.2	-0.04	0.04	-0.13	-0.74	-0.44	-0.1	-0.19	0.08	-0.23	-0.28
YGR162W	TIF4631	translation*	RNA binding*	0	-2.03	-1.79	-1.67	-1.47	-1.23	-1.73	-1.92	-2.06	-0.06	-4.11	-2.34	-1.68	-1.72	-1.65	-1.75	-1.7	-1.82	0.3	0.11	-0.18	-1.49	-1.35	-1.23	-0.99	-1.03	-0.99	-0.64	-0.75	-0.17	-0.01	0.02	0.07	0.47	0.23	-0.2	-0.55	-0.17	0.16	-0.56	-0.22	-0.27	-0.19	0.03	0.03	-0.14
YGR173W	RBG2	biological_process	nucleotide binding*	0	-1.59	-1.05	-0.74	-0.91	-0.79	-1.2	-1.56	-1.52	-0.02	-4.07	-2.03	-1.38	-1.65	-1.66	-1.71	-1.69	-1.9	0.12	-0.24	-0.41	-1.13	-1.13	-1.18	-1.05	-1.25	-1.47	-0.65	-0.56	-0.32	-0.41	0.03	0.22	-0.97	-0.99	-0.78	-0.53	-0.04	0.03	-1.215	-0.975	-0.715	-0.735	-0.285	-0.205	0.0883374
YGR187C	HGH1	ribosome biogenesis and assembly	molecular_function	0	-2.08	-1.88	-1.43	-1.97	-2.02	-2.57	-3.17	-2.96	0.015	-3.455	-2.315	-1.705	-2.325	-2.375	-2.535	-2.445	-2.665	0.11	-0.23	-0.54	-1.03	-1.27	-1.84	-1.72	-1.83	-1.88	-0.41	-0.33	-0.23	-0.21	-0.11	0.03	-0.86	-0.79	-0.14	-0.29	0.12	0.15	-0.365	-0.265	-0.195	-0.225	0.045	-0.065	0.01
YGR200C	ELP2	transport*	molecular_function	0	-2.07	-1.47	-1.16	-1.25	-1	-1.68	-1.94	-1.97	-0.03	-4.26	-2.43	-1.75	-2	-2.07	-2.15	-2.06	-2.21	0.345	-0.125	-0.275	-1.015	-1.205	-1.495	-1.425	-1.265	-1.575	-0.53	-0.67	-0.32	-0.14	0.01	-0.01	-0.42	-0.48	-0.32	-0.43	-0.1	0	0.24	0.55	0.64	0.74	0.85	0.8	-0.19
YGR211W	ZPR1	regulation of progression through cell cycle*	metal ion binding*	0	-1.81	-1.71	-1.42	-0.42	-0.74	-1.04	-1.36	-1.72	-0.05	-3.59	-1.76	-0.47	0.09	-0.21	-0.66	-0.94	-1.35	0.165	-0.055	-0.465	-0.825	0.235	-0.185	-0.365	-0.375	-0.885	0	-0.66	-0.56	-0.32	-0.22	0	0.64	-0.27	-1.08	-0.99	-0.62	0.05	-0.51	-0.69	-0.96	-1.17	-0.72	-0.65	0.960725
YGR214W	RPS0A	translation*	DNA binding*	0	-1.66	-1.58	-0.9	-0.96	-1.21	-1.55	-2.15	-2.96	0.1	-3.75	-3.23	-1.11	-1.1	-1.42	-1.45	-1.36	-1.68	0.055	0.115	0.025	-3.505	-2.705	-2.745	-2.385	-2.335	-2.355	-0.08	-0.21	0.04	0.1	0.05	0.13	-0.54	-0.39	-0.54	-0.39	-0.25	0.17	-0.455	-0.315	-0.395	-0.265	0.065	0.025	-0.183303
YGR214W	RPS0A	translation*	DNA binding*	0	-1.66	-1.58	-0.9	-0.96	-1.21	-1.55	-2.15	-2.96	0.1	-3.75	-3.23	-1.11	-1.1	-1.42	-1.45	-1.36	-1.68	0.055	0.115	0.025	-3.505	-2.705	-2.745	-2.385	-2.335	-2.355	-0.08	-0.21	0.04	0.1	0.05	0.13	-0.54	-0.39	-0.54	-0.39	-0.25	0.17	-0.455	-0.315	-0.395	-0.265	0.065	0.025	-0.183303
YGR245C	SDA1	transport*	molecular_function	0	-4.56	-2.85	-1.71	-1.79	-1.34	-1.84	-2.09	-1.32	0.065	-4.945	-2.395	-1.255	-1.265	-1.145	-0.995	-0.845	-0.765	0.425	-0.255	-0.455	-1.185	-0.845	-0.245	0.185	0.305	0.175	-0.79	-0.84	-0.31	-0.36	0.1	0.23	0.11	-0.22	-0.5	-0.34	0.09	0.43	-0.085	0.035	0.155	-0.015	0.225	0.205	0.13
YGR283C	YGR283C	ribosome biogenesis and assembly	molecular_function	0	-2.53	-2.37	-1.4	-1.1	-1.09	-1.4	-1.32	-1.32	-0.015	-2.695	-2.465	-1.975	-1.705	-2.075	-2.155	-1.995	-1.805	0.26	-0.57	-0.73	-2.01	-1.92	-1.7	-1.71	-1.66	-1.88	-1.16	-1.13	-0.88	-0.76	-0.44	-0.26	-2.07	-1.64	-0.98	-0.48	-0.33	-0.28	-1.82	-1.75	-1.25	-1.14	-0.78	-0.62	-0.2
YHL011C	PRS3	telomere maintenance*	transferase activity*	0	-2.11	-1.34	-1.23	-1.49	-1.2	-1.67	-1.95	-1.87	-0.03	-3.62	-2.46	-2.09	-2.66	-2.52	-2.35	-2.3	-2.25	0.08	-0.14	-0.41	-1.12	-1.6	-2.04	-2.06	-2	-2.18	-0.25	-0.16	-0.07	-0.02	0.23	0.24	-1.04	-0.52	-0.27	-0.11	-0.05	0.51	-0.485	-0.365	-0.105	0.015	0.225	0.275	-0.3
YHL039W	YHL039W	ribosome biogenesis and assembly	molecular_function	0	-2.14	-1.31	-1.09	-0.73	-0.61	-0.6	-0.79	-0.84	0.095	-3.395	-2.095	-0.915	-0.835	-0.965	-1.025	-1.105	-0.995	0.175	-0.335	-0.695	-1.255	-0.735	-0.995	-0.945	-0.685	-0.985	-0.36	-0.24	0.07	0	-0.06	-0.05	-1.03	-0.89	-0.52	-0.74	-0.66	-0.22	-0.77	-0.77	-0.86	-1.03	-0.84	-0.47	0.24
YHR020W	YHR020W	translation*	nucleotide binding*	0	-2.14	-1.66	-1.11	-1.72	-1.45	-1.98	-2.44	-2.36	0.17	-3.19	-2.47	-1.34	-1.45	-1.32	-1.34	-1.26	-1.24	0.235	0.235	-0.065	-1.835	-1.795	-2.005	-1.915	-2.045	-2.215	0.08	0.09	0.07	0.04	0.16	0.37	-0.01	-0.16	-0.48	-0.35	0.03	0.41	-1.04	-0.72	-0.66	-0.57	-0.26	-0.02	-0.0958976
YHR021C	RPS27B	translation*	metal ion binding*	0	-2.1	-2.17	-1.54	-1.5	-1.34	-1.52	-1.38	-1.66	-0.075	-4.585	-3.655	-2.095	-1.385	-1.615	-1.655	-1.515	-1.325	0.205	0.195	0.085	-3.685	-2.795	-2.415	-2.515	-2.705	-2.095	0.01	0.2	0.4	0.29	0.39	0.34	-1.02	-0.96	0.6	0.77	0.56	0.48	-0.585	-0.515	-0.525	-0.065	-0.485	-0.275	-0.36
YHR046C	INM1	inositol phosphate dephosphorylation	hydrolase activity*	0	-2.24	-1.63	-1.5	-1.71	-1.43	-2.16	-2.75	-2.83	0.055	-2.955	-1.945	-1.235	-1.245	-1.195	-1.245	-1.425	-1.285	0.25	-0.11	-0.18	0.61	1.66	1.61	1.41	1.56	0.98	-0.29	-0.06	-0.35	-0.31	-0.04	0.12	-0.96	-0.86	-0.51	-0.44	-0.16	-0.03	1.195	1.025	0.825	0.615	0.775	0.745	-0.20001
YHR062C	RPP1	rRNA processing*	hydrolase activity*	0	-2.11	-1.32	-0.96	-1.63	-1.59	-2.09	-2.29	-2.57	0.015	-2.465	-1.735	-1.485	-1.775	-1.785	-1.765	-1.715	-1.985	0.17	-0.34	-0.37	-1.33	-1.8	-1.93	-2.08	-2.04	-2.23	-1.01	-0.53	-0.16	-0.13	0.14	0.24	-1.31	-1.12	-1.23	-1.05	-0.28	0.19	-1.35	-1	-1.17	-1.1	-0.56	-0.68	-0.34
YHR064C	SSZ1	translation*	nucleotide binding*	0	-2.23	-1.38	-1.12	-1.96	-1.76	-2.43	-2.77	-2.87	0.135	-2.185	-1.895	-2.025	-2.575	-2.475	-2.465	-2.375	-2.475	0.305	0.175	0.035	-0.555	-1.205	-1.285	-1.165	-1.395	-1.305	-0.61	-0.43	0.14	0.15	0.19	0.29	-0.69	-0.68	-0.88	-0.44	-0.09	0.36	-0.37	-0.3	-0.21	-0.18	0.3	0.22	-0.16
YHR065C	RRP3	ribosome biogenesis and assembly*	nucleotide binding*	0	-1.33	-1.07	-0.92	-1.39	-1.39	-1.91	-2.33	-2.25	-0.07	-3.2	-1.89	-1.52	-1.65	-1.56	-1.62	-1.66	-1.88	0.065	-0.245	-0.335	-0.725	-0.815	-0.895	-0.855	-1.005	-0.885	-0.67	-0.45	-0.19	-0.28	-0.19	-0.18	-0.92	-1.09	-0.72	-0.41	-0.06	-0.11	-0.035	0.245	0.335	0.285	0.475	0.255	-0.12
YHR066W	SSF1	ribosomal large subunit assembly and maintenance*	rRNA binding	0	-3.49	-2.2	-1.01	-1.2	-1.11	-1.84	-2.28	-1.65	0.09	-4.48	-2.56	-1.06	-1.11	-1.37	-1.64	-1.58	-1.53	0.31	-0.27	-0.39	-1.04	-1	-0.94	-0.88	-1.01	-1.21	-0.64	-0.47	-0.12	-0.24	-0.09	0.2	-0.62	-0.35	-0.16	0.32	0.2	0.16	-0.715	-0.645	-0.365	-0.445	-0.135	-0.235	0.235221
YHR085W	IPI1	rRNA processing*	molecular_function	0	-2.99	-2.07	-1.38	-1	-0.93	-0.92	-0.91	-0.64	-0.07	-3.35	-1.74	-0.59	-0.38	-0.44	-0.51	-0.51	-0.62	0.19	-0.29	-0.39	-0.74	-0.55	-0.77	-0.64	-0.39	-0.69	-0.32	-0.29	-0.45	-0.58	-0.26	0.05	-0.48	-0.21	0.22	0.09	0.32	0.13	-0.13	-0.03	-0.06	-0.29	-0.05	0.29	-0.16
YHR088W	RPF1	ribosome biogenesis and assembly*	RNA binding*	0	-3.77	-1.96	-0.76	-0.92	-0.44	-0.63	-0.66	-0.46	0.05	-4.78	-1.51	-0.45	-0.51	-0.23	-0.18	-0.18	-0.18	0.275	-0.595	-0.575	-0.345	-0.605	-0.405	-0.285	0.105	0.055	0.64	0.54	0.02	-0.3	-0.26	0.06	0.44	0.72	0.72	0.49	0.37	-0.14	-0.23	0.02	-0.1	-0.3	-0.17	-0.48	0.00176787
YHR143W-A	RPC10	transcription*	transferase activity*	0	-1.34	-1.21	-1.11	-1.7	-1.61	-1.46	-1.34	-1.14	-0.04	-2.16	-2.07	-1.76	-1.94	-1.9	-1.86	-1.73	-1.55	0.415	0.055	-0.085	-0.775	-1.325	-1.165	-1.205	-0.915	-1.075	-0.38	0.15	-0.16	-0.29	0.1	-0.02	-1.3	-0.59	0.48	0.16	0.36	0.11	-0.02	0.04	0.27	0.51	0.29	0.63	-0.67
YHR148W	IMP3	translation*	RNA binding*	0	-2.79	-2.11	-1.41	-1.08	-0.86	-0.93	-1.05	-0.86	0	-3.88	-2.97	-1.85	-2.13	-1.95	-1.94	-2.07	-2.01	0.27	-0.48	-0.74	-1.79	-1.78	-1.85	-1.66	-1.57	-1.93	-0.88	-0.73	-0.67	-0.6	-0.24	0.1	-1.51	-1.06	-0.42	-0.24	0.02	0.05	-1.315	-1.165	-0.785	-0.885	-0.475	-0.505	0.03
YHR169W	DBP8	ribosome biogenesis and assembly*	nucleotide binding*	0	-3.52	-2.25	-1.24	-1.42	-1.14	-1.45	-1.4	-1.24	-0.115	-4.525	-1.965	-1.055	-0.545	-0.435	-0.575	-0.605	-0.895	0.065	-0.615	-0.665	-0.925	-0.985	-1.075	-0.945	-1.175	-1.095	-0.52	-0.69	-0.48	-0.46	-0.39	-0.09	-0.46	-0.64	-0.84	-0.84	-0.49	-0.18	-0.76	-0.61	-0.72	-0.63	-0.4	-0.37	-0.31
YHR170W	NMD3	ribosome biogenesis and assembly*	zinc ion binding*	0	-3.52	-2.23	-1.14	-1.25	-0.91	-1.24	-1.25	-0.94	0.05	-5.48	-2.98	-1.87	-2.16	-2.22	-2.44	-2.3	-2.32	0.3	-0.57	-0.79	-1.66	-1.86	-2.15	-2.14	-2.11	-2.29	-0.73	-0.49	-0.56	-0.56	-0.33	-0.18	-1.2	-1.11	-0.74	-0.74	-0.25	-0.24	-0.825	-0.595	-0.435	-0.265	-0.055	-0.065	-0.01
YHR196W	UTP9	ribosome biogenesis and assembly*	snoRNA binding	0	-2.96	-2.36	-1.55	-1.87	-1.66	-2.04	-2.28	-1.69	0.085	-5.045	-3.385	-2.575	-2.615	-2.725	-2.835	-2.725	-2.505	0.385	-0.245	-0.485	-1.815	-1.805	-1.615	-1.675	-1.675	-1.685	-0.9	-0.62	-0.47	-0.55	-0.29	-0.03	-1.98	-1.54	-0.11	0.09	0.19	-0.07	-1.04	-0.88	-0.63	-0.38	-0.3	-0.34	-0.24
YIL019W	FAF1	ribosome biogenesis and assembly*	molecular_function	0	-4.76	-3.15	-1.08	-1.18	-0.48	-0.69	-0.54	0.16	-0.11	-5.06	-1.97	-0.64	-0.7	-0.49	-0.46	-0.29	-0.34	0.325	-0.655	-0.825	-0.895	-0.455	-0.225	-0.075	-0.025	-0.055	-0.28	-0.07	-0.25	-0.43	-0.28	0.08	-0.5	-0.53	-0.51	-0.31	-0.18	-0.22	-0.69	-0.69	-0.76	-0.93	-0.77	-0.91	0.18
YIL053W	RHR2	metabolic process*	hydrolase activity*	0	-3.58	-2.23	-2.87	-0.23	0.44	-1.18	-1.68	-0.98	-0.485	-2.875	-2.195	-1.115	-2.455	-3.125	-3.445	-3.565	-4.145	-0.245	-0.035	0.285	-0.245	-0.075	-0.925	-0.815	-0.895	-1.545	0.46	-0.19	-1.73	-1.96	-0.77	0.19	-0.38	-0.54	-1.13	-1.15	-0.71	-0.09	0.48	0.12	-0.35	-0.55	-0.04	0.43	0.216715
YIL064W	YIL064W	metabolic process*	transferase activity*	0	-2.22	-0.97	-0.3	-0.3	-0.05	-0.07	-0.3	0.1	-0.095	-4.645	-2.355	-0.865	-0.855	-0.755	-0.755	-0.825	-0.865	0.33	-0.03	-0.83	-1.68	-1.01	-0.86	-0.86	-0.69	-0.74	-0.59	-0.09	-0.1	0.1	0.28	0.2	-1.58	-1.06	-0.59	-0.57	-0.19	-0.1	-1.295	-1.185	-0.905	-0.735	-0.715	-0.525	-0.244763
YIL079C	AIR1	mRNA export from nucleus*	metal ion binding*	0	-2.98	-2.68	-1.93	-2.11	-2.01	-2.1	-2.07	-1.77	-0.145	-4.045	-3.175	-2.075	-1.995	-1.895	-1.845	-1.825	-1.235	0.01	-0.65	-1.04	-1.87	-1.31	-1.28	-1.21	-1.14	-1.2	-0.87	-0.51	-0.63	-0.68	-0.32	0.02	-1.4	-1.13	-0.97	-0.59	-0.49	-0.17	-0.915	-0.885	-0.605	-0.675	-0.145	-0.135	-0.0716898
YIL091C	YIL091C	biological_process	RNA helicase activity	0	-2.92	-1.95	-1.35	-1.25	-0.94	-1.47	-1.7	-1.49	0.075	-4.375	-2.935	-1.515	-1.475	-1.475	-1.545	-1.495	-1.395	0.275	-0.485	-0.625	-0.775	-0.105	-0.445	-0.595	-0.475	-0.765	-0.69	-0.45	-0.27	-0.54	-0.3	-0.02	-0.7	-0.81	-0.39	-0.31	-0.05	-0.05	-0.01	-0.01	0.02	-0.15	-0.01	-0.11	0.12
YIL103W	DPH1	peptidyl-diphthamide biosynthetic process from peptidyl-histidine	molecular_function	0	-3.1	-1.88	-1.32	-1.06	-0.69	-0.8	-0.83	-0.43	-0.06	-4.68	-2.72	-1.96	-1.73	-1.49	-1.6	-1.48	-1.48	0.055	-0.635	-0.855	-1.975	-1.785	-1.905	-1.815	-1.755	-2.005	-0.76	-0.64	-0.53	-0.37	-0.02	0.09	-1.64	-1.14	-0.52	-0.4	-0.06	0.1	-0.66	-0.48	-0.24	-0.12	0.17	0.22	-0.13
YIL127C	YIL127C	ribosome biogenesis and assembly	molecular_function	0	-3	-2.42	-1.65	-1.4	-1.12	-0.95	-1.1	-0.68	-0.02	-5.15	-3.42	-2.55	-2.47	-2.38	-2.37	-2.02	-1.9	0.495	-0.125	-0.355	-1.375	-1.455	-1.145	-1.225	-1.235	-1.585	-0.93	-0.5	-0.6	-0.7	-0.33	0.02	-2.23	-1.37	-0.37	-0.01	0.01	-0.17	0.015	-0.135	0.225	0.175	0.305	0.355	0.21
YJL010C	YJL010C	ribosome biogenesis and assembly*	molecular_function*	0	-2.63	-2.06	-1.68	-1.63	-1.5	-1.62	-2.13	-1.82	0.02	-3.99	-2.46	-1.59	-1.71	-1.54	-1.5	-1.55	-1.64	0.375	-0.305	-0.615	-0.945	-0.875	-1.045	-0.945	-0.865	-0.995	-0.97	-0.66	-0.71	-0.63	-0.42	-0.06	-0.94	-1.06	-0.45	-0.4	-0.18	-0.15	-0.055	0.105	0.075	-0.125	0.165	0.055	0.03
YJL033W	HCA4	ribosome biogenesis and assembly*	nucleotide binding*	0	-4.06	-2.33	-1.14	-0.75	-0.48	-1.1	-1.35	-1.03	0.07	-5.18	-2.56	-1.27	-1.41	-1.23	-1.08	-0.86	-0.87	0.445	-0.495	-0.605	-1.005	-0.785	-0.745	-0.625	-0.575	-0.545	-0.22	-0.6	-0.3	-0.43	-0.25	-0.01	-0.28	-0.23	-0.3	-0.08	-0.02	-0.08	-0.33	-0.26	-0.24	-0.44	-0.25	-0.19	0.16
YJL035C	TAD2	tRNA processing*	hydrolase activity*	0	-1.46	-1.82	-1.64	-2.03	-2.16	-1.77	-1.63	-0.59	-0.135	-1.415	-2.185	-2.455	-2.105	-1.625	-1.315	-1.185	-0.845	0.185	0.335	0.355	-1.195	-1.785	-1.445	-1.405	-1.275	-1.175	-0.37	-0.2	-0.33	-0.2	0	0.08	-1.67	-1.2	-0.37	-0.54	-0.23	-0.23	-0.755	-0.755	-0.635	-0.405	-0.215	0.215	-0.115549
YJL050W	MTR4	ribosome biogenesis and assembly*	nucleotide binding*	0	-4.01	-2.46	-1.46	-1.42	-0.98	-1.8	-2.21	-1.77	0.015	-5.445	-2.735	-1.565	-1.435	-1.175	-1.205	-1.295	-1.275	0.385	-0.175	-0.425	-1.155	-1.155	-1.235	-1.185	-1.245	-1.165	-0.53	-0.53	-0.22	-0.25	-0.08	0.03	-0.6	-0.69	-0.37	-0.12	0.05	-0.06	-0.02	0.12	0.17	0.17	0.3	0.23	0.04
YJL069C	UTP18	ribosome biogenesis and assembly*	molecular_function	0	-2.46	-2.02	-1.4	-1.57	-1.55	-1.83	-1.73	-1.42	-0.005	-3.175	-2.165	-1.705	-1.725	-1.785	-1.785	-1.735	-1.635	0.19	-0.39	-0.47	-1.17	-1.12	-1.37	-1.33	-1.31	-1.51	-0.65	-0.71	-0.35	-0.18	0.06	0.13	-0.5	-0.36	-0.77	-0.72	-0.37	0.3	-1.12	-0.93	-0.76	-0.81	-0.26	-0.19	-0.257561
YJL109C	UTP10	ribosome biogenesis and assembly*	snoRNA binding	0	-2.74	-2.21	-1.64	-1.82	-1.54	-2.23	-2.33	-2.15	-0.07	-4.49	-2.71	-1.85	-2.01	-1.81	-1.66	-1.62	-1.36	0.295	-0.235	-0.595	-1.565	-1.735	-1.945	-1.675	-1.795	-1.665	-0.74	-0.48	-0.22	-0.3	0.06	0.22	-0.9	-0.7	-0.27	-0.21	-0.14	0.25	-0.36	-0.38	-0.16	0.11	0.14	0.44	0.04
YJL122W	ALB1	ribosome biogenesis and assembly*	molecular_function	0	-3.3	-2.65	-1.76	-2.13	-1.83	-2.34	-2.68	-1.8	0.025	-4.415	-2.985	-2.185	-2.305	-1.905	-1.865	-2.035	-2.215	0.415	-0.245	-0.555	-1.235	-1.435	-1.605	-1.455	-1.775	-1.575	-1.03	-0.91	-0.85	-0.91	-0.34	0.04	-1.25	-1.15	-0.4	-0.36	0.03	-0.16	0.425	0.395	0.605	0.495	0.705	0.455	-0.229765
YJL198W	PHO90	transport*	citrate transmembrane transporter activity*	0	-1.98	-1.86	-0.89	-1	-0.69	-0.54	-0.13	-0.45	-0.4	-2.88	-1.49	-1.33	-1.83	-1.64	-1.55	-1.38	-1.39	-0.33	-0.53	-0.81	-1.78	-2.11	-1.65	-1.65	-1.71	-1.74	-0.33	-0.57	-0.73	-0.73	-0.08	0	-0.33	0.03	-0.69	-0.41	-0.26	0.18	-1.12	-0.64	-0.69	-0.27	-0.15	0.41	-0.261125
YJR002W	MPP10	ribosome biogenesis and assembly*	molecular_function	0	-2.55	-1.84	-1.27	-0.93	-0.55	-0.62	-0.73	-0.81	0.03	-3.55	-2.1	-1.19	-1.21	-1.33	-1.3	-1.3	-1.25	0.21	-0.53	-0.83	-1.03	-0.84	-1.09	-0.88	-0.68	-0.91	-0.17	-0.35	-0.25	-0.25	-0.19	-0.04	0.13	-0.07	-0.19	-0.43	-0.19	-0.05	-0.33	-0.15	0	-0.14	0.18	0	0.188709
YJR041C	URB2	ribosome biogenesis and assembly*	molecular_function	0	-2.12	-1.77	-1.27	-1.27	-1.02	-1.88	-1.94	-1.82	-0.04	-3.3	-2.08	-1.42	-1.49	-1.16	-1.14	-1.2	-1.1	0.275	-0.345	-0.535	-1.145	-1.135	-1.025	-0.875	-0.935	-0.655	-0.7	-0.51	-0.4	-0.33	0.03	0.23	-1.37	-1.08	-0.2	-0.19	0.06	0.27	-0.415	-0.395	-0.235	0.045	-0.035	0.055	-0.02
YJR123W	RPS5	translation	structural constituent of ribosome	0	-0.94	-1.24	-0.61	-0.82	-1.06	-1.61	-2.18	-3.17	-0.21	-2.64	-3.1	-1.14	-1.14	-1.66	-1.7	-1.47	-1.43	-0.055	-0.935	-0.185	-3.565	-2.545	-2.375	-2.195	-1.665	-1.725	0.38	0.17	0.39	0.11	0.23	0.35	-0.87	-0.43	0.23	0.24	0.18	0.19	1.29	1.39	1.39	1.32	1.55	1.33	-0.276945
YKL014C	URB1	rRNA processing*	molecular_function	0	-2.7	-2.11	-1.39	-1.84	-1.85	-2.1	-2.02	-1.88	0.035	-4.475	-2.615	-1.725	-1.775	-1.285	-1.145	-0.915	-0.985	0.54	0.04	-0.32	-1.28	-1.38	-1.58	-1.16	-0.85	-0.59	-0.53	-0.32	-0.17	-0.25	-0.07	0.03	-0.52	-0.39	-0.12	-0.08	0	0.07	0.045	0.265	0.375	0.425	0.575	0.585	0.12
YKL021C	MAK11	ribosome biogenesis and assembly*	molecular_function	0	-1.54	-1.23	-0.82	-1.29	-1.14	-1.6	-2.03	-1.95	0.08	-2.82	-1.74	-1.05	-1.27	-1.24	-1.17	-1.27	-1.54	0.22	-0.23	-0.58	-0.78	-0.75	-1.14	-1.05	-0.92	-1.37	-0.09	-0.04	-0.37	-0.37	-0.14	0.07	-0.35	-0.2	-0.01	-0.16	-0.04	-0.11	-0.195	-0.005	-0.025	-0.175	0.205	0.075	-0.17
YKL029C	MAE1	amino acid metabolic process*	metal ion binding*	0	-4.36	-2.76	-0.68	-1.52	-1.05	-1.65	-1.56	-1	-0.035	-4.295	-2.505	-1.625	-1.665	-1.785	-1.805	-1.785	-1.835	0.235	-0.345	-0.935	-0.205	-0.575	-0.805	-0.915	-1.035	-1.275	0.1	-0.05	-0.49	-0.58	-0.23	0.16	0.25	0.33	-1.19	-1.06	-0.96	-0.03	-0.99	-0.62	-0.96	-0.99	-0.62	-0.49	-0.364308
YKL078W	DHR2	ribosome biogenesis and assembly*	nucleotide binding*	0	-5.4	-3.92	-1.83	-2.29	-1.86	-2.78	-3.13	-2.56	-0.015	-4.815	-2.925	-1.425	-1.565	-1.385	-1.345	-1.305	-1.405	0.285	-1.045	-1.065	-1.375	-1.355	-1.185	-0.845	-0.605	-0.695	-0.55	-0.38	-0.55	-0.68	-0.07	0.23	-0.62	-0.52	-0.29	-0.45	-0.18	0.09	0.38	0.4	0.47	0.5	0.62	1.07	0.17
YKL099C	UTP11	ribosome biogenesis and assembly*	snoRNA binding	0	-3.44	-2.32	-1.5	-1.46	-1.25	-1.58	-1.67	-0.94	-0.115	-4.415	-1.965	-1.225	-1.245	-1.095	-1.085	-0.865	-0.965	0.345	-0.575	-0.605	-0.925	-0.965	-0.925	-0.995	-1.135	-1.165	-0.39	-0.32	-0.62	-0.87	-0.56	-0.19	-1.15	-0.8	-0.14	0.06	0.03	-0.32	0.48	0.39	0.39	0.32	0.36	0.12	0
YKL143W	LTV1	ribosome biogenesis and assembly*	molecular_function	0	-4.1	-2.27	-0.98	-0.88	-0.51	-1.17	-1.61	-1.08	0.06	-4.77	-2.79	-1.01	-1.18	-1.04	-1.05	-0.99	-0.95	0.24	-0.64	-0.78	-0.87	-0.54	-0.62	-0.49	-0.47	-0.55	-0.31	-0.5	-0.45	-0.56	-0.33	0.01	-0.68	-0.47	-0.67	-0.47	-0.26	-0.23	0.055	0.215	0.105	-0.015	0.195	-0.075	0.03
YKL166C	TPK3	protein amino acid phosphorylation*	nucleotide binding*	0	-1.92	-1.47	-1.23	-1.55	-1.39	-1.41	-1.29	-1.05	-0.12	-1.96	-1.93	-1.73	-2.01	-2.01	-2.22	-1.99	-2.19	-0.235	-0.365	-0.925	-1.635	-1.995	-2.125	-2.225	-2.385	-2.415	-0.89	-0.34	-0.43	-0.42	-0.08	-0.08	-0.71	-0.84	-0.7	-0.47	-0.36	-0.07	-1.13	-0.91	-0.71	-0.77	-0.59	-0.94	-0.540036
YKL172W	EBP2	ribosome biogenesis and assembly*	molecular_function	0	-3.19	-2.11	-1.51	-1.95	-1.78	-2.26	-2.75	-1.93	0.13	-5.51	-2.79	-1.86	-2.4	-2.52	-2.53	-2.33	-2.56	0.35	-0.25	-0.45	-1	-1.21	-1.55	-1.3	-1.55	-1.8	-0.62	-0.84	-0.55	-0.59	-0.38	-0.14	-0.75	-1.08	-1.03	-0.15	-0.12	-0.22	-0.6	-0.49	-0.36	-0.7	-0.39	-0.76	-0.08
YKL181W	PRS1	histidine biosynthetic process*	transferase activity*	0	-1.63	-1.21	-0.65	-1.39	-1.12	-1.58	-1.63	-1.36	0.035	-2.805	-1.665	-1.035	-1.605	-1.635	-1.555	-1.535	-1.515	0.035	-0.135	-0.405	-1.075	-1.055	-1.275	-1.375	-1.285	-1.515	0.27	0.34	0.26	0.01	0.17	0.27	0.02	0.04	0.18	0.26	0.15	0.29	-0.325	-0.215	-0.225	-0.235	-0.225	-0.335	-0.415606
YKL191W	DPH2	ribosome biogenesis and assembly*	molecular_function	0	-3	-1.62	-0.82	-0.64	-0.56	-0.89	-1.05	-1.18	-0.065	-3.635	-1.875	-0.685	-0.165	-0.135	-0.135	-0.105	-0.295	0.28	-0.2	-0.55	-0.84	-0.41	-0.54	-0.63	-0.55	-0.81	0.07	-0.09	0.2	0.32	0.31	0.43	-0.14	-0.15	-1.04	-0.85	-0.7	0.22	-0.91	-0.77	-0.95	-0.86	-0.59	-0.47	0.290763
YKR024C	DBP7	ribosome biogenesis and assembly*	nucleotide binding*	0	-3.1	-2.16	-1.36	-1.25	-0.99	-1.33	-1.55	-1.09	-0.045	-4.775	-2.385	-1.485	-1.385	-1.475	-1.535	-1.525	-1.585	0.225	-0.715	-0.725	-1.045	-0.725	-0.765	-0.595	-0.545	-0.585	-0.41	-0.32	-0.35	-0.45	-0.27	-0.23	-0.07	-0.2	-0.37	-0.45	-0.34	-0.25	0.475	0.645	0.555	0.355	0.505	0.815	0.25
YKR056W	TRM2	ribosome biogenesis and assembly*	transferase activity*	0	-2.57	-1.34	-0.86	-1.47	-1.51	-2.18	-2.18	-1.97	0.01	-3.15	-1.1	-0.72	-0.99	-1.1	-1.13	-1.15	-1.19	0.185	-0.405	-0.575	-0.795	-1.255	-1.365	-1.325	-1.465	-1.285	-0.31	-0.46	-0.07	-0.11	0.03	0.16	-0.46	-0.43	-0.46	-0.34	-0.27	0.09	-0.615	-0.595	-0.565	-0.585	-0.385	-0.325	0.13818
YKR079C	TRZ1	tRNA processing*	hydrolase activity*	0	-1.92	-1.39	-1.45	-1.08	-0.66	-0.71	-0.69	-0.86	-0.24	-4.47	-3.14	-1.67	-1.77	-1.73	-1.88	-1.77	-1.72	0.09	-0.42	-0.8	-1.78	-0.78	-0.97	-0.78	-0.92	-0.96	-0.79	-0.95	-0.58	-0.36	-0.07	0.09	-1.21	-1.05	-0.41	-0.3	-0.18	-0.1	-0.465	-0.525	-0.265	-0.085	0.085	0.285	-0.05
YKR080W	MTD1	purine nucleotide biosynthetic process*	catalytic activity*	0	-2.84	-2.42	-1.77	-1.54	-1.51	-1.05	-1.05	-0.85	0.1	-2.29	-1.86	-1.56	-1.92	-1.7	-1.59	-1.59	-1.7	0.33	0.08	-0.5	-0.61	-0.62	-0.52	-0.41	-0.56	-0.74	-0.18	0.13	-0.27	-0.18	-0.23	-0.05	-0.6	-0.64	-0.23	-0.19	-0.18	-0.33	0.64	0.47	0.33	0.13	0.3	0.29	-0.568849
YKR081C	RPF2	ribosome biogenesis and assembly*	rRNA binding*	0	-3.21	-2.27	-1.62	-1.79	-1.6	-2.17	-2.46	-2.12	0.02	-5.76	-3.39	-2.06	-2.37	-2.3	-2.31	-2.39	-2.49	0.21	-0.44	-0.88	-1.72	-1.52	-1.4	-1.33	-1.25	-1.52	-0.66	-0.48	-0.57	-0.52	-0.04	0.16	-1.56	-1.2	-0.29	-0.26	0.1	0.09	-0.91	-0.81	-0.45	-0.66	-0.28	-0.36	0.06
YLL008W	DRS1	ribosome biogenesis and assembly*	nucleotide binding*	0	-3.74	-2.15	-1.39	-1.04	-0.69	-1.57	-2.13	-1.59	0.035	-5.315	-3.295	-2.065	-2.135	-1.565	-1.555	-1.445	-1.455	0.31	-0.38	-0.57	-1.44	-1.31	-1.23	-0.9	-0.83	-1	-0.87	-0.76	-0.38	-0.27	-0.15	-0.17	-0.57	-0.35	-0.55	-0.3	-0.15	-0.15	-1.27	-0.99	-0.91	-0.99	-0.7	-0.77	0.04
YLL011W	SOF1	rRNA processing*	molecular_function	0	-2.4	-1.7	-1.16	-1.48	-1.35	-1.78	-2.23	-1.55	0.005	-4.765	-2.895	-1.825	-2.105	-2.245	-2.175	-2.135	-1.855	0.26	-0.23	-0.37	-1.02	-1.05	-1.24	-1.04	-1.04	-1.07	-0.79	-0.44	-0.24	-0.31	-0.09	0.04	-1.29	-0.91	-0.11	0.01	0.15	-0.13	0.39	0.47	0.54	0.54	0.56	0.53	-0.01
YLL034C	RIX7	ribosomal large subunit export from nucleus	nucleotide binding*	0	-3.73	-2.75	-1.88	-1.6	-1.16	-1.5	-1.73	-1.42	-0.04	-4.39	-2.74	-1.78	-1.64	-1.51	-1.66	-1.69	-1.78	0.225	-0.545	-0.715	-1.435	-1.295	-1.345	-1.105	-0.955	-1.035	-0.65	-0.76	-0.69	-0.78	-0.26	-0.11	-0.45	-0.46	-0.37	-0.27	-0.12	0.01	-0.235	-0.055	0.055	-0.105	0.355	0.525	0.11
YLL035W	GRC3	ribosome biogenesis and assembly*	molecular_function	0	-2.45	-1.94	-1.54	-1.56	-1.5	-1.82	-1.75	-1.78	-0.06	-1.89	-1.81	-1.13	-1.19	-1.1	-1.3	-1.29	-1.29	0.09	-0.52	-0.62	-1.36	-0.97	-1.05	-0.82	-0.76	-0.92	-0.54	-0.62	-0.33	-0.19	-0.04	0.22	-0.79	-0.9	-0.63	-0.2	-0.03	0.34	0.005	-0.255	-0.085	0.045	0.375	0.835	0.0198268
YLR002C	NOC3	cell cycle*	protein binding*	0	-2.72	-1.84	-1.35	-1.55	-1.43	-1.94	-2.01	-2.11	0.045	-4.595	-2.425	-1.565	-1.735	-1.725	-1.825	-1.745	-1.895	0.265	-0.395	-0.635	-1.245	-1.575	-1.625	-1.495	-1.465	-1.595	-0.7	-0.63	-0.21	-0.07	0.1	0.24	-0.73	-0.57	-0.71	-0.46	-0.2	0.26	-1.145	-1.095	-1.005	-0.985	-0.825	-0.475	-0.01
YLR003C	YLR003C	ribosome biogenesis and assembly*	molecular_function	0	-2.42	-1.61	-0.94	-1.21	-1.05	-1.59	-1.59	-2.03	0.06	-3.73	-1.69	-1.2	-1.29	-1.29	-1.21	-1.09	-1.27	0.42	-0.32	-0.5	-0.71	-0.83	-0.84	-0.88	-0.85	-0.9	0.05	0.31	-0.3	-0.51	-0.17	0.29	-0.69	-0.49	0.31	0.38	0.26	0.07	-0.05	-0.16	-0.37	-0.32	-0.48	-0.69	-0.08
YLR017W	MEU1	glutamate biosynthetic process*	transferase activity*	0	-2.02	-1.59	-1.08	-1.18	-1.08	-1.59	-1.58	-1.62	-0.035	-3.025	-1.505	-1.295	-1.585	-1.535	-1.485	-1.495	-1.535	0.215	-0.115	-0.305	-0.985	-0.995	-1.055	-0.975	-0.935	-1.055	-0.32	-0.53	-0.13	-0.06	0.07	0.12	-0.87	-0.69	-0.87	-0.67	-0.59	0.11	-0.43	-0.49	-0.62	-0.54	-0.16	0.28	-0.000622858
YLR020C	YEH2	lipid metabolic process*	hydrolase activity*	0	-1.27	-1.55	-1.71	-2.08	-2.14	-1.84	-1.69	-1.33	-0.56	-1.33	-2.09	-2.2	-2.47	-2.36	-2.23	-2.26	-2.05	-0.6	-0.8	-0.87	-1.75	-1.7	-1.81	-1.75	-1.7	-1.6	-0.96	-0.95	-0.99	-0.81	-0.57	-0.41	-1.29	-1.31	-0.61	-0.52	-0.19	-0.37	-0.725	-0.585	-0.445	-0.265	-0.155	0.305	-0.87
YLR063W	YLR063W	biological_process	molecular_function	0	-3.4	-2.81	-1.74	-2.23	-1.9	-2.62	-2.83	-2.62	-0.31	-2.84	-2.14	-1.5	-1.38	-1.81	-1.83	-1.82	-2.02	0.06	-0.87	-0.81	-1.59	-1.23	-1.57	-1.57	-2.02	-2.02	-0.51	-0.67	-0.85	-0.56	-0.34	-0.31	-0.66	-0.85	-0.74	-0.81	-0.59	-0.15	0.775	0.755	0.335	0.455	0.645	0.765	0.388574
YLR068W	FYV7	rRNA processing*	molecular_function	0	-2.68	-1.67	-1.09	-0.43	0.12	0.61	0.28	0.84	-0.125	-4.025	-2.305	-1.245	-1.225	-1.115	-1.005	-0.805	-0.945	0.375	-0.345	-0.445	-0.745	-0.755	-0.405	-0.305	-0.205	-0.335	-0.61	-0.59	-0.89	-0.86	-0.38	-0.33	-0.94	-0.29	0.03	0.17	0.21	-0.33	0.62	0.62	0.63	0.62	0.76	0.8	0.11
YLR074C	BUD20	ribosome biogenesis and assembly*	molecular_function*	0	-2.26	-1.66	-1.09	-0.82	-0.77	-1.08	-1.13	-0.71	-0.17	-4.12	-1.68	-0.62	-0.94	-1.01	-0.97	-0.9	-0.95	0.22	-0.46	-0.62	-0.54	-0.12	-0.3	-0.21	-0.38	-0.28	-0.3	-0.27	-0.51	-0.5	-0.42	-0.13	-0.9	-1.06	-0.77	-0.63	-0.37	-0.4	-0.525	-0.545	-0.395	-0.555	-0.465	-0.475	0.0573399
YLR129W	DIP2	ribosome biogenesis and assembly*	snoRNA binding	0	-2.74	-1.94	-1.42	-1.69	-1.38	-2.17	-2.51	-2.09	0.015	-5.785	-3.255	-2.305	-2.595	-2.575	-2.635	-2.665	-2.605	0.31	-0.22	-0.38	-1.25	-1.32	-1.49	-1.37	-1.31	-1.45	-1.15	-0.9	-0.55	-0.62	-0.32	-0.28	-0.9	-0.8	-0.4	-0.33	-0.13	-0.12	-0.29	0.09	0.28	0.39	0.44	0.35	0.02
YLR130C	ZRT2	transport*	zinc ion binding*	0	-1.1	-1.53	-1.79	-1.17	-1.26	-1.56	-1.59	-1.44	-1.045	-2.675	-2.235	-1.385	-1.255	-1.395	-1.515	-1.565	-1.745	-1.335	-1.495	-1.635	-1.165	-0.335	-0.395	-0.535	-0.605	-1.255	-1.78	-1.43	-1.05	-0.62	-0.92	-1.06	-1.04	-0.85	-1.18	-1.42	-1.39	-1.26	-0.53	-0.53	-0.53	-0.52	-0.72	-0.82	-0.44
YLR150W	STM1	telomere maintenance*	DNA binding*	0	-0.76	-0.68	-0.75	-0.73	-0.9	-1.2	-1.81	-2.64	0.02	-1.91	-3.01	-1.53	-2.01	-2.54	-2.67	-2.68	-2.91	0.095	0.135	0.065	-2.225	-1.545	-1.725	-1.555	-1.565	-2.115	-0.57	-0.89	-0.32	-0.25	-0.35	-0.28	-0.46	-0.63	-0.68	-0.72	-0.41	-0.46	-0.59	-0.37	-0.28	-0.28	-0.06	-0.36	-0.075221
YLR221C	RSA3	ribosomal large subunit assembly and maintenance	molecular_function	0	-2.69	-1.84	-1.3	-1.73	-1.4	-1.37	-1.5	-0.94	-0.055	-3.805	-2.035	-1.535	-1.685	-1.425	-1.395	-1.165	-1.055	0.16	-0.39	-0.56	-1.16	-1.45	-1.48	-1.32	-1.28	-1.42	-0.14	-0.06	-0.43	-0.58	-0.25	-0.01	-1.1	-0.38	0.49	0.35	0.34	-0.19	-0.19	-0.01	0.23	0.33	0.42	-0.06	-0.44
YLR222C	UTP13	rRNA processing*	snoRNA binding	0	-2.53	-1.79	-1.16	-1.24	-1.03	-1.9	-2.3	-2	0.06	-5.55	-3.72	-2.5	-2.62	-3	-3.19	-3.16	-3.23	0.29	-0.08	-0.39	-1.4	-1.44	-1.68	-1.56	-1.39	-1.58	-0.6	-0.61	-0.24	-0.2	0.04	0.2	-1.37	-0.95	-0.24	0.06	0.22	0.19	-0.175	0.015	0.075	0.155	0.345	0.385	0.14
YLR276C	DBP9	ribosome biogenesis and assembly*	nucleotide binding*	0	-2.79	-1.57	-1.19	-1.31	-1.07	-1.74	-2.07	-1.6	0.12	-4.23	-2.14	-1.57	-1.86	-1.87	-1.92	-1.83	-1.87	0.415	-0.235	-0.475	-0.995	-1.115	-1.205	-1.165	-1.225	-1.395	-0.51	-0.42	-0.39	-0.53	-0.31	-0.16	-1.14	-0.97	-0.05	-0.13	0.1	-0.12	0.065	0.035	0.255	0.185	0.215	0.015	0.06
YLR333C	RPS25B	translation	structural constituent of ribosome	0	-2.1	-2.29	-1.66	-1.57	-1.49	-1.83	-1.96	-2.12	-0.055	-3.665	-2.835	-1.795	-1.555	-1.745	-1.775	-1.745	-1.665	0.25	0.02	-0.26	-2.87	-2.44	-2.17	-2.17	-2.28	-2	-0.07	0.26	-0.04	-0.15	0.03	0.05	-1.1	-1.27	0.05	0.01	0.09	-0.04	-0.405	-0.365	-0.155	-0.005	-0.135	0.045	-0.182857
YLR333C	RPS25B	translation	structural constituent of ribosome	0	-2.1	-2.29	-1.66	-1.57	-1.49	-1.83	-1.96	-2.12	-0.055	-3.665	-2.835	-1.795	-1.555	-1.745	-1.775	-1.745	-1.665	0.25	0.02	-0.26	-2.87	-2.44	-2.17	-2.17	-2.28	-2	-0.07	0.26	-0.04	-0.15	0.03	0.05	-1.1	-1.27	0.05	0.01	0.09	-0.04	-0.405	-0.365	-0.155	-0.005	-0.135	0.045	-0.182857
YLR355C	ILV5	amino acid biosynthetic process*	oxidoreductase activity*	0	-0.82	-1.13	-0.1	-1.01	-1.11	-1.76	-1.92	-2.48	0.24	-3.3	-2.71	-1.06	-1.18	-1.61	-1.93	-1.76	-0.7	0.115	0.485	0.145	-1.145	-0.935	-1.395	-1.375	-1.305	-1.695	-0.19	-0.3	-0.32	-0.15	0.04	0.31	0.05	-0.29	-0.89	-0.67	-0.44	0.24	-1.03	-0.56	-0.68	-0.83	-0.19	-0.18	-0.203066
YLR401C	DUS3	metabolic process*	zinc ion binding*	0	-2.77	-1.86	-1.35	-0.94	-0.47	-1.04	-1.25	-1.21	-0.13	-5.14	-3.9	-2.92	-2.2	-1.73	-1.62	-1.33	-1.18	0.25	-0.34	-0.77	-2.07	-1.83	-1.67	-1.55	-1.53	-2.01	-1.08	-0.78	-0.27	-0.15	-0.04	0.07	-1.34	-1.2	-1.61	-1.51	-0.68	-0.05	-1.315	-0.845	-0.815	-0.775	-0.225	-0.305	-0.200418
YLR405W	DUS4	metabolic process*	catalytic activity*	0	-1.63	-1.4	-1	-1.31	-1.21	-1.33	-1.14	-1.02	-0.045	-2.185	-1.785	-1.155	-1.045	-1.155	-1.185	-1.155	-1.205	0.185	-0.185	-0.505	-1.795	-1.625	-1.555	-1.455	-1.455	-1.495	-0.89	-0.48	-0.45	-0.37	0.03	-0.02	-0.79	-0.48	-0.48	-0.38	-0.37	0.01	-0.605	-0.475	-0.145	-0.245	0.295	0.545	-0.863177
YLR409C	UTP21	ribosome biogenesis and assembly*	snoRNA binding	0	-3.04	-2.34	-1.6	-1.42	-1.05	-1.79	-2.33	-1.89	-0.04	-4.52	-2.86	-1.88	-1.63	-1.63	-1.7	-1.73	-1.64	0.47	5.55e-17	-0.04	-0.91	-0.74	-0.61	-0.44	-0.21	-0.6	-0.9	-0.7	-0.48	-0.43	-0.2	-0.15	-0.76	-0.53	-0.6	-0.73	-0.37	-0.08	0.23	0.68	0.63	0.53	0.77	0.61	-0.01
YLR413W	YLR413W	biological_process	molecular_function	0	-1.48	-1.87	-2.06	-1.06	-0.76	-0.67	-1.98	-0.47	-0.43	-1.93	-1.4	-1.54	-0.84	-1.19	-1.06	-1.46	-1.71	-0.585	-0.585	-0.395	-1.895	-2.425	-2.745	-2.575	-3.215	-2.595	-1.46	-1.29	-1.61	-1.42	-0.33	-0.1	-2.34	-2.07	-1.96	-2.14	-1.13	-0.42	-1.53	-1.79	-1.66	-1.48	-1.26	-0.61	-0.74
YLR435W	TSR2	ribosome biogenesis and assembly*	molecular_function	0	-2.85	-2.17	-1.47	-1.89	-1.56	-1.79	-2.17	-1.45	-0.005	-4.385	-3.005	-2.505	-2.475	-2.275	-2.025	-1.905	-1.905	0.425	0.045	-0.235	-1.265	-1.755	-1.825	-1.785	-1.885	-2.085	-0.48	-0.3	-0.27	-0.37	-0.02	0.17	-1.91	-1.19	0.04	0.15	0.23	0.12	-0.63	-0.65	-0.42	-0.42	-0.13	0.07	-0.18
YLR449W	FPR4	ribosome biogenesis and assembly*	isomerase activity*	0	-2.18	-1.44	-1.16	-1.33	-1.25	-1.61	-2.1	-1.86	0.145	-4.155	-2.105	-1.545	-1.615	-1.495	-1.345	-1.345	-1.595	0.385	-0.065	-0.395	-1.755	-2.265	-2.245	-2.205	-2.155	-2.345	-0.49	-0.59	-0.09	0	0.04	0.34	-0.26	-0.53	-0.59	-0.44	0.05	0.28	-1.965	-1.735	-1.455	-1.535	-1.065	-0.995	-0.0951061
YML022W	APT1	nucleoside metabolic process*	transferase activity*	0	-1.68	-1.53	-1.02	-1.34	-1.41	-1.93	-1.94	-2.11	-0.11	-2.82	-2.51	-1.92	-2.02	-2.04	-1.98	-1.79	-1.8	0.16	-0.04	-0.37	-1.49	-1.99	-2	-2.22	-2.09	-2.27	-0.31	-0.21	-0.22	0.18	0	-0.27	-0.98	-0.16	-0.01	-0.37	-0.27	-0.26	-1.49	-1.31	-1.2	-0.96	-1.01	-0.67	-0.46026
YML043C	RRN11	transcription*	RNA polymerase I transcription factor activity	0	-2.66	-1.61	-1.35	-1.75	-1.51	-1.52	-1.54	-1.04	-0.14	-3.79	-2.32	-1.96	-1.36	-1.1	-1.15	-1.24	-1.24	-0.01	-0.7	-0.62	-1.5	-1.53	-1.52	-1.47	-1.19	-1.6	-1.18	-0.82	-0.92	-0.84	-0.5	-0.36	-1.37	-0.75	-0.22	-0.19	-0.18	-0.49	-1.025	-0.635	-0.225	-0.165	0.005	0.055	-0.328202
YML080W	DUS1	metabolic process*	catalytic activity*	0	-2.66	-1.65	-1.03	-1.52	-1.44	-1.99	-2.2	-1.53	0.015	-2.795	-1.815	-1.395	-1.405	-1.285	-1.325	-1.275	-1.185	0.31	-0.19	-0.19	-0.01	-0.11	-0.09	-0.02	-0.08	-0.25	-0.29	-0.47	-0.36	-0.41	0.03	0.11	-0.32	-0.24	-0.46	-0.22	-0.09	0.11	0.885	0.815	0.485	0.415	0.225	0.245	-0.41
YML093W	UTP14	ribosome biogenesis and assembly*	nucleotide binding*	0	-2.94	-1.87	-1.18	-0.97	-0.55	-1.27	-1.24	-0.9	0.135	-4.815	-3.105	-1.995	-1.985	-2.105	-2.215	-2.085	-1.965	0.56	-0.03	-0.29	-1.3	-1.36	-1.44	-1.3	-1.29	-1.6	-1.06	-1.07	-0.32	-0.42	-0.27	-0.05	-1.52	-1.21	-0.69	-0.13	0.14	0.14	-0.765	-0.715	-0.415	-0.525	-0.165	-0.205	0.11
YML096W	YML096W	biological_process*	molecular_function*	0	-2.28	-1.27	-0.94	-1.25	-0.99	-1.33	-1.46	-1.23	0.08	-2.07	-1.65	-1.6	-1.9	-1.59	-1.33	-1.31	-1.1	0.165	-0.255	-0.295	-1.355	-1.715	-2.055	-2.075	-1.905	-1.735	-0.35	-0.21	-0.43	-0.42	0.03	0.04	-1.08	-0.6	0.13	-0.19	0.21	0.27	-0.365	-0.045	0.165	0.405	0.595	0.915	-0.451409
YML108W	YML108W	biological_process	molecular_function	0	-2.59	-1.77	-1.32	-1.09	-1.41	-1.63	-1.84	-2.18	-0.155	-2.275	-1.665	-1.125	-1.435	-1.585	-1.885	-1.965	-2.365	0.56	0.07	-0.16	-0.67	-1.06	-1.11	-1.24	-1.4	-1.42	-0.33	0.01	-0.48	-0.68	-0.17	0.03	-1.92	-1.36	-0.08	-0.04	0.18	0.06	-0.155	-0.415	-0.005	0.205	0.265	0.555	-0.39
YML116W	ATR1	transport*	transporter activity*	0	-3.06	-2.63	-2.05	-0.96	-0.54	-0.24	-0.03	-0.18	-0.55	-2.59	-2.4	-1.4	-1.15	-1.24	-1.53	-1.49	-1.52	-0.445	-0.725	-1.615	-2.175	-0.995	-1.325	-1.645	-1.855	-2.275	-0.23	-0.08	-1.18	-1.35	-0.86	-0.54	-2.24	-1.97	-1.38	-1.45	-1.02	-0.72	-1.775	-1.905	-1.745	-1.545	-0.995	-0.495	9.03346e-05
YML125C	PGA3	electron transport*	molecular_function*	0	-1.79	-2.03	-1.97	-2.18	-1.94	-2.12	-2.23	-2.33	-0.655	-2.625	-2.295	-2.165	-0.825	-0.815	-0.855	-0.905	-1.295	-0.705	-1.015	-0.815	-1.725	-1.345	-1.035	-1.085	-1.205	-1.165	-0.8	-0.66	-0.89	-0.86	-0.53	-0.13	-1.29	-1.36	-1.08	-1	-0.45	-0.1	-0.615	-0.755	-0.705	-0.505	-0.255	-0.155	0.227201
YMR014W	BUD22	ribosome biogenesis and assembly*	molecular_function	0	-2.4	-1.77	-1.03	-0.82	-0.71	-0.74	-0.64	-0.16	0.155	-3.655	-2.255	-1.175	-0.785	-1.015	-1.165	-1.025	-0.925	0.68	0.05	0.05	-0.7	-0.55	-0.44	-0.32	-0.11	-0.65	-0.28	-0.61	-0.49	-0.53	-0.17	-0.11	-0.08	0.23	0.23	0.39	0.08	0.04	0.06	-0.03	0.09	-0.22	0	0.02	-0.09
YMR049C	ERB1	rRNA processing	molecular_function	0	-3.63	-2.54	-1.68	-1.51	-1.06	-1.98	-2.15	-1.63	-0.065	-4.725	-3.235	-2.285	-2.085	-2.185	-2.135	-2.175	-2.065	0.29	-0.39	-0.52	-1.5	-1.53	-1.52	-1.41	-1.58	-1.45	-0.99	-0.92	-0.49	-0.43	-0.11	-0.05	-0.93	-1.05	-1.09	-0.95	-0.31	0.09	-1.26	-1.11	-1.1	-1.07	-0.78	-0.77	0.0818488
YMR120C	ADE17	purine nucleotide biosynthetic process*	transferase activity*	0	-3.3	-2.04	-1.55	-2.45	-2.32	-2.61	-3.01	-3.59	0.305	-2.765	-2.055	-1.695	-2.025	-1.985	-2.195	-2.265	-2.845	0.27	0.15	-0.31	-1.19	-0.96	-0.97	-0.93	-0.9	-1.19	-0.88	-0.67	-0.71	-0.31	-0.13	-0.01	-0.27	-0.17	-0.71	-0.91	-0.73	-0.18	-0.47	-0.48	-0.29	-0.27	0.14	0.23	-0.474489
YMR128W	ECM16	ribosome biogenesis and assembly*	nucleotide binding*	0	-3.35	-1.81	-0.9	-0.63	-0.12	-0.77	-0.76	-0.76	-0.11	-4.7	-1.93	-1.01	-0.6	-0.49	-0.52	-0.55	-0.38	0.335	-0.485	-0.585	-0.665	-0.225	0.015	0.125	0.175	0.285	-0.12	-0.27	0.05	-0.12	0.09	0.1	0.16	-0.09	-0.48	-0.36	0.01	0.09	-0.23	-0.26	-0.41	-0.46	-0.44	-0.54	0.24
YMR229C	RRP5	ribosome biogenesis and assembly*	RNA binding*	0	-3.27	-2.18	-1.56	-1.32	-0.85	-1.58	-2.1	-1.74	0.06	-4.7	-2.83	-1.74	-1.81	-1.61	-1.6	-1.47	-1.33	0.63	0.27	-0.22	-1.1	-0.89	-0.98	-0.79	-0.77	-0.77	-0.55	-0.75	-0.17	-0.21	0.01	0.02	-0.7	-0.82	-0.51	-0.34	0.02	0.1	-0.06	2.78e-17	0.1	-0.04	0.19	0.19	0.13
YMR239C	RNT1	ribosome biogenesis and assembly*	hydrolase activity*	0	-2.63	-1.96	-1.06	-0.37	-0.13	-0.46	-0.37	0.01	-0.11	-3.34	-1.67	-0.38	-0.36	-0.31	-0.46	-0.24	-0.11	0.08	-0.71	-0.95	-0.99	-0.36	-0.7	-0.74	-0.74	-0.76	-0.26	-0.31	-0.4	-0.41	-0.19	0.15	-0.59	-0.18	-0.14	0.4	0.21	-0.03	-1.235	-1.095	-1.025	-1.075	-0.795	-0.895	0.05
YMR243C	ZRC1	transport*	zinc ion binding*	0	-1.63	-1.49	-1.28	-1.28	-1.37	-1.48	-1.35	-1.25	-0.555	-2.425	-1.425	-1.115	-1.525	-1.765	-1.805	-1.895	-2.075	-0.66	-1.03	-1.37	-1.76	-1.85	-2.39	-2.46	-2.53	-2.38	-1.12	-0.85	-0.52	-0.23	-0.35	-0.21	-1.22	-0.91	-1.17	-0.81	-0.6	-0.25	-2.185	-2.045	-1.855	-1.485	-1.335	-1.285	-0.121042
YMR300C	ADE4	metabolic process*	transferase activity*	0	-2.8	-2.14	-1.53	-1.84	-1.27	-1.49	-1.81	-1.63	0.205	-2.785	-2.365	-1.805	-1.885	-1.615	-1.565	-1.755	-1.815	0.21	0.17	-0.54	-1.48	-0.93	-1.04	-0.87	-0.75	-0.88	-0.06	-0.04	-0.33	-0.37	-0.22	0.05	-0.28	-0.26	-0.05	-0.12	-0.09	-0.17	-0.44	-0.16	-0.02	-0.01	0.35	0.42	-0.445288
YMR308C	PSE1	transport*	binding*	0	-1.11	-1.09	-1.06	-1.18	-0.97	-1.56	-1.64	-1.76	0.03	-2.15	-1.63	-1.47	-1.75	-1.85	-1.91	-1.95	-1.9	0.08	-0.06	-0.23	-1.14	-1.15	-1.28	-1.34	-1.44	-1.27	-0.73	-0.67	-0.33	-0.16	0	0.04	-0.65	-0.7	-0.3	-0.35	-0.19	0.18	-0.525	-0.405	-0.225	-0.035	-0.015	0.085	-0.19328
YNL002C	RLP7	translation*	RNA binding*	0	-2.99	-1.93	-1.25	-1.39	-1.04	-1.22	-1.47	-1.02	0	-4.4	-2.3	-1.45	-1.75	-1.64	-1.64	-1.73	-1.83	0.1	-0.4	-0.68	-1.09	-1.4	-1.8	-1.75	-1.61	-1.82	-0.39	-0.07	-0.15	-0.26	-0.13	0.12	-0.63	-0.2	0.64	0.52	0.29	-0.05	-0.39	-0.26	-0.47	-0.52	-0.4	-0.76	0.03
YNL029C	KTR5	cell wall organization and biogenesis*	transferase activity*	0	-1.06	-0.94	-0.87	-1.66	-1.79	-2.03	-2.08	-1.85	-0.57	-1.81	-2.04	-1.94	-2.42	-2.02	-2.01	-1.85	-1.78	-0.39	-0.92	-0.85	-1.34	-1.44	-1.63	-1.64	-1.56	-1.55	-1.57	-1.05	-0.93	-0.81	-0.62	-0.62	-1.5	-1.61	-1.34	-1.56	-1.17	-1.01	-0.86	-0.6	-0.55	-0.21	-0.16	-0.33	-0.39
YNL061W	NOP2	ribosome biogenesis and assembly*	transferase activity*	0	-3.13	-1.79	-1.2	-0.88	-0.55	-1.19	-1.25	-1.3	0.035	-5.485	-3.065	-1.895	-2.375	-2.435	-2.515	-2.415	-2.455	0.355	-0.125	-0.415	-0.895	-1.055	-1.335	-1.195	-1.055	-1.035	-0.18	-0.29	0.12	0.01	0.18	0.1	0.01	0.11	-0.09	-0.32	-0.01	0.04	-0.35	-0.21	-0.34	-0.5	-0.31	-0.3	0.106458
YNL075W	IMP4	ribosome biogenesis and assembly*	rRNA primary transcript binding*	0	-2.7	-2	-1.26	-1.33	-0.98	-1.21	-1.17	-0.72	-0.045	-4.325	-2.425	-1.475	-1.595	-1.305	-1.305	-1.255	-1.065	0.175	-0.345	-0.535	-0.895	-0.725	-0.835	-0.585	-0.785	-0.725	-0.28	-0.27	-0.31	-0.44	-0.04	0.27	-1.06	-0.7	-0.1	0.05	0.09	0.1	-0.275	-0.255	-0.215	-0.185	0.085	-0.005	0.0151807
YNL110C	NOP15	ribosome biogenesis and assembly*	molecular_function*	0	-2.98	-1.96	-1.07	-0.99	-0.79	-1.42	-1.79	-1.25	0	-5	-2.17	-1.35	-1.47	-1.38	-1.64	-1.56	-1.81	0.4	-0.23	-0.46	-0.6	-0.42	-0.44	-0.54	-0.67	-0.86	-0.42	0.12	-0.25	-0.62	-0.29	0.21	-1.38	-1.05	0.22	0.19	0.36	-0.1	-0.035	-0.055	0.015	-0.125	-0.055	-0.535	0.117015
YNL112W	DBP2	rRNA processing*	nucleotide binding*	0	-4.23	-4.5	-2.78	-2.61	-2.05	-2.77	-3.13	-2.6	0.055	-4.395	-3.915	-3.835	-2.995	-2.645	-2.705	-2.805	-2.305	0.27	-0.61	-0.83	-1.71	-0.95	-1.17	-1.3	-1.54	-1.48	-0.64	-0.62	-0.26	-0.23	0.04	0.23	-0.13	-0.3	-0.76	-0.72	-0.27	0.41	-1.24	-0.92	-0.97	-1.02	-0.39	-0.45	-0.00507146
YNL112W	DBP2	rRNA processing*	nucleotide binding*	0	-4.23	-4.5	-2.78	-2.61	-2.05	-2.77	-3.13	-2.6	0.055	-4.395	-3.915	-3.835	-2.995	-2.645	-2.705	-2.805	-2.305	0.27	-0.61	-0.83	-1.71	-0.95	-1.17	-1.3	-1.54	-1.48	-0.64	-0.62	-0.26	-0.23	0.04	0.23	-0.13	-0.3	-0.76	-0.72	-0.27	0.41	-1.24	-0.92	-0.97	-1.02	-0.39	-0.45	-0.00507146
YNL113W	RPC19	transcription*	transferase activity*	0	-2.55	-1.8	-0.96	-1.51	-1.37	-1.95	-2.53	-2.26	0.005	-3.945	-2.295	-1.735	-2.185	-2.095	-2.135	-2.135	-2.055	0.345	-0.315	-0.435	-0.835	-0.275	0.085	0.055	-0.135	-0.605	-0.43	0.01	-0.23	-0.41	-0.33	-0.1	-1.82	-1.12	0	-0.03	0.19	-0.28	-0.69	-0.59	-0.25	-0.3	-0.17	-0.15	0.04
YNL119W	NCS2	ribosome biogenesis and assembly*	molecular_function	0	-2.22	-1.19	-0.67	-0.25	-0.09	-0.2	-0.15	-0.2	0.015	-4.265	-2.025	-0.905	-0.805	-0.835	-0.955	-1.015	-0.975	0.28	-0.43	-0.78	-1.27	-0.74	-0.7	-0.65	-0.63	-0.63	-0.28	0.05	-0.18	-0.28	-0.03	0.06	-1.29	-0.56	0.23	0.16	0.13	-0.09	-0.815	-0.745	-0.445	-0.235	-0.405	-0.515	0.17
YNL132W	KRE33	ribosome biogenesis and assembly	molecular_function*	0	-3.89	-2.62	-1.8	-1.73	-1.38	-2.01	-2.29	-2.1	0.015	-5.665	-3.615	-2.325	-2.395	-2.485	-2.565	-2.525	-2.485	0.48	-0.11	-0.37	-1.56	-1.46	-1.65	-1.45	-1.33	-1.39	-0.81	-0.83	-0.43	-0.25	0	0.04	-0.56	-0.43	-0.6	-0.54	-0.09	0.11	-0.4	-0.12	-0.13	-0.07	0.16	0.39	0.15
YNL151C	RPC31	transcription*	transferase activity*	0	-2.24	-1.45	-0.78	-1.08	-1.08	-1.39	-1.59	-1.05	0.05	-3.75	-2.35	-1.78	-2.07	-2.05	-2.09	-1.98	-1.92	0.275	-0.225	-0.635	-1.675	-1.675	-1.845	-1.745	-1.745	-1.795	-0.72	-0.51	-0.32	-0.41	-0.01	0.23	-0.9	-0.92	-0.68	-0.67	-0.2	-0.05	-1.47	-1.13	-0.76	-0.51	-0.15	-0.46	-0.23
YNL175C	NOP13	ribosome biogenesis and assembly	nucleotide binding*	0	-3.77	-2.67	-1.56	-1.47	-1.09	-1.76	-1.9	-1.85	-0.075	-5.695	-4.115	-2.815	-2.715	-2.475	-2.245	-2.085	-1.965	0.33	-0.25	-0.63	-2.07	-2.03	-1.74	-1.74	-1.74	-2.03	-0.74	-0.74	-0.34	-0.4	-0.04	0.21	-1.78	-1.11	-0.73	-0.24	-0.11	-0.04	-1.755	-1.475	-1.275	-1.225	-0.855	-0.755	-0.100323
YNL182C	IPI3	ribosome biogenesis and assembly*	molecular_function	0	-3.3	-2.35	-1.63	-2	-1.83	-2.42	-2.69	-2.06	0.075	-3.975	-2.665	-1.765	-2.195	-2.495	-2.405	-2.225	-2.185	0.25	-0.48	-0.52	-1.44	-1.77	-1.56	-1.41	-1.3	-1.88	-0.66	-0.76	-0.39	-0.43	-0.11	0.05	-1.11	-0.77	-0.23	-0.3	0.08	0.13	-0.27	-0.2	-0.21	-0.06	0.03	0.19	-0.13
YNL207W	RIO2	maturation of SSU-rRNA from tricistronic rRNA transcript (SSU-rRNA, 5.8S rRNA, LSU-rRNA)	nucleotide binding*	0	-2	-1.41	-0.8	-1.05	-1.1	-1.71	-2.04	-1.74	0.04	-2.6	-1.54	-1.1	-1.33	-1.2	-1.14	-1.14	-1.24	0.265	-0.245	-0.395	-0.615	-0.695	-0.855	-0.815	-0.615	-0.865	0	-0.14	-0.25	-0.27	-0.05	0.15	-0.4	-0.32	-0.16	-0.27	-0.09	-0.06	0.135	0.175	0.165	0.095	0.255	0.525	-0.11
YNL209W	SSB2	translation*	nucleotide binding*	0	-1.45	-0.65	-0.57	-1.01	-0.62	-1.3	-1.97	-2.33	-0.065	-3.265	-2.985	-1.945	-2.485	-2.505	-2.485	-2.495	-2.605	-0.025	-0.035	-0.145	-1.595	-1.925	-2.315	-2.175	-1.785	-1.965	-1.07	-1.17	-0.35	0.2	-0.21	-0.33	-0.34	-0.37	-0.78	-0.92	-0.36	-0.13	-1.595	-1.135	-1.115	-1.125	-0.475	-0.875	-0.317035
YNL255C	GIS2	intracellular signaling cascade	molecular_function*	0	-1.38	-0.86	-0.57	-0.47	-0.42	-0.86	-1.23	-1.35	0.015	-2.885	-1.805	-1.165	-1.415	-1.485	-1.475	-1.425	-1.605	0.325	0.115	-0.115	-0.285	-0.595	-0.565	-0.605	-0.615	-0.675	-0.2	0.07	-0.05	-0.16	-0.01	-0.12	-1.29	-1.36	-0.25	-0.07	-0.04	-0.28	0.25	0.23	0.3	0.17	0.13	0.05	-0.462546
YNL313C	YNL313C	karyogamy during conjugation with cellular fusion	molecular_function	0	-2.37	-1.58	-0.96	-1.33	-1.03	-1.59	-1.74	-1.45	3.47e-18	-3.3	-1.94	-1.4	-0.83	-0.72	-0.75	-0.81	-0.84	0.325	-0.265	-0.315	-1.025	-0.805	-0.625	-0.485	-0.455	-0.575	-0.24	-0.36	-0.38	-0.3	-0.1	0.14	-0.11	-0.36	-0.65	-0.7	-0.52	0.01	0.415	0.695	0.575	0.585	0.905	0.965	0.01
YNR015W	SMM1	metabolic process*	catalytic activity*	0	-2.21	-1.61	-1.12	-1.12	-0.72	-0.49	-0.21	0.05	-0.135	-2.485	-1.545	-1.355	-1.125	-0.855	-0.745	-0.745	-0.765	0.23	-0.39	-0.63	-1.49	-1.59	-1.6	-1.52	-1.46	-1.05	-0.3	-0.52	-0.55	-0.58	-0.3	-0.12	-0.92	-1.04	-1.4	-1.26	-0.8	-0.48	-0.405	-0.235	-0.055	-0.075	0.265	0.595	-0.565813
YNR038W	DBP6	ribosome biogenesis and assembly*	nucleotide binding*	0	-1.94	-1.56	-1.19	-1.19	-1.16	-1.87	-1.94	-2.07	-0.04	-2.96	-1.91	-1.42	-1.83	-2.02	-2.08	-2.05	-2.17	0.19	-0.48	-0.53	-1.12	-1.33	-1.34	-1.34	-1.37	-1.47	-0.4	-0.46	-0.05	0.14	0.04	0.19	-0.16	-0.1	-0.08	-0.25	-0.14	0.35	0.02	0.02	0.05	0.08	0.24	0.67	-0.0498931
YNR053C	NOG2	ribosome biogenesis and assembly*	nucleotide binding*	0	-3.05	-2.37	-1.46	-1.09	-0.99	-1.35	-1.91	-1.44	-0.08	-3.87	-2.75	-1.28	-1.58	-1.78	-1.82	-1.75	-1.51	0.12	-0.36	-0.5	-0.92	-0.63	-1.16	-1.04	-0.88	-0.96	-0.35	-0.63	-0.24	-0.25	-0.26	-0.04	-0.23	-0.24	-0.32	-0.2	-0.07	-0.02	0.24	0.59	0.53	0.35	0.74	0.58	0.0606719
YNR053C	NOG2	ribosome biogenesis and assembly*	nucleotide binding*	0	-3.05	-2.37	-1.46	-1.09	-0.99	-1.35	-1.91	-1.44	-0.08	-3.87	-2.75	-1.28	-1.58	-1.78	-1.82	-1.75	-1.51	0.12	-0.36	-0.5	-0.92	-0.63	-1.16	-1.04	-0.88	-0.96	-0.35	-0.63	-0.24	-0.25	-0.26	-0.04	-0.23	-0.24	-0.32	-0.2	-0.07	-0.02	0.24	0.59	0.53	0.35	0.74	0.58	0.0606719
YNR054C	ESF2	ribosome biogenesis and assembly*	RNA binding*	0	-2.17	-1.4	-0.98	-0.87	-0.69	-0.76	-1.05	-0.6	-0.03	-3.63	-1.74	-1	-1	-0.9	-0.85	-0.85	-1.03	0.205	-0.335	-0.475	-0.985	-1.005	-1.115	-0.915	-0.955	-0.755	-0.17	-0.27	0.08	-0.03	-0.09	0.14	-0.89	-0.64	-0.26	0.15	0.27	0.09	-1.14	-0.98	-0.81	-0.78	-0.66	-1.05	-0.04
YOL010W	RCL1	ribosome biogenesis and assembly*	molecular_function*	0	-2.57	-1.72	-1.19	-1.21	-1.23	-1.57	-2.17	-1.12	0.105	-4.765	-3.275	-1.875	-2.185	-2.565	-2.665	-2.545	-2.385	0.4	-0.33	-0.62	-1.63	-1.36	-1.78	-1.55	-1.49	-1.63	-1.29	-0.97	-0.73	-0.58	-0.2	-0.06	-2.13	-1.8	-0.95	-0.71	-0.32	-0.24	-0.305	-0.335	0.055	0.105	0.295	0.575	-0.313711
YOL041C	NOP12	rRNA processing*	nucleotide binding*	0	-2.23	-1.87	-1.13	-1.29	-1.14	-1.55	-1.95	-1.39	0.015	-3.615	-1.875	-1.145	-1.135	-1.145	-1.115	-1.015	-1.145	0.3	-0.11	-0.27	-1.09	-1.12	-1.17	-1.11	-0.97	-1.15	-0.38	-0.44	-0.16	-0.34	-0.35	-0.2	-0.65	-0.29	0.41	0.36	0.2	-0.19	0.33	0.23	0.21	0.15	0.17	0.08	0.2
YOL092W	YOL092W	biological_process	molecular_function	0	-1.94	-1.67	-1.17	-1.14	-1.22	-1.8	-2.21	-2.38	-0.505	-2.035	-1.635	-1.525	-1.935	-2.035	-2.085	-2.095	-2.305	-0.415	-0.565	-0.875	-1.255	-1.385	-1.615	-1.565	-1.945	-1.755	-0.29	-0.3	-0.54	-0.47	-0.5	-0.38	-0.27	0.11	-0.36	-0.2	-0.36	-0.32	-1.565	-1.535	-1.525	-1.115	-1.245	-0.835	0.16
YOL125W	TRM13	tRNA methylation	tRNA methyltransferase activity	0	-2.89	-1.54	0.46	-1.19	-0.37	-1.09	-1	-0.17	-0.095	-3.965	-2.225	-1.005	-1.185	-0.855	-0.885	-0.975	-0.735	0.185	-0.555	-1.115	-1.655	-2.235	-3.245	-3.035	-2.835	-3.115	-0.08	0.1	0.1	-0.03	-0.05	0.08	-0.54	-0.75	-0.66	-0.62	-0.58	-0.43	-1.18	-0.88	-0.88	-0.91	-0.86	-0.69	-0.0606004
YOL144W	NOP8	ribosome biogenesis and assembly*	molecular_function*	0	-2.24	-1.56	-1.13	-1.05	-0.95	-1.51	-1.94	-1.63	-0.045	-3.405	-1.955	-1.015	-0.865	-0.685	-0.575	-0.575	-0.555	0.195	-0.515	-0.685	-0.905	-0.565	-0.385	-0.075	0.065	-0.075	-0.57	-0.67	-0.4	-0.52	-0.27	0.11	-0.15	-0.11	-0.14	-0.27	0.05	-0.07	-0.285	-0.015	0.045	0.005	0.185	-0.005	0.170287
YOR004W	UTP23	ribosome biogenesis and assembly*	molecular_function*	0	-4.72	-3.15	-2.16	-2.14	-1.86	-2.09	-1.96	-1.52	-0.24	-4.32	-2.56	-1.78	-1.63	-1.55	-1.49	-1.4	-1.24	0.33	-0.49	-0.67	-1.43	-1.46	-1.54	-1.36	-1.34	-1.42	-1.12	-1	-1.04	-1.01	-0.33	0.18	-1.78	-1.57	-0.64	-0.39	0.02	-0.05	0.79	0.87	1.06	1.17	1.26	1.39	-0.191184
YOR021C	YOR021C	ribosome biogenesis and assembly	molecular_function	0	-1.93	-1.09	-1.1	-1.48	-1.22	-1.08	-1.13	-0.67	-0.195	-2.585	-1.675	-1.585	-2.375	-2.005	-2.065	-1.715	-1.835	-0.13	-0.38	-0.88	-1.08	-1.82	-2.21	-2	-2.26	-2.07	-0.52	-0.25	-0.06	-0.06	0.04	0.12	-1.41	-0.9	0.1	-0.04	0.05	-0.14	-0.03	-0.02	-0.14	0	-0.1	0.11	-0.87
YOR091W	TMA46	ribosome biogenesis and assembly	molecular_function*	0	-2.23	-1.69	-0.95	-1.66	-1.56	-2.38	-2.63	-2.38	0.04	-3.21	-2.18	-1.7	-1.73	-1.81	-1.82	-1.77	-1.79	0.375	-0.065	-0.215	-1.115	-1.565	-1.895	-1.925	-2.035	-2.155	-0.7	-0.84	-0.52	-0.49	-0.48	-0.24	-0.19	-0.54	-1.14	-1.15	-0.6	-0.3	-1.51	-1.12	-1.13	-1.29	-0.89	-1.03	-0.0913837
YOR101W	RAS1	small GTPase mediated signal transduction*	nucleotide binding*	0	-1.84	-2.1	-1.78	-0.58	-0.05	-0.71	-0.99	-1.25	0.175	-3.105	-1.395	-0.095	-0.725	-0.745	-1.075	-1.085	-1.265	0.345	0.035	-0.295	-0.795	-0.445	-0.645	-0.345	-0.645	-1.125	-0.97	-0.89	-0.94	-0.89	0.04	0.38	-0.63	-0.24	-0.02	-0.22	-0.09	0.22	0.365	0.465	0.515	0.685	1.095	0.955	-0.234243
YOR145C	PNO1	ribosome biogenesis and assembly*	RNA binding*	0	-3.07	-1.94	-1.32	-1.19	-0.66	-0.88	-1.03	-0.33	-0.02	-3.6	-1.61	-0.9	-1	-0.75	-0.76	-0.89	-0.83	0.22	-0.56	-0.7	-0.64	-0.46	-0.49	-0.45	-0.54	-0.54	-0.18	-0.17	-0.34	-0.59	-0.3	0.04	-0.17	-0.21	0.12	-0.01	0.07	-0.08	-0.235	-0.215	-0.255	-0.375	-0.375	-0.625	-0.138355
YOR210W	RPB10	transcription*	transferase activity*	0	-1.69	-1.64	-1.43	-2.17	-2.03	-1.99	-1.9	-1.3	-0.02	-1.64	-1.78	-1.98	-2.52	-2.65	-2.45	-2.24	-2.16	0.395	0.065	-0.045	-0.775	-1.525	-1.315	-1.445	-1.545	-1.115	-1.09	-0.55	-0.57	-0.58	-0.14	-0.08	-2.11	-1.04	0.38	0.35	0.39	0.06	0.33	0.25	0.7	0.9	0.77	1.11	-0.638759
YOR243C	PUS7	ribosome biogenesis and assembly*	isomerase activity*	0	-2.21	-1.89	-1.74	-1.93	-1.61	-2.13	-2.43	-2.3	0.01	-3.39	-2.58	-2.04	-2.33	-2.36	-2.59	-2.44	-2.66	0.41	0.05	-0.27	-1.07	-1.27	-1.52	-1.57	-1.52	-1.54	-1.17	-1.04	-0.71	-0.69	-0.34	-0.05	-1.04	-1.06	-0.95	-0.77	-0.4	-0.13	-0.635	-0.405	-0.185	-0.015	0.245	0.305	-0.02
YOR252W	TMA16	biological_process	molecular_function	0	-2.69	-1.89	-1.18	-1.44	-1.19	-1.65	-1.77	-0.99	-0.115	-2.575	-2.135	-1.325	-1.415	-1.405	-1.475	-1.445	-1.615	0.41	-0.28	-0.72	-0.79	-0.46	-0.52	-0.32	-0.56	-0.52	-0.47	-0.3	-0.43	-0.77	-0.28	0.04	-1.5	-0.9	0.1	-0.06	0.04	-0.24	0.455	0.225	0.285	0.325	0.395	0.365	0
YOR294W	RRS1	ribosome biogenesis and assembly*	molecular_function	0	-3.51	-2.24	-1.13	-0.58	-0.44	-0.74	-1.12	-0.61	-0.07	-5.74	-2.62	-0.95	-0.88	-0.96	-1.02	-1.06	-1.41	0.275	-0.475	-0.585	-1.205	-0.715	-0.875	-0.825	-0.935	-0.865	-0.13	-0.32	-0.21	-0.31	0.03	0.35	-0.41	-0.51	-0.81	-0.33	-0.32	0.1	0.375	0.445	0.415	0.475	0.835	0.725	0.12
YOR306C	MCH5	transport*	transporter activity*	0	-2.17	-2.81	-2.36	-1.82	-1.38	-1.15	-0.93	-0.92	-0.68	-1.81	-2.02	-2.11	-1.92	-1.68	-1.36	-1.24	-0.23	-1.07	-1.13	-1.5	-2.59	-0.22	1.63	1.83	1.99	1.86	0.89	0.12	-0.07	-0.03	0.06	0.31	0.12	0.25	0.02	-0.21	0.22	0.71	-2.3	-2.24	-2.31	-1.97	-1.51	-1.02	-0.328632
YOR341W	RPA190	transcription*	transferase activity*	0	-3.22	-2.09	-1.56	-1.36	-0.99	-1.61	-1.7	-1.69	0.13	-3.81	-2.43	-1.74	-1.84	-1.84	-2.01	-2.12	-2.12	0.645	0.165	-0.215	-1.155	-1.195	-1.575	-1.475	-1.455	-1.335	-0.69	-0.61	-0.37	-0.34	-0.11	-0.05	-0.39	-0.62	-0.44	-0.65	-0.32	0.1	-0.3	0.23	0.09	0.46	0.41	0.4	0.0571508
YOR359W	VTS1	transport*	nucleotide binding*	0	-1.87	-1.66	-1.22	-1.02	-1.17	-1.85	-1.64	-2.04	-0.11	-3.12	-2.04	-1.06	-1.01	-1.11	-1.3	-1.47	-1.5	0.06	-0.52	-0.81	-1.76	-1.48	-1.62	-1.56	-1.76	-1.99	-0.75	-0.88	-0.47	-0.11	-0.01	0.1	-0.86	-0.44	-0.36	-0.22	-0.26	0.31	-0.79	-0.98	-0.76	-0.51	-0.39	-0.19	0.0118039
YOR361C	PRT1	translation*	nucleotide binding*	0	-1.34	-1.16	-1.19	-1.64	-1.41	-1.95	-2.28	-2.25	0.025	-2.755	-1.915	-1.725	-2.355	-2.345	-2.425	-2.295	-2.625	0.115	-0.025	-0.305	-1.345	-1.735	-1.945	-1.925	-1.925	-2.025	-0.63	-0.63	-0.05	0.04	0.02	-0.03	-0.52	-0.48	-0.51	-0.4	-0.23	-0.01	-0.42	-0.22	-0.21	-0.22	-0.03	-0.02	-0.430891
YPL012W	RRP12	ribosome biogenesis and assembly*	molecular_function*	0	-3.78	-2.45	-1.44	-1.44	-0.81	-2.13	-2.73	-2.1	0.025	-5.175	-2.885	-1.595	-1.395	-1.435	-1.605	-1.685	-1.865	0.45	-0.29	-0.46	-0.95	-0.57	-0.73	-0.66	-0.83	-0.64	-0.39	-0.51	-0.22	-0.26	0.06	0.28	-0.49	-0.57	-0.5	-0.46	-0.14	0.14	0.425	0.535	0.465	0.645	0.505	0.625	0.15
YPL043W	NOP4	ribosome biogenesis and assembly*	nucleotide binding*	0	-3.33	-2.31	-1.32	-1.31	-1.08	-1.37	-1.74	-0.85	0.02	-5.23	-2.92	-1.64	-1.88	-1.93	-1.98	-1.94	-1.82	0.265	-0.215	-0.525	-1.255	-0.945	-1.165	-1.005	-1.045	-1.125	-0.77	-0.83	-0.12	-0.19	-0.03	0.13	-0.45	-0.69	-0.75	-0.72	-0.04	0.13	0.21	0.31	0.29	0.18	0.54	0.39	0.2
YPL086C	ELP3	transport*	transferase activity*	0	-2.28	-1.33	-1.12	-0.84	-0.44	-0.81	-0.97	-0.97	0.08	-3.95	-2.11	-1.43	-1.28	-1.07	-1.09	-1.03	-1.09	0.275	-0.185	-0.485	-1.235	-0.925	-1.005	-0.885	-0.875	-0.915	-0.75	-0.74	-0.35	-0.3	-0.01	0.04	-0.82	-0.73	-0.63	-0.21	-0.12	0.02	-0.29	-0.22	-0.11	-0.17	0.05	0.31	-0.26426
YPL093W	NOG1	ribosome biogenesis and assembly*	nucleotide binding*	0	-3.79	-2.75	-1.66	-1.57	-1.1	-2.07	-2.33	-1.87	0.025	-5.215	-3.585	-2.185	-2.375	-2.475	-2.695	-2.595	-2.865	0.315	-0.395	-0.635	-1.535	-1.725	-2.215	-2.165	-2.415	-2.455	-0.73	-0.68	-0.21	-0.21	-0.06	0.05	-0.6	-0.47	-0.65	-0.75	-0.38	0.03	-0.755	-0.505	-0.425	-0.365	-0.005	-0.045	0.06
YPL126W	NAN1	ribosome biogenesis and assembly*	snoRNA binding	0	-3.55	-2.21	-1.61	-2.08	-1.78	-2.59	-2.69	-2.35	-0.045	-4.375	-2.375	-1.655	-1.655	-1.815	-1.835	-2.055	-2.025	0.23	-0.51	-0.63	-1.44	-1.53	-1.45	-1.5	-1.6	-1.53	-1.02	-0.9	-0.55	-0.53	-0.18	-0.14	-1.11	-0.99	-0.45	-0.29	0.04	0.22	-0.83	-0.77	-0.66	-0.41	-0.42	-0.44	-0.03
YPL146C	NOP53	ribosome biogenesis and assembly*	rRNA binding	0	-2.26	-1.94	-1.28	-1.42	-1.25	-1.62	-1.73	-1.33	0.16	-3.15	-2.31	-1.35	-1.42	-1.62	-1.87	-1.59	-1.35	0.7	0.19	0	-0.59	-0.34	-0.07	0.09	0.19	-0.42	-0.49	-0.76	-0.65	-0.78	-0.34	0.06	-0.96	-0.5	0.01	0.38	0.24	0.02	-0.01	-0.15	0.13	-0.16	0.1	0.08	-0.250333
YPL160W	CDC60	translation*	nucleotide binding*	0	-1.47	-1.69	-1.33	-1.49	-1.31	-1.5	-1.74	-2.35	-0.02	-2.27	-2.15	-1.66	-1.45	-1.29	-1.33	-1.35	-0.96	0.255	0.055	-0.015	-1.415	-1.425	-1.415	-1.435	-1.195	-1.465	-0.14	-0.28	-0.29	-0.15	-0.22	-0.08	0.37	0.28	0.01	-0.26	-0.03	0.1	-0.7	-0.28	-0.32	-0.4	-0.08	-0.14	-0.06
YPL207W	TYW1	tRNA processing*	molecular_function*	0	-2.15	-1.15	-0.74	-1.19	-1.14	-1.29	-1.44	-1.44	-0.655	-2.325	-1.575	-0.995	-0.985	-1.115	-1.385	-1.425	-1.605	-0.35	-0.69	-1.05	-1.42	-1.28	-1.42	-1.15	-1.19	-1.36	-0.53	-0.55	-0.78	-0.6	-0.49	-0.61	-0.56	-0.73	-0.78	-0.9	-0.57	-0.63	-0.24	-0.09	0.05	0.04	-0.06	-0.13	-0.312934
YPL211W	NIP7	ribosome biogenesis and assembly*	molecular_function*	0	-3.57	-2.39	-1.51	-1.81	-1.22	-1.85	-2.37	-1.65	-0.175	-5.835	-3.305	-2.225	-2.355	-2.365	-2.435	-2.425	-2.605	0.395	-0.115	-0.335	-1.095	-1.475	-1.715	-1.745	-1.825	-1.755	-0.65	-0.11	-0.05	-0.04	0.14	0.32	-1.59	-0.94	0.34	0.18	0.23	0.17	-0.195	-0.115	0.145	0.405	0.205	0.255	-0.211789
YPL212C	PUS1	ribosome biogenesis and assembly*	zinc ion binding*	0	-2.19	-1.87	-1.36	-1.62	-1.33	-1.17	-1.45	-0.94	0.035	-3.515	-1.845	-0.935	-1.105	-0.835	-0.865	-0.835	-0.825	0.115	-0.145	-0.305	-0.845	-0.535	-0.635	-0.615	-0.705	-0.935	-0.14	-0.27	-0.29	-0.31	-0.18	0.05	-0.43	-0.38	-0.32	-0.22	0.07	0.17	-0.235	-0.365	-0.295	-0.345	-0.115	0.225	-0.138161
YPL217C	BMS1	rRNA processing*	nucleotide binding*	0	-2.54	-1.71	-1.3	-1.08	-0.52	-0.77	-0.89	0.07	0.03	-4.17	-2.02	-1.07	-1.17	-1.15	-1.26	-1.28	-1.07	0.3	-0.01	-0.35	-0.89	-0.56	-0.72	-0.48	-0.6	-0.33	-0.79	-0.64	0.03	0.01	0.01	0.18	0.15	-0.3	-0.6	-0.39	0.06	0.1	-0.5	-0.45	-0.48	-0.38	-0.22	-0.55	0.14
YPL226W	NEW1	transport*	nucleotide binding*	0	-2.01	-1.71	-1.42	-1	-0.72	-1.51	-1.64	-1.82	0.03	-3.66	-1.86	-0.9	-0.87	-0.99	-1.18	-1.16	-1.46	0.365	0.135	0.135	-0.335	-0.135	-0.215	-0.485	-0.125	-0.465	-0.44	-0.79	-0.24	-0.01	0.08	0.11	0.32	0.24	-0.37	-0.35	-0.26	0.49	-0.415	-0.345	-0.495	-0.315	-0.055	0.335	0.12
YPL239W	YAR1	response to oxidative stress*	molecular_function	0	-2.13	-1.57	-1.12	-0.9	-1.12	-1.52	-1.92	-1.7	0.04	-2.69	-1.61	-0.66	-0.19	-0.2	-0.32	-0.39	-0.48	0.335	-0.035	-0.295	-0.645	0.205	0.085	0.105	-0.055	-0.855	-0.09	0.02	-0.46	-0.38	-0.11	-0.09	-0.77	-0.68	-0.29	-0.23	0.01	-0.18	-0.02	-0.35	-0.33	-0.54	-0.32	-0.27	0.237147
YPL266W	DIM1	ribosome biogenesis and assembly*	transferase activity*	0	-3.01	-1.97	-1.34	-1.41	-0.99	-1.41	-1.51	-0.67	-0.02	-3.44	-2.37	-1.46	-1.31	-1.12	-1.08	-1.03	-1.02	0.28	-0.15	-0.34	-0.95	-1	-1.11	-0.78	-1.02	-1.25	-0.57	-0.71	-0.54	-0.55	-0.06	0.13	-1.04	-1.05	-0.44	-0.21	-0.1	-0.04	0.025	-0.085	-0.085	-0.135	0.085	0.205	-0.13
YPR010C	RPA135	transcription*	transferase activity*	0	-3.74	-2.72	-1.73	-1.87	-1.45	-2.46	-3.11	-2.76	0.055	-5.135	-3.435	-2.115	-2.325	-2.535	-2.555	-2.605	-2.735	0.455	-0.185	-0.475	-1.665	-1.625	-1.825	-1.785	-1.875	-1.915	-1.07	-0.89	-0.47	-0.33	-0.06	0.08	-0.93	-0.82	-1.03	-0.75	-0.52	0.14	-0.445	-0.325	-0.025	0.175	0.545	0.685	0.06
YPR041W	TIF5	translation*	nucleotide binding*	0	-0.89	-0.93	-1.27	-1.83	-1.51	-1.6	-1.6	-1.34	0.025	-2.525	-2.185	-2.135	-1.995	-1.905	-2.025	-2.065	-2.085	0.18	0.02	-0.1	-1.35	-1.76	-1.96	-2.27	-2.03	-2.27	-0.96	-0.79	-0.49	-0.12	0.22	0.38	-1.09	-0.64	-1.03	-0.58	-0.19	0.42	-1.06	-0.73	-0.39	-0.22	0.3	0.27	-0.572288
YPR110C	RPC40	transcription*	transferase activity*	0	-2.37	-1.95	-1.45	-1.73	-1.45	-1.93	-2.2	-1.94	-0.015	-4.635	-2.645	-2.065	-2.075	-2.135	-2.095	-2.175	-2.075	0.22	-0.28	-0.46	-1.32	-1.57	-1.62	-1.56	-1.72	-1.7	-0.49	-0.32	-0.35	-0.26	-0.03	0.16	-1.46	-1.15	-0.26	-0.08	0.06	0.19	-0.94	-0.91	-0.53	-0.37	-0.08	-0.01	-0.04
YPR112C	MRD1	rRNA processing	nucleotide binding*	0	-3.71	-2.16	-1.27	-0.94	-0.35	-0.99	-1.1	-0.73	0.045	-4.845	-2.275	-1.025	-1.345	-1.265	-1.345	-1.285	-1.435	0.255	-0.535	-0.725	-0.885	-1.135	-1.395	-1.235	-1.245	-1.185	-0.77	-0.63	-0.52	-0.62	-0.32	-0.26	-0.47	-0.4	-0.28	-0.13	-0.06	-0.25	-0.315	-0.205	-0.135	-0.165	0.065	-0.195	0.11
YPR137W	RRP9	rRNA processing*	snoRNA binding	0	-2.34	-1.94	-1.54	-1.46	-1.2	-1.27	-1.27	-0.96	0.04	-3.75	-2.73	-1.97	-1.78	-1.73	-1.8	-1.75	-1.54	0.235	-0.315	-0.575	-1.735	-1.525	-1.305	-1.095	-0.935	-1.005	-1.25	-1.18	-0.92	-0.79	-0.54	-0.35	-0.96	-0.95	-0.75	-0.83	-0.48	-0.37	-0.205	0.105	0.215	0.365	0.555	0.645	-0.268024
YPR143W	RRP15	ribosome biogenesis and assembly*	molecular_function	0	-1.99	-1.4	-0.87	-0.48	-0.17	-0.2	-0.44	0.06	-0.11	-3.19	-1.68	-1.3	-1.14	-1.27	-1.34	-1.29	-1.55	0.335	-0.215	-0.345	-0.415	-0.515	-0.465	-0.535	-0.805	-1.245	-0.38	-0.63	-0.59	-0.73	-0.53	-0.24	-0.76	-0.89	-0.27	0.04	0.01	-0.48	0.04	-0.1	0.18	0.07	0.09	-0.16	-0.23
YPR144C	NOC4	ribosome biogenesis and assembly*	snoRNA binding	0	-2.72	-1.83	-1.25	-1.07	-0.82	-1.33	-1.47	-1.04	-0.07	-4.81	-3.63	-2.21	-2.03	-2.14	-2.18	-2.1	-2.11	0.24	-0.53	-0.72	-1.5	-1.39	-1.51	-1.51	-1.7	-1.61	-1.05	-1.06	-0.55	-0.34	0.07	0.26	-1.59	-1.37	-1.29	-0.94	-0.52	0.22	-0.645	-0.595	-0.365	-0.135	-0.085	0.325	0.00889489
YPR163C	TIF3	translation*	nucleotide binding*	0	-1.78	-1.31	-1.1	-1.1	-0.71	-1.19	-1.51	-1.44	0.115	-2.775	-1.945	-1.455	-1.625	-1.465	-1.405	-1.205	-1.295	0.255	0.215	0.085	-0.675	-0.655	-0.785	-0.635	-0.455	-0.905	-0.39	-0.43	-0.25	-0.04	-0.09	-0.16	0.8	0.29	-0.65	-0.54	-0.41	-0.29	0.075	0.205	0.195	-0.095	0.365	0.105	-0.44
YPR187W	RPO26	transcription*	transferase activity*	0	-1.56	-1.12	-0.93	-1.46	-1.19	-1.8	-2.23	-2.18	0.005	-2.125	-1.545	-1.525	-2.025	-2.255	-2.165	-2.055	-2.305	0.235	0.015	-0.085	-0.595	-1.135	-1.495	-1.445	-1.115	-1.325	-0.69	-0.2	-0.24	-0.15	-0.05	-0.15	-0.69	-0.53	0.34	0.07	0.22	-0.13	0.075	0.125	0.375	0.385	0.265	0.425	-0.43
YPR190C	RPC82	transcription*	transferase activity*	0	-2.07	-1.13	-0.93	-1.12	-0.96	-1.24	-1.4	-1.2	-0.01	-3.37	-2.05	-1.56	-1.65	-1.54	-1.57	-1.68	-1.62	0.255	-0.455	-0.635	-1.295	-0.995	-0.995	-0.925	-0.735	-0.305	-1.09	-1	-0.89	-0.63	-0.37	-0.36	-0.81	-0.86	-0.86	-0.87	-0.46	-0.38	0.365	0.435	0.445	0.645	0.755	0.725	-0.416226
YAL003W	EFB1	translation*	translation elongation factor activity	0	-0.73	-0.33	-0.71	-0.61	-0.37	-0.92	-1.81	-2.47	0.065	-2.225	-1.645	-0.605	-0.965	-1.195	-1.365	-1.455	-1.775	0.14	0.35	0.5	-0.28	-0.31	-0.66	-0.24	-0.16	-0.38	-0.13	-0.28	-0.4	-0.29	-0.09	-0.07	-0.05	-0.26	-0.21	-0.28	-0.2	-0.21	0.78	0.52	0.48	0.19	0.32	0.3	0.149967
YAL003W	EFB1	translation*	translation elongation factor activity	0	-0.73	-0.33	-0.71	-0.61	-0.37	-0.92	-1.81	-2.47	0.065	-2.225	-1.645	-0.605	-0.965	-1.195	-1.365	-1.455	-1.775	0.14	0.35	0.5	-0.28	-0.31	-0.66	-0.24	-0.16	-0.38	-0.13	-0.28	-0.4	-0.29	-0.09	-0.07	-0.05	-0.26	-0.21	-0.28	-0.2	-0.21	0.78	0.52	0.48	0.19	0.32	0.3	0.149967
YAL022C	FUN26	transport*	nucleoside transmembrane transporter activity	0	-0.51	-0.19	-0.41	-0.98	-1.06	-1.22	-1.32	-1.48	-0.37	0.03	-0.21	-0.45	-0.8	-0.85	-0.85	-0.83	-1.36	-0.575	-0.455	-0.555	-0.635	-1.225	-1.545	-1.675	-1.735	-1.845	0.04	-0.27	-0.29	-0.07	-0.13	-0.1	0.73	0.79	-0.26	-0.27	-0.34	0.01	-1.685	-1.435	-1.515	-1.395	-1.295	-0.975	-1.16748
YAL029C	MYO4	intracellular mRNA localization*	nucleotide binding*	0	-0.63	-0.57	-0.67	-1.58	-1.82	-2.53	-2.73	-3.78	-0.005	-1.055	-0.755	-1.265	-1.975	-1.935	-1.965	-1.825	-1.755	0.23	0.08	-0.02	-0.56	-1.41	-1.43	-1.38	-1.22	-1.06	-0.65	-0.33	0.22	0.2	-0.02	-0.26	-0.46	-0.31	-0.09	-0.09	-0.03	-0.1	-1.67	-1.4	-1.19	-0.97	-0.66	-0.89	-0.335491
YAL033W	POP5	rRNA processing*	hydrolase activity*	0	-1.03	-1.05	-0.98	-1	-1.22	-1.09	-1.48	-1.29	0.005	0.515	0.155	-0.575	-0.995	-0.795	-0.625	-0.565	-0.905	0.315	0.265	0.065	-0.745	-1.595	-1.355	-1.365	-1.325	-1.015	-0.87	-0.56	-0.56	-0.34	-0.06	-0.12	-0.98	-0.41	0.44	0.51	0.56	0.34	0.525	0.485	0.665	0.885	0.835	1.325	-0.996121
YAL035W	FUN12	translation*	nucleotide binding*	0	-0.84	-0.55	-0.82	-0.85	-0.23	-0.3	-0.1	-0.12	0.045	-2.335	-1.695	-1.555	-1.275	-1.185	-1.245	-1.185	-1.355	0.33	0.02	-0.04	-0.67	-0.81	-0.78	-0.69	-0.6	-0.59	-0.27	-0.46	0.12	0.26	0.18	0.17	-0.13	-0.11	-0.46	-0.41	-0.21	0.03	-0.21	-0.2	-0.18	-0.27	0.09	0.21	-0.429673
YAL058W	CNE1	protein folding*	unfolded protein binding*	0	-0.47	-0.52	-0.74	-0.65	-0.8	-0.83	-0.76	-1.01	-0.485	-0.575	-0.725	-0.745	-0.325	-0.335	-0.295	-0.305	-0.625	-0.435	-0.715	-0.705	-0.535	-0.575	-0.565	-0.585	-0.635	-0.845	-0.72	-0.61	-0.92	-0.92	-0.49	-0.19	-0.97	-0.97	-1.11	-1.12	-0.77	-0.44	-0.645	-0.545	-0.615	-0.425	-0.445	-0.155	-0.241375
YAR002W	NUP60	transport*	structural constituent of nuclear pore	0	-0.69	-0.86	-1	-1.29	-1.37	-1.45	-1.3	-1.39	-0.15	-0.67	-0.44	-0.75	-1.08	-1	-0.95	-1.07	-1.17	0.02	-0.28	-0.22	-0.79	-1.33	-1.41	-1.25	-1.5	-1.28	-0.92	-1.12	-0.77	-0.43	-0.36	-0.45	-0.46	-0.46	-0.51	-0.79	-0.53	-0.19	-1.59	-1.39	-1.28	-1.32	-1.06	-0.84	-0.4
YBL014C	RRN6	transcription*	RNA polymerase I transcription factor activity	0	-1.15	-1.26	-0.89	-1.29	-1.46	-1.81	-1.94	-2.03	-0.09	-0.76	-0.74	-0.37	-0.4	-0.57	-0.74	-0.72	-0.85	0.135	-0.275	-0.445	-0.655	-0.405	-0.445	-0.385	-0.355	-0.345	-0.55	-0.47	-0.29	-0.37	-0.09	-0.23	-0.24	-0.25	-0.25	-0.1	-0.18	-0.18	-0.415	-0.435	-0.095	-0.235	-0.125	-0.085	0.42
YBL020W	RFT1	transport*	sugar:hydrogen ion symporter activity*	0	-1.77	-0.78	-0.67	-1.38	-1.34	-1.51	-1.43	-1.77	-0.395	-1.165	-1.435	-1.285	-1.705	-1.735	-1.685	-1.695	-1.615	-0.485	-0.915	-1.045	-1.395	-1.505	-1.635	-1.705	-1.735	-1.755	-0.72	-0.67	-0.68	-0.33	-0.21	-0.38	-0.85	-0.59	-0.21	-0.46	-0.44	-0.42	-1.595	-1.395	-1.305	-1.185	-1.325	-1.225	-0.527694
YBL055C	YBL055C	response to oxidative stress*	hydrolase activity*	0	-0.99	-0.89	-0.67	-1.13	-1.08	-1.2	-1.79	-0.86	-0.105	-1.475	-0.755	-0.965	-0.955	-1.095	-0.905	-0.915	-0.785	0.04	-0.4	-0.59	-0.49	-0.53	-0.36	-0.49	-0.73	-0.68	0.04	0.26	0.17	0.13	0.1	0.14	-0.75	-0.64	0.12	-0.02	0.13	0.01	0.245	0.225	0.325	0.365	0.235	0.155	-0.74
YBL057C	PTH2	translation*	hydrolase activity*	0	-0.78	-0.83	-0.54	-0.91	-0.96	-1.35	-1.98	-1.83	-0.31	-0.71	-0.36	-0.63	-0.41	-0.45	-0.39	-0.47	-0.75	-0.135	-0.145	-0.205	-0.555	-1.185	-1.105	-1.105	-1.265	-1.175	-0.25	-0.16	-0.49	-0.33	-0.01	0.09	-1.19	-1.04	-0.48	-0.34	-0.11	-0.12	-0.445	-0.395	-0.005	0.185	0.075	0.285	-0.984622
YBL061C	SKT5	response to osmotic stress*	binding*	0	-0.79	-1.04	-1.15	-1.69	-1.09	-1.25	-1.21	-0.75	-0.1	-0.75	-1.19	-1.46	-1.55	-1.25	-1.05	-1.08	-0.91	0.03	-0.02	-0.07	-0.42	-0.69	-0.57	-0.41	-0.48	-0.52	-0.83	-0.73	-0.5	-0.69	-0.25	-0.09	-0.33	-0.88	-0.74	-0.47	-0.15	-0.19	0.01	0.07	0.25	0.17	0.29	0.12	-0.727619
YBL082C	ALG3	protein amino acid glycosylation*	transferase activity*	0	-1.35	-0.86	-0.6	-1.12	-1.12	-1.36	-1.92	-1.45	-0.3	-0.73	-1.04	-1.24	-1.48	-1.38	-1.31	-1.2	-1.51	-0.47	-0.72	-0.95	-1.42	-1.93	-2.39	-2.55	-2.42	-2.63	-1	-0.47	-0.91	-0.64	-0.33	-0.47	-0.3	-0.2	-1.18	-0.96	-0.76	-0.07	-1.995	-1.505	-1.505	-1.035	-0.655	-0.435	-1.14591
YBL083C	YBL083C	biological_process	molecular_function	0	-1.47	-0.85	-0.48	-1.02	-0.93	-1.35	-1.77	-1.49	-0.325	-0.765	-1.025	-1.185	-1.275	-1.075	-0.965	-0.875	-1.185	-0.43	-0.67	-0.81	-1.2	-1.58	-1.84	-2.03	-2.03	-2.17	-0.72	-0.62	-0.78	-0.59	-0.26	-0.35	-0.46	-0.22	-1.19	-0.85	-0.71	-0.1	-1.465	-1.245	-1.495	-1.055	-0.735	-0.295	-0.92
YBL089W	AVT5	transport*	transporter activity*	0	0	-0.21	-0.51	-0.94	-1.1	-1.31	-1.17	-1.39	-0.265	0.705	0.065	-0.195	-0.405	-0.565	-0.595	-0.685	-0.935	-0.4	-0.42	-0.44	-0.62	-1.11	-1.23	-1.26	-1.29	-1.41	-0.45	-0.45	-0.59	-0.37	-0.27	-0.36	-0.15	0.18	0.01	-0.24	-0.13	-0.08	-0.775	-0.715	-0.625	-0.355	-0.495	-0.225	-0.94
YBR002C	RER2	metabolic process*	transferase activity*	0	-1.02	-1.07	-1.04	-0.89	-0.9	-0.82	-0.95	-0.85	-0.14	-1.5	-1.17	-0.88	-1.02	-0.86	-0.81	-0.72	-0.81	-0.065	-0.225	-0.325	-0.865	-0.875	-1.135	-1.085	-0.945	-1.115	-0.28	0.08	-0.16	-0.15	-0.24	-0.06	-0.1	0.14	0.64	0.08	0.03	-0.21	-0.385	-0.235	-0.265	-0.295	-0.105	-0.445	-0.73
YBR004C	GPI18	GPI anchor biosynthetic process	transferase activity*	0	-1.06	-1.21	-1.27	-1.25	-1.26	-1.59	-1.7	-1.48	-0.51	-1.45	-1.41	-1.58	-1.69	-1.58	-1.43	-1.4	-1.18	-0.52	-0.96	-1.09	-1.49	-1.49	-1.47	-1.55	-1.56	-1.06	-0.37	-0.64	-0.23	-0.31	-0.18	-0.13	-1.36	-0.96	-0.41	-0.56	-0.37	-0.26	-1.62	-1.77	-1.59	-1.32	-1.58	-1.08	-0.393423
YBR007C	DSF2	biological_process	molecular_function*	0	-1.13	-1.27	-1.47	-2.54	-2.21	-2.23	-2.11	-2.11	-0.095	0.485	0.025	-1.055	-1.775	-1.145	-0.725	-0.645	-0.355	-0.11	-0.26	-0.29	-0.68	-2.44	-2.46	-2.39	-2.3	-2.18	-0.73	-0.84	-0.8	-0.62	-0.33	-0.39	0.52	0.29	0.12	-0.13	-0.02	0.06	0.41	0.4	0.26	0	0.13	0.33	-0.928883
YBR015C	MNN2	protein amino acid glycosylation	alpha-1,2-mannosyltransferase activity	0	-0.47	-0.34	-0.57	-0.66	-0.62	-0.78	-0.68	-1.11	-0.315	-0.795	-0.835	-1.135	-1.155	-1.135	-0.975	-0.815	-0.825	-0.37	-0.24	-0.21	-0.62	-0.85	-1.1	-1.13	-1.16	-1.11	-0.29	-0.47	-0.15	-0.03	0.1	0.1	0.36	0.36	-0.24	-0.3	-0.15	0.29	-0.505	-0.395	-0.355	-0.245	-0.225	0.015	-0.13
YBR017C	KAP104	transport*	binding*	0	-0.45	-0.68	-0.69	-0.6	-0.37	-0.4	-0.28	-0.38	-0.14	-1.27	-0.92	-1.01	-1.15	-1.32	-1.26	-1.3	-1.28	0.115	0.005	-0.115	-0.485	-0.645	-0.825	-0.885	-0.785	-0.705	-0.41	-0.24	-0.15	0.07	0.17	0.24	-0.13	-0.04	-0.15	-0.14	-0.15	0.3	0.285	0.505	0.445	0.555	0.455	0.685	-0.22
YBR023C	CHS3	spore wall assembly (sensu Fungi)*	transferase activity*	0	-0.63	-0.79	-1.03	-1.71	-1.46	-1.89	-1.95	-2.15	-0.545	-0.805	-1.145	-1.685	-1.665	-1.405	-1.185	-1.295	-1.405	-0.755	-0.685	-0.885	-1.635	-2.385	-2.225	-2.045	-1.955	-1.805	-0.17	-0.21	0.03	0.1	0.02	-0.04	0.41	0.24	-0.13	-0.24	0.06	0.2	-1.295	-1.115	-1.195	-0.965	-0.935	-0.815	-0.49
YBR030W	YBR030W	phospholipid metabolic process	molecular_function	0	-1.48	-1.17	-0.87	-1.2	-1.09	-1.42	-1.17	-1.03	-0.055	-1.375	-1.735	-1.585	-1.315	-1.255	-1.035	-0.965	-0.965	0.13	-0.17	-0.45	-0.98	-0.97	-0.68	-0.69	-0.56	-0.7	-0.61	-0.28	-0.32	-0.31	-0.13	-0.04	-0.44	-0.37	-0.1	-0.3	-0.08	-0.09	-1.145	-0.995	-0.975	-1.025	-0.865	-0.835	-0.24
YBR066C	NRG2	transcription*	metal ion binding*	0	0.52	0.66	-0.24	-0.49	-1.81	-2.84	-2.93	-2.52	0.195	1.285	1.475	1.455	-1.645	-2.005	-1.895	-1.715	-1.455	0.245	0.815	0.955	1.495	-1.075	-2.405	-2.485	-2.535	-2.135	0.33	0.34	0.19	0	0.29	0.21	0.71	1.37	1.43	1.38	1.1	0.61	0.76	0.62	0.51	0.37	0.28	0.11	-0.415462
YBR082C	UBC4	ubiquitin cycle*	ligase activity*	0	-0.2	-0.72	-1.12	-2.18	-2.29	-2.39	-2.46	-2.31	-0.015	-0.025	-0.385	-0.625	-0.325	-0.505	-0.635	-0.895	-1.055	-0.04	-0.07	5.55e-17	-0.57	-1.43	-1.44	-1.68	-1.84	-1.52	-0.82	-1.08	-0.64	-0.38	-0.18	0.02	-1.41	-1.31	-0.91	-0.29	-0.18	-0.04	-1.12	-1.1	-0.84	-0.78	-0.33	-0.15	-0.557757
YBR106W	PHO88	transport*	molecular_function	0	-1.01	-1.12	-1.49	-2.36	-2.39	-2.99	-2.89	-2.77	-0.335	-0.585	-1.235	-1.755	-1.835	-1.985	-2.065	-2.085	-2.265	-0.41	-0.44	-0.35	-0.73	-2.04	-2.25	-2.35	-2.37	-2.44	-1.1	-0.95	-0.97	-1	-0.51	-0.23	-1.08	-1.05	-0.45	-0.36	0.02	-0.17	-0.705	-0.585	-0.325	-0.285	-0.355	-0.145	-0.839558
YBR166C	TYR1	amino acid biosynthetic process*	oxidoreductase activity*	0	-0.89	-0.69	-0.42	-1.12	-1.08	-1.33	-1.23	-1.11	0.205	-0.115	-0.455	-0.675	-1.155	-0.825	-0.715	-0.615	-0.445	0.115	-0.125	-0.105	-0.265	-0.725	-0.845	-0.885	-0.915	-0.925	0.55	0.45	0.18	0.05	0.05	0.23	-0.76	-0.32	0.42	0.42	0.26	0.17	-0.05	0	-0.07	-0.16	-0.04	0.07	-0.13
YBR175W	SWD3	telomere maintenance*	histone lysine N-methyltransferase activity (H3-K4 specific)	0	-0.87	-1.39	-1.41	-2.43	-2.61	-2.91	-3.04	-2.93	-0.105	-0.485	-1.415	-1.325	-1.435	-1.495	-1.455	-1.365	-1.405	0.03	0.12	-0.22	-1.03	-1.39	-1.39	-1.27	-1.35	-1.49	-0.5	-0.11	-0.42	-0.04	0.14	0.29	-1.1	-0.65	-0.44	-0.12	-0.08	0.48	-0.67	-0.56	-0.16	-0.02	0.23	0.69	-0.04
YBR182C	SMP1	transcription*	DNA binding*	0	-1.49	-1.07	-0.49	-1.35	-1.22	-1.52	-0.9	-0.96	0.01	0.29	-0.56	-0.52	-0.91	-0.74	-0.28	-0.24	0.07	-0.155	-0.895	-0.225	-1.045	-1.475	-1.045	-0.855	-0.705	-0.055	0.11	0.15	1.01	0.73	0.05	-0.25	0.81	0.63	-0.25	-0.08	-0.5	0.01	-1.155	-1.015	-0.875	-1.035	-0.835	-0.995	-0.78
YBR187W	GDT1	ribosome biogenesis and assembly	molecular_function	0	-1.98	-1.42	-1.33	-1.74	-1.66	-1.92	-1.9	-1.66	-0.4	-1.12	-0.76	-0.95	-1.31	-1.29	-1.22	-1.25	-1.38	-0.41	-0.56	-0.55	-1.25	-1.82	-1.92	-2.04	-2.08	-2.01	-0.94	-1.03	-0.88	-0.39	-0.25	-0.22	-0.77	-0.09	-0.17	-0.06	-0.08	0.01	-0.975	-0.895	-0.675	-0.335	-0.465	-0.175	-0.455759
YBR213W	MET8	response to drug*	catalytic activity*	0	-0.26	-0.49	-1.88	-1.04	-0.66	-1	-1.03	-0.78	-0.41	-1.54	-1.93	-1.94	-1.21	-0.66	-0.37	-0.18	0.41	-0.53	-0.57	-1.47	-2.07	-2.6	-2.38	-2.23	-2.23	-1.98	-0.61	-0.72	-0.66	-0.35	-0.1	0.29	0.18	0.09	-1.47	-1.49	-0.7	0.05	-3.165	-2.835	-2.645	-2.425	-2.065	-1.495	-0.80402
YBR246W	YBR246W	biological_process	molecular_function	0	-0.58	-0.62	-0.79	-0.83	-0.63	-0.78	-0.83	-0.86	-0.02	-0.13	-0.84	-1.03	-1.2	-1.01	-0.87	-0.95	-1.1	-0.17	-0.13	-0.22	-0.96	-1.02	-1.01	-0.93	-1.06	-0.71	-0.7	-0.64	-0.56	-0.25	0.02	0.23	-1	-0.82	-0.56	-0.18	-0.07	0.27	-1.155	-1.005	-0.915	-0.755	-0.635	-0.425	-0.96
YBR249C	ARO4	metabolic process*	transferase activity*	0	-0.91	-0.57	0.08	-1.24	-1.13	-2.2	-2.57	-3.14	0.3	-2.17	-2.51	-0.93	-1.21	-1.05	-1.07	-1	-1.25	-0.125	-0.185	-0.275	-1.055	-0.915	-1.435	-1.305	-1.705	-2.275	0.56	0.35	-0.47	-0.54	-0.31	-0.18	-1.25	-1.11	-1.65	-1.04	-0.98	-0.49	0.035	0.085	-0.025	-0.175	0.455	0.265	0.209512
YBR261C	YBR261C	biological_process	S-adenosylmethionine-dependent methyltransferase activity	0	-1.68	-1.58	-1.36	-2.52	-2.8	-3.34	-3.44	-3.58	0.075	-0.475	-1.135	-1.185	-1.805	-1.735	-1.535	-1.525	-1.825	0.135	-0.105	-0.265	-0.715	-1.535	-1.685	-1.865	-1.595	-1.735	-0.54	-0.38	-0.56	-0.51	-0.33	0.07	-0.46	-0.5	-0.68	-1.14	-0.47	-0.21	-0.535	-0.495	-0.585	-0.785	-0.405	0.065	-0.785809
YBR283C	SSH1	transport*	protein transporter activity*	0	-0.49	-0.58	-0.83	-1.35	-1.22	-1.72	-1.87	-1.74	-0.535	-1.295	-1.405	-1.745	-2.035	-2.015	-1.915	-1.965	-2.105	-0.73	-0.75	-0.98	-1.64	-2.07	-2.25	-2.06	-2.66	-2.17	-1.09	-0.91	-0.62	-0.44	-0.38	-0.32	-0.96	-0.94	-0.96	-0.6	-0.36	-0.27	-1.43	-1.37	-0.96	-0.54	-0.64	-0.3	0
YBR288C	APM3	transport*	molecular_function	0	-0.55	-0.65	-0.84	-1.46	-1.48	-1.63	-1.64	-1.65	0.105	0.015	-0.415	-0.615	-1.025	-1.045	-0.975	-1.005	-1.045	0.115	0.105	-0.035	-0.855	-1.325	-1.325	-1.175	-0.905	-1.125	-0.22	-0.2	-0.06	-0.01	0.03	0.08	-0.18	0.3	0.62	0.66	0.57	0.26	-0.27	-0.2	-0.06	-0.11	0.14	0.23	0.17
YCL002C	YCL002C	biological_process	molecular_function	0	-1.31	-1.39	-1.18	-1.08	-0.98	-0.6	-0.42	-0.32	-0.39	-1.21	-1.04	-0.73	-0.89	-0.92	-0.8	-0.96	-0.77	-0.365	-0.625	-0.885	-1.335	-0.965	-1.025	-1.305	-1.085	-1.085	-0.14	-0.06	-0.41	-0.21	-0.06	-0.15	-1.11	-0.33	0.23	0.04	0.05	-0.09	-1.725	-1.355	-1.225	-0.745	-0.955	-0.745	-0.18
YCL047C	YCL047C	biological_process*	molecular_function*	0	-0.12	-0.44	-0.82	-1.98	-1.72	-2.43	-2.59	-3.21	-0.25	0.07	0.05	-0.83	-1.52	-1.38	-1.34	-1.45	-1.51	-0.05	-0.13	0.17	0.26	-0.37	-0.43	-0.33	-0.33	-0.23	-0.73	-0.3	-0.42	-0.15	-0.1	-0.06	-0.63	-0.49	0.07	-0.14	-0.31	-0.31	1.07	0.89	0.73	0.79	0.51	0.61	-0.890619
YCL050C	APA1	nucleotide metabolic process	transferase activity*	0	-0.7	-0.99	-1.29	-1.14	-1.58	-1.61	-1.66	-1.82	0.135	-0.455	-0.725	-0.475	-0.135	-0.125	-0.265	-0.345	-0.485	0.105	0.205	0.015	-0.485	-0.595	-0.815	-0.725	-0.995	-1.275	-0.25	-0.66	-0.35	-0.37	-0.1	0.05	-0.34	-0.13	-0.05	-0.11	0.05	0.3	-0.74	-0.7	-0.64	-0.5	-0.22	0.04	0.765504
YCR020W-B	HTL1	transcription*	chromatin binding	0	-0.79	-0.77	-0.69	-0.83	-0.81	-0.92	-0.69	0.06	-0.665	-0.705	-0.555	-0.635	-0.795	-0.875	-0.835	-1.075	-0.945	0.4	0.38	0.34	-0.24	-0.72	-0.79	-1.12	-1.28	-1.07	-0.21	0.51	-0.01	-0.01	0.28	0.36	-0.77	-0.3	0.87	0.92	1.1	0.41	0.24	-0.1	0.19	0.49	0.44	0.81	-0.74
YCR052W	RSC6	transcription*	DNA-dependent ATPase activity	0	-0.55	-0.71	-0.54	-1.04	-1	-1.08	-0.62	-0.69	0.055	-0.185	-0.535	-1.065	-1.005	-0.815	-0.775	-0.735	-0.605	0.075	-0.005	0.055	-0.405	-0.935	-0.805	-0.925	-0.935	-0.915	0.34	-0.06	0.74	0.65	0.39	0.35	1.39	0.84	-0.5	-0.52	-0.07	0.46	-3.005	-2.805	-2.665	-2.635	-2.125	-2.015	-0.27
YCR053W	THR4	metabolic process*	catalytic activity*	0	-1.3	-1.24	-1.13	-1.89	-1.77	-2.18	-2.49	-2.53	0.15	-1.79	-1.75	-1.62	-1.62	-1.38	-1.48	-1.6	-1.44	0.225	-0.015	-0.035	-0.565	-0.675	-0.765	-0.765	-1.235	-1.315	-0.13	-0.4	-0.47	-0.42	-0.21	-0.04	-0.98	-1.1	-1.48	-1.1	-0.74	-0.1	-1.125	-1.215	-1.095	-0.985	-0.635	-0.455	0.2
YDL036C	PUS9	RNA processing*	RNA binding*	0	-1.16	-1.02	-1	-0.84	-0.83	-0.94	-1.06	-1.22	-0.145	-0.725	-1.055	-0.955	-1.055	-0.925	-0.725	-0.685	-0.775	-0.12	-0.28	-0.52	-0.89	-0.98	-1.16	-0.98	-1.08	-0.93	-0.81	-0.52	-0.5	-0.37	-0.28	-0.04	-0.36	-0.41	-0.62	-0.32	-0.12	-0.05	-0.91	-0.73	-0.72	-0.86	-0.47	-0.86	-0.132921
YDL050C	YDL050C	biological_process	molecular_function	0	-1.32	-1.31	-1.09	-0.82	-0.69	-0.79	-0.84	-0.62	-0.275	-1.325	-0.865	-0.905	-0.665	-1.005	-1.105	-1.125	-1.185	0.145	-0.105	-0.435	-1.055	-1.445	-1.645	-1.555	-1.545	-1.535	-0.12	-0.08	-0.1	-0.03	0.13	0.14	-0.21	-0.18	-0.12	0.02	0.05	0	-1.355	-1.495	-1.545	-1.525	-1.525	-0.975	-0.180356
YDL059C	RAD59	response to DNA damage stimulus*	protein binding*	0	0.46	0	-1	-0.32	-1.02	-1.47	-2.23	-2.92	-0.16	1.18	0.38	-0.01	-0.15	0.02	0.35	0.71	1.91	-0.255	0.275	-0.385	-1.065	-3.045	-3.155	-3.015	-2.695	-2.675	-0.19	0.18	-0.12	-0.03	0.12	0.14	0.9	1.09	1.21	1.32	1.11	0.36	-1.545	-1.415	-1.195	-1.245	-0.855	-0.855	-0.844235
YDL092W	SRP14	protein targeting*	RNA binding*	0	-0.35	-1.08	-1.11	-1.57	-1.49	-1.38	-0.58	-0.68	-0.18	-0.63	-1.18	-1.59	-1.54	-1.64	-1.69	-1.54	-1.28	0.225	0.035	-0.025	-0.995	-1.425	-1.275	-1.385	-1.365	-1.315	-0.58	-0.2	-0.49	-0.47	-0.1	-0.1	-1.86	-1.17	-0.14	0.07	0.06	-0.22	0.5	0.56	0.84	1.08	1.03	1.4	-1.30456
YDL111C	RRP42	rRNA processing*	hydrolase activity*	0	-1.28	-1.29	-1.24	-1.94	-2.08	-2.44	-2.29	-2.49	-0.045	-1.415	-1.255	-1.425	-1.985	-2.175	-2.155	-2.055	-2.105	0.155	-0.105	-0.145	-0.875	-1.495	-1.415	-1.565	-1.425	-1.505	-0.39	-0.23	-0.24	-0.06	0.15	0.25	-1.71	-0.93	-0.05	-0.12	-0.01	0.31	-0.175	-0.145	-0.065	0.075	0.045	0.545	-0.618945
YDL131W	LYS21	metabolic process*	transferase activity*	0	-1.02	-0.75	-0.29	-1.15	-0.99	-1.85	-1.91	-1.94	0.07	0.12	-0.93	-0.44	-0.78	-0.33	-0.55	-0.64	-0.56	-0.13	-0.13	-0.07	-0.84	-1.14	-1.53	-1.64	-2.14	-2.2	0.27	0.07	0.04	-0.05	-0.01	0.16	-0.49	-0.49	-0.97	-0.54	-0.28	0.14	-0.935	-0.875	-0.825	-0.995	-0.595	-0.675	-0.112824
YDL166C	FAP7	transcription*	nucleotide binding*	0	-1.22	-0.84	-0.54	-0.76	-0.86	-0.9	-1.25	-0.17	-0.085	-1.345	-0.695	-0.985	-1.015	-0.665	-0.685	-0.725	-0.645	0.245	0.265	0.245	-0.245	-0.995	-0.975	-1.035	-1.165	-1.075	-0.01	0.32	0.16	-0.03	0.24	0.39	-0.72	-0.43	0.33	0.46	0.51	0.41	-0.11	-0.13	-0.02	0.03	0.11	0.3	-0.53
YDL189W	RBS1	galactose metabolic process	molecular_function*	0	-0.83	-0.93	-0.98	-1.46	-1.81	-2.4	-2.88	-3.13	-0.11	-0.38	-0.76	-0.87	-1.36	-1.48	-1.49	-1.53	-1.68	-0.06	0.08	-0.06	-0.32	-0.56	-1.09	-0.84	-0.97	-1.21	-0.26	-0.35	-0.24	-0.3	-0.26	-0.07	-0.18	-0.22	-0.32	-0.42	-0.17	-0.14	-0.45	-0.35	-0.32	-0.35	-0.35	-0.42	0
YDL235C	YPD1	response to osmotic stress*	transferase activity, transferring phosphorus-containing groups	0	-0.22	-0.23	-0.49	-1.06	-1.1	-1.33	-1.49	-1.41	0.025	0.045	-0.205	-0.565	-1.205	-1.335	-1.265	-1.275	-1.335	0.145	0.125	0.105	-0.165	-0.755	-0.755	-0.975	-0.995	-1.055	0.11	0.37	0.13	0.08	0.2	0.11	-0.91	-0.66	0.15	0.44	0.38	0.3	-0.36	-0.41	-0.27	-0.16	-0.23	-0.23	-0.4
YDL236W	PHO13	metabolic process*	hydrolase activity*	0	-0.8	-0.8	-0.65	-1.84	-2	-2.85	-3.36	-3.5	0.25	0.75	0.19	-0.57	-1.22	-1.16	-1.22	-1.34	-1.46	0.195	0.345	0.395	0.835	0.475	0.405	0.115	0.265	-0.035	-0.25	-0.02	0.1	0.14	0.33	0.27	0.05	0.48	0.74	1.02	0.85	0.86	1.21	0.98	0.79	0.7	0.65	0.85	-0.874457
YDR002W	YRB1	transport*	GTPase activator activity*	0	-0.66	-0.36	-0.63	-1.74	-1.38	-1.58	-1.69	-1.5	0.245	0.035	-0.065	-0.235	-0.535	-0.445	-0.355	-0.185	-0.295	0.18	0.06	0.25	-0.51	-1.47	-1.2	-1.12	-0.84	-1.05	-0.05	0.11	-0.06	-0.12	-0.07	0.01	-0.64	-0.38	0.35	0.51	0.46	-0.08	-0.55	-0.29	-0.08	-0.22	0.03	-0.14	-0.872013
YDR023W	SES1	translation*	nucleotide binding*	0	-0.7	-0.36	-0.76	-1.21	-1.4	-2.29	-3.02	-3.52	0.14	-0.86	-1.4	-1.75	-2.47	-2.46	-2.47	-2.52	-2.65	0.075	-0.005	-0.115	-0.985	-1.865	-1.955	-1.915	-2.095	-2.035	-1.01	-0.98	-0.58	-0.41	-0.29	-0.3	-0.8	-0.73	-0.41	-0.36	-0.11	-0.05	-1.11	-0.76	-0.71	-0.73	-0.56	-0.78	-0.544453
YDR033W	MRH1	biological_process*	molecular_function*	0	-0.22	0.87	0.05	-1.43	-2.17	-3.37	-3.76	-3.61	-0.45	-1.16	0.11	0.65	-1.1	-1.99	-2.41	-2.71	-2.45	-0.72	-1.08	-0.8	0.54	-1.56	-2.36	-1.86	-2.01	-2.42	0.55	1.31	0.71	0.92	-0.28	-1	2.1	2.23	1.59	0.94	-0.26	-1.12	-1.545	-1.385	-1.115	-1.295	-2.235	-2.865	1.04079
YDR119W	YDR119W	biological_process*	molecular_function*	0	-1.49	-1.24	-0.45	-1.33	-1.59	-1.87	-1.86	-2.29	-0.12	0.15	-0.25	-0.15	-1.29	-1.62	-1.63	-1.74	-1.91	-0.42	-0.38	-0.98	-1.38	-1.87	-2.19	-2.2	-2.36	-2.33	0.2	0.14	0.1	0.11	0.18	0.13	0.46	1.15	1.25	0.67	0.79	0.64	-1.655	-1.325	-1.265	-1.165	-1.235	-0.905	0.32
YDR156W	RPA14	transcription*	transferase activity*	0	-0.91	-0.95	-0.64	-0.68	-0.68	-0.93	-1.37	-0.83	-0.11	-2.26	-1.34	-0.74	-0.74	-0.84	-0.76	-0.83	-0.79	0.1	-0.34	-0.56	-0.88	-0.98	-1.28	-1.56	-1.81	-1.68	-0.7	-0.45	-0.8	-0.66	-0.28	-0.15	-1.2	-1.28	-1.52	-1.02	-0.81	-0.06	-1.695	-1.285	-1.035	-0.665	-0.545	-0.485	0.21442
YDR172W	SUP35	translation*	nucleotide binding*	0	-0.65	-0.58	-0.4	-0.63	-0.29	-0.61	-0.54	-0.91	0.15	-1.4	-1.15	-1.07	-1.52	-1.6	-1.66	-1.59	-1.87	0.27	0.16	0.14	-0.38	-0.66	-0.75	-0.7	-0.71	-0.71	-0.05	-0.18	0.36	0.43	0.29	0.21	0.14	0.12	-0.25	0.06	0.15	0.15	-0.865	-0.745	-0.745	-0.945	-0.635	-0.795	-0.3
YDR190C	RVB1	transcription*	nucleotide binding*	0	-1.01	-0.61	-0.6	-0.35	-0.33	-0.58	-0.92	-1.11	0.125	-1.655	-1.115	-1.375	-1.745	-1.695	-1.635	-1.615	-1.755	0.17	-0.05	-0.13	-0.36	-0.88	-0.9	-0.83	-0.84	-0.95	-0.62	-0.55	-0.05	-0.1	0.05	-0.06	-0.37	-0.34	-0.3	0.2	0.14	-0.01	0.16	0.17	0.32	0.12	0.34	0.07	-0.13
YDR198C	RKM2	peptidyl-lysine tri-methylation*	transferase activity*	0	-0.62	-0.67	-0.59	-0.56	-0.59	-1	-1.53	-2	0.05	-0.48	-0.54	-0.25	-0.54	-0.65	-0.57	-0.61	-0.93	0.11	-0.16	-0.38	-0.54	-0.38	-0.4	-0.33	-0.27	-0.24	-0.29	-0.26	-0.2	-0.26	-0.08	0.06	-0.13	-0.01	0.22	0.29	0.31	0.08	-0.21	-0.33	-0.26	-0.28	-0.21	-0.13	-0.05
YDR233C	RTN1	biological_process	molecular_function	0	-0.4	-0.45	-0.46	-0.03	-0.42	-0.93	-1.07	-1.85	-0.365	-1.005	-0.685	-0.765	-1.145	-1.185	-1.285	-1.195	-1.535	-0.355	-0.595	-0.715	-1.105	-1.235	-1.375	-1.525	-1.695	-1.625	-1.21	-1.3	-0.59	-0.36	-0.27	-0.23	-1	-0.75	-0.95	-0.48	-0.38	-0.11	-0.31	-0.54	-0.68	-0.49	-0.49	-0.3	0.29
YDR234W	LYS4	metabolic process*	metal ion binding*	0	-2.71	-1.75	-0.91	-1.66	-0.93	-2.26	-2.75	-2.59	0.065	-1.635	-2.065	-0.895	-0.475	0.505	0.365	0.255	0.445	0.025	-0.175	-0.295	-1.515	-1.665	-1.745	-1.705	-1.515	-1.685	0.66	0.26	0.07	-0.09	0.16	0.46	0.67	0.27	-0.57	-0.15	-0.11	0.18	-0.58	-0.59	-0.56	-0.86	-0.29	-0.22	-0.337884
YDR245W	MNN10	actin filament organization*	transferase activity*	0	-1.69	-1.58	-1.38	-1.77	-1.69	-1.76	-2.02	-1.91	-0.35	-0.84	-0.97	-1.39	-1.53	-1.36	-1.32	-1.16	-1.23	-0.375	-0.455	-0.535	-1.115	-1.645	-1.595	-1.325	-1.255	-1.305	-0.36	-0.2	-0.19	-0.34	-0.17	-0.05	-0.31	-0.09	0.23	0.26	0.39	0.11	-0.01	0.07	0.1	0.22	0.2	0.13	-0.94
YDR257C	SET7	biological_process	molecular_function	0	-0.5	-0.74	-0.86	-2.17	-1.84	-2.5	-2.53	-2.55	0.03	-0.65	-1.18	-1.7	-2.22	-2.02	-1.84	-1.71	-1.28	0.085	-0.085	-0.305	-0.895	-2.145	-2.695	-2.605	-2.655	-2.595	-0.35	-0.27	-0.53	-0.63	-0.44	-0.09	-0.99	-0.71	-0.25	-0.2	-0.1	-0.26	-1.09	-0.72	-0.61	-0.6	-0.37	-0.39	-0.78
YDR266C	YDR266C	biological_process	molecular_function*	0	-0.57	-0.78	-0.79	-0.8	-0.66	-1	-0.91	-0.84	-0.025	-0.995	-1.125	-1.185	-1.225	-1.275	-1.215	-1.235	-1.145	0.245	0.065	-0.055	-0.455	-0.685	-0.665	-0.675	-0.845	-0.685	-0.41	-0.45	-0.17	-0.23	-0.1	-0.15	0.21	0.09	-0.36	-0.36	-0.29	-0.04	-0.78	-0.59	-0.6	-0.72	-0.76	-0.83	-0.670143
YDR280W	RRP45	rRNA processing*	hydrolase activity*	0	-1.25	-1.24	-1.04	-1.62	-1.74	-2.24	-2.86	-2.82	0.025	-1.155	-0.855	-0.715	-1.205	-1.225	-1.305	-1.245	-1.385	0.125	0.015	-0.185	-0.415	-0.975	-1.405	-1.495	-1.555	-1.615	-0.36	-0.24	-0.11	-0.12	-0.06	0.06	-0.43	-0.47	-0.31	0.02	-0.06	0.05	-0.125	-0.035	-0.025	-0.195	0.135	0.205	-0.62
YDR302W	GPI11	GPI anchor biosynthetic process	mannose-ethanolamine phosphotransferase activity	0	-0.99	-1	-1.05	-1.68	-1.46	-1.3	-0.88	-0.65	-0.59	-0.53	-0.76	-1.22	-1.34	-1.45	-1.57	-1.71	-1.62	-0.43	-0.71	-0.48	-1.07	-1.28	-1.36	-1.32	-1.31	-1.56	-0.79	-0.62	-0.6	-0.41	-0.02	0.21	-1.55	-0.88	-0.35	-0.06	0.09	0.18	-1.275	-1.195	-0.685	-0.345	-0.215	0.085	-1.65438
YDR326C	YSP2	apoptosis	molecular_function	0	-0.89	-0.89	-0.73	-1.81	-1.76	-2.25	-2.27	-2.43	-0.665	-0.605	-0.365	-0.765	-0.935	-0.765	-0.795	-0.885	-0.955	-0.75	-0.74	-0.82	-0.5	-1.06	-0.8	-0.54	-0.71	-0.43	-0.74	-0.11	-0.1	-0.3	-0.42	-0.62	-0.95	-0.51	0.29	0.13	0.02	-0.51	-0.545	-0.545	-0.505	-0.095	-0.695	-0.675	0.19
YDR331W	GPI8	proteolysis*	hydrolase activity*	0	-0.95	-1.06	-1.22	-1.26	-1	-0.9	-0.7	-0.54	-0.44	-0.72	-0.94	-1.26	-1.25	-1.24	-1.27	-1.34	-1.47	-0.565	-0.665	-0.695	-1.045	-1.455	-1.555	-1.715	-1.725	-1.705	-0.75	-0.82	-0.61	-0.5	-0.29	-0.21	-0.92	-0.68	-0.09	0.25	-0.01	0.21	-0.305	-0.325	-0.365	-0.205	-0.255	0.055	-0.62065
YDR341C	YDR341C	translation*	nucleotide binding*	0	-1.99	-1.03	-0.57	-1.15	-0.8	-1.38	-1.48	-1.55	0.12	-2.26	-1.5	-1.11	-1.1	-0.95	-0.97	-1.02	-0.95	0.165	-0.075	-0.245	-0.825	-1.155	-1.205	-1.225	-1.665	-1.515	0.05	0.1	-0.08	-0.25	-0.08	0.15	-0.81	-0.93	-0.71	-0.25	-0.16	0.13	-0.42	-0.29	-0.26	-0.21	-2.78e-17	-0.14	-0.165186
YDR345C	HXT3	transport*	transporter activity*	0	-3.82	-5.67	-5.61	-5.18	-4.71	-3.83	-3.29	-1.81	-0.17	-0.91	0.07	0.09	-1.71	-1.54	-1.51	-1.59	-0.02	-0.4	-0.32	-0.41	-0.22	-0.32	-0.05	0.14	0.45	2.2	0.56	0.28	-0.08	-0.59	1.3	0.71	5.16	5.67	5.16	5.27	4.99	5.31	-2.245	-1.595	-1.125	-0.835	-0.795	-0.375	-0.170566
YDR410C	STE14	response to pheromone*	transferase activity*	0	-0.61	-1.25	-1.7	-2.25	-2.46	-2.55	-2.96	-2.64	-0.395	-0.115	-0.565	-0.845	-1.055	-1.235	-1.345	-1.455	-1.625	-0.385	-0.305	-0.555	-0.915	-1.055	-1.285	-1.205	-1.155	-1.235	-1.18	-0.76	-0.68	-0.52	-0.19	0	-1.56	-1.11	-0.53	-0.18	0.08	0.3	-1.06	-1.25	-1.24	-0.83	-1	-0.34	-0.559624
YDR415C	YDR415C	biological_process*	molecular_function*	0	0.01	-0.29	-0.42	-0.65	-0.81	-1.04	-1.02	-1.09	-0.38	0.19	-0.26	-0.62	-0.98	-0.64	-0.46	-0.47	-0.74	-0.645	-0.605	-0.825	-0.865	-1.145	-0.955	-0.945	-0.915	-0.875	-0.32	-0.44	-0.24	-0.3	-0.2	-0.1	0.1	-0.01	-0.1	0	-0.07	0.12	-0.31	-0.24	-0.31	-0.42	-0.34	-0.3	-0.817928
YDR428C	YDR428C	biological_process	molecular_function*	0	-0.28	-0.12	-0.5	-0.48	-0.89	-1.34	-1.41	-0.83	0	-1.11	-0.88	-0.88	-1.35	-1.44	-1.4	-1.41	-1.4	0.25	0.02	-0.06	-0.46	-0.71	-0.83	-0.85	-0.94	-0.86	-0.28	0.01	-0.11	-0.3	0	0.21	-0.66	-0.55	0.08	0.21	0.19	0.29	-0.645	-0.505	-0.535	-0.335	-0.695	-0.535	-0.737354
YDR429C	TIF35	translation*	nucleotide binding*	0	-0.78	-0.56	-0.81	-0.63	-0.15	0.14	0	0.12	0.105	-2.235	-1.725	-1.415	-1.225	-0.945	-0.855	-0.825	-0.835	0.24	0.1	-0.11	-0.83	-1.16	-1.03	-0.88	-0.91	-1.01	-0.38	-0.29	-0.26	-0.4	-0.06	0.07	-0.83	-0.62	-0.08	-0.02	0	-0.12	-0.775	-0.445	-0.295	-0.555	-0.185	-0.385	-0.637849
YDR432W	NPL3	rRNA processing*	RNA binding*	0	0.01	-0.71	-0.89	-1.98	-1.35	-1.61	-0.98	0.27	-0.18	-0.14	-0.84	-1.45	-1.74	-1.9	-1.9	-1.92	-1.44	0.06	0.19	0.15	-0.3	-1.18	-1.68	-1.74	-1.82	-1.78	-0.58	-0.65	0.22	0.33	0.35	0.19	0.55	0.26	-1.33	-1.09	-0.55	0.33	-2.08	-1.68	-1.17	-0.86	-0.26	-0.03	-0.110558
YDR432W	NPL3	rRNA processing*	RNA binding*	0	0.01	-0.71	-0.89	-1.98	-1.35	-1.61	-0.98	0.27	-0.18	-0.14	-0.84	-1.45	-1.74	-1.9	-1.9	-1.92	-1.44	0.06	0.19	0.15	-0.3	-1.18	-1.68	-1.74	-1.82	-1.78	-0.58	-0.65	0.22	0.33	0.35	0.19	0.55	0.26	-1.33	-1.09	-0.55	0.33	-2.08	-1.68	-1.17	-0.86	-0.26	-0.03	-0.110558
YDR461W	MFA1	pheromone-dependent signal transduction during conjugation with cellular fusion	mating pheromone activity*	0	-0.07	-0.98	-2.47	-1.49	-1.63	-1.69	-1.42	-1.27	0.34	1.03	0.35	-0.74	-1.66	-1.74	-1.81	-1.76	-1.64	0.87	1.27	0.09	1.12	-1.2	-1.46	-1.67	-1.65	-1.32	-1.02	0.14	0.39	0.36	0.3	0.29	0.44	2.28	3.97	3.56	2.68	1.98	3.41	3.23	2.55	2.45	1.87	1.56	0.390453
YDR461W	MFA1	pheromone-dependent signal transduction during conjugation with cellular fusion	mating pheromone activity*	0	-0.07	-0.98	-2.47	-1.49	-1.63	-1.69	-1.42	-1.27	0.34	1.03	0.35	-0.74	-1.66	-1.74	-1.81	-1.76	-1.64	0.87	1.27	0.09	1.12	-1.2	-1.46	-1.67	-1.65	-1.32	-1.02	0.14	0.39	0.36	0.3	0.29	0.44	2.28	3.97	3.56	2.68	1.98	3.41	3.23	2.55	2.45	1.87	1.56	0.390453
YDR489W	SLD5	DNA replication*	molecular_function	0	-0.12	-0.14	-0.43	-0.34	-0.34	-0.36	-0.48	-0.57	-0.035	0.295	0.045	-0.335	-0.235	-0.385	-0.515	-0.645	-0.755	-0.095	-0.115	-0.125	-0.785	-1.385	-1.595	-1.235	-1.335	-1.145	-0.46	-0.31	-0.25	0	0.21	0.38	-0.94	-0.54	-0.18	-0.12	-0.13	0.31	-0.35	-0.28	-0.15	0.15	0.25	0.52	-1.12131
YDR528W	HLR1	cell wall organization and biogenesis	molecular_function	0	-1.34	-0.91	-0.94	-1.31	-0.91	-1.03	-0.71	-0.7	0.15	0.06	-0.06	-0.63	-0.85	-0.89	-1.06	-1.13	-1.08	0.175	0.345	0.475	0.065	-1.295	-1.385	-1.425	-1.475	-1.335	-1.22	-0.94	-0.75	-0.75	-0.25	-0.32	-0.19	0.02	0.09	-0.02	0.12	0.18	0.43	0.56	0.44	0.52	0.66	0.88	-0.30328
YEL015W	EDC3	deadenylation-independent decapping	molecular_function	0	-0.49	-0.48	-0.46	-0.78	-0.9	-1.25	-1.48	-1.75	0.11	-0.4	-0.18	-0.59	-0.87	-0.86	-0.84	-0.83	-0.97	0.22	0.13	0.09	-0.36	-0.83	-0.94	-0.86	-0.94	-0.99	-0.24	-0.22	0.14	0.06	0	-0.13	0.3	0.07	-0.3	-0.01	0.15	0.13	-0.275	-0.125	-0.105	-0.245	-0.105	-0.265	-0.78
YEL017C-A	PMP2	cation transport	molecular_function	0	-0.64	-0.98	-1.23	-1.49	-1.66	-1.9	-1.48	-1.41	-0.415	-1.005	-0.665	-0.815	-0.855	-1.065	-1.145	-1.385	-0.985	-0.24	-0.43	-0.51	-0.61	-1.31	-0.87	-0.76	-0.61	-0.43	-0.44	0.12	-0.15	-0.22	-0.03	-0.23	-1.11	-0.84	-0.2	0.41	-0.1	-0.08	-1.05	-0.83	-0.68	-0.37	-0.71	-0.52	0.416541
YEL017C-A	PMP2	cation transport	molecular_function	0	-0.64	-0.98	-1.23	-1.49	-1.66	-1.9	-1.48	-1.41	-0.415	-1.005	-0.665	-0.815	-0.855	-1.065	-1.145	-1.385	-0.985	-0.24	-0.43	-0.51	-0.61	-1.31	-0.87	-0.76	-0.61	-0.43	-0.44	0.12	-0.15	-0.22	-0.03	-0.23	-1.11	-0.84	-0.2	0.41	-0.1	-0.08	-1.05	-0.83	-0.68	-0.37	-0.71	-0.52	0.416541
YEL021W	URA3	metabolic process*	catalytic activity*	0	-0.54	-0.62	-0.76	-1.46	-1.55	-1.83	-2.13	-1.86	0.005	-0.425	-0.765	-0.865	-1.325	-1.455	-1.405	-1.425	-1.665	0.34	0.06	-0.23	-0.59	-0.88	-1.34	-1.44	-1.54	-1.71	-0.6	-0.5	-0.17	0.16	0.11	0.22	-0.66	-0.52	-0.42	-0.32	-0.14	0.2	-1.005	-0.745	-0.555	-0.715	-0.255	-0.425	-1.15
YEL053C	MAK10	telomere maintenance*	peptide alpha-N-acetyltransferase activity	0	-0.7	-0.82	-0.77	-0.94	-0.99	-1.29	-1.15	-1.83	-0.105	-1.385	-1.335	-1.125	-0.905	-0.945	-1.105	-0.975	-0.955	0.025	-0.125	-0.365	-1.425	-1.135	-1.155	-1.235	-1.235	-1.415	-0.38	-0.13	0.01	0.06	0.13	0.33	-0.1	-0.3	-0.08	-0.2	0.1	0.42	-0.995	-1.035	-0.915	-0.705	-0.625	-0.445	0
YEL072W	RMD6	biological_process*	molecular_function	0	0.03	-0.46	-1.58	-1.38	-1.66	-2.15	-2.32	-2.17	0.26	1.44	0.38	-0.01	-0.08	0.14	0.39	0.67	1.12	0.105	0.195	-0.515	-1.055	-1.315	-1.075	-1.105	-1.265	-0.975	-1.04	-0.82	-0.78	-0.87	-0.13	0.05	0.31	0.77	1.46	1.35	1.15	0.85	-0.565	-0.635	-0.595	-0.505	-0.625	-0.455	-1.20062
YER007C-A	TMA20	translation*	RNA binding	0	-0.79	-0.64	-0.77	-1.15	-1.19	-1.22	-1.41	-2.06	-0.04	-1.07	-1.04	-1.29	-1.83	-1.7	-1.66	-1.68	-1.79	0.065	-0.065	-0.275	-0.915	-1.565	-1.635	-1.325	-1.445	-1.305	-0.74	-0.29	-0.42	-0.44	-0.3	-0.11	-1.27	-0.88	-0.23	-0.05	0.19	-0.17	-1.11	-0.81	-0.63	-0.79	-0.38	-0.47	-0.119308
YER025W	GCD11	translation*	nucleotide binding*	0	-1.21	-0.89	-1.17	-1.17	-1.07	-1.19	-1.52	-1.42	0.105	-1.985	-1.625	-1.595	-2.245	-2.275	-2.115	-2.215	-2.425	0.065	-0.105	-0.425	-1.025	-1.445	-1.715	-1.475	-1.685	-1.575	-0.66	-0.68	-0.16	-0.01	0.06	0.06	-0.1	-0.19	-0.58	-0.39	-0.28	0.18	-1.165	-0.875	-0.705	-0.635	-0.245	-0.275	-0.282138
YER036C	ARB1	transport*	nucleotide binding*	0	-1.42	-1.05	-1.26	-1.1	-0.88	-1.4	-1.18	-1.38	0.105	-2.805	-0.975	-0.205	-0.565	-0.825	-1.085	-1.135	-1.485	0.2	-0.1	-0.3	-0.46	-0.74	-1.08	-1.08	-1.22	-1.5	-0.85	-0.78	-0.54	-0.54	-0.18	0.07	-0.26	-0.31	-0.77	-0.69	-0.52	0.15	-1.125	-1.185	-1.335	-1.535	-0.995	-1.005	0.28
YER056C	FCY2	transport*	nucleobase transmembrane transporter activity*	0	-3.3	-1.93	-0.9	-1.29	-0.83	-2.1	-2.03	-1.41	0.09	-1.25	-1.02	-0.31	-1.37	-1.71	-1.94	-1.9	-1.9	-0.515	-0.805	-0.985	-1.285	-1.795	-2.275	-2.165	-2.445	-2.475	-0.14	-0.11	-0.44	-0.77	-0.3	-0.32	1.89	1.73	0.83	0.8	0.57	0.49	-1.41	-1.17	-1.17	-1.13	-0.97	-1	-0.228181
YER056C	FCY2	transport*	nucleobase transmembrane transporter activity*	0	-3.3	-1.93	-0.9	-1.29	-0.83	-2.1	-2.03	-1.41	0.09	-1.25	-1.02	-0.31	-1.37	-1.71	-1.94	-1.9	-1.9	-0.515	-0.805	-0.985	-1.285	-1.795	-2.275	-2.165	-2.445	-2.475	-0.14	-0.11	-0.44	-0.77	-0.3	-0.32	1.89	1.73	0.83	0.8	0.57	0.49	-1.41	-1.17	-1.17	-1.13	-0.97	-1	-0.228181
YER061C	CEM1	lipid biosynthetic process*	transferase activity*	0	-0.81	-0.77	-1.08	-0.57	-0.04	-0.12	-0.08	-0.17	-0.14	-0.37	-1.04	-1.41	-1.7	-1.63	-1.53	-1.67	-1.58	-0.13	-0.4	-0.78	-0.53	-0.28	-0.27	-0.64	-1.21	-1.01	-0.26	-0.18	-0.08	-0.13	-0.16	0.08	-0.24	-0.54	-0.66	-0.36	-0.02	0.3	-1.835	-1.685	-1.685	-1.815	-1.395	-1.645	-0.126221
YER073W	ALD5	metabolic process*	oxidoreductase activity*	0	-1.24	-2.06	-1.21	-3.02	-3.58	-4.45	-5.06	-4.78	-0.16	-2.19	-2.21	-0.38	-0.45	-0.52	-0.97	-1.11	-0.21	-0.225	0.165	-0.095	-0.625	0.035	-0.225	-0.095	-0.475	-0.835	0.83	0.74	0.42	-0.16	-0.18	0.21	0.09	-0.28	-0.86	-0.72	-0.26	0.11	0.015	0.245	0.175	0.115	0.825	0.605	0.188803
YER089C	PTC2	G1/S transition of mitotic cell cycle*	hydrolase activity*	0	-0.05	-0.53	-0.62	-1.33	-1.16	-1.38	-1.32	-1.32	-0.075	0.195	-0.405	-1.065	-1.205	-1.155	-1.115	-1.155	-1.015	-0.02	0.08	0.06	-0.43	-0.72	-0.77	-1.11	-1.19	-1.17	-1.04	-0.5	-0.02	-0.2	-0.17	-0.19	0.48	0.14	-1.22	-1.15	-0.69	0.29	-1.885	-1.565	-1.665	-1.555	-1.055	-1.305	-0.112627
YER113C	YER113C	biological_process	molecular_function	0	-0.72	-0.7	-0.87	-1.31	-1.37	-1.38	-1.44	-1.48	-0.34	-1.09	-1.26	-1.18	-1.1	-1.02	-1.03	-1.14	-1.1	-0.44	-0.68	-0.79	-1.33	-1.33	-1.28	-1.42	-1.18	-1.39	-0.8	-0.66	-0.58	-0.54	-0.14	-0.11	-1.02	-0.78	-0.25	-0.09	-0.07	-0.21	-0.37	-0.37	-0.21	-0.19	-0.13	-0.08	-0.340989
YER118C	SHO1	pseudohyphal growth*	osmosensor activity	0	-1.75	-1.41	-0.91	-1.35	-1.34	-1.72	-1.93	-2.29	-0.37	-1.39	-1.25	-1.45	-1.28	-1.32	-1.36	-1.39	-1.66	-0.525	-0.655	-0.685	-1.825	-2.325	-2.275	-2.335	-2.435	-2.415	-0.73	-0.68	-0.52	-0.48	-0.13	-0.03	-0.93	-0.98	-0.91	-0.65	-0.09	0.22	-0.635	-0.715	-0.595	-0.315	-0.155	0.125	-0.663801
YER149C	PEA2	pseudohyphal growth*	cytoskeletal regulatory protein binding	0	-1.73	-1.34	-1.01	-1.56	-1.46	-1.91	-1.96	-2.23	0.04	-0.91	-0.8	-1.04	-1.15	-0.91	-0.92	-0.99	-1.16	0.055	-0.225	-0.305	-0.625	-1.035	-1.085	-1.055	-0.965	-1.095	-0.22	-0.21	-0.23	-0.32	-0.25	-0.22	-0.48	-0.42	-0.44	0	-0.02	-0.27	0.25	0.27	0.14	-0.06	0.13	0.02	-0.476865
YER165W	PAB1	regulation of translational initiation	nucleotide binding*	0	-1.45	-1.03	-0.89	-0.51	-0.51	-0.69	-0.63	-1.14	0.15	-2.02	-1.63	-1.13	-1.12	-1.3	-1.32	-1.14	-1.35	0.32	0.23	0.04	-0.64	-0.83	-0.92	-0.95	-0.98	-1.25	-0.17	-0.53	-0.08	-0.01	0.05	0.18	0.55	0.38	-0.45	-0.58	-0.4	0.29	-0.725	-0.505	-0.745	-0.675	-0.275	-0.285	0.317335
YER168C	CCA1	RNA processing*	nucleotide binding*	0	-0.4	-0.45	-0.42	-1.27	-1.34	-1.59	-1.71	-1.42	-0.01	-0.74	-0.89	-1.28	-1.35	-1.18	-0.98	-0.99	-0.71	0.135	-0.095	-0.265	-0.755	-1.135	-0.845	-0.625	-0.625	-0.565	-0.02	-0.02	-0.08	-0.14	0.07	0.09	-0.24	-0.32	-0.16	0.18	0.09	0.05	-0.29	-0.19	-0.09	-0.13	0.02	0.07	-1.01087
YER183C	FAU1	folic acid and derivative biosynthetic process	ATP binding*	0	-0.33	-0.51	-0.79	-0.74	-0.85	-0.87	-0.51	-0.79	-0.17	-0.08	-0.58	-0.79	-0.68	-0.6	-0.58	-0.71	-0.81	-0.06	-0.1	-0.18	-0.65	-1.08	-0.77	-0.74	-0.86	-0.63	-0.41	0	-0.49	-0.47	0.17	0.37	-1.37	-0.97	-0.2	0.1	-0.07	0.15	-0.85	-0.85	-0.63	-0.42	-0.34	-0.21	-0.268378
YFL001W	DEG1	tRNA processing*	isomerase activity*	0	-1.18	-0.92	-0.92	-1.63	-1.63	-2.08	-2.26	-1.84	-0.095	-2.025	-1.525	-1.755	-2.185	-1.955	-1.825	-1.645	-1.755	0.055	-0.055	-0.325	-0.785	-1.715	-1.995	-1.955	-1.905	-1.825	-0.46	-0.41	0.01	-0.05	0.06	0.15	-0.44	-0.39	-0.61	-0.32	-0.25	0.03	-1.01	-0.92	-0.94	-1.19	-0.88	-0.73	-0.75
YFL010C	WWM1	biological_process	molecular_function	0	0.27	0.25	-0.02	-1.39	-1.03	-1.26	-1.24	-1.07	0.235	1.525	0.705	-0.025	-0.775	-0.505	-0.255	-0.125	-0.075	-0.04	0.06	0.4	0.55	-0.53	-0.93	-1.03	-0.97	-0.76	-0.09	0.03	0.36	0.35	0.18	0.36	0.53	0.23	-0.59	-0.54	0.18	0.49	-1.545	-1.235	-1.045	-1.165	-0.635	-0.435	-0.730675
YFL028C	CAF16	transport*	nucleotide binding*	0	-0.26	-0.56	-0.14	-1.43	-1.69	-2.03	-2.05	-2.01	-0.1	-0.06	-0.67	-0.48	-0.59	-0.54	-0.56	-0.61	-0.33	0.035	0.035	-0.085	-0.325	-0.625	-0.655	-0.835	-0.985	-1.015	0.64	0.82	0.27	0	-0.03	-0.02	-0.87	-0.56	-0.07	0.21	0.02	-0.17	0.81	0.58	0.64	0.59	0.84	0.95	-0.890392
YFL047W	RGD2	signal transduction*	GTPase activator activity*	0	-0.52	-0.79	-1.16	-1.03	-0.83	-0.77	-0.55	-0.88	-0.155	-0.615	-0.945	-1.085	-0.665	-0.655	-0.575	-0.635	-0.485	-0.02	-0.26	-0.32	-0.7	-0.71	-0.64	-0.51	-0.56	-0.58	-0.61	-0.33	-0.34	-0.38	-0.18	-0.03	-0.87	-0.72	-0.6	-0.6	-0.2	-0.16	-0.075	0.145	0.005	0.075	0.025	0.145	-0.521339
YFR005C	SAD1	mRNA processing*	metal ion binding*	0	-1.07	-1.38	-1.19	-1.9	-1.6	-1.59	-1.4	-1.56	0.01	-0.53	-1.13	-1.41	-1.84	-1.79	-1.52	-1.62	-1.46	0.155	-0.155	-0.675	-1.305	-1.255	-1.395	-1.225	-1.345	-1.265	-0.8	-0.43	-0.01	-0.1	0.3	0.39	-1.04	-0.64	-0.08	0.02	0.22	0.37	-1.77	-1.51	-1.47	-1.32	-1.03	-1.19	-0.4
YFR009W	GCN20	regulation of translational elongation	nucleotide binding*	0	-0.65	-0.84	-0.95	-1.5	-1.52	-1.94	-1.9	-1.97	0.135	-0.175	-0.685	-1.175	-1.615	-1.695	-1.565	-1.515	-1.535	0.21	0.14	0.08	-0.64	-1.32	-1.4	-1.42	-1.35	-1.28	-0.44	-0.51	-0.15	-0.08	0.14	0.22	0.31	0.29	-0.23	0.08	-0.04	0.33	-0.4	-0.35	-0.3	-0.43	-0.11	2.78e-17	-0.488141
YFR030W	MET10	transport*	oxidoreductase activity*	0	0.37	-0.26	-1.26	-0.97	-1.44	-2.72	-3.34	-3.86	0.07	-0.13	-1.41	-1.59	-1.42	-1.2	-0.98	-0.58	2.02	0.24	0.31	-0.14	-1.63	-3.29	-3.16	-3.12	-3.1	-3.1	-0.4	-0.67	-0.62	-0.39	-0.16	0.07	0.33	-0.03	-0.86	-0.65	-0.57	-0.11	-1.375	-1.335	-1.215	-1.105	-0.575	-0.045	-0.529701
YFR055W	YFR055W	amino acid biosynthetic process*	catalytic activity*	0	-1.34	-1.63	-1.83	-2.21	-2.34	-2.35	-3.05	-2.12	0.005	0.615	-0.345	-1.385	-1.755	-1.965	-1.755	-1.985	-1.755	-0.835	-0.935	-1.155	-1.645	-2.415	-2.905	-2.845	-3.145	-2.905	-0.89	-0.07	-0.44	-0.68	-0.46	0.01	0.26	0.58	1.13	1.47	1.94	2.17	-1.885	-1.215	-1.055	-0.685	-0.605	-0.645	-0.94
YGL070C	RPB9	transcription*	transferase activity*	0	-0.86	-1.07	-1.11	-2.11	-2.14	-2.13	-2.01	-1.3	-0.165	-0.965	-1.595	-2.175	-2.615	-2.515	-2.455	-2.255	-1.955	0.2	-0.05	-0.13	-1.05	-2.08	-2.12	-2.08	-2.06	-2.06	-0.82	-0.49	-0.66	-0.44	-0.06	-0.08	-1.27	-0.7	-0.38	-0.51	-0.21	-0.14	-1.125	-0.795	-0.595	-0.425	-0.205	0.075	-1.51
YGL105W	ARC1	tRNA aminoacylation for protein translation*	DNA binding*	0	-0.05	0.01	-0.36	-0.88	-0.9	-1.47	-1.92	-2.69	0.235	0.515	-0.115	-0.245	-0.545	-0.705	-0.835	-0.885	-1.385	0.14	0.16	0.22	-0.43	-1.26	-1.61	-1.49	-1.54	-1.76	-0.37	-0.32	0.06	0.19	-0.03	0.02	-0.01	0.07	-0.02	0.12	0.33	0.22	-0.435	-0.265	-0.105	-0.115	0.075	-0.075	0.32
YGL119W	ABC1	protein folding*	molecular_function	0	0.38	0.22	-0.43	-0.79	-1.06	-1.27	-1.4	-2.19	-0.125	-0.655	-0.645	-0.355	-0.345	-0.455	-0.495	-0.375	-0.455	-0.19	-0.33	-0.44	-0.31	-0.25	-0.78	-0.9	-0.37	-0.93	-0.05	-0.28	-0.37	-0.31	0.1	0.26	0	0.07	-0.12	0.07	0.17	0.25	0.775	0.705	0.635	0.325	0.605	0.815	0.0609952
YGL148W	ARO2	amino acid biosynthetic process*	lyase activity*	0	-1.75	-1.37	-0.67	-2.13	-1.78	-2	-2.11	-1.79	0.095	-1.625	-2.105	-1.645	-1.915	-1.665	-1.615	-1.505	-1.055	0.01	0.31	0.12	-0.75	-1.3	-1.65	-1.57	-1.92	-2.21	0.04	0.07	-0.21	-0.19	-0.18	0.01	-0.74	-0.95	-1.66	-1.41	-0.8	-0.27	-1.5	-1.07	-1.23	-1.12	-0.31	-0.46	-0.484236
YGL202W	ARO8	biosynthetic process*	transferase activity*	0	-0.46	-0.92	-0.27	-2.71	-2.49	-2.6	-2.7	-3.43	0.325	2.355	-0.355	-1.005	-2.375	-1.525	-1.235	-1.115	-0.775	-0.075	0.185	0.145	-0.775	-2.535	-2.945	-3.075	-3.115	-3.405	0.71	0.33	0.03	0.01	0.13	0.28	0.64	1.27	0.19	0.67	0.62	0.98	-0.915	-0.585	-0.385	-0.295	0.335	0.385	-0.6785
YGL246C	RAI1	transcription*	enzyme regulator activity	0	-0.88	-0.93	-0.77	-1.12	-1.03	-1.47	-1.81	-2.1	0.03	-1.05	-1.09	-1.1	-1.54	-1.33	-1.19	-1.11	-1.06	0.275	-0.185	-0.365	-0.925	-1.595	-1.565	-1.515	-1.425	-1.505	-0.79	-0.1	-0.33	-0.28	-0.12	-0.02	-1.16	-0.58	0.01	0.25	0.15	0.07	-0.485	-0.405	-0.215	0.185	0.025	-0.005	-0.63
YGL256W	ADH4	metabolic process*	metal ion binding*	0	-1.2	-1.32	-1.44	-0.88	-0.54	-0.46	-0.3	-0.58	-0.145	-1.015	-1.415	-1.215	-1.355	-1.305	-1.255	-1.195	-0.995	-0.07	-0.23	-0.39	-0.46	-0.43	-0.62	-0.81	-0.83	-0.93	-0.79	-0.67	-0.53	-0.34	-0.25	0.12	-0.43	-0.24	-0.59	-0.23	-0.13	0.21	-1.585	-1.215	-1.475	-1.235	-1.005	-0.755	-0.27
YGR001C	YGR001C	biological_process	methyltransferase activity	0	-1.04	-0.72	-0.83	-1.21	-0.92	-0.61	-0.71	-1.25	0.08	-0.53	-0.52	-0.66	-1.04	-0.8	-0.63	-0.76	-0.77	0.235	0.135	-0.185	-0.485	-1.085	-1.135	-1.145	-1.415	-1.015	-0.28	0.12	-0.09	-0.36	-0.02	0.09	-1.3	-1.11	-0.19	-0.01	-0.1	-0.03	-0.625	-0.675	-0.575	-0.495	-0.455	-0.385	0.16
YGR020C	VMA7	transport*	hydrolase activity*	0	-0.54	-0.95	-1.21	-2.13	-2.31	-2.46	-2.6	-2.72	0.075	0.075	-0.215	-0.785	-1.095	-1.225	-1.235	-1.315	-1.315	0.23	0.17	0.16	-0.38	-1.62	-1.62	-1.92	-1.88	-1.56	-1.24	-0.9	-0.45	-0.43	-0.22	-0.14	-1.76	-1.1	-0.01	0.09	0.34	0.29	-0.75	-0.57	0	0.21	0.2	0.24	-0.92301
YGR036C	CAX4	telomere maintenance*	hydrolase activity*	0	0.31	0.18	-0.66	-0.65	-1.56	-2.58	-2.78	-3.04	-0.28	-0.07	-0.55	-0.87	-1.58	-1.68	-1.6	-1.55	-1.58	-0.335	-0.475	-0.695	-0.915	-0.685	-0.675	-0.955	-1.305	-2.255	-1.1	-0.87	-0.76	-0.41	-0.2	-0.1	-1.32	-0.82	-0.48	-0.67	-0.15	-0.07	-0.995	-0.925	-0.875	-0.505	-0.485	-0.335	-0.34779
YGR040W	KSS1	cell cycle*	nucleotide binding*	0	-0.5	-0.74	-0.98	-0.24	-0.05	-0.08	-0.25	-0.37	0.04	-0.4	-1.3	-1.43	-1.41	-1.05	-0.97	-0.9	-1.12	-0.185	-0.415	-0.915	-1.255	-0.685	-0.915	-0.665	-0.815	-0.945	-0.76	-0.32	-0.05	-0.27	-0.31	-0.01	-0.07	-0.49	-0.38	-0.65	0.01	0.07	-1.23	-0.76	-0.99	-0.79	-0.61	-0.93	-0.641986
YGR054W	YGR054W	translation*	translation initiation factor activity	0	-0.36	-0.66	-0.93	-0.86	-0.76	-0.73	-1.03	-0.51	-0.075	-1.025	-1.045	-1.305	-0.845	-0.695	-0.705	-0.995	-1.165	0.175	-0.115	-0.225	-0.995	-1.315	-1.285	-1.325	-1.495	-1.445	-1	-0.97	-0.63	-0.22	-0.04	0.03	-0.64	-0.74	-1.29	-1.42	-0.69	-0.3	-1.42	-0.82	-0.79	-0.53	-0.35	-0.22	-0.489444
YGR078C	PAC10	protein folding*	unfolded protein binding*	0	-1.18	-1.29	-1.3	-2.27	-2.67	-3.37	-3.54	-3.52	-0.09	-1.02	-0.82	-1.16	-1.43	-1.44	-1.46	-1.39	-1.57	0.085	-0.055	-0.095	-0.745	-1.745	-2.165	-2.185	-2.185	-2.035	-0.39	-0.22	-0.24	-0.28	-0.16	0.16	-0.83	-0.56	-0.31	-0.06	0.12	0.16	0.44	0.49	0.51	0.41	0.66	0.69	-0.262199
YGR083C	GCD2	translation*	translation initiation factor activity*	0	-1.13	-0.92	-0.62	-0.8	-0.79	-0.98	-1.08	-0.9	0.015	-1.905	-1.325	-1.015	-1.185	-1.135	-1.195	-1.265	-1.185	0.155	-0.055	-0.175	-0.865	-0.905	-0.845	-0.785	-0.735	-0.735	-0.38	-0.47	0.01	-0.08	0.1	0.14	0.27	0.04	-0.33	-0.22	-0.08	0.17	-1.045	-1.065	-0.865	-0.875	-0.635	-0.495	-0.06
YGR124W	ASN2	metabolic process*	ligase activity*	0	-0.58	-1.05	-0.75	-2.24	-1.78	-2.11	-1.67	-0.69	0.075	-1.285	-2.365	-2.135	-1.795	-1.545	-1.425	-1.265	-0.675	-0.09	0.05	0.15	-1.22	-1.85	-2.01	-2.16	-2.26	-2.37	0.74	0.3	0.32	0.37	0.23	0.3	-0.87	-0.78	-1.65	-1.19	-0.78	-0.07	-0.615	-0.485	-0.505	-0.695	0.295	0.425	-0.600492
YGR136W	LSB1	biological_process	molecular_function	0	0.63	0.02	-0.28	-1.38	-2.04	-2.62	-2.69	-2.92	0.015	0.765	-0.135	-0.865	-1.005	-1.025	-1.035	-1.095	-0.885	-0.265	-0.095	-0.145	-0.355	-1.295	-1.955	-1.985	-1.765	-1.835	-0.13	0.12	0.07	0.18	0.1	0.04	-0.29	-0.16	-0.25	-0.41	0.3	0.59	-2.03	-2.1	-1.93	-1.79	-1.53	-1.61	-1.16047
YGR136W	LSB1	biological_process	molecular_function	0	0.63	0.02	-0.28	-1.38	-2.04	-2.62	-2.69	-2.92	0.015	0.765	-0.135	-0.865	-1.005	-1.025	-1.035	-1.095	-0.885	-0.265	-0.095	-0.145	-0.355	-1.295	-1.955	-1.985	-1.765	-1.835	-0.13	0.12	0.07	0.18	0.1	0.04	-0.29	-0.16	-0.25	-0.41	0.3	0.59	-2.03	-2.1	-1.93	-1.79	-1.53	-1.61	-1.16047
YGR166W	KRE11	transport*	molecular_function	0	-0.67	-0.96	-1.07	-1.75	-1.6	-1.81	-1.72	-2.08	-0.095	-0.875	-1.515	-1.445	-1.655	-1.395	-1.065	-1.045	-1.115	-0.025	-0.255	-0.375	-1.655	-1.715	-1.305	-1.075	-0.895	-1.155	-0.23	-0.28	0.02	-0.1	-0.02	-0.01	-0.58	-0.54	-0.33	-0.08	0.08	0.14	-0.105	-0.255	-0.015	0.115	0.215	0.555	-0.360381
YGR169C	PUS6	tRNA processing*	RNA binding*	0	0.19	0.1	-0.93	-1.56	-1.61	-1.77	-1.92	-1.94	-0.16	-0.76	-1.71	-1.68	-2.02	-1.89	-1.86	-1.79	-1.94	-0.03	-0.38	-0.68	-1.51	-1.79	-1.99	-1.91	-1.81	-2.02	-0.78	-0.44	-0.58	-0.48	0.03	0.18	-1.36	-1.17	-0.84	-0.8	-0.62	-0.59	-0.66	-0.51	-0.46	-0.34	-0.26	-0.37	-1.15869
[truncated: 224 more rows]
[truncated: 16 more columns]

## Sheet: Rb_stressgene_cls
systematic	NAME	biological_process	molecular_function	Glucose_Starvation_0	Glucose_Starvation_30	Glucose_Starvation_90	Glucose_Starvation_270	Glucose_Starvation_1440	Glucose_Starvation_2880	Glucose_Starvation_4320	Glucose_Starvation_5760	Glucose_Starvation_11520	Nitrogen_Starvation_0	Nitrogen_Starvation_30	Nitrogen_Starvation_90	Nitrogen_Starvation_270	Nitrogen_Starvation_1440	Nitrogen_Starvation_2880	Nitrogen_Starvation_4320	Nitrogen_Starvation_5760	Nitrogen_Starvation_11520	Phosphate_Starvation_0	Phosphate_Starvation_30	Phosphate_Starvation_90	Phosphate_Starvation_270	Phosphate_Starvation_1440	Phosphate_Starvation_2880	Phosphate_Starvation_4320	Phosphate_Starvation_5760	Phosphate_Starvation_11520	Glucose_Limitation_0.05	Glucose_Limitation_0.1	Glucose_Limitation_0.015	Glucose_Limitation_0.2	Glucose_Limitation_0.25	Glucose_Limitation_0.3	Nitrogen_Limitation_0.05	Nitrogen_Limitation_0.1	Nitrogen_Limitation_0.015	Nitrogen_Limitation_0.2	Nitrogen_Limitation_0.25	Nitrogen_Limitation_0.3	Phosphate_Limitation_0.05	Phosphate_Limitation_0.1	Phosphate_Limitation_0.015	Phosphate_Limitation_0.2	Phosphate_Limitation_0.25	Phosphate_Limitation_0.3	YMC_T1
[truncated: 878 more rows]
[truncated: 16 more columns]

[truncated: 2 more sheets: Rc_stressgene_cls, Mitochondrion related RB genes]
