# Supplementary figures and images for: Msn2/4 regulate expression of glycolytic enzymes and control transition from quiescence to growth
Source: eLife journal article supplement (doi:10.7554/elife.29938), 2017-09-26

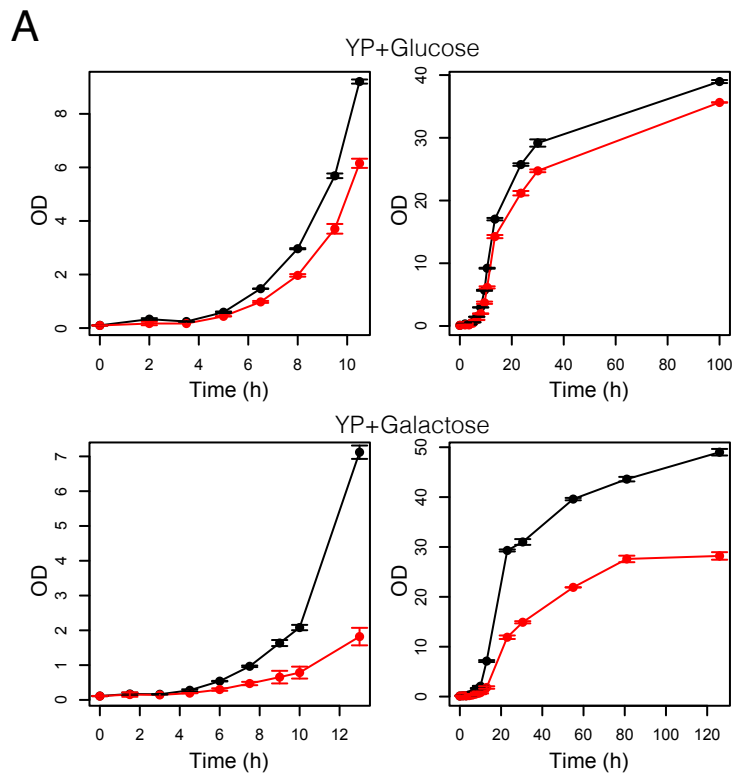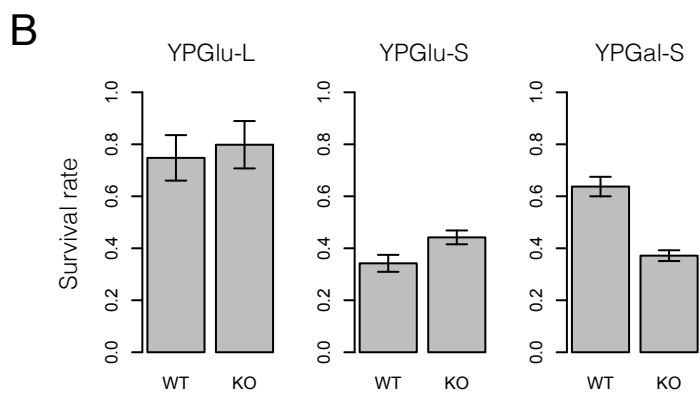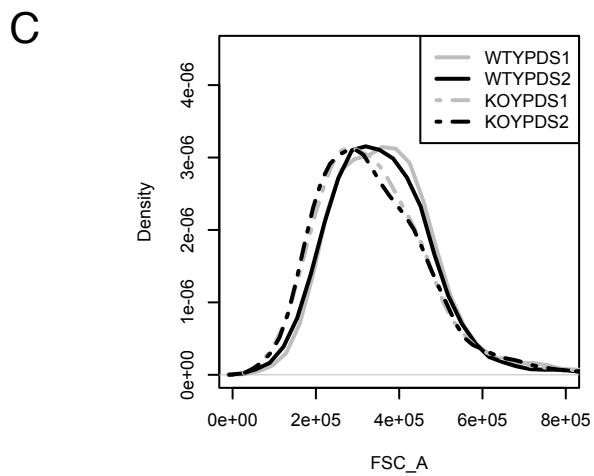

Figure 3-Figure Supplement 3

Supplement: supp [file elife-29938-supp-v1.zip]

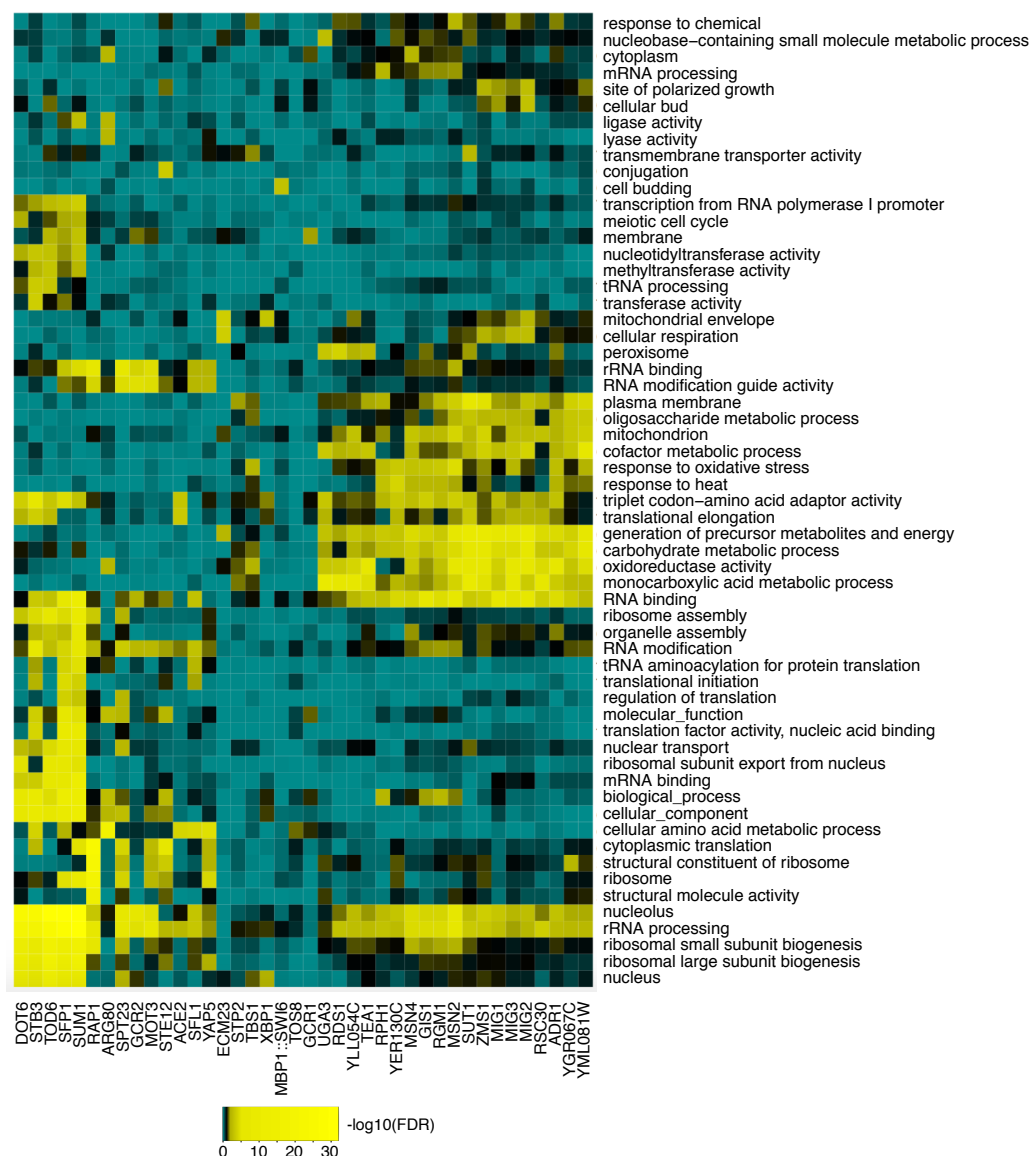

Figure 1-Figure Supplement 1

Supplement: supp [file elife-29938-supp-v1.zip]

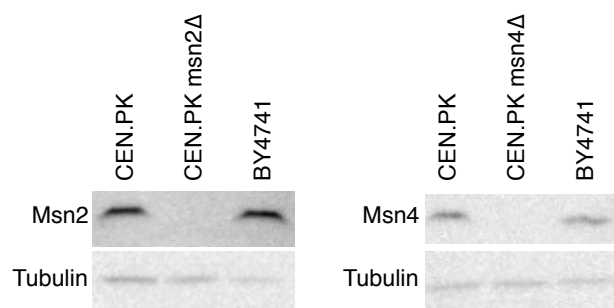

Figure 2-Figure Supplement 1

Supplement: supp [file elife-29938-supp-v1.zip]

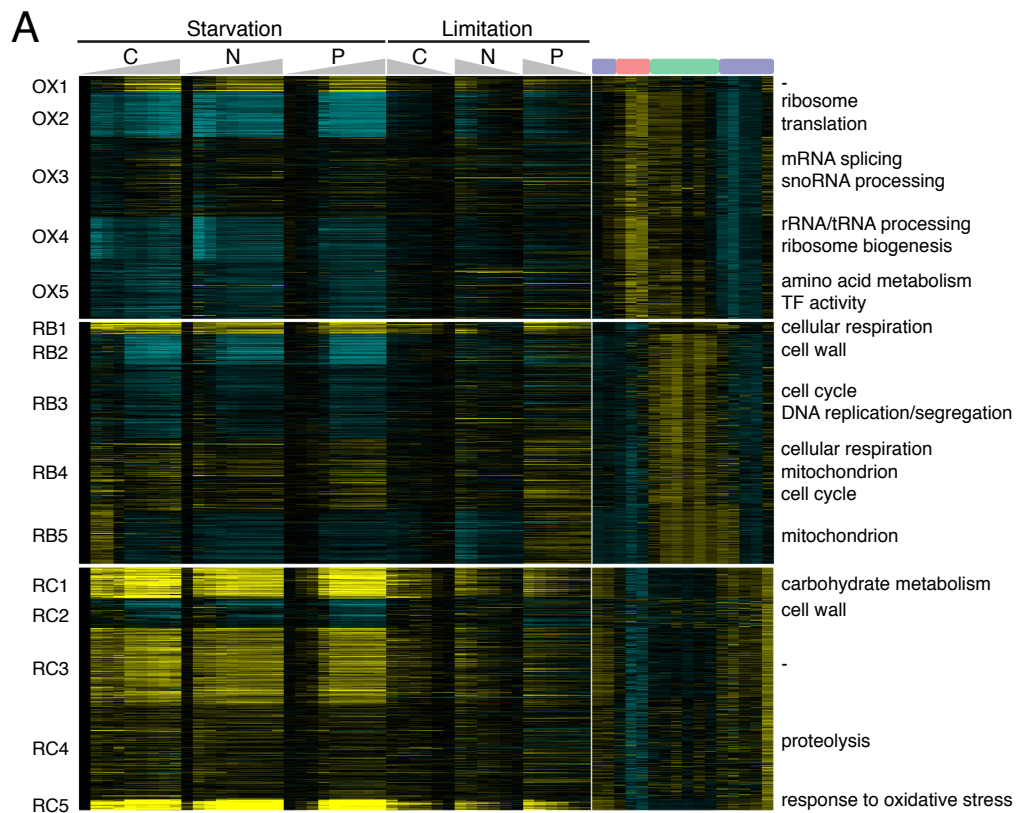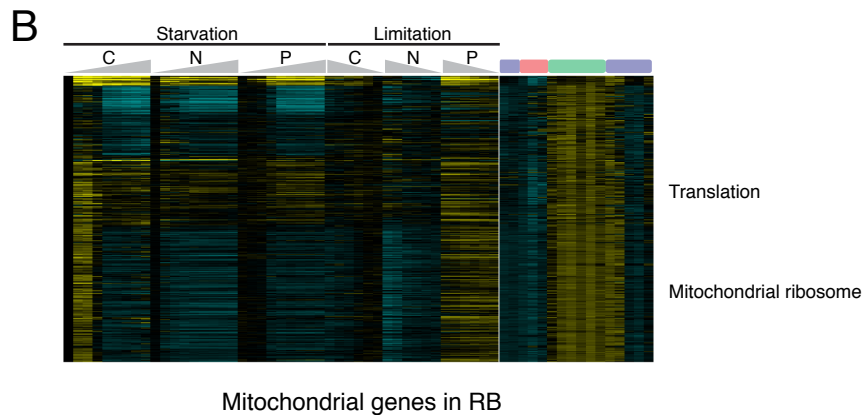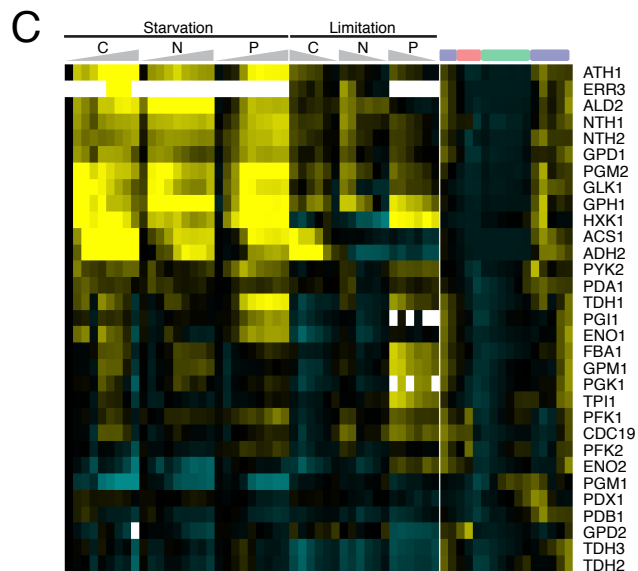

Figure 4-Figure Supplement 1

Supplement: supp [file elife-29938-supp-v1.zip]

**A**

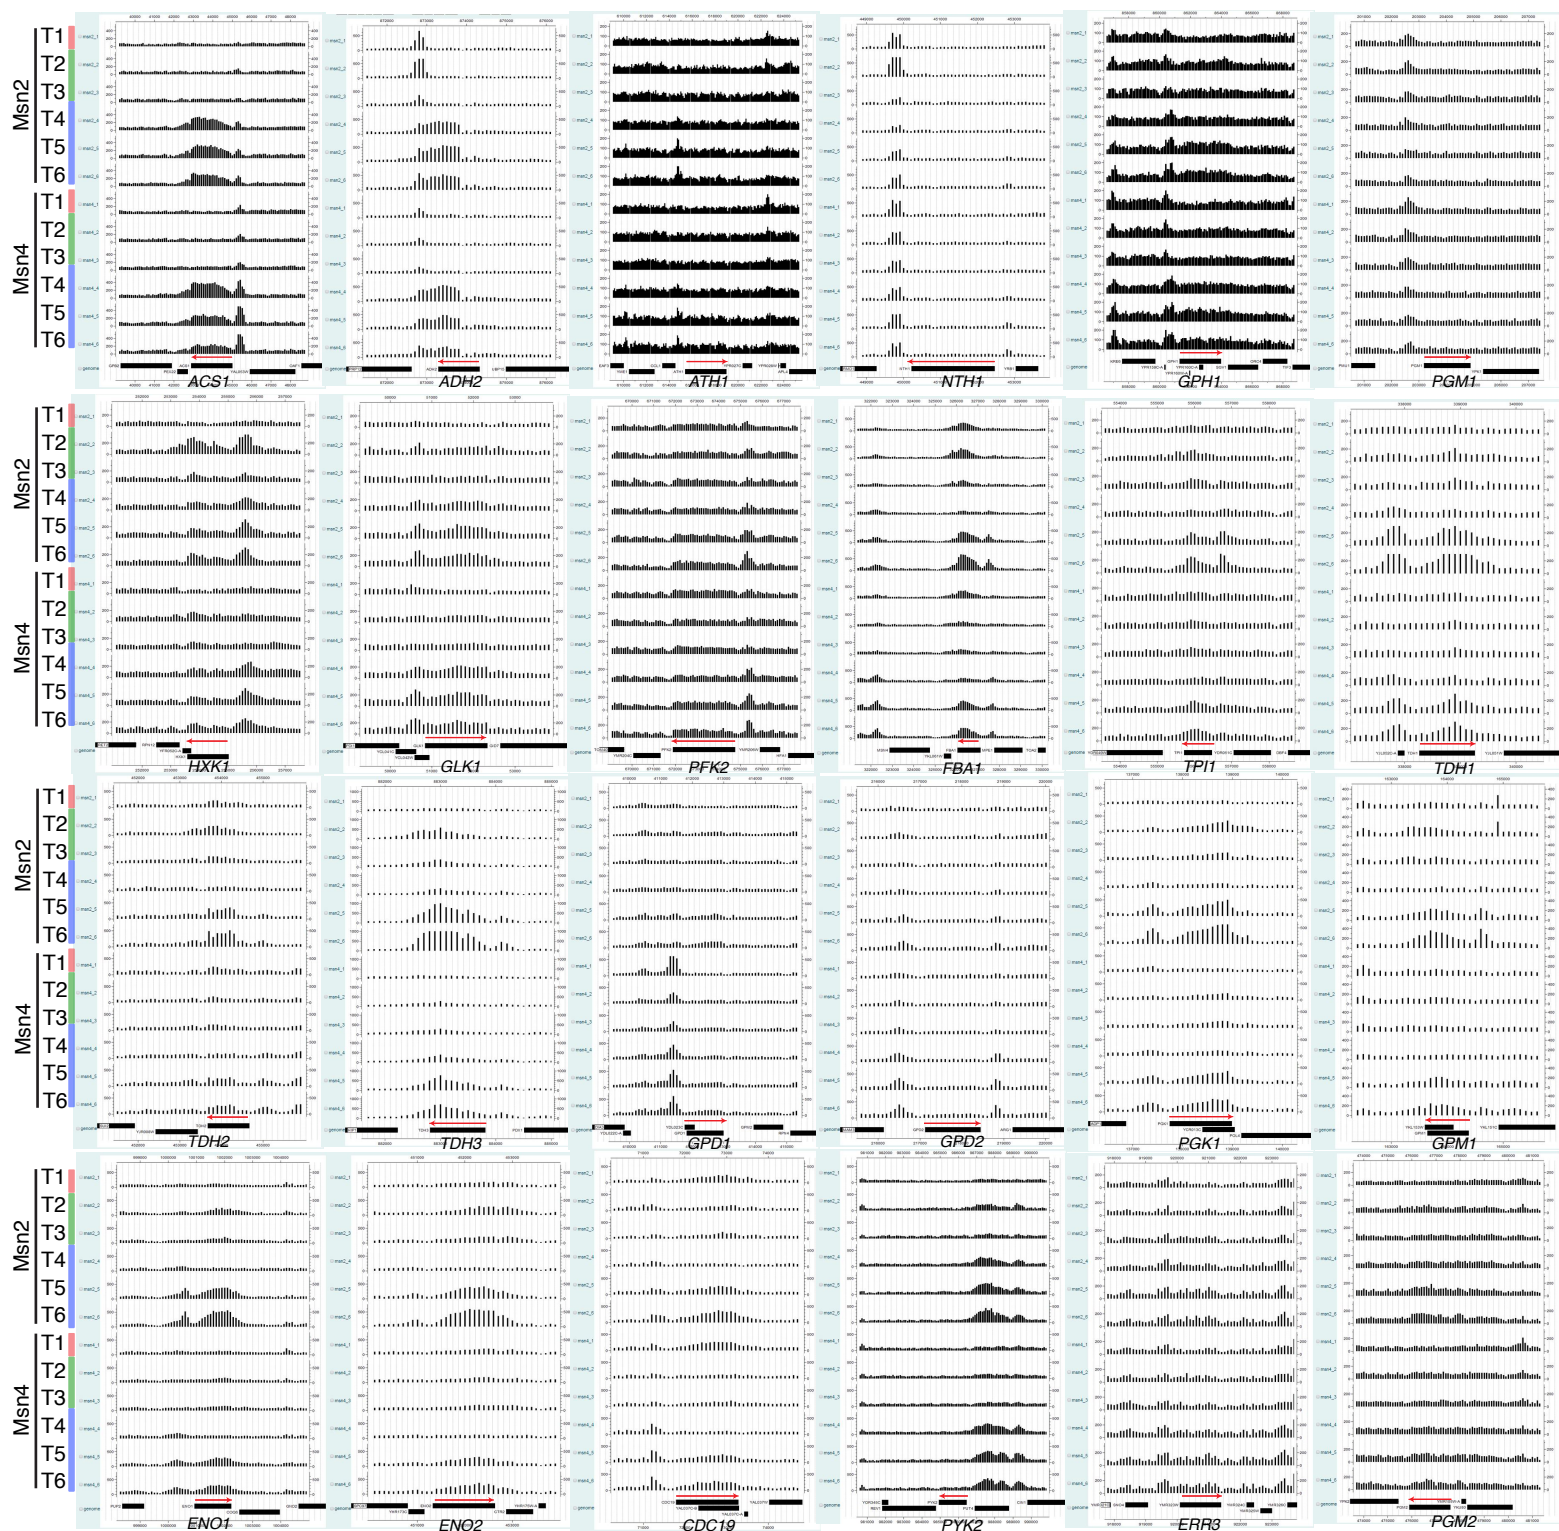

**B**

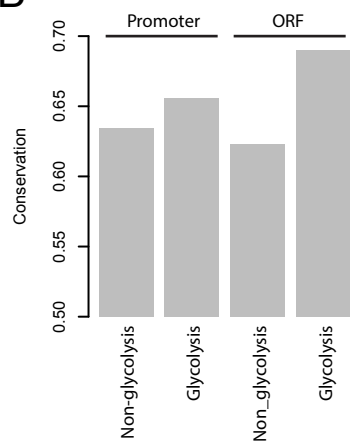

Figure 3-Figure Supplement 1

Supplement: supp [file elife-29938-supp-v1.zip]
